# Supplementary material for: The genomic epidemiology of shigellosis in South Africa
Source: Research Square preprint supplement (doi:10.21203/rs.3.rs-2923767/v1), 2023-05-26
Supplement: Supplementary file 1 [file 7c10cc64b1da0c67f833d1cb.xlsx]

## Sheet: Data
Barcode number	Read accession	Strain name	Species	Re-sequenced	Sample received?	Reads used	Passed read QC	Passed map QC	Passed assembly QC	ShigaTyper	Sample date	Year (YYYY)	Province	District	Specimen	Source	Invasive	Gender	Age	Age Bracket	Ampicillin phenotype	Chloramphenicol phenotype	Streptomycin phenotype	Tetracycline phenotype	Nalidixic acid phenotype	Ciprofloxacin phenotype	Ceftrioxone phenotype	Cotrimoxazole phenotype	SonneiTyping genotype	BAPS cluster
FD01872847	ERS12564449	667815	Shigella flexneri 2A	yes	yes	yes, merged (original and re-sequenced reads)	yes	yes	yes	Shigella flexneri serotype 2a	2013-03-22	2012	Gauteng	EKH	Stool culture	Stool	N	MALE	Unknown	Unknown	S	S	S	S	S	S	S	R	ND	1
FD01872848	ERS12564450	684024	Shigella flexneri 2A	no	yes	Yes	yes	yes	yes	Shigella flexneri serotype 2a	2013-06-07	2012	Eastern Cape	NMM	Stool culture	Stool	N	MALE	2	1 - 4	S	S	S	S	S	S	S	R	ND	1
FD01872849	ERS12564451	708666	Shigella flexneri 2A	no	yes	Yes	yes	yes	yes	Shigella flexneri serotype 2a	2013-06-08	2012	Mpumalanga	EHL	Stool culture	Stool	N	FEMALE	Unknown	Unknown	R	S	R	R	S	S	S	R	ND	1
FD01872850	ERS12564452	732275	Shigella flexneri 2A	yes	yes	No	yes	yes	yes	EIEC	2013-02-05	2013	KwaZulu-Natal	ETH	Stool culture	Stool	N	MALE	2	1 - 4	R	R	R	R	S	S	S	R	ND	2
FD01872851	ERS12564453	751999	Shigella flexneri 2A	yes	yes	yes, merged (original and re-sequenced reads)	yes	yes	yes	Shigella flexneri serotype 2a	2013-03-23	2013	Eastern Cape	NMM	Stool culture	Stool	N	MALE	2	1 - 4	S	S	R	S	S	S	S	R	ND	2
FD01872852	ERS12564454	776179	Shigella flexneri 2A	yes	yes	yes, merged (original and re-sequenced reads)	yes	yes	yes	Shigella flexneri serotype 2a	2013-03-24	2013	Western Cape	CAT	Stool culture	Stool	N	MALE	3	1 - 4	R	R	R	R	S	S	S	R	ND	3
FD01872853	ERS12564455	800550	Shigella flexneri 2A	yes	yes	yes, merged (original and re-sequenced reads)	yes	yes	yes	Shigella flexneri serotype 2a	2013-03-25	2013	Gauteng	WRA	Stool culture	Stool	N	FEMALE	Unknown	Unknown	R	R	R	R	S	S	S	S	ND	2
FD01872854	ERS12564456	814877	Shigella flexneri 2A	yes	yes	yes, merged (original and re-sequenced reads)	yes	yes	yes	Shigella flexneri serotype 2a	2013-02-06	2013	KwaZulu-Natal	ETH	Stool culture	Stool	N	Unknown	2	1 - 4	R	S	R	R	S	S	S	R	ND	2
FD01872855	ERS12564457	668150	Shigella flexneri 2A	no	yes	Yes	yes	yes	yes	Shigella flexneri serotype 2a	2013-06-09	2012	Western Cape	CAT	Stool culture	Stool	N	FEMALE	3	1 - 4	R	R	R	R	S	S	S	R	ND	2
FD01872856	ERS12564458	691909	Shigella flexneri 2A	no	yes	Yes	yes	yes	yes	Shigella flexneri serotype 2a	2013-06-10	2012	Western Cape	CAT	Stool culture	Stool	N	FEMALE	6	5 - 10	R	R	R	R	S	S	S	R	ND	2
FD01872857	ERS12564459	710535	Shigella flexneri 2A	no	yes	Yes	yes	yes	yes	Shigella flexneri serotype 2a	2013-06-11	2012	Gauteng	TSW	Stool culture	Stool	N	FEMALE	38	21 - 40	R	S	R	R	S	S	S	R	ND	1
FD01872858	ERS12564460	731911	Shigella flexneri 2A	yes	yes	yes, merged (original and re-sequenced reads)	yes	yes	yes	Shigella flexneri serotype 2a	2013-02-07	2013	Free State	MOT	Stool culture	Stool	N	MALE	2	1 - 4	S	S	S	S	S	S	S	R	ND	1
FD01872859	ERS12564461	752242	Shigella flexneri 2A	no	yes	Yes	yes	yes	yes	Shigella flexneri serotype 2a	2013-06-12	2013	Gauteng	TSW	Stool culture	Stool	N	MALE	2	1 - 4	R	R	R	R	S	S	S	R	ND	1
FD01872860	ERS12564462	777279	Shigella flexneri 2A	yes	yes	yes, merged (original and re-sequenced reads)	yes	yes	yes	Shigella flexneri serotype 2a	2013-03-26	2013	Western Cape	CAT	Stool culture	Stool	N	FEMALE	4	1 - 4	R	R	R	R	S	S	S	S	ND	3
FD01872861	ERS12564463	803678	Shigella flexneri 2A	yes	yes	yes, merged (original and re-sequenced reads)	yes	yes	yes	Shigella flexneri serotype 2a	2013-02-08	2013	Western Cape	WEC	Stool culture	Stool	N	MALE	1	1 - 4	R	R	R	R	S	S	S	S	ND	2
FD01872862	NA	815872	Shigella flexneri 2A	yes	yes	No	no - uneven GC content curve	ND	ND	ND	2013-06-01	2013	Gauteng	WRA	Stool culture	Stool	N	FEMALE	0	< 1	R	I	R	S	S	S	S	R	ND	ND
FD01872863	ERS12564464	669973	Shigella flexneri 2A	no	yes	Yes	yes	yes	yes	Shigella flexneri serotype 2a	2013-06-13	2012	Gauteng	Unknown	Stool culture	Stool	N	FEMALE	Unknown	Unknown	S	S	S	S	S	S	S	R	ND	1
FD01872864	NA	689488	Shigella flexneri 2A	no	yes	No	no - NA	ND	ND	ND	2013-05-31	2012	Free State	LEJ	Stool culture	Stool	N	MALE	3	1 - 4	R	R	R	S	S	S	S	R	ND	ND
FD01872865	ERS12564465	715658	Shigella flexneri 2A	no	yes	Yes	yes	yes	yes	Shigella flexneri serotype 2a	2013-06-14	2012	Western Cape	CAT	Stool culture	Stool	N	FEMALE	2	1 - 4	R	R	R	R	S	S	S	R	ND	2
FD01872866	ERS12564466	732945	Shigella flexneri 2A	yes	yes	yes, merged (original and re-sequenced reads)	yes	yes	yes	Shigella flexneri serotype 2a	2013-03-27	2013	Western Cape	CAT	Stool culture	Stool	N	MALE	23	21 - 40	R	R	R	R	S	S	S	S	ND	2
FD01872867	ERS12564467	755187	Shigella flexneri 2A	yes	yes	yes, merged (original and re-sequenced reads)	yes	yes	yes	Shigella flexneri serotype 2a	2013-03-28	2013	Gauteng	JBM	Stool culture	Stool	N	MALE	11	11 - 20	R	R	R	R	S	S	S	S	ND	3
FD01872868	ERS12564468	780289	Shigella flexneri 2A	yes	yes	yes, merged (original and re-sequenced reads)	yes	yes	yes	Shigella flexneri serotype 2a	2013-03-29	2013	Gauteng	JBM	Stool culture	Stool	N	MALE	4	1 - 4	R	R	R	S	S	S	S	S	ND	3
FD01872869	ERS12564469	804996	Shigella flexneri 2A	yes	yes	yes, merged (original and re-sequenced reads)	yes	yes	yes	Shigella flexneri serotype 2a	2013-03-30	2013	Eastern Cape	AMT	Stool culture	Stool	N	MALE	3	1 - 4	R	R	R	R	S	S	S	R	ND	4
FD01872870	ERS12564470	816099	Shigella flexneri 2A	yes	yes	yes, merged (original and re-sequenced reads)	yes	yes	yes	Shigella flexneri serotype 2a	2013-03-31	2013	Gauteng	EKH	Stool culture	Stool	N	MALE	3	1 - 4	R	R	R	R	S	S	S	S	ND	3
FD01872871	ERS12564471	671192	Shigella flexneri 2A	no	yes	Yes	yes	yes	yes	Shigella flexneri serotype 2a	2013-06-15	2012	Western Cape	CAT	Stool culture	Stool	N	MALE	40	21 - 40	R	R	R	R	S	S	S	R	ND	2
FD01872872	ERS12564472	691853	Shigella flexneri 2A	no	yes	Yes	yes	yes	yes	Shigella flexneri serotype 2a	2013-06-16	2012	Western Cape	WEC	Stool culture	Stool	N	FEMALE	30	21 - 40	R	R	R	R	S	S	S	R	ND	3
FD01872873	ERS12564473	712553	Shigella flexneri 2A	no	yes	Yes	yes	yes	yes	Shigella flexneri serotype 2a	2013-06-17	2013	Western Cape	GRO / EDE	Stool culture	Stool	N	FEMALE	57	41 - 60	R	R	R	R	S	S	S	S	ND	2
FD01872874	ERS12564474	735682	Shigella flexneri 2A	yes	yes	yes, merged (original and re-sequenced reads)	yes	yes	yes	Shigella flexneri serotype 2a	2013-04-01	2013	Eastern Cape	AMT	Stool culture	Stool	N	FEMALE	27	21 - 40	R	R	R	R	S	S	S	R	ND	2
FD01872875	ERS12564475	756146	Shigella flexneri 2A	yes	yes	yes, merged (original and re-sequenced reads)	yes	yes	yes	Shigella flexneri serotype 2a	2013-04-02	2013	Gauteng	JBM	Stool culture	Stool	N	MALE	Unknown	Unknown	R	R	R	R	S	S	S	S	ND	2
FD01872876	ERS12564476	781091	Shigella flexneri 2A	yes	yes	yes, merged (original and re-sequenced reads)	yes	yes	yes	Shigella flexneri serotype 2a	2013-04-03	2013	Gauteng	TSW	Stool culture	Stool	N	FEMALE	55	41 - 60	S	S	S	S	S	S	S	S	ND	1
FD01872877	ERS12564477	807899	Shigella flexneri 2A	yes	yes	yes, merged (original and re-sequenced reads)	yes	yes	yes	Shigella flexneri serotype 2a	2013-04-04	2013	Gauteng	JBM	Stool culture	Stool	N	FEMALE	6	5 - 10	R	S	R	R	S	S	S	R	ND	3
FD01872878	ERS12564478	816545	Shigella flexneri 2A	yes	yes	yes, merged (original and re-sequenced reads)	yes	yes	yes	Shigella flexneri serotype 2a	2013-04-05	2013	Eastern Cape	UKH	Stool culture	Stool	N	MALE	1	1 - 4	R	R	R	R	S	S	S	S	ND	2
FD01872879	ERS12564479	672793	Shigella flexneri 2A	no	yes	Yes	yes	yes	yes	Shigella flexneri serotype 2a	2013-06-18	2012	Western Cape	CAT	Stool culture	Stool	N	FEMALE	0	< 1	R	R	R	R	S	S	S	R	ND	4
FD01872880	ERS12564480	692684	Shigella flexneri 2A	no	yes	Yes	yes	yes	yes	Shigella flexneri serotype 2a	2013-06-19	2012	Northern Cape	FRB	Stool culture	Stool	N	MALE	61	61 - 80	R	R	R	R	S	S	S	R	ND	4
FD01872881	ERS12564481	717401	Shigella flexneri 2A	no	yes	Yes	yes	yes	yes	Shigella flexneri serotype 2a	2013-06-20	2013	Eastern Cape	NMM	Stool culture	Stool	N	MALE	1	1 - 4	R	R	R	R	S	S	S	R	ND	3
FD01872882	ERS12564482	737435	Shigella flexneri 2A	yes	yes	yes, merged (original and re-sequenced reads)	yes	yes	yes	Shigella flexneri serotype 2a	2013-04-06	2013	Western Cape	CAT	Stool culture	Stool	N	FEMALE	1	1 - 4	R	R	R	R	S	S	S	S	ND	4
FD01872883	ERS12564483	756951	Shigella flexneri 2A	yes	yes	yes, merged (original and re-sequenced reads)	yes	yes	yes	Shigella flexneri serotype 2a	2013-02-09	2013	Gauteng	TSW	Stool culture	Stool	N	MALE	62	61 - 80	S	S	S	S	S	S	S	S	ND	1
FD01872884	ERS12564484	783133	Shigella flexneri 2A	yes	yes	yes, merged (original and re-sequenced reads)	yes	yes	yes	Shigella flexneri serotype 2a	2013-04-07	2013	Gauteng	JBM	Stool culture	Stool	N	FEMALE	3	1 - 4	S	S	S	S	S	S	S	S	ND	1
FD01872885	ERS12564485	808162	Shigella flexneri 2A	no	yes	Yes	yes	yes	yes	Shigella flexneri serotype 2a	2013-06-21	2013	Gauteng	JBM	Stool culture	Stool	N	MALE	4	1 - 4	S	S	S	S	S	S	S	R	ND	1
FD01872886	NA	816650	Shigella flexneri 2A	yes	yes	No	no - uneven GC content curve	ND	ND	ND	2013-06-02	2013	Gauteng	TSW	Stool culture	Stool	N	FEMALE	0	< 1	R	R	R	R	S	S	S	S	ND	ND
FD01872887	ERS12564486	673185	Shigella flexneri 2A	no	yes	Yes	yes	yes	yes	Shigella flexneri serotype 2a	2013-06-22	2012	Western Cape	GRO / EDE	Stool culture	Stool	N	FEMALE	2	1 - 4	R	R	R	R	S	S	S	R	ND	2
FD01872888	ERS12564487	696473	Shigella flexneri 2A	no	yes	Yes	yes	yes	yes	Shigella flexneri serotype 2a	2013-06-23	2012	Eastern Cape	AMT	Stool culture	Stool	N	MALE	7	5 - 10	R	R	R	R	S	S	S	R	ND	2
FD01872889	ERS12564488	720306/720863	Shigella flexneri 2A	no	yes	Yes	yes	yes	yes	Shigella flexneri serotype 2a	2013-06-24	2013	Eastern Cape	NMM	Stool culture	Stool	N	FEMALE	53	41 - 60	R	R	R	R	S	S	S	S	ND	4
FD01872890	NA	738970	Shigella flexneri 2A	yes	yes	No	yes	yes	yes	Shigella flexneri serotype 3a	2013-04-08	2013	Free State	MOT	Stool culture	Stool	N	MALE	Unknown	Unknown	S	S	S	S	S	S	S	R	ND	ND
FD01872891	ERS12564489	762003	Shigella flexneri 2A	yes	yes	yes, merged (original and re-sequenced reads)	yes	yes	yes	Shigella flexneri serotype 2a	2013-04-09	2013	Free State	MOT	Stool culture	Stool	N	MALE	56	41 - 60	S	S	S	S	S	S	S	R	ND	1
FD01872892	ERS12564490	784836	Shigella flexneri 2A	yes	yes	yes, merged (original and re-sequenced reads)	yes	yes	yes	Shigella flexneri serotype 2a	2013-04-10	2013	Western Cape	CAT	Stool culture	Stool	N	MALE	1	1 - 4	R	R	R	R	S	S	S	S	ND	2
FD01872893	ERS12564491	809908	Shigella flexneri 2A	no	yes	Yes	yes	yes	yes	Shigella flexneri serotype 2a	2013-06-25	2013	Gauteng	WRA	Stool culture	Stool	N	MALE	4	1 - 4	R	R	R	R	S	S	S	R	ND	3
FD01872894	ERS12564492	816770	Shigella flexneri 2A	no	yes	Yes	yes	yes	yes	Shigella flexneri serotype 2a	2013-06-26	2014	Eastern Cape	NMM	Stool culture	Stool	N	FEMALE	1	1 - 4	S	Unknown	Unknown	Unknown	Unknown	S	Unknown	Unknown	ND	1
FD01872895	ERS12564493	674847	Shigella flexneri 2A	no	yes	Yes	yes	yes	yes	Shigella flexneri serotype 2a	2013-06-27	2012	Eastern Cape	NMM	Stool culture	Stool	N	FEMALE	5	5 - 10	R	R	R	R	S	S	S	R	ND	2
FD01872896	ERS12564494	698164	Shigella flexneri 2A	no	yes	Yes	yes	yes	yes	Shigella flexneri serotype 2a	2013-06-28	2012	Gauteng	JBM	Stool culture	Stool	N	FEMALE	Unknown	Unknown	S	S	S	S	S	S	S	S	ND	ND
FD01872897	ERS12564495	726364	Shigella flexneri 2A	yes	yes	yes, merged (original and re-sequenced reads)	yes	yes	yes	Shigella flexneri serotype 2a	2013-04-11	2013	Gauteng	EKH	Stool culture	Stool	N	FEMALE	Unknown	Unknown	S	S	S	S	S	S	S	R	ND	1
FD01872898	ERS12564496	742600	Shigella flexneri 2A	yes	yes	yes, merged (original and re-sequenced reads)	yes	yes	yes	Shigella flexneri serotype 2a	2013-04-12	2013	KwaZulu-Natal	ETH	Stool culture	Stool	N	FEMALE	54	41 - 60	R	R	R	R	S	S	S	R	ND	3
FD01872899	ERS12564497	764816	Shigella flexneri 2A	yes	yes	yes, merged (original and re-sequenced reads)	yes	yes	yes	Shigella flexneri serotype 2a	2013-04-13	2013	KwaZulu-Natal	ETH	Stool culture	Stool	N	MALE	1	1 - 4	R	R	R	R	S	S	S	R	ND	3
FD01872900	ERS12564498	785720	Shigella flexneri 2A	yes	yes	yes, merged (original and re-sequenced reads)	yes	yes	yes	Shigella flexneri serotype 2a	2013-04-14	2013	Western Cape	CKA	Stool culture	Stool	N	MALE	19	11 - 20	R	R	R	R	S	S	S	S	ND	4
FD01872901	ERS12564499	810726	Shigella flexneri 2A	yes	yes	yes, merged (original and re-sequenced reads)	yes	yes	yes	Shigella flexneri serotype 2a	2013-04-15	2013	Eastern Cape	AMT	Stool culture	Stool	N	MALE	0	< 1	R	R	R	R	S	S	S	R	ND	2
FD01872902	ERS12564500	817854/817863	Shigella flexneri 2A	yes	yes	yes, merged (original and re-sequenced reads)	yes	yes	yes	Shigella flexneri serotype 2a	2013-04-16	2014	Gauteng	JBM	Stool culture	Stool	N	MALE	6	5 - 10	R	Unknown	Unknown	Unknown	Unknown	S	Unknown	Unknown	ND	3
FD01872903	ERS12564501	676778	Shigella flexneri 2A	yes	yes	yes, merged (original and re-sequenced reads)	yes	yes	yes	Shigella flexneri serotype 2a	2013-04-17	2012	KwaZulu-Natal	ETH	Stool culture	Stool	N	MALE	4	1 - 4	R	R	R	R	S	S	S	S	ND	2
FD01872904	ERS12564502	701620	Shigella flexneri 2A	no	yes	Yes	yes	yes	yes	Shigella flexneri serotype 2a	2013-06-29	2012	Mpumalanga	EHL	Stool culture	Stool	N	MALE	2	1 - 4	R	R	R	R	S	S	S	R	ND	2
FD01872905	ERS12564503	723749	Shigella flexneri 2A	no	yes	Yes	yes	yes	yes	Shigella flexneri serotype 2a	2013-06-30	2013	Western Cape	CAT	Stool culture	Stool	N	MALE	100	1 - 4	R	R	R	R	S	S	S	R	ND	4
FD01872906	ERS12564504	745522	Shigella flexneri 2A	yes	yes	yes, merged (original and re-sequenced reads)	yes	yes	yes	Shigella flexneri serotype 2a	2013-04-18	2013	KwaZulu-Natal	ETH	Stool culture	Stool	N	FEMALE	8	5 - 10	R	R	R	R	S	S	S	R	ND	4
FD01872907	ERS12564505	767951	Shigella flexneri 2A	yes	yes	yes, merged (original and re-sequenced reads)	yes	yes	yes	Shigella flexneri serotype 2a	2013-04-19	2013	Free State	LEJ	Stool culture	Stool	N	FEMALE	1	1 - 4	S	S	S	S	S	S	S	R	ND	1
FD01872908	ERS12564506	786430	Shigella flexneri 2A	yes	yes	yes, merged (original and re-sequenced reads)	yes	yes	yes	Shigella flexneri serotype 2a	2013-04-20	2013	Eastern Cape	NMM	Stool culture	Stool	N	MALE	0	< 1	R	R	R	R	S	S	S	R	ND	2
FD01872909	ERS12564507	812102	Shigella flexneri 2A	no	yes	Yes	yes	yes	yes	Shigella flexneri serotype 2a	2013-07-01	2013	Western Cape	CAT	Stool culture	Stool	N	MALE	64	61 - 80	R	R	R	R	S	S	S	R	ND	4
FD01872910	ERS12564508	818125	Shigella flexneri 2A	no	yes	Yes	yes	yes	yes	Shigella flexneri serotype 2a	2013-07-02	2014	KwaZulu-Natal	ETH	Stool culture	Stool	N	FEMALE	35	21 - 40	R	Unknown	Unknown	Unknown	Unknown	S	Unknown	Unknown	ND	2
FD01872911	ERS12564509	677771	Shigella flexneri 2A	no	yes	Yes	yes	yes	yes	Shigella flexneri serotype 2a	2013-07-03	2012	Free State	LEJ	Stool culture	Stool	N	FEMALE	3	1 - 4	S	S	S	S	S	S	S	R	ND	1
FD01872912	ERS12564510	703966	Shigella flexneri 2A	no	yes	Yes	yes	yes	yes	Shigella flexneri serotype 2a	2013-07-04	2012	Gauteng	SED	Stool culture	Stool	N	MALE	2	1 - 4	R	R	R	R	S	S	S	R	ND	3
FD01872913	ERS12564511	726542	Shigella flexneri 2A	no	yes	Yes	yes	yes	yes	Shigella flexneri serotype 2a	2013-07-05	2013	Free State	MOT	Stool culture	Stool	N	MALE	71	61 - 80	S	S	S	S	S	S	S	S	ND	1
FD01872914	ERS12564512	747008	Shigella flexneri 2A	yes	yes	yes, merged (original and re-sequenced reads)	yes	yes	yes	Shigella flexneri serotype 2a	2013-04-21	2013	Gauteng	WRA	Stool culture	Stool	N	MALE	1	1 - 4	R	R	R	R	S	S	S	R	ND	2
FD01872915	ERS12564513	769939	Shigella flexneri 2A	yes	yes	yes, merged (original and re-sequenced reads)	yes	yes	yes	Shigella flexneri serotype 2a	2013-04-22	2013	KwaZulu-Natal	ILE	Stool culture	Stool	N	MALE	2	1 - 4	R	R	R	R	S	S	S	S	ND	2
FD01872916	ERS12564514	787820	Shigella flexneri 2A	yes	yes	yes, merged (original and re-sequenced reads)	yes	yes	yes	Shigella flexneri serotype 2a	2013-04-23	2013	Gauteng	JBM	Stool culture	Stool	N	MALE	4	1 - 4	R	R	R	R	S	S	S	S	ND	3
FD01872917	ERS12564515	813117	Shigella flexneri 2A	yes	yes	yes, merged (original and re-sequenced reads)	yes	yes	yes	Shigella flexneri serotype 2a	2013-04-24	2013	KwaZulu-Natal	ETH	Stool culture	Stool	N	UNK	1	1 - 4	R	R	R	R	S	S	S	R	ND	2
FD01872918	ERS12564516	818497	Shigella flexneri 2A	yes	yes	yes, merged (original and re-sequenced reads)	yes	yes	yes	Shigella flexneri serotype 2a	2013-04-25	2014	Gauteng	JBM	Stool culture	Stool	N	FEMALE	1	1 - 4	R	Unknown	Unknown	Unknown	Unknown	S	Unknown	Unknown	ND	2
FD01872919	ERS12564517	679572/679574	Shigella flexneri 2A	no	yes	Yes	yes	yes	yes	Shigella flexneri serotype 2a	2013-07-06	2012	Eastern Cape	NMM	Stool culture	Stool	N	MALE	0	< 1	R	S	S	S	S	S	S	R	ND	1
FD01872920	ERS12564518	705226	Shigella flexneri 2A	no	yes	Yes	yes	yes	yes	Shigella flexneri serotype 2a	2013-07-07	2012	Eastern Cape	AMT	Stool culture	Stool	N	FEMALE	1	1 - 4	R	R	R	R	S	S	S	R	ND	2
FD01872921	ERS12564519	807703	Shigella flexneri 2A	no	yes	Yes	yes	yes	yes	Shigella flexneri serotype 2a	2013-07-08	2013	Free State	LEJ	Stool culture	Stool	N	FEMALE	63	61 - 80	S	S	S	S	S	S	S	R	ND	4
FD01872922	ERS12564520	748381	Shigella flexneri 2A	yes	yes	yes, merged (original and re-sequenced reads)	yes	yes	yes	Shigella flexneri serotype 2a	2013-02-10	2013	Gauteng	SED	Stool culture	Stool	N	MALE	2	1 - 4	S	S	S	S	S	S	S	R	ND	1
FD01872923	NA	771991	Shigella flexneri 2A	yes	yes	No	yes	yes	yes	Shigella flexneri serotype 3a	2013-04-26	2013	Mpumalanga	EAV / GSI	Fluid	VAGINAL SWAB	N	FEMALE	Unknown	Unknown	R	R	R	S	S	S	S	R	ND	ND
FD01872924	ERS12564521	793277	Shigella flexneri 2A	yes	yes	yes, merged (original and re-sequenced reads)	yes	yes	yes	Shigella flexneri serotype 2a	2013-04-27	2013	Western Cape	CAT	Stool culture	Stool	N	MALE	2	1 - 4	R	R	R	R	S	S	S	R	ND	4
FD01872925	ERS12564522	813976	Shigella flexneri 2A	yes	yes	yes, merged (original and re-sequenced reads)	yes	yes	yes	Shigella flexneri serotype 2a	2013-04-28	2013	KwaZulu-Natal	ETH	Stool culture	Stool	N	MALE	1	1 - 4	S	S	S	S	S	S	S	R	ND	1
FD01872926	ERS12564523	818891	Shigella flexneri 2A	yes	yes	yes, merged (original and re-sequenced reads)	yes	yes	yes	Shigella flexneri serotype 2a	2013-04-29	2014	Eastern Cape	NMM	Stool culture	Stool	N	FEMALE	36	21 - 40	R	Unknown	Unknown	Unknown	Unknown	S	Unknown	Unknown	ND	3
FD01872927	ERS12564524	682796	Shigella flexneri 2A	no	yes	Yes	yes	yes	yes	Shigella flexneri serotype 2a	2013-07-09	2012	Western Cape	CAT	Stool culture	Stool	N	MALE	27	21 - 40	R	R	R	S	S	S	S	R	ND	3
FD01872928	ERS12564525	707648	Shigella flexneri 2A	no	yes	Yes	yes	yes	yes	Shigella flexneri serotype 2a	2013-07-10	2012	KwaZulu-Natal	ETH	Fluid	EYE	N	FEMALE	0	< 1	R	R	R	R	S	S	S	R	ND	2
FD01872929	ERS12564526	728467	Shigella flexneri 2A	yes	yes	yes, merged (original and re-sequenced reads)	yes	yes	yes	Shigella flexneri serotype 2a	2013-04-30	2013	Western Cape	CAT	Stool culture	Stool	N	FEMALE	2	1 - 4	R	S	R	R	S	S	S	S	ND	4
FD01872930	ERS12564527	749177	Shigella flexneri 2A	yes	yes	yes, merged (original and re-sequenced reads)	yes	yes	yes	Shigella flexneri serotype 2a	2013-05-01	2013	Gauteng	EKH	Stool culture	Stool	N	MALE	Unknown	Unknown	R	R	R	R	S	S	S	R	ND	3
FD01872931	ERS12564528	773173	Shigella flexneri 2A	yes	yes	yes, merged (original and re-sequenced reads)	yes	yes	yes	Shigella flexneri serotype 2a	2013-05-02	2013	Gauteng	TSW	Stool culture	Stool	N	FEMALE	12	11 - 20	R	R	R	R	S	S	S	R	ND	3
FD01872932	ERS12564529	797647	Shigella flexneri 2A	no	yes	Yes	yes	yes	yes	Shigella flexneri serotype 2a	2013-07-11	2013	KwaZulu-Natal	ETH	Stool culture	Stool	N	MALE	1	1 - 4	S	S	S	S	S	S	S	R	ND	1
FD01872933	ERS12564530	814395	Shigella flexneri 2A	yes	yes	yes, merged (original and re-sequenced reads)	yes	yes	yes	Shigella flexneri serotype 2a	2013-02-11	2013	Western Cape	WEC	Stool culture	Stool	N	FEMALE	0	< 1	R	R	R	R	S	S	S	S	ND	2
FD01872934	ERS12564531	819076	Shigella flexneri 2A	no	yes	Yes	yes	yes	yes	Shigella flexneri serotype 2a	2013-07-12	2014	Mpumalanga	EAV / GSI	Stool culture	Stool	N	FEMALE	0	< 1	R	Unknown	Unknown	Unknown	Unknown	S	Unknown	Unknown	ND	4
FD01872935	ERS12564532	683047	Shigella flexneri 2A	yes	yes	yes, merged (original and re-sequenced reads)	yes	yes	yes	Shigella flexneri serotype 2a	2013-05-03	2012	Western Cape	CAT	Stool culture	Stool	N	FEMALE	3	1 - 4	R	R	R	R	S	S	S	R	ND	2
FD01872936	ERS12564533	708529	Shigella flexneri 2A	no	yes	Yes	yes	yes	yes	Shigella flexneri serotype 2a	2013-07-13	2012	Gauteng	JBM	Stool culture	Stool	N	FEMALE	Unknown	Unknown	S	S	S	S	S	S	S	S	ND	1
FD01872937	NA	728888	Shigella flexneri 2A	no	yes	No	yes	yes	no	EIEC	2013-07-14	2013	Mpumalanga	NKG	Stool culture	Stool	N	MALE	3	1 - 4	R	R	R	R	S	S	S	R	ND	ND
FD01872938	ERS12564534	750986	Shigella flexneri 2A	yes	yes	yes, merged (original and re-sequenced reads)	yes	yes	yes	Shigella flexneri serotype 2a	2013-05-04	2013	Gauteng	JBM	Stool culture	Stool	N	FEMALE	1	1 - 4	R	R	R	S	S	S	S	S	ND	3
FD01872939	ERS12564535	774711	Shigella flexneri 2A	yes	yes	yes, merged (original and re-sequenced reads)	yes	yes	yes	Shigella flexneri serotype 2a	2013-05-05	2013	Gauteng	TSW	Stool culture	Stool	N	FEMALE	38	21 - 40	S	S	R	R	S	S	S	R	ND	2
FD01872940	ERS12564536	800074	Shigella flexneri 2A	no	yes	Yes	yes	yes	yes	Shigella flexneri serotype 2a	2013-07-15	2013	Western Cape	CAT	Stool culture	Stool	N	FEMALE	36	21 - 40	R	R	R	R	S	S	S	S	ND	3
FD01872941	ERS12564537	814423	Shigella flexneri 2A	yes	yes	yes, merged (original and re-sequenced reads)	yes	yes	yes	Shigella flexneri serotype 2a	2013-05-06	2013	Gauteng	SED	Stool culture	Stool	N	FEMALE	58	41 - 60	R	S	R	R	S	S	S	R	ND	1
FD01872942	ERS12564538	820105	Shigella flexneri 2A	yes	yes	yes, merged (original and re-sequenced reads)	yes	yes	yes	Shigella flexneri serotype 2a	2013-02-12	2014	Gauteng	JBM	Stool culture	Stool	N	FEMALE	2	1 - 4	S	Unknown	Unknown	Unknown	Unknown	S	Unknown	Unknown	ND	3
FD01873906	ERS12564539	562730	Shigella sonnei	no	yes	Yes	yes	yes	yes	?	2014-02-02	2011	Western Cape	CAT	Stool culture	Stool	N	MALE	0	< 1	R	S	R	R	S	S	S	R	3.7.11	1
FD01873907	ERS12564540	605084	Shigella sonnei	no	yes	Yes	yes	yes	yes	Shigella sonnei, form I	2014-02-03	2011	Gauteng	SED	Stool culture	Stool	N	MALE	1	1 - 4	R	S	R	S	S	S	S	R	3.7.7	2
FD01873908	ERS12564541	626930	Shigella sonnei	no	yes	Yes	yes	yes	yes	Shigella sonnei form II	2014-02-04	2012	Gauteng	TSW	Stool culture	Stool	N	MALE	7	5 - 10	S	S	R	R	S	S	S	R	3.7.11	1
FD01873909	ERS12564542	639467	Shigella sonnei	yes	yes	yes, merged (original and re-sequenced reads)	yes	yes	yes	Shigella sonnei, form I	2013-08-10	2012	Gauteng	WRA	Stool culture	Stool	N	MALE	36	21 - 40	S	S	R	R	S	S	S	R	3.7.9	3
FD01873910	NA	648387	Shigella sonnei	no	yes	No	yes	no - <20 coverage	ND	ND	2014-01-22	2012	Eastern Cape	NMM	Stool culture	Stool	N	MALE	3	1 - 4	S	S	R	R	S	S	S	R	ND	ND
FD01873911	ERS12564543	666150	Shigella sonnei	no	yes	Yes	yes	yes	yes	Shigella sonnei, form I	2014-02-05	2012	KwaZulu-Natal	ETH	Stool culture	Stool	N	FEMALE	7	5 - 10	S	S	R	R	S	S	S	R	3.7.11	1
FD01873912	NA	688450	Shigella sonnei	no	yes	No	yes	no - <20 coverage	ND	ND	2014-01-23	2012	Gauteng	JBM	Stool culture	Stool	N	FEMALE	36	21 - 40	S	S	R	R	S	S	S	R	ND	ND
FD01873914	ERS12564544	566350	Shigella sonnei	no	yes	Yes	yes	yes	yes	Shigella sonnei, form I	2014-02-06	2011	Gauteng	EKH	Stool culture	Stool	N	MALE	55	41 - 60	S	S	R	R	S	S	S	R	3.7.11	1
FD01873915	ERS12564545	609332	Shigella sonnei	no	yes	Yes	yes	yes	yes	Shigella sonnei form II	2014-02-07	2011	Western Cape	BOL / CWI	Stool culture	Stool	N	FEMALE	80	61 - 80	S	S	R	R	S	S	S	R	3.7.9	3
FD01873916	ERS12564546	638746	Shigella sonnei	no	yes	Yes	yes	yes	yes	Shigella sonnei, form I	2014-02-08	2012	Gauteng	Unknown	Stool culture	Stool	N	MALE	Unknown	Unknown	S	S	R	R	S	S	S	R	3.7.11	1
FD01873917	ERS12564547	640156	Shigella sonnei	no	yes	Yes	yes	yes	yes	Shigella sonnei form II	2014-02-09	2012	Gauteng	SED	Stool culture	Stool	N	FEMALE	4	1 - 4	S	S	R	R	S	S	S	R	3.7.11	1
FD01873918	ERS12564548	649582	Shigella sonnei	no	yes	Yes	yes	yes	yes	Shigella sonnei, form I	2014-02-10	2012	Western Cape	CAT	Stool culture	Stool	N	MALE	5	5 - 10	S	S	R	R	S	S	S	R	3.7.9	3
FD01873919	ERS12564549	667941	Shigella sonnei	no	yes	Yes	yes	yes	yes	Shigella sonnei, form I	2014-02-11	2012	Eastern Cape	AMT	Stool culture	Stool	N	MALE	Unknown	Unknown	S	S	R	R	S	S	S	R	3.7.11	1
FD01873920	ERS12564550	691337	Shigella sonnei	no	yes	Yes	yes	yes	yes	Shigella sonnei form II	2014-02-12	2012	Free State	MOT	Stool culture	Stool	N	FEMALE	22	21 - 40	S	S	R	R	S	S	S	R	3.7.11	1
FD01873922	ERS12564551	624670	Shigella sonnei	no	yes	Yes	yes	yes	yes	Shigella sonnei, form I	2014-02-13	2011	Gauteng	JBM	Stool culture	Stool	N	FEMALE	6	5 - 10	S	S	S	S	S	S	S	S	3.7.9	3
FD01873923	ERS12564552	611875/611871/878	Shigella sonnei	no	yes	Yes	yes	yes	yes	Shigella sonnei form II	2014-02-14	2011	Gauteng	EKH	Stool culture	Stool	N	MALE	72	61 - 80	S	S	S	S	S	S	S	R	3.7.11	1
FD01873924	NA	628443	Shigella sonnei	no	yes	No	yes	no - <20 coverage	ND	ND	2014-01-24	2012	Gauteng	Unknown	Stool culture	Stool	N	FEMALE	Unknown	Unknown	R	R	R	R	S	S	S	R	ND	ND
FD01873925	ERS12564553	640697	Shigella sonnei	no	yes	Yes	yes	yes	yes	Shigella sonnei, form I	2014-02-15	2012	Gauteng	JBM	Stool culture	Stool	N	MALE	Unknown	Unknown	S	S	R	R	S	S	S	R	3.7.11	1
FD01873926	ERS12564554	650623	Shigella sonnei	no	yes	Yes	yes	yes	yes	Shigella sonnei form II	2014-02-16	2012	KwaZulu-Natal	AMJ	Stool culture	Stool	N	MALE	1	1 - 4	S	S	R	R	S	S	S	R	3.7.11	1
FD01873927	ERS12564555	669238	Shigella sonnei	yes	yes	yes, merged (original and re-sequenced reads)	yes	yes	yes	Shigella sonnei, form I	2013-08-11	2012	Eastern Cape	NMM	Stool culture	Stool	N	MALE	8	5 - 10	S	S	R	R	S	S	S	R	3.7.9	3
FD01873928	ERS12564556	692416	Shigella sonnei	no	yes	Yes	yes	yes	yes	Shigella sonnei, form I	2014-02-17	2012	Mpumalanga	EHL	Stool culture	Stool	N	FEMALE	57	41 - 60	S	S	R	R	S	S	S	R	3.7.9	3
FD01873930	ERS12564557	569272	Shigella sonnei	no	yes	Yes	yes	yes	yes	Shigella sonnei, form I	2014-02-18	2011	Gauteng	Unknown	Stool culture	Stool	N	MALE	30	21 - 40	S	S	R	R	S	S	S	R	3.7.11	1
FD01873931	ERS12564558	615371	Shigella sonnei	no	yes	Yes	yes	yes	yes	Shigella sonnei, form I	2014-02-19	2011	Gauteng	JBM	Stool culture	Stool	N	MALE	Unknown	Unknown	R	R	S	R	S	S	S	R	3.7.7	2
FD01873932	ERS12564559	629708	Shigella sonnei	no	yes	Yes	yes	yes	yes	Shigella sonnei form II	2014-02-20	2012	Gauteng	EKH	Stool culture	Stool	N	MALE	Unknown	Unknown	S	S	R	R	S	S	S	R	3.7.11	1
FD01873933	ERS12564560	641141	Shigella sonnei	no	yes	Yes	yes	yes	yes	Shigella sonnei, form I	2014-02-21	2012	Free State	MOT	Stool culture	Stool	N	FEMALE	5	5 - 10	S	S	R	R	S	S	S	R	3.7.9	3
FD01873934	ERS12564561	651910	Shigella sonnei	no	yes	Yes	yes	yes	yes	Shigella sonnei, form I	2014-02-22	2012	Eastern Cape	NMM	Stool culture	Stool	N	FEMALE	2	1 - 4	S	S	S	S	S	S	S	S	3.7.11	1
FD01873935	ERS12564562	670850	Shigella sonnei	no	yes	Yes	yes	yes	yes	Shigella sonnei form II	2014-02-23	2012	Free State	MOT	Stool culture	Stool	N	FEMALE	Unknown	Unknown	S	S	R	R	S	S	S	R	3.7.11	1
FD01873936	ERS12564563	696491	Shigella sonnei	no	yes	Yes	yes	yes	yes	Shigella sonnei, form I	2014-02-24	2012	Eastern Cape	AMT	Stool culture	Stool	N	FEMALE	12	11 - 20	S	S	R	S	S	S	S	R	3.7.9	3
FD01873938	ERS12564564	572594	Shigella sonnei	no	yes	Yes	yes	yes	yes	Shigella sonnei form II	2014-02-25	2011	Gauteng	Unknown	Stool culture	Stool	N	FEMALE	Unknown	Unknown	S	S	S	S	S	S	S	R	2.8.2	1
FD01873939	ERS12564565	624668	Shigella sonnei	no	yes	Yes	yes	yes	yes	Shigella sonnei, form I	2014-02-26	2011	Gauteng	JBM	Stool culture	Stool	N	MALE	5	5 - 10	S	S	S	S	S	S	S	S	3.7.9	3
FD01873940	ERS12564566	630443	Shigella sonnei	no	yes	Yes	yes	yes	yes	Shigella sonnei, form I	2014-02-27	2012	Gauteng	EKH	Stool culture	Stool	N	FEMALE	Unknown	Unknown	S	S	R	R	S	S	S	R	3.7.11	1
FD01873941	ERS12564567	641662	Shigella sonnei	no	yes	Yes	yes	yes	yes	Shigella sonnei form II	2014-02-28	2012	Gauteng	SED	Stool culture	Stool	N	MALE	3	1 - 4	R	S	R	R	S	S	S	R	3.7.11	1
FD01873942	ERS12564568	653707	Shigella sonnei	yes	yes	yes, merged (original and re-sequenced reads)	yes	yes	yes	Shigella sonnei form II	2013-12-09	2012	KwaZulu-Natal	ETH	Stool culture	Stool	N	FEMALE	0	< 1	S	S	R	R	S	S	S	R	3.7.11	1
FD01873943	ERS12564569	670720	Shigella sonnei	no	yes	Yes	yes	yes	yes	Shigella sonnei form II	2014-03-01	2012	Mpumalanga	EHL	Stool culture	Stool	N	FEMALE	4	1 - 4	R	R	S	R	S	S	S	R	3.7.7	2
FD01873944	ERS12564570	700746	Shigella sonnei	no	yes	Yes	yes	yes	no	Shigella sonnei form II	2014-03-02	2012	Gauteng	JBM	Stool culture	Stool	N	MALE	Unknown	Unknown	S	S	R	R	S	S	S	R	-	1
FD01873946	ERS12564571	594803	Shigella sonnei	no	yes	Yes	yes	yes	yes	Shigella sonnei form II	2014-03-03	2011	Gauteng	SED	Stool culture	Stool	N	FEMALE	Unknown	Unknown	S	S	R	R	S	S	S	R	3.7.11	1
FD01873947	ERS12564572	624595	Shigella sonnei	no	yes	Yes	yes	yes	yes	Shigella sonnei form II	2014-03-04	2011	Gauteng	JBM	Stool culture	Stool	N	MALE	Unknown	Unknown	S	S	R	R	R	S	S	R	3.7.9	3
FD01873948	ERS12564573	631273	Shigella sonnei	no	yes	Yes	yes	yes	yes	Shigella sonnei form II	2014-03-05	2012	KwaZulu-Natal	ETH	Stool culture	Stool	N	FEMALE	6	5 - 10	S	S	R	R	S	S	S	R	3.7.9	3
FD01873949	ERS12564574	641838	Shigella sonnei	yes	yes	yes, merged (original and re-sequenced reads)	yes	yes	yes	Shigella sonnei, form I	2013-08-12	2012	Eastern Cape	Unknown	Stool culture	Stool	N	MALE	31	21 - 40	S	S	R	R	S	S	S	R	3.7.9	3
FD01873950	ERS12564575	654502	Shigella sonnei	no	yes	Yes	yes	yes	yes	Shigella sonnei, form I	2014-03-06	2012	Western Cape	CAT	Stool culture	Stool	N	FEMALE	57	41 - 60	R	S	R	R	S	S	S	R	3.7.9	3
FD01873951	ERS12564576	672680	Shigella sonnei	no	yes	Yes	yes	yes	yes	Shigella sonnei, form I	2014-03-07	2012	Gauteng	JBM	Stool culture	Stool	N	FEMALE	Unknown	Unknown	S	S	R	R	S	S	S	R	3.7.11	1
FD01873952	ERS12564577	704274	Shigella sonnei	no	yes	Yes	yes	yes	yes	Shigella sonnei, form I	2014-03-08	2012	Gauteng	EKH	Stool culture	Stool	N	FEMALE	6	5 - 10	S	S	R	R	S	S	S	R	3.7.11	1
FD01873954	ERS12564578	575813	Shigella sonnei	no	yes	Yes	yes	yes	yes	Shigella sonnei form II	2014-03-09	2011	Gauteng	JBM	Stool culture	Stool	N	FEMALE	Unknown	Unknown	R	S	R	S	S	S	S	R	3.7.11	1
FD01873955	ERS12564579	624665	Shigella sonnei	no	yes	Yes	yes	yes	yes	Shigella sonnei form II	2014-03-10	2011	Gauteng	JBM	Stool culture	Stool	N	MALE	4	1 - 4	S	S	S	S	S	S	S	S	3.7.9	3
FD01873956	ERS12564580	631771	Shigella sonnei	no	yes	Yes	yes	yes	yes	Shigella sonnei form II	2014-03-11	2012	Gauteng	SED	Stool culture	Stool	N	MALE	Unknown	Unknown	S	S	R	R	S	S	S	R	3.7.11	1
FD01873957	ERS12564581	642972	Shigella sonnei	no	yes	Yes	yes	yes	yes	Shigella sonnei form II	2014-03-12	2012	Gauteng	Unknown	Stool culture	Stool	N	FEMALE	Unknown	Unknown	S	S	R	R	S	S	S	R	3.7.11	1
FD01873958	ERS12564582	655379	Shigella sonnei	no	yes	Yes	yes	yes	yes	Shigella sonnei, form I	2014-03-13	2012	Gauteng	Unknown	Stool culture	Stool	N	FEMALE	Unknown	Unknown	S	S	R	R	S	S	S	R	3.7.9	3
FD01873959	ERS12564583	674843	Shigella sonnei	no	yes	Yes	yes	yes	yes	Shigella sonnei, form I	2014-03-14	2012	Gauteng	JBM	Stool culture	Stool	N	MALE	3	1 - 4	S	S	R	R	S	S	S	R	3.7.11	1
FD01873960	NA	705826	Shigella sonnei	yes	yes	No	no - per base sequence content	ND	ND	ND	2014-01-28	2012	Eastern Cape	NMM	Stool culture	Stool	N	MALE	0	< 1	S	S	R	R	S	S	S	R	ND	ND
FD01873962	ERS12564584	579041	Shigella sonnei	no	yes	Yes	yes	yes	yes	Shigella sonnei form II	2014-03-15	2011	KwaZulu-Natal	ETH	Stool culture	Stool	N	FEMALE	Unknown	Unknown	S	S	S	S	R	S	S	S	3.6.1	2
FD01873963	ERS12564585	624907	Shigella sonnei	no	yes	Yes	yes	yes	yes	Shigella sonnei, form I	2014-03-16	2011	Western Cape	CAT	Stool culture	Stool	N	MALE	1	1 - 4	R	S	S	S	S	S	S	R	3.7.7	2
FD01873964	ERS12564586	633975	Shigella sonnei	yes	yes	yes, merged (original and re-sequenced reads)	yes	yes	yes	Shigella sonnei form II	2013-12-10	2012	Western Cape	CAT	Stool culture	Stool	N	FEMALE	1	1 - 4	S	S	R	R	S	S	S	R	3.7.9	3
FD01873965	ERS12564587	643855	Shigella sonnei	yes	yes	yes, merged (original and re-sequenced reads)	yes	yes	yes	Shigella sonnei form II	2013-08-13	2012	Eastern Cape	AMT	Stool culture	Stool	N	FEMALE	4	1 - 4	S	S	R	R	S	S	S	R	3.7.9	3
FD01873966	ERS12564588	656554	Shigella sonnei	yes	yes	yes, merged (original and re-sequenced reads)	yes	yes	yes	Shigella sonnei form II	2013-08-14	2012	Gauteng	JBM	Stool culture	Stool	N	FEMALE	Unknown	Unknown	S	S	R	R	S	S	S	R	3.7.11	1
FD01873967	ERS12564589	676073	Shigella sonnei	yes	yes	yes, merged (original and re-sequenced reads)	yes	yes	yes	Shigella sonnei form II	2013-11-23	2012	Gauteng	JBM	Stool culture	Stool	N	FEMALE	Unknown	Unknown	R	S	R	R	S	S	S	R	3.7.11	1
FD01873968	ERS12564590	705955	Shigella sonnei	no	yes	Yes	yes	yes	yes	Shigella sonnei form II	2014-03-17	2012	Mpumalanga	EHL	Stool culture	Stool	N	FEMALE	49	41 - 60	S	S	R	R	S	S	S	R	3.7.11	1
FD01873970	ERS12564591	582898	Shigella sonnei	no	yes	Yes	yes	yes	yes	Shigella sonnei form II	2014-03-18	2011	Western Cape	CAT	Stool culture	Stool	N	MALE	13	11 - 20	S	S	R	R	S	S	S	R	3.7.11	1
FD01873971	ERS12564592	631272	Shigella sonnei	no	yes	Yes	yes	yes	yes	Shigella sonnei, form I	2014-03-19	2011	KwaZulu-Natal	ETH	Stool culture	Stool	N	FEMALE	22	21 - 40	S	S	R	R	S	S	S	R	3.7.11	1
FD01873972	ERS12564593	635513	Shigella sonnei	yes	yes	yes, merged (original and re-sequenced reads)	yes	yes	yes	Shigella sonnei form II	2013-11-24	2012	Gauteng	JBM	Stool culture	Stool	N	MALE	39	21 - 40	S	S	R	R	S	S	S	R	3.7.11	1
FD01873973	ERS12564594	645079	Shigella sonnei	no	yes	Yes	yes	yes	yes	Shigella sonnei, form I	2014-03-20	2012	Gauteng	JBM	Stool culture	Stool	N	MALE	Unknown	Unknown	R	S	R	R	S	S	R	R	3.7.9	3
FD01873974	ERS12564595	658572	Shigella sonnei	yes	yes	yes, merged (original and re-sequenced reads)	yes	yes	yes	Shigella sonnei, form I	2013-12-11	2012	Gauteng	JBM	Stool culture	Stool	N	FEMALE	Unknown	Unknown	S	S	R	R	S	S	S	R	3.7.9	3
FD01873975	ERS12564596	677871	Shigella sonnei	no	yes	Yes	yes	yes	yes	Shigella sonnei form II	2014-03-21	2012	Gauteng	JBM	Stool culture	Stool	N	FEMALE	8	5 - 10	R	S	R	R	S	S	S	R	3.7.9	3
FD01873976	ERS12564597	707666	Shigella sonnei	no	yes	Yes	yes	yes	yes	Shigella sonnei form II	2014-03-22	2012	KwaZulu-Natal	ETH	Stool culture	Stool	N	FEMALE	1	1 - 4	S	S	R	R	S	S	S	R	3.7.11	1
FD01873978	ERS12564598	584381	Shigella sonnei	no	yes	Yes	yes	yes	yes	Shigella sonnei form II	2014-03-23	2011	Western Cape	Unknown	Stool culture	Stool	N	MALE	18	11 - 20	S	S	R	R	S	S	S	R	3.7.11	1
FD01873979	ERS12564599	631312	Shigella sonnei	no	yes	Yes	yes	yes	yes	Shigella sonnei, form I	2014-03-24	2011	KwaZulu-Natal	Unknown	Stool culture	Stool	N	FEMALE	8	5 - 10	S	S	R	R	R	S	S	R	3.7.9	3
FD01873980	ERS12564600	636501	Shigella sonnei	no	yes	Yes	yes	yes	yes	Shigella sonnei, form I	2014-08-18	2012	Gauteng	JBM	Blood culture	Stool	Y	MALE	Unknown	Unknown	R	R	S	R	S	S	S	R	3.7.7	2
FD01873981	NA	661887	Shigella sonnei	yes	yes	No	yes	yes	yes	No prediction (multiple wzx)	2013-12-12	2012	Gauteng	TSW	Stool culture	Stool	N	FEMALE	1	1 - 4	S	S	S	S	S	S	S	S	ND	ND
FD01873982	ERS12564601	659153	Shigella sonnei	no	yes	Yes	yes	yes	yes	Shigella sonnei, form I	2014-03-25	2012	Gauteng	JBM	Stool culture	Stool	N	MALE	Unknown	Unknown	S	S	R	R	S	S	S	R	2.8.2	2
FD01873983	ERS12564602	679131	Shigella sonnei	no	yes	Yes	yes	yes	yes	Shigella sonnei form II	2014-03-26	2012	Gauteng	EKH	Stool culture	Stool	N	FEMALE	4	1 - 4	R	S	R	R	S	S	S	R	3.7.9	3
FD01873986	ERS12564603	585719	Shigella sonnei	no	yes	Yes	yes	yes	yes	Shigella sonnei form II	2014-03-27	2011	Gauteng	TSW	Stool culture	Stool	N	FEMALE	Unknown	Unknown	S	S	R	R	S	S	S	R	3.7.11	1
FD01873987	ERS12564604	638722	Shigella sonnei	no	yes	Yes	yes	yes	yes	Shigella sonnei, form I	2014-03-28	2012	Gauteng	JBM	Stool culture	Stool	N	MALE	Unknown	Unknown	R	R	S	R	S	S	S	R	3.7.7	2
FD01873988	ERS12564605	636726	Shigella sonnei	no	yes	Yes	yes	yes	yes	Shigella sonnei, form I	2014-03-29	2012	Gauteng	SED	Stool culture	Stool	N	FEMALE	14	11 - 20	S	S	R	R	S	S	S	R	3.7.7	2
FD01873989	NA	646161	Shigella sonnei	no	yes	No	yes	no - <20 coverage	ND	ND	2014-01-25	2012	Gauteng	JBM	Stool culture	Stool	N	FEMALE	Unknown	Unknown	S	S	R	R	S	S	S	R	ND	ND
FD01873990	ERS12564606	659952	Shigella sonnei	no	yes	Yes	yes	yes	yes	Shigella sonnei, form I	2014-03-30	2012	Gauteng	EKH	Stool culture	Stool	N	FEMALE	Unknown	Unknown	R	S	S	S	S	S	S	R	3.7.11	1
FD01873991	ERS12564607	680976	Shigella sonnei	no	yes	Yes	yes	yes	yes	Shigella sonnei, form I	2014-03-31	2012	Western Cape	CAT	Stool culture	Stool	N	FEMALE	1	1 - 4	S	S	R	R	S	S	S	R	3.7.9	3
FD01873994	ERS12564608	596189	Shigella sonnei	yes	yes	yes, merged (original and re-sequenced reads)	yes	yes	yes	Shigella sonnei, form I	2013-11-25	2011	Gauteng	TSW	Stool culture	Stool	N	FEMALE	Unknown	Unknown	S	S	R	R	S	S	S	R	3.7.11	1
FD01873995	ERS12564609	626072	Shigella sonnei	no	yes	Yes	yes	yes	yes	Shigella sonnei form II	2014-04-01	2012	Gauteng	TSW	Stool culture	Stool	N	FEMALE	40	21 - 40	S	S	R	R	S	S	S	R	3.7.11	1
FD01873996	ERS12564610	637774	Shigella sonnei	no	yes	Yes	yes	yes	yes	Shigella sonnei form II	2014-04-02	2012	Western Cape	GRO / EDE	Stool culture	Stool	N	MALE	7	5 - 10	S	S	R	R	S	S	S	R	3.7.11	1
FD01873997	NA	646512	Shigella sonnei	yes	yes	No	no - per base sequence content	ND	ND	ND	2014-01-29	2012	Gauteng	EKH	Stool culture	Stool	N	MALE	Unknown	Unknown	S	S	R	R	S	S	S	R	ND	ND
FD01873998	ERS12564611	664818	Shigella sonnei	no	yes	Yes	yes	yes	yes	Shigella sonnei, form I	2014-04-03	2012	Gauteng	MET	Stool culture	Stool	N	MALE	8	5 - 10	S	R	R	R	S	S	S	R	3.7.11	1
FD01873999	ERS12564612	682992	Shigella sonnei	no	yes	Yes	yes	yes	yes	Shigella sonnei form II	2014-04-04	2012	Western Cape	CAT	Stool culture	Stool	N	UNK	3	1 - 4	S	S	S	S	S	S	S	S	3.7.9	3
FD01874098	ERS12564613	759331	Shigella sonnei	no	yes	Yes	yes	yes	yes	Shigella sonnei form II	2014-04-05	2013	Gauteng	TSW	Stool culture	Stool	N	MALE	38	21 - 40	R	S	R	R	S	S	S	R	3.7.9	3
FD01874099	ERS12564614	802973	Shigella sonnei	no	yes	Yes	yes	yes	yes	Shigella sonnei form II	2014-04-06	2013	Gauteng	JBM	Stool culture	Stool	N	MALE	Unknown	Unknown	R	S	S	S	S	S	S	R	3.7.9	3
FD01874100	ERS12564615	818297	Shigella sonnei	no	yes	Yes	yes	yes	yes	Shigella sonnei form II	2014-04-07	2014	North West	BOP	Stool culture	Stool	N	FEMALE	32	21 - 40	S	Unknown	S	Unknown	Unknown	S	Unknown	Unknown	3.7.7	2
FD01874101	ERS12564616	825845	Shigella sonnei	no	yes	Yes	yes	yes	yes	Shigella sonnei, form I	2014-04-08	2014	Gauteng	JBM	Stool culture	Stool	N	FEMALE	Unknown	Unknown	Unknown	Unknown	Unknown	Unknown	Unknown	Unknown	Unknown	Unknown	3.7.11	1
FD01874102	ERS12564617	832670	Shigella sonnei	no	yes	Yes	yes	yes	yes	Shigella sonnei form II	2014-04-09	2014	Free State	MOT	Stool culture	Stool	N	FEMALE	4	1 - 4	Unknown	Unknown	Unknown	Unknown	Unknown	Unknown	Unknown	Unknown	3.7.11	1
FD01874103	ERS12564618	837055	Shigella sonnei	no	yes	Yes	yes	yes	yes	Shigella sonnei form II	2014-04-10	2014	Eastern Cape	NMM	Stool culture	Stool	N	MALE	4	1 - 4	Unknown	Unknown	Unknown	Unknown	Unknown	Unknown	Unknown	Unknown	3.7.9	3
FD01874104	ERS12564619	538594	Shigella sonnei	no	yes	Yes	yes	yes	yes	Shigella sonnei, form I	2014-04-11	2011	Gauteng	JBM	Urine culture	Stool	N	FEMALE	Unknown	Unknown	S	S	R	R	S	S	S	R	3.7.7	2
FD01874105	ERS12564620	542151	Shigella sonnei	no	yes	Yes	yes	yes	yes	Shigella sonnei form II	2014-04-12	2011	Gauteng	Unknown	Stool culture	Stool	N	MALE	Unknown	Unknown	S	S	S	S	S	S	S	R	2.8.2	4
FD01874106	ERS12564621	761585	Shigella sonnei	no	yes	Yes	yes	yes	yes	Shigella sonnei form II	2014-04-13	2013	Gauteng	EKH	Stool culture	Stool	N	FEMALE	8	5 - 10	S	I	S	S	S	S	S	R	3.7.11	1
FD01874107	ERS12564622	810710	Shigella sonnei	no	yes	Yes	yes	yes	yes	Shigella sonnei form II	2014-04-14	2013	Eastern Cape	NMM	Stool culture	Stool	N	FEMALE	63	61 - 80	S	S	R	R	S	S	S	R	3.7.11	1
FD01874108	ERS12564623	818317	Shigella sonnei	yes	yes	yes, merged (original and re-sequenced reads)	yes	yes	yes	Shigella sonnei form II	2013-12-13	2014	Gauteng	JBM	Stool culture	Stool	N	MALE	3	1 - 4	Unknown	Unknown	Unknown	Unknown	Unknown	Unknown	Unknown	Unknown	3.7.11	1
FD01874109	ERS12564624	826206	Shigella sonnei	yes	yes	yes, merged (original and re-sequenced reads)	yes	yes	yes	Shigella sonnei form II	2013-12-14	2014	Western Cape	CAT	Stool culture	Stool	N	FEMALE	4	1 - 4	S	Unknown	Unknown	Unknown	Unknown	S	Unknown	Unknown	3.7.9	3
FD01874110	ERS12564625	832910	Shigella sonnei	no	yes	Yes	yes	yes	yes	Shigella sonnei form II	2014-04-15	2014	Gauteng	JBM	Stool culture	Stool	N	MALE	12	11 - 20	Unknown	Unknown	Unknown	Unknown	Unknown	Unknown	Unknown	Unknown	3.7.9	3
FD01874111	ERS12564626	839332	Shigella sonnei	no	yes	Yes	yes	yes	yes	Shigella sonnei, form I	2014-04-16	2014	Western Cape	CAT	Stool culture	Stool	N	MALE	33	21 - 40	S	Unknown	Unknown	Unknown	Unknown	S	Unknown	Unknown	3.7.9	3
FD01874112	NA	534413	Shigella sonnei	no	yes	No	yes	no - <20 coverage	ND	ND	2014-01-26	2011	Gauteng	EKH	Stool culture	Stool	N	MALE	Unknown	Unknown	R	S	R	R	S	S	S	R	ND	ND
FD01874113	ERS12564627	544465	Shigella sonnei	no	yes	Yes	yes	yes	yes	Shigella sonnei, form I	2014-04-17	2011	Western Cape	CAT	Stool culture	Stool	N	MALE	1	1 - 4	S	S	R	R	S	S	S	R	3.7.11	1
FD01874114	ERS12564628	767054	Shigella sonnei	yes	yes	yes, merged (original and re-sequenced reads)	yes	yes	yes	Shigella sonnei form II	2013-12-15	2013	Mpumalanga	EHL	Stool culture	Stool	N	MALE	0	< 1	R	S	R	R	S	S	R	R	3.7.11	1
FD01874115	ERS12564629	813217	Shigella sonnei	no	yes	Yes	yes	yes	yes	Shigella sonnei form II	2014-08-19	2013	Gauteng	JBM	Blood culture	Stool	Y	FEMALE	0	< 1	S	S	S	S	S	S	S	R	2.8.2	4
FD01874116	ERS12564630	835456	Shigella sonnei	yes	yes	yes, merged (original and re-sequenced reads)	yes	yes	yes	Shigella sonnei, form I	2013-12-16	2014	Eastern Cape	NMM	Stool culture	Stool	N	FEMALE	7	5 - 10	Unknown	Unknown	Unknown	Unknown	Unknown	Unknown	Unknown	Unknown	3.7.9	3
FD01874117	ERS12564631	827138	Shigella sonnei	no	yes	Yes	yes	yes	yes	Shigella sonnei form II	2014-04-18	2014	KwaZulu-Natal	UMG	Stool culture	Stool	N	FEMALE	27	21 - 40	R	Unknown	Unknown	Unknown	Unknown	S	Unknown	Unknown	3.7.9	3
FD01874118	ERS12564632	833192	Shigella sonnei	yes	yes	yes, merged (original and re-sequenced reads)	yes	yes	yes	Shigella sonnei form II	2013-12-17	2014	Gauteng	EKH	Stool culture	Stool	N	MALE	Unknown	Unknown	Unknown	Unknown	Unknown	Unknown	Unknown	Unknown	Unknown	Unknown	3.7.11	1
FD01874119	ERS12564633	839493	Shigella sonnei	no	yes	Yes	yes	yes	yes	Shigella sonnei form II	2014-04-19	2014	Gauteng	JBM	Stool culture	Stool	N	MALE	14	11 - 20	Unknown	Unknown	Unknown	Unknown	Unknown	Unknown	Unknown	Unknown	3.7.11	1
FD01874120	ERS12564634	536096	Shigella sonnei	no	yes	Yes	yes	yes	yes	Shigella sonnei, form I	2014-04-20	2011	Eastern Cape	AMT	Stool culture	Stool	N	FEMALE	Unknown	Unknown	S	S	S	S	S	S	S	R	2.8.2	4
FD01874121	ERS12564635	544462	Shigella sonnei	no	yes	Yes	yes	yes	yes	Shigella sonnei form II	2014-04-21	2011	Western Cape	CAT	Stool culture	Stool	N	FEMALE	2	1 - 4	S	S	R	R	S	S	S	R	3.7.11	1
FD01874122	NA	768375	Shigella sonnei	yes	yes	No	no - per base sequence content	ND	ND	ND	2014-01-30	2013	Gauteng	TSW	Stool culture	Stool	N	MALE	1	1 - 4	R	S	R	R	S	S	S	R	ND	ND
FD01874123	ERS12564636	813897	Shigella sonnei	no	yes	Yes	yes	yes	yes	Shigella sonnei form II	2014-04-22	2013	Gauteng	JBM	Stool culture	Stool	N	FEMALE	Unknown	Unknown	S	S	R	R	S	S	S	R	3.7.9	3
FD01874124	ERS12564637	818286	Shigella sonnei	yes	yes	yes, merged (original and re-sequenced reads)	yes	yes	yes	Shigella sonnei, form I	2013-12-18	2014	Gauteng	TSW	Stool culture	Stool	N	MALE	2	1 - 4	Unknown	Unknown	Unknown	Unknown	Unknown	Unknown	Unknown	Unknown	3.7.11	1
FD01874125	ERS12564638	827645	Shigella sonnei	yes	yes	yes, merged (original and re-sequenced reads)	yes	yes	yes	Shigella sonnei, form I	2013-12-19	2014	Gauteng	EKH	Stool culture	Stool	N	MALE	1	1 - 4	R	Unknown	Unknown	Unknown	Unknown	S	Unknown	Unknown	3.7.11	1
FD01874126	ERS12564639	833378	Shigella sonnei	yes	yes	yes, merged (original and re-sequenced reads)	yes	yes	yes	Shigella sonnei form II	2013-12-20	2014	Free State	LEJ	Stool culture	Stool	N	FEMALE	56	41 - 60	R	Unknown	Unknown	Unknown	Unknown	S	Unknown	Unknown	3.7.9	3
FD01874127	ERS12564640	840929	Shigella sonnei	no	yes	Yes	yes	yes	yes	Shigella sonnei form II	2014-04-23	2014	Gauteng	TSW	Stool culture	Stool	N	MALE	5	5 - 10	S	Unknown	Unknown	Unknown	Unknown	S	Unknown	Unknown	3.7.11	1
FD01874128	ERS12564641	536331	Shigella sonnei	no	yes	Yes	yes	yes	yes	Shigella sonnei form II	2014-04-24	2011	Eastern Cape	AMT	Stool culture	Stool	N	MALE	0	< 1	S	S	R	R	S	S	S	R	3.7.9	3
FD01874129	ERS12564642	545740	Shigella sonnei	no	yes	Yes	yes	yes	yes	Shigella sonnei form II	2014-04-25	2011	Gauteng	TSW	Stool culture	Stool	N	FEMALE	1	1 - 4	R	R	R	R	S	S	S	R	3.7.7	2
FD01874130	ERS12564643	770923	Shigella sonnei	yes	yes	yes, merged (original and re-sequenced reads)	yes	yes	yes	Shigella sonnei form II	2013-12-21	2013	Gauteng	TSW	Stool culture	Stool	N	MALE	2	1 - 4	S	S	S	S	S	S	S	R	3.7.9	3
FD01874131	ERS12564644	815956	Shigella sonnei	yes	yes	yes, merged (original and re-sequenced reads)	yes	yes	yes	Shigella sonnei, form I	2013-12-22	2013	Gauteng	JBM	Stool culture	Stool	N	MALE	Unknown	Unknown	S	S	R	R	S	S	S	R	3.7.11	1
FD01874132	ERS12564645	819035	Shigella sonnei	yes	yes	yes, merged (original and re-sequenced reads)	yes	yes	yes	Shigella sonnei form II	2013-12-23	2014	Gauteng	JBM	Stool culture	Stool	N	FEMALE	59	41 - 60	S	Unknown	Unknown	Unknown	Unknown	S	Unknown	Unknown	3.7.11	1
FD01874133	ERS12564646	827795	Shigella sonnei	no	yes	Yes	yes	yes	yes	Shigella sonnei, form I	2014-04-26	2014	Gauteng	JBM	Stool culture	Stool	N	FEMALE	Unknown	Unknown	Unknown	Unknown	Unknown	Unknown	Unknown	Unknown	Unknown	Unknown	3.7.9	3
FD01874134	ERS12564647	833757	Shigella sonnei	yes	yes	yes, merged (original and re-sequenced reads)	yes	yes	yes	Shigella sonnei, form I	2013-12-24	2014	Western Cape	CAT	Stool culture	Stool	N	MALE	13	11 - 20	Unknown	Unknown	Unknown	Unknown	Unknown	Unknown	Unknown	Unknown	3.7.9	3
FD01874135	ERS12564648	842544	Shigella sonnei	no	yes	Yes	yes	yes	yes	Shigella sonnei form II	2014-04-27	2014	Gauteng	EKH	Stool culture	Stool	N	FEMALE	5	5 - 10	S	Unknown	Unknown	Unknown	Unknown	S	Unknown	Unknown	3.7.9	3
FD01874136	ERS12564649	536861	Shigella sonnei	no	yes	Yes	yes	yes	yes	Shigella sonnei, form I	2014-04-28	2011	Gauteng	TSW	Stool culture	Stool	N	FEMALE	2	1 - 4	S	S	R	R	S	S	S	R	3.7.11	1
FD01874137	ERS12564650	546028	Shigella sonnei	yes	yes	yes, merged (original and re-sequenced reads)	yes	yes	yes	Shigella sonnei form II	2013-11-26	2011	Gauteng	JBM	Stool culture	Stool	N	MALE	Unknown	Unknown	S	S	R	R	S	S	S	R	3.7.11	1
FD01874138	ERS12564651	772482	Shigella sonnei	yes	yes	yes, merged (original and re-sequenced reads)	yes	yes	yes	Shigella sonnei, form I	2013-12-25	2013	Gauteng	JBM	Stool culture	Stool	N	FEMALE	28	21 - 40	R	S	R	R	S	S	S	R	3.7.9	3
FD01874139	ERS12564652	816457	Shigella sonnei	yes	yes	yes, merged (original and re-sequenced reads)	yes	yes	yes	Shigella sonnei form II	2013-12-26	2013	Eastern Cape	AMT	Stool culture	Stool	N	FEMALE	27	21 - 40	S	S	R	R	S	S	S	R	3.7.9	3
FD01874140	ERS12564653	819132	Shigella sonnei	yes	yes	yes, merged (original and re-sequenced reads)	yes	yes	yes	Shigella sonnei, form I	2013-12-27	2014	Western Cape	CAT	Stool culture	Stool	N	MALE	50	41 - 60	R	Unknown	Unknown	Unknown	Unknown	S	Unknown	Unknown	3.7.9	3
FD01874141	ERS12564654	828915	Shigella sonnei	no	yes	Yes	yes	yes	yes	Shigella sonnei form II	2014-04-29	2014	North West	SOU / KKA	Stool culture	Stool	N	FEMALE	1	1 - 4	Unknown	Unknown	Unknown	Unknown	Unknown	Unknown	Unknown	Unknown	3.7.11	1
FD01874142	ERS12564655	833771	Shigella sonnei	no	yes	Yes	yes	yes	yes	Shigella sonnei form II	2014-04-30	2014	Western Cape	WEC	Stool culture	Stool	N	MALE	2	1 - 4	Unknown	Unknown	Unknown	Unknown	Unknown	Unknown	Unknown	Unknown	3.7.9	3
FD01874143	ERS12564656	526837	Shigella sonnei	no	yes	Yes	yes	yes	yes	Shigella sonnei form II	2014-05-01	2011	Eastern Cape	AMT	Stool culture	Stool	N	FEMALE	57	41 - 60	S	S	R	R	S	S	S	R	3.7.11	1
FD01874144	ERS12564657	537588	Shigella sonnei	no	yes	Yes	yes	yes	yes	Shigella sonnei, form I	2014-05-02	2011	Gauteng	JBM	Stool culture	Stool	N	MALE	Unknown	Unknown	S	S	R	R	S	S	S	R	3.7.11	1
FD01874145	ERS12564658	546782	Shigella sonnei	no	yes	Yes	yes	yes	yes	Shigella sonnei form II	2014-05-03	2011	Gauteng	EKH	Stool culture	Stool	N	MALE	2	1 - 4	S	S	S	S	S	S	S	S	3.7.11	1
FD01874146	ERS12564659	773318	Shigella sonnei	no	yes	Yes	yes	yes	yes	Shigella sonnei, form I	2014-05-04	2013	Gauteng	JBM	Stool culture	Stool	N	FEMALE	39	21 - 40	S	S	R	R	S	S	S	R	3.7.7	2
FD01874147	ERS12564660	816768	Shigella sonnei	no	yes	Yes	yes	yes	yes	Shigella sonnei, form I	2014-05-05	2014	Eastern Cape	NMM	Stool culture	Stool	N	MALE	4	1 - 4	R	Unknown	Unknown	Unknown	Unknown	S	Unknown	Unknown	3.7.9	3
FD01874148	ERS12564661	819690	Shigella sonnei	no	yes	Yes	yes	yes	yes	Shigella sonnei form II	2014-05-06	2014	Gauteng	TSW	Stool culture	Stool	N	FEMALE	3	1 - 4	R	Unknown	Unknown	Unknown	Unknown	S	Unknown	Unknown	2.8.2	2
FD01874149	ERS12564662	829321	Shigella sonnei	no	yes	Yes	yes	yes	yes	Shigella sonnei form II	2014-05-07	2014	Gauteng	JBM	Stool culture	Stool	N	MALE	Unknown	Unknown	S	Unknown	Unknown	Unknown	Unknown	S	Unknown	Unknown	3.7.9	3
FD01874150	ERS12564663	834141	Shigella sonnei	yes	yes	yes, merged (original and re-sequenced reads)	yes	yes	yes	Shigella sonnei form II	2013-12-28	2014	Gauteng	JBM	Stool culture	Stool	N	MALE	Unknown	Unknown	Unknown	Unknown	Unknown	Unknown	Unknown	Unknown	Unknown	Unknown	3.7.11	1
FD01874151	ERS12564664	527867	Shigella sonnei	no	yes	Yes	yes	yes	yes	Shigella sonnei form II	2014-05-08	2011	Western Cape	CAT	Stool culture	Stool	N	MALE	10	5 - 10	S	S	R	R	S	S	S	R	3.7.9	3
FD01874152	ERS12564665	538145	Shigella sonnei	no	yes	Yes	yes	yes	yes	Shigella sonnei, form I	2014-05-09	2011	Gauteng	TSW	Stool culture	Stool	N	FEMALE	21	21 - 40	S	S	R	R	S	S	S	R	3.7.11	1
FD01874153	NA	547315	Shigella sonnei	yes	yes	No	yes	yes	yes	Shigella sonnei (low levels of form I)	2013-11-27	2011	Western Cape	OVE	Stool culture	Stool	N	UNKNOWN	27	21 - 40	R	R	R	R	S	S	S	R	?	?
FD01874154	NA	774472	Shigella sonnei	yes	yes	No	no - per base sequence content	ND	ND	ND	2014-01-31	2013	Eastern Cape	NMM	Stool culture	Stool	N	FEMALE	2	1 - 4	S	S	R	R	S	S	S	R	ND	ND
FD01874155	ERS12564666	816775	Shigella sonnei	yes	yes	yes, merged (original and re-sequenced reads)	yes	yes	yes	Shigella sonnei form II	2013-12-29	2014	Gauteng	TSW	Stool culture	Stool	N	FEMALE	26	21 - 40	S	Unknown	Unknown	Unknown	Unknown	S	Unknown	Unknown	3.7.9	3
FD01874156	ERS12564667	820176	Shigella sonnei	no	yes	Yes	yes	yes	yes	Shigella sonnei form II	2014-05-10	2014	Eastern Cape	NMM	Stool culture	Stool	N	MALE	1	1 - 4	R	Unknown	Unknown	Unknown	Unknown	S	Unknown	Unknown	3.7.11	1
FD01874157	ERS12564668	829566	Shigella sonnei	yes	yes	yes, merged (original and re-sequenced reads)	yes	yes	yes	Shigella sonnei form II	2013-12-30	2014	Gauteng	JBM	Stool culture	Stool	N	MALE	10	5 - 10	S	Unknown	Unknown	Unknown	Unknown	S	Unknown	Unknown	3.7.11	1
FD01874158	ERS12564669	834993	Shigella sonnei	yes	yes	yes, merged (original and re-sequenced reads)	yes	yes	yes	Shigella sonnei, form I	2013-12-31	2014	Gauteng	JBM	Stool culture	Stool	N	MALE	32	21 - 40	S	Unknown	Unknown	Unknown	Unknown	S	Unknown	Unknown	3.7.9	3
FD01874159	ERS12564670	525478	Shigella sonnei	yes	yes	yes, merged (original and re-sequenced reads)	yes	yes	yes	Shigella sonnei form II	2014-01-01	2011	Gauteng	Unknown	Stool culture	Stool	N	MALE	Unknown	Unknown	S	S	R	R	S	S	S	R	3.6.0	2
FD01874160	ERS12564671	538226	Shigella sonnei	no	yes	Yes	yes	yes	yes	Shigella sonnei (low levels of form I)	2014-05-11	2011	Gauteng	TSW	Stool culture	Stool	N	MALE	1	1 - 4	S	S	R	R	S	S	S	R	3.7.11	1
FD01874161	ERS12564672	547822	Shigella sonnei	yes	yes	yes, merged (original and re-sequenced reads)	yes	yes	yes	Shigella sonnei form II	2013-11-28	2011	Gauteng	JBM	Stool culture	Stool	N	FEMALE	11	11 - 20	S	S	R	R	S	S	S	R	3.7.11	1
FD01874162	ERS12564673	784924	Shigella sonnei	no	yes	Yes	yes	yes	yes	Shigella sonnei form II	2014-05-12	2013	Eastern Cape	NMM	Stool culture	Stool	N	MALE	3	1 - 4	S	S	R	R	S	S	S	R	3.7.9	3
FD01874163	ERS12564674	816848	Shigella sonnei	no	yes	Yes	yes	yes	yes	Shigella sonnei form II	2014-05-13	2014	Gauteng	JBM	Stool culture	Stool	N	FEMALE	2	1 - 4	R	Unknown	Unknown	Unknown	Unknown	S	Unknown	Unknown	3.7.11	1
FD01874164	ERS12564675	820763	Shigella sonnei	yes	yes	yes, merged (original and re-sequenced reads)	yes	yes	yes	Shigella sonnei form II	2014-01-02	2014	Eastern Cape	NMM	Stool culture	Stool	N	FEMALE	4	1 - 4	R	Unknown	Unknown	Unknown	Unknown	S	Unknown	Unknown	3.7.9	3
FD01874165	ERS12564676	837919	Shigella sonnei	no	yes	Yes	yes	yes	yes	Shigella sonnei, form I	2014-05-14	2014	Gauteng	TSW	Stool culture	Stool	N	MALE	3	1 - 4	S	Unknown	Unknown	Unknown	Unknown	S	Unknown	Unknown	3.7.9	3
FD01874166	ERS12564677	833784	Shigella sonnei	no	yes	Yes	yes	yes	yes	Shigella sonnei form II	2014-05-15	2014	KwaZulu-Natal	UMG	Stool culture	Stool	N	FEMALE	0	< 1	S	Unknown	Unknown	Unknown	Unknown	S	Unknown	Unknown	3.7.9	3
FD01874167	ERS12564678	529715	Shigella sonnei	yes	yes	yes, merged (original and re-sequenced reads)	yes	yes	yes	Shigella sonnei form II	2014-01-03	2011	Gauteng	Unknown	Stool culture	Stool	N	FEMALE	22	21 - 40	S	S	S	S	S	S	S	S	3.7.11	1
FD01874168	ERS12564679	539178	Shigella sonnei	no	yes	Yes	yes	yes	yes	Shigella sonnei form II	2014-05-16	2011	Gauteng	JBM	Stool culture	Stool	N	FEMALE	Unknown	Unknown	S	S	R	R	S	S	S	R	3.7.11	1
FD01874169	ERS12564680	550796	Shigella sonnei	no	yes	Yes	yes	yes	yes	Shigella sonnei form II	2014-05-17	2011	Western Cape	CAT	Stool culture	Stool	N	MALE	1	1 - 4	S	S	R	R	S	S	S	R	3.7.7	2
FD01874170	ERS12564681	786423	Shigella sonnei	no	yes	Yes	yes	yes	yes	Shigella sonnei form II	2014-05-18	2013	Eastern Cape	NMM	Stool culture	Stool	N	MALE	4	1 - 4	S	S	R	R	S	S	S	R	3.7.9	3
FD01874171	ERS12564682	817613	Shigella sonnei	yes	yes	yes, merged (original and re-sequenced reads)	yes	yes	yes	Shigella sonnei (low levels of form I)	2014-01-04	2014	Gauteng	JBM	Stool culture	Stool	N	MALE	4	1 - 4	S	Unknown	Unknown	Unknown	Unknown	S	Unknown	Unknown	3.7.9	3
FD01874172	ERS12564683	821125	Shigella sonnei	yes	yes	yes, merged (original and re-sequenced reads)	yes	yes	yes	Shigella sonnei form II	2014-01-05	2014	KwaZulu-Natal	ETH	Stool culture	Stool	N	MALE	3	1 - 4	Unknown	Unknown	Unknown	Unknown	Unknown	Unknown	Unknown	Unknown	3.7.11	1
FD01874173	NA	830880	Shigella sonnei	yes	yes	No	yes	no - <20 coverage	ND	ND	2014-02-01	2014	Gauteng	JBM	Stool culture	Stool	N	MALE	Unknown	Unknown	R	Unknown	Unknown	Unknown	Unknown	S	Unknown	Unknown	ND	ND
FD01874174	ERS12564684	836359/836361	Shigella sonnei	no	yes	Yes	yes	yes	yes	Shigella sonnei form II	2014-05-19	2014	Western Cape	CAT	Stool culture	Stool	N	MALE	34	21 - 40	R	Unknown	Unknown	Unknown	Unknown	S	Unknown	Unknown	3.7.11	1
FD01874175	ERS12564685	530739	Shigella sonnei	no	yes	Yes	yes	yes	yes	Shigella sonnei form II	2014-05-20	2011	Gauteng	Unknown	Stool culture	Stool	N	MALE	48	41 - 60	S	S	R	R	S	S	S	R	3.7.9	3
FD01874176	ERS12564686	567787	Shigella sonnei	no	yes	Yes	yes	yes	yes	Shigella sonnei form II	2014-05-21	2011	KwaZulu-Natal	ETH	Stool culture	Stool	N	FEMALE	1	1 - 4	S	S	R	R	S	S	S	R	3.7.11	1
FD01874177	NA	554176	Shigella sonnei	no	no	No	no - ND	ND	ND	ND	2014-01-17	2011	Gauteng	JBM	Stool culture	Stool	N	FEMALE	Unknown	Unknown	S	S	R	S	S	S	S	R	ND	ND
FD01874178	NA	791947	Shigella sonnei	no	no	No	no - ND	ND	ND	ND	2014-01-18	2013	Gauteng	EKH	Stool culture	Stool	N	MALE	4	1 - 4	S	S	R	R	S	S	S	R	ND	ND
FD01874179	ERS12564687	817877	Shigella sonnei	no	yes	Yes	yes	yes	yes	Shigella sonnei form II	2014-05-22	2014	Gauteng	TSW	Stool culture	Stool	N	FEMALE	57	41 - 60	R	Unknown	Unknown	Unknown	Unknown	S	Unknown	Unknown	3.7.11	1
FD01874180	ERS12564688	823137	Shigella sonnei	yes	yes	yes, merged (original and re-sequenced reads)	yes	yes	yes	Shigella sonnei form II	2014-01-06	2014	Western Cape	CAT	Stool culture	Stool	N	MALE	4	1 - 4	Unknown	Unknown	Unknown	Unknown	Unknown	Unknown	Unknown	Unknown	3.7.9	3
FD01874181	ERS12564689	831150	Shigella sonnei	yes	yes	yes, merged (original and re-sequenced reads)	yes	yes	yes	Shigella sonnei (low levels of form I)	2014-01-07	2014	Gauteng	EKH	Stool culture	Stool	N	MALE	5	5 - 10	S	Unknown	Unknown	Unknown	Unknown	S	Unknown	Unknown	3.7.9	3
FD01874182	ERS12564690	836762	Shigella sonnei	yes	yes	yes, merged (original and re-sequenced reads)	yes	yes	yes	Shigella sonnei, form I	2013-11-29	2014	Gauteng	TSW	Stool culture	Stool	N	FEMALE	23	21 - 40	R	Unknown	Unknown	Unknown	Unknown	S	Unknown	Unknown	2.8.2	2
FD01874183	ERS12564691	531877	Shigella sonnei	no	yes	Yes	yes	yes	yes	Shigella sonnei form II	2014-05-23	2011	Northern Cape	FRB	Stool culture	Stool	N	MALE	Unknown	Unknown	S	S	R	R	S	S	S	R	3.7.11	1
FD01874184	ERS12564692	540583	Shigella sonnei	yes	yes	yes, merged (original and re-sequenced reads)	yes	yes	yes	Shigella sonnei form II	2013-11-30	2011	Gauteng	WRA	Stool culture	Stool	N	FEMALE	Unknown	Unknown	S	S	R	R	S	S	S	R	3.7.11	1
FD01874185	ERS12564693	571095	Shigella sonnei	yes	yes	yes, merged (original and re-sequenced reads)	yes	yes	yes	Shigella sonnei form II	2013-12-01	2011	Gauteng	JBM	Stool culture	Stool	N	MALE	2	1 - 4	S	S	R	R	S	S	S	R	3.7.11	1
FD01874186	ERS12564694	800222	Shigella sonnei	no	yes	Yes	yes	yes	yes	Shigella sonnei, form I	2014-05-24	2013	Western Cape	CAT	Stool culture	Stool	N	FEMALE	1	1 - 4	S	S	R	R	S	S	S	R	3.7.9	3
FD01874187	ERS12564695	818098	Shigella sonnei	no	yes	Yes	yes	yes	yes	Shigella sonnei, form I	2014-05-25	2014	Gauteng	JBM	Stool culture	Stool	N	MALE	38	21 - 40	R	Unknown	Unknown	Unknown	Unknown	S	Unknown	Unknown	3.7.11	1
FD01874188	NA	823183	Shigella sonnei	yes	yes	No	yes	yes	yes	No prediction (no wzx)	2014-01-08	2014	Gauteng	JBM	Stool culture	Stool	N	FEMALE	3	1 - 4	Unknown	Unknown	Unknown	Unknown	Unknown	Unknown	Unknown	Unknown	ND	ND
FD01874189	ERS12564696	831747	Shigella sonnei	no	yes	Yes	yes	yes	yes	Shigella sonnei, form I	2014-05-26	2014	Gauteng	WRA	Stool culture	Stool	N	FEMALE	Unknown	Unknown	S	Unknown	Unknown	Unknown	Unknown	S	Unknown	Unknown	3.7.9	3
FD01874190	ERS12564697	836085	Shigella sonnei	no	yes	Yes	yes	yes	yes	Shigella sonnei, form I	2014-05-27	2014	Eastern Cape	AMT	Stool culture	Stool	N	MALE	1	1 - 4	S	Unknown	Unknown	Unknown	Unknown	S	Unknown	Unknown	3.7.7	2
FD01874191	ERS12564698	532743	Shigella sonnei	no	yes	Yes	yes	yes	yes	Shigella sonnei form II	2014-05-28	2011	Gauteng	TSW	Stool culture	Stool	N	FEMALE	3	1 - 4	S	S	S	S	S	S	S	S	3.7.11	1
FD01874192	ERS12564699	540765	Shigella sonnei	no	yes	Yes	yes	yes	yes	Shigella sonnei, form I	2014-05-29	2011	Gauteng	Unknown	Stool culture	Stool	N	MALE	0	< 1	S	S	R	R	S	S	S	R	3.7.7	2
FD01874193	ERS12564700	560972	Shigella sonnei	yes	yes	yes, merged (original and re-sequenced reads)	yes	yes	yes	Shigella sonnei, form I	2013-12-02	2011	Western Cape	CAT	Stool culture	Stool	N	FEMALE	35	21 - 40	S	S	R	R	S	S	S	R	3.7.7	2
FD01874579	ERS12564701	820291	Shigella flexneri 2A	no	yes	Yes	yes	yes	yes	Shigella flexneri serotype 2a	2013-07-16	2014	Western Cape	CAT	Stool culture	Stool	N	FEMALE	4	1 - 4	R	Unknown	Unknown	Unknown	Unknown	S	Unknown	Unknown	ND	2
FD01874580	ERS12564702	834676	Shigella flexneri 2A	no	yes	Yes	yes	yes	yes	Shigella flexneri serotype 2a	2013-07-17	2014	North West	BOP	Stool culture	Stool	N	FEMALE	2	1 - 4	R	Unknown	Unknown	Unknown	Unknown	S	Unknown	Unknown	ND	3
FD01874581	ERS12564703	850676	Shigella flexneri 2A	no	yes	Yes	yes	yes	yes	Shigella flexneri serotype 2a	2013-07-18	2014	Western Cape	CAT	Stool culture	Stool	N	MALE	Unknown	Unknown	R	Unknown	Unknown	Unknown	Unknown	S	Unknown	Unknown	ND	3
FD01874582	ERS12564704	869665	Shigella flexneri 2A	no	yes	Yes	yes	yes	yes	Shigella flexneri serotype 2a	2013-07-19	2014	Western Cape	CAT	Stool culture	Stool	N	MALE	5	5 - 10	R	Unknown	Unknown	Unknown	Unknown	S	Unknown	Unknown	ND	1
FD01874583	ERS12564705	889692	Shigella flexneri 2A	no	yes	Yes	yes	yes	yes	Shigella flexneri serotype 2a	2013-07-20	2015	Western Cape	CAT	Stool culture	Stool	N	FEMALE	4	1 - 4	Unknown	Unknown	Unknown	Unknown	Unknown	S	Unknown	Unknown	ND	2
FD01874584	NA	898985	Shigella flexneri 2A	no	no	No	no - ND	ND	ND	ND	2013-07-28	2015	Western Cape	CAT	Stool culture	Stool	N	FEMALE	7	5 - 10	Unknown	Unknown	Unknown	Unknown	Unknown	S	Unknown	Unknown	ND	ND
FD01874585	ERS12564706	913412	Shigella flexneri 2A	no	yes	Yes	yes	yes	yes	Shigella flexneri serotype 2a	2013-07-21	2015	Free State	MOT	Stool culture	Stool	N	MALE	3	1 - 4	Unknown	Unknown	Unknown	Unknown	Unknown	S	Unknown	Unknown	ND	3
FD01874586	NA	937508	Shigella flexneri 2A	no	no	No	no - ND	ND	ND	ND	2013-07-29	2015	Gauteng	TSW	Stool culture	Stool	N	MALE	0	< 1	Unknown	Unknown	Unknown	Unknown	Unknown	S	Unknown	Unknown	ND	ND
FD01874587	ERS12564707	821150	Shigella flexneri 2A	no	yes	Yes	yes	yes	yes	Shigella flexneri serotype 2a	2013-07-22	2014	KwaZulu-Natal	UMG	Stool culture	Stool	N	MALE	8	5 - 10	Unknown	Unknown	Unknown	Unknown	Unknown	Unknown	Unknown	Unknown	ND	1
FD01874588	ERS12564708	835531	Shigella flexneri 2A	no	yes	Yes	yes	yes	yes	Shigella flexneri serotype 2a	2013-07-23	2014	Western Cape	CAT	Stool culture	Stool	N	MALE	1	1 - 4	Unknown	Unknown	Unknown	Unknown	Unknown	Unknown	Unknown	Unknown	ND	4
FD01874589	ERS12564709	849645	Shigella flexneri 2A	yes	yes	yes, merged (original and re-sequenced reads)	yes	yes	yes	Shigella flexneri serotype 2a	2013-05-07	2014	Eastern Cape	AMT	Stool culture	Stool	N	FEMALE	1	1 - 4	Unknown	Unknown	Unknown	Unknown	Unknown	Unknown	Unknown	Unknown	ND	1
FD01874590	ERS12564710	871929	Shigella flexneri 2A	no	yes	Yes	yes	yes	yes	Shigella flexneri serotype 2a	2013-07-24	2014	Gauteng	TSW	Stool culture	Stool	N	MALE	1	1 - 4	Unknown	Unknown	Unknown	Unknown	Unknown	Unknown	Unknown	Unknown	ND	2
FD01874591	ERS12564711	890162	Shigella flexneri 2A	no	yes	Yes	yes	yes	yes	Shigella flexneri serotype 2a	2013-07-25	2015	Western Cape	CAT	Stool culture	Stool	N	FEMALE	35	21 - 40	R	Unknown	Unknown	Unknown	Unknown	S	Unknown	Unknown	ND	4
FD01874592	ERS12564712	899375	Shigella flexneri 2A	no	yes	Yes	yes	yes	yes	Shigella flexneri serotype 2a	2013-07-26	2015	KwaZulu-Natal	ETH	Stool culture	Stool	N	FEMALE	17	11 - 20	R	Unknown	Unknown	Unknown	Unknown	S	Unknown	Unknown	ND	2
FD01874593	ERS12564713	913788	Shigella flexneri 2A	no	yes	Yes	yes	yes	yes	Shigella flexneri serotype 2a	2013-07-27	2015	Eastern Cape	AMT	Stool culture	Stool	N	MALE	39	21 - 40	Unknown	Unknown	Unknown	Unknown	Unknown	S	Unknown	Unknown	ND	2
FD01874594	ERS12564714	940934	Shigella flexneri 2A	no	yes	Yes	yes	yes	yes	Shigella flexneri serotype 2a	2013-08-15	2015	Western Cape	CAT	Stool culture	Stool	N	MALE	1	1 - 4	Unknown	Unknown	Unknown	Unknown	Unknown	S	Unknown	Unknown	ND	4
FD01874595	ERS12564715	823219	Shigella flexneri 2A	no	yes	Yes	yes	yes	yes	Shigella flexneri serotype 2a	2013-08-16	2014	Eastern Cape	AMT	Stool culture	Stool	N	FEMALE	1	1 - 4	Unknown	Unknown	Unknown	Unknown	Unknown	Unknown	Unknown	Unknown	ND	2
FD01874596	ERS12564716	839627	Shigella flexneri 2A	no	yes	Yes	yes	yes	yes	Shigella flexneri serotype 2a	2013-08-17	2014	Gauteng	TSW	Stool culture	Stool	N	MALE	5	5 - 10	R	Unknown	Unknown	Unknown	Unknown	S	Unknown	Unknown	ND	3
FD01874597	ERS12564717	851083	Shigella flexneri 2A	no	yes	Yes	yes	yes	yes	Shigella flexneri serotype 2a	2013-08-18	2014	Gauteng	EKH	Stool culture	Stool	N	FEMALE	57	41 - 60	R	Unknown	Unknown	Unknown	Unknown	S	Unknown	Unknown	ND	2
FD01874598	ERS12564718	875008	Shigella flexneri 2A	no	yes	Yes	yes	yes	yes	Shigella flexneri serotype 2a	2013-08-19	2014	KwaZulu-Natal	SIS	Stool culture	Stool	N	FEMALE	0	< 1	R	Unknown	Unknown	Unknown	Unknown	S	Unknown	Unknown	ND	2
FD01874599	ERS12564719	891115	Shigella flexneri 2A	no	yes	Yes	yes	yes	yes	Shigella flexneri serotype 2a	2013-08-20	2015	Western Cape	CAT	Stool culture	Stool	N	MALE	3	1 - 4	R	Unknown	Unknown	Unknown	Unknown	S	Unknown	Unknown	ND	4
FD01874600	ERS12564720	900032	Shigella flexneri 2A	no	yes	Yes	yes	yes	yes	Shigella flexneri serotype 2a	2013-08-21	2015	Western Cape	CAT	Stool culture	Stool	N	FEMALE	26	21 - 40	Unknown	Unknown	Unknown	Unknown	Unknown	S	Unknown	Unknown	ND	3
FD01874601	ERS12564721	915012	Shigella flexneri 2A	no	yes	Yes	yes	yes	yes	Shigella flexneri serotype 2a	2013-08-22	2015	Western Cape	CAT	Stool culture	Stool	N	FEMALE	34	21 - 40	Unknown	Unknown	Unknown	Unknown	Unknown	S	Unknown	Unknown	ND	1
FD01874602	NA	943711	Shigella flexneri 2A	no	no	No	no - ND	ND	ND	ND	2013-07-30	2015	Eastern Cape	UKH	Stool culture	Stool	N	MALE	0	< 1	Unknown	Unknown	Unknown	Unknown	Unknown	S	Unknown	Unknown	ND	ND
FD01874603	ERS12564722	827137	Shigella flexneri 2A	no	yes	Yes	yes	yes	yes	Shigella flexneri serotype 2a	2013-08-23	2014	KwaZulu-Natal	UMG	Stool culture	Stool	N	MALE	2	1 - 4	R	Unknown	Unknown	Unknown	Unknown	S	Unknown	Unknown	ND	2
FD01874604	ERS12564723	836774	Shigella flexneri 2A	no	yes	Yes	yes	yes	yes	Shigella flexneri serotype 2a	2013-08-24	2014	Gauteng	TSW	Stool culture	Stool	N	FEMALE	5	5 - 10	S	Unknown	Unknown	Unknown	Unknown	S	Unknown	Unknown	ND	1
FD01874605	ERS12564724	854656	Shigella flexneri 2A	yes	yes	yes, merged (original and re-sequenced reads)	yes	yes	yes	Shigella flexneri serotype 2a	2013-05-08	2014	Gauteng	TSW	Stool culture	Stool	N	FEMALE	6	5 - 10	R	Unknown	Unknown	Unknown	Unknown	S	Unknown	Unknown	ND	2
FD01874606	ERS12564725	879834	Shigella flexneri 2A	no	yes	Yes	yes	yes	yes	Shigella flexneri serotype 2a	2013-08-25	2014	Free State	MOT	Stool culture	Stool	N	MALE	5	5 - 10	Unknown	Unknown	Unknown	Unknown	Unknown	Unknown	Unknown	Unknown	ND	1
FD01874607	ERS12564726	891919	Shigella flexneri 2A	no	yes	Yes	yes	yes	yes	Shigella flexneri serotype 2a	2013-08-26	2015	Eastern Cape	AMT	Stool culture	Stool	N	FEMALE	35	21 - 40	R	Unknown	Unknown	Unknown	Unknown	S	Unknown	Unknown	ND	2
FD01874608	ERS12564727	901048	Shigella flexneri 2A	no	yes	Yes	yes	yes	yes	Shigella flexneri serotype 2a	2013-08-27	2015	Western Cape	CAT	Stool culture	Stool	N	FEMALE	4	1 - 4	Unknown	Unknown	Unknown	Unknown	Unknown	S	Unknown	Unknown	ND	1
FD01874609	ERS12564728	917984	Shigella flexneri 2A	no	yes	Yes	yes	yes	yes	Shigella flexneri serotype 2a	2013-08-28	2015	KwaZulu-Natal	ETH	Stool culture	Stool	N	FEMALE	3	1 - 4	Unknown	Unknown	Unknown	Unknown	Unknown	S	Unknown	Unknown	ND	4
FD01874610	ERS12564729	944244	Shigella flexneri 2A	no	yes	Yes	yes	yes	yes	Shigella flexneri serotype 2a	2013-08-29	2015	Western Cape	BOL / CWI	Stool culture	Stool	N	FEMALE	49	41 - 60	Unknown	Unknown	Unknown	Unknown	Unknown	S	Unknown	Unknown	ND	4
FD01874611	ERS12564730	828317	Shigella flexneri 2A	no	yes	Yes	yes	yes	yes	Shigella flexneri serotype 2a	2013-08-30	2014	Western Cape	CAT	Stool culture	Stool	N	FEMALE	3	1 - 4	Unknown	Unknown	Unknown	Unknown	Unknown	Unknown	Unknown	Unknown	ND	2
FD01874612	ERS12564731	837787	Shigella flexneri 2A	no	yes	Yes	yes	yes	yes	Shigella flexneri serotype 2a	2013-08-31	2014	Western Cape	CAT	Stool culture	Stool	N	MALE	33	21 - 40	R	Unknown	Unknown	Unknown	Unknown	S	Unknown	Unknown	ND	1
FD01874613	NA	855816	Shigella flexneri 2A	yes	yes	No	no - uneven GC content curve	ND	ND	ND	2013-06-03	2014	Eastern Cape	AMT	Stool culture	Stool	N	MALE	2	1 - 4	R	Unknown	Unknown	Unknown	Unknown	S	Unknown	Unknown	ND	ND
FD01874614	ERS12564732	882492	Shigella flexneri 2A	no	yes	Yes	yes	yes	yes	Shigella flexneri serotype 2a	2013-09-01	2014	Eastern Cape	AMT	Stool culture	Stool	N	FEMALE	Unknown	Unknown	R	Unknown	Unknown	Unknown	Unknown	S	Unknown	Unknown	ND	2
FD01874615	NA	892869/893775	Shigella flexneri 2A	no	no	No	no - ND	ND	ND	ND	2013-07-31	2015	Western Cape	CAT	Stool culture	Stool	N	MALE	60	41 - 60	R	Unknown	Unknown	Unknown	Unknown	S	Unknown	Unknown	ND	ND
FD01874616	ERS12564733	901574	Shigella flexneri 2A	no	yes	Yes	yes	yes	yes	Shigella flexneri serotype 2a	2013-09-02	2015	Western Cape	CAT	Stool culture	Stool	N	FEMALE	2	1 - 4	Unknown	Unknown	Unknown	Unknown	Unknown	S	Unknown	Unknown	ND	2
FD01874617	ERS12564734	918732	Shigella flexneri 2A	no	yes	Yes	yes	yes	yes	Shigella flexneri serotype 2a	2013-09-03	2015	Eastern Cape	NMM	Stool culture	Stool	N	MALE	4	1 - 4	Unknown	Unknown	Unknown	Unknown	Unknown	S	Unknown	Unknown	ND	3
FD01874618	ERS12564735	945324	Shigella flexneri 2A	no	yes	Yes	yes	yes	yes	Shigella flexneri serotype 2a	2013-09-04	2015	Eastern Cape	AMT	Stool culture	Stool	N	FEMALE	2	1 - 4	Unknown	Unknown	Unknown	Unknown	Unknown	S	Unknown	Unknown	ND	4
FD01874619	ERS12564736	829069	Shigella flexneri 2A	no	yes	Yes	yes	yes	yes	Shigella flexneri serotype 2a	2013-09-05	2014	Eastern Cape	AMT	Stool culture	Stool	N	MALE	5	5 - 10	R	Unknown	Unknown	Unknown	Unknown	S	Unknown	Unknown	ND	2
FD01874620	ERS12564737	839600	Shigella flexneri 2A	no	yes	Yes	yes	yes	yes	Shigella flexneri serotype 2a	2013-09-06	2014	Eastern Cape	AMT	Stool culture	Stool	N	MALE	0	< 1	Unknown	Unknown	Unknown	Unknown	Unknown	Unknown	Unknown	Unknown	ND	2
FD01874621	ERS12564738	857254	Shigella flexneri 2A	no	yes	Yes	yes	yes	yes	Shigella flexneri serotype 2a	2013-09-07	2014	Gauteng	EKH	Stool culture	Stool	N	MALE	3	1 - 4	R	Unknown	Unknown	Unknown	Unknown	S	Unknown	Unknown	ND	4
FD01874622	NA	883554	Shigella flexneri 2A	no	no	No	no - ND	ND	ND	ND	2013-08-01	2015	Free State	MOT	Stool culture	Stool	N	FEMALE	53	41 - 60	R	Unknown	Unknown	Unknown	Unknown	S	Unknown	Unknown	ND	ND
FD01874623	ERS12564739	893600	Shigella flexneri 2A	no	yes	Yes	yes	yes	yes	Shigella flexneri serotype 2a	2013-09-08	2015	Western Cape	GRO / EDE	Stool culture	Stool	N	MALE	1	1 - 4	R	Unknown	Unknown	Unknown	Unknown	S	Unknown	Unknown	ND	4
FD01874624	ERS12564740	903082	Shigella flexneri 2A	no	yes	Yes	yes	yes	yes	Shigella flexneri serotype 2a	2013-09-09	2015	Western Cape	CAT	Stool culture	Stool	N	FEMALE	42	41 - 60	Unknown	Unknown	Unknown	Unknown	Unknown	S	Unknown	Unknown	ND	2
FD01874625	ERS12564741	920198	Shigella flexneri 2A	no	yes	Yes	yes	yes	yes	Shigella flexneri serotype 2a	2013-09-10	2015	KwaZulu-Natal	ETH	Stool culture	Stool	N	MALE	8	5 - 10	Unknown	Unknown	Unknown	Unknown	Unknown	S	Unknown	Unknown	ND	3
FD01874626	ERS12564742	945811	Shigella flexneri 2A	no	yes	Yes	yes	yes	yes	Shigella flexneri serotype 2a	2013-09-11	2015	Gauteng	TSW	Stool culture	Stool	N	FEMALE	80	61 - 80	Unknown	Unknown	Unknown	Unknown	Unknown	S	Unknown	Unknown	ND	1
FD01874627	ERS12564743	829595	Shigella flexneri 2A	no	yes	Yes	yes	yes	yes	Shigella flexneri serotype 2a	2013-09-12	2014	Western Cape	CAT	Stool culture	Stool	N	FEMALE	31	21 - 40	R	Unknown	Unknown	Unknown	Unknown	S	Unknown	Unknown	ND	4
FD01874628	ERS12564744	840088	Shigella flexneri 2A	no	yes	Yes	yes	yes	yes	Shigella flexneri serotype 2a	2013-09-13	2014	KwaZulu-Natal	ETH	Stool culture	Stool	N	MALE	2	1 - 4	R	Unknown	Unknown	Unknown	Unknown	S	Unknown	Unknown	ND	2
FD01874629	ERS12564745	858387	Shigella flexneri 2A	no	yes	Yes	yes	yes	yes	Shigella flexneri serotype 2a	2013-09-14	2014	Eastern Cape	NMM	Stool culture	Stool	N	MALE	4	1 - 4	R	Unknown	Unknown	Unknown	Unknown	S	Unknown	Unknown	ND	4
FD01874630	ERS12564746	884908	Shigella flexneri 2A	no	yes	Yes	yes	yes	yes	Shigella flexneri serotype 2a	2013-09-15	2015	KwaZulu-Natal	ETH	Stool culture	Stool	N	FEMALE	1	1 - 4	Unknown	Unknown	Unknown	Unknown	Unknown	S	Unknown	Unknown	ND	2
FD01874631	ERS12564747	894068	Shigella flexneri 2A	no	yes	Yes	yes	yes	yes	Shigella flexneri serotype 2a	2013-09-16	2015	Western Cape	CAT	Stool culture	Stool	N	FEMALE	6	5 - 10	S	Unknown	Unknown	Unknown	Unknown	R	Unknown	Unknown	ND	3
FD01874632	ERS12564748	906452	Shigella flexneri 2A	no	yes	Yes	yes	yes	yes	Shigella flexneri serotype 2a	2013-09-17	2015	Western Cape	CAT	Stool culture	Stool	N	FEMALE	25	21 - 40	Unknown	Unknown	Unknown	Unknown	Unknown	S	Unknown	Unknown	ND	3
FD01874633	ERS12564749	920991	Shigella flexneri 2A	no	yes	Yes	yes	yes	yes	Shigella flexneri serotype 2a	2013-09-18	2015	Eastern Cape	NMM	Stool culture	Stool	N	FEMALE	1	1 - 4	Unknown	Unknown	Unknown	Unknown	Unknown	S	Unknown	Unknown	ND	3
FD01874634	ERS12564750	946368	Shigella flexneri 2A	yes	yes	yes, merged (original and re-sequenced reads)	yes	yes	yes	Shigella flexneri serotype 2a	2013-05-09	2015	Free State	MOT	Stool culture	Stool	N	FEMALE	4	1 - 4	Unknown	Unknown	Unknown	Unknown	Unknown	S	Unknown	Unknown	ND	1
FD01874635	ERS12564751	830905	Shigella flexneri 2A	no	yes	Yes	yes	yes	yes	Shigella flexneri serotype 2a	2013-09-19	2014	Gauteng	WRA	Stool culture	Stool	N	FEMALE	29	21 - 40	S	Unknown	Unknown	Unknown	Unknown	S	Unknown	Unknown	ND	1
FD01874636	ERS12564752	842538	Shigella flexneri 2A	no	yes	Yes	yes	yes	yes	Shigella flexneri serotype 2a	2013-09-20	2014	Gauteng	TSW	Stool culture	Stool	N	MALE	3	1 - 4	R	Unknown	Unknown	Unknown	Unknown	S	Unknown	Unknown	ND	3
FD01874637	ERS12564753	860426	Shigella flexneri 2A	yes	yes	yes, merged (original and re-sequenced reads)	yes	yes	yes	Shigella flexneri serotype 2a	2013-05-10	2014	Gauteng	JBM	Stool culture	Stool	N	FEMALE	2	1 - 4	R	Unknown	Unknown	Unknown	Unknown	S	Unknown	Unknown	ND	4
FD01874638	ERS12564754	885825	Shigella flexneri 2A	yes	yes	yes, merged (original and re-sequenced reads)	yes	yes	yes	Shigella flexneri serotype 2a	2013-05-11	2015	Western Cape	CAT	Stool culture	Stool	N	FEMALE	9	5 - 10	R	Unknown	Unknown	Unknown	Unknown	S	Unknown	Unknown	ND	3
FD01874639	NA	895237/895242	Shigella flexneri 2A	no	no	No	no - ND	ND	ND	ND	2013-08-02	2015	Western Cape	CAT	Stool culture	Stool	N	FEMALE	35	21 - 40	R	Unknown	Unknown	Unknown	Unknown	S	Unknown	Unknown	ND	ND
FD01874640	ERS12564755	906894	Shigella flexneri 2A	yes	yes	yes, merged (original and re-sequenced reads)	yes	yes	yes	Shigella flexneri serotype 2a	2013-05-12	2015	Gauteng	JBM	Stool culture	Stool	N	MALE	1	1 - 4	Unknown	Unknown	Unknown	Unknown	Unknown	S	Unknown	Unknown	ND	2
FD01874641	ERS12564756	923318	Shigella flexneri 2A	yes	yes	yes, merged (original and re-sequenced reads)	yes	yes	yes	Shigella flexneri serotype 2a	2013-05-13	2015	KwaZulu-Natal	ETH	Stool culture	Stool	N	MALE	Unknown	Unknown	Unknown	Unknown	Unknown	Unknown	Unknown	S	Unknown	Unknown	ND	2
FD01874642	ERS12564757	946627	Shigella flexneri 2A	no	yes	Yes	yes	yes	yes	Shigella flexneri serotype 2a	2013-09-21	2015	KwaZulu-Natal	UMG	Stool culture	Stool	N	MALE	13	11 - 20	Unknown	Unknown	Unknown	Unknown	Unknown	S	Unknown	Unknown	ND	2
FD01874643	ERS12564758	831561	Shigella flexneri 2A	yes	yes	yes, merged (original and re-sequenced reads)	yes	yes	yes	Shigella flexneri serotype 2a	2013-02-13	2014	Free State	MOT	Stool culture	Stool	N	MALE	Unknown	Unknown	Unknown	Unknown	Unknown	Unknown	Unknown	Unknown	Unknown	Unknown	ND	3
FD01874644	ERS12564759	842721	Shigella flexneri 2A	no	yes	Yes	yes	yes	yes	Shigella flexneri serotype 2a	2013-09-22	2014	KwaZulu-Natal	ETH	Stool culture	Stool	N	MALE	Unknown	Unknown	S	Unknown	Unknown	Unknown	Unknown	S	Unknown	Unknown	ND	3
FD01874645	ERS12564760	860931	Shigella flexneri 2A	yes	yes	yes, merged (original and re-sequenced reads)	yes	yes	yes	Shigella flexneri serotype 2a	2013-05-14	2014	KwaZulu-Natal	UGU	Stool culture	Stool	N	MALE	6	5 - 10	R	Unknown	Unknown	Unknown	Unknown	S	Unknown	Unknown	ND	1
FD01874646	ERS12564761	886291	Shigella flexneri 2A	no	yes	Yes	yes	yes	yes	Shigella flexneri serotype 2a	2013-09-23	2015	Western Cape	CAT	Stool culture	Stool	N	MALE	3	1 - 4	Unknown	Unknown	Unknown	Unknown	Unknown	S	Unknown	Unknown	ND	2
FD01874647	ERS12564762	895891	Shigella flexneri 2A	no	yes	Yes	yes	yes	yes	Shigella flexneri serotype 2a	2013-09-24	2015	Gauteng	EKH	Stool culture	Stool	N	FEMALE	3	1 - 4	R	Unknown	Unknown	Unknown	Unknown	S	Unknown	Unknown	ND	3
FD01874649	ERS12564763	907588	Shigella flexneri 2A	no	yes	Yes	yes	yes	yes	Shigella flexneri serotype 2a	2013-09-25	2015	Eastern Cape	AMT	Stool culture	Stool	N	MALE	Unknown	Unknown	Unknown	Unknown	Unknown	Unknown	Unknown	S	Unknown	Unknown	ND	4
FD01874650	ERS12564764	927723	Shigella flexneri 2A	no	yes	Yes	yes	yes	yes	Shigella flexneri serotype 2a	2013-09-26	2015	Western Cape	CAT	Stool culture	Stool	N	MALE	16	11 - 20	Unknown	Unknown	Unknown	Unknown	Unknown	S	Unknown	Unknown	ND	4
FD01874651	ERS12564765	947540	Shigella flexneri 2A	no	yes	Yes	yes	yes	yes	Shigella flexneri serotype 2a	2013-09-27	2015	Western Cape	WEC	Stool culture	Stool	N	FEMALE	74	61 - 80	Unknown	Unknown	Unknown	Unknown	Unknown	S	Unknown	Unknown	ND	4
FD01874652	ERS12564766	832159	Shigella flexneri 2A	no	yes	Yes	yes	yes	yes	Shigella flexneri serotype 2a	2013-09-28	2014	Eastern Cape	AMT	Stool culture	Stool	N	MALE	48	41 - 60	Unknown	Unknown	Unknown	Unknown	Unknown	Unknown	Unknown	Unknown	ND	2
FD01874653	ERS12564767	831374	Shigella flexneri 2A	no	yes	Yes	yes	yes	yes	Shigella flexneri serotype 2a	2013-09-29	2014	Eastern Cape	NMM	Stool culture	Stool	N	FEMALE	5	5 - 10	R	Unknown	Unknown	Unknown	Unknown	S	Unknown	Unknown	ND	2
FD01874654	ERS12564768	863222	Shigella flexneri 2A	no	yes	Yes	yes	yes	yes	Shigella flexneri serotype 2a	2013-09-30	2014	Eastern Cape	AMT	Stool culture	Stool	N	FEMALE	63	61 - 80	R	Unknown	Unknown	Unknown	Unknown	S	Unknown	Unknown	ND	4
FD01874655	ERS12564769	887145	Shigella flexneri 2A	no	yes	Yes	yes	yes	yes	Shigella flexneri serotype 2a	2013-10-01	2015	Gauteng	JBM	Blood culture	Stool	Y	FEMALE	60	41 - 60	S	Unknown	Unknown	Unknown	Unknown	S	Unknown	Unknown	ND	1
FD01874656	ERS12564770	896352	Shigella flexneri 2A	no	yes	Yes	yes	yes	yes	Shigella flexneri serotype 2a	2013-10-02	2015	Western Cape	CAT	Stool culture	Stool	N	MALE	11	11 - 20	R	Unknown	Unknown	Unknown	Unknown	S	Unknown	Unknown	ND	4
FD01874657	ERS12564771	908401	Shigella flexneri 2A	no	yes	Yes	yes	yes	yes	Shigella flexneri serotype 2a	2013-10-03	2015	KwaZulu-Natal	UTU	Stool culture	Stool	N	FEMALE	74	61 - 80	Unknown	Unknown	Unknown	Unknown	Unknown	S	Unknown	Unknown	ND	2
FD01874658	ERS12564772	931617	Shigella flexneri 2A	no	yes	Yes	yes	yes	yes	Shigella flexneri serotype 2a	2013-10-04	2015	Gauteng	TSW	Stool culture	Stool	N	FEMALE	4	1 - 4	Unknown	Unknown	Unknown	Unknown	Unknown	S	Unknown	Unknown	ND	1
FD01874659	ERS12564773	940909	Shigella flexneri 2A	no	yes	Yes	yes	yes	yes	Shigella flexneri serotype 2a	2013-10-05	2015	Gauteng	JBM	Blood culture	Stool	Y	MALE	Unknown	Unknown	Unknown	Unknown	Unknown	Unknown	Unknown	S	Unknown	Unknown	ND	2
FD01874660	ERS12564774	832544	Shigella flexneri 2A	no	yes	Yes	yes	yes	yes	Shigella flexneri serotype 2a	2013-10-06	2014	Western Cape	CAT	Stool culture	Stool	N	MALE	18	11 - 20	Unknown	Unknown	Unknown	Unknown	Unknown	Unknown	Unknown	Unknown	ND	4
FD01874661	ERS12564775	844514	Shigella flexneri 2A	no	yes	Yes	yes	yes	yes	Shigella flexneri serotype 2a	2013-10-07	2014	Western Cape	BOL	Stool culture	Stool	N	MALE	33	21 - 40	R	Unknown	Unknown	Unknown	Unknown	S	Unknown	Unknown	ND	4
FD01874662	ERS12564776	864173	Shigella flexneri 2A	no	yes	Yes	yes	yes	yes	Shigella flexneri serotype 2a	2013-10-08	2014	Gauteng	JBM	Stool culture	Stool	N	FEMALE	8	5 - 10	R	Unknown	Unknown	Unknown	Unknown	S	Unknown	Unknown	ND	2
FD01874663	ERS12564777	888079	Shigella flexneri 2A	no	yes	Yes	yes	yes	yes	Shigella flexneri serotype 2a	2013-10-09	2015	Western Cape	CAT	Blood culture	Stool	Y	MALE	41	41 - 60	R	Unknown	Unknown	Unknown	Unknown	S	Unknown	Unknown	ND	2
FD01874664	ERS12564778	896890	Shigella flexneri 2A	no	yes	Yes	yes	yes	yes	Shigella flexneri serotype 2a	2013-10-10	2015	Western Cape	CAT	Stool culture	Stool	N	MALE	15	11 - 20	R	Unknown	Unknown	Unknown	Unknown	S	Unknown	Unknown	ND	4
FD01874665	NA	910148	Shigella flexneri 2A	no	no	No	no - ND	ND	ND	ND	2013-08-03	2015	Gauteng	EKH	Stool culture	Stool	N	FEMALE	Unknown	Unknown	Unknown	Unknown	Unknown	Unknown	Unknown	S	Unknown	Unknown	ND	ND
FD01874666	ERS12564779	934991	Shigella flexneri 2A	yes	yes	yes, merged (original and re-sequenced reads)	yes	yes	yes	Shigella flexneri serotype 2a	2013-05-15	2015	Gauteng	EKH	Stool culture	Stool	N	MALE	1	1 - 4	Unknown	Unknown	Unknown	Unknown	Unknown	S	Unknown	Unknown	ND	1
FD01874667	ERS12564780	842958	Shigella sonnei	yes	yes	yes, merged (original and re-sequenced reads)	yes	yes	yes	Shigella sonnei (low levels of form I)	2013-12-03	2014	Eastern Cape	AMT	Stool culture	Stool	N	MALE	3	1 - 4	S	Unknown	Unknown	Unknown	Unknown	S	Unknown	Unknown	3.7.9	3
FD01874668	ERS12564781	833402	Shigella flexneri 2A	no	yes	Yes	yes	yes	yes	Shigella flexneri serotype 2a	2013-10-11	2014	Free State	MOT	Stool culture	Stool	N	MALE	4	1 - 4	S	Unknown	Unknown	Unknown	Unknown	S	Unknown	Unknown	ND	1
FD01874669	ERS12564782	846664	Shigella flexneri 2A	no	yes	Yes	yes	yes	yes	Shigella flexneri serotype 2a	2013-10-12	2014	Limpopo	WAT	Stool culture	Stool	N	FEMALE	38	21 - 40	S	Unknown	Unknown	Unknown	Unknown	S	Unknown	Unknown	ND	1
FD01874670	ERS12564783	867493	Shigella flexneri 2A	yes	yes	yes, merged (original and re-sequenced reads)	yes	yes	yes	Shigella flexneri serotype 2a	2013-02-14	2014	Western Cape	CAT	Blood culture	Stool	Y	FEMALE	2	1 - 4	R	Unknown	Unknown	Unknown	Unknown	S	Unknown	Unknown	ND	2
FD01874671	ERS12564784	888896	Shigella flexneri 2A	no	yes	Yes	yes	yes	yes	Shigella flexneri serotype 2a	2013-10-13	2015	Eastern Cape	UKH	Stool culture	Stool	N	FEMALE	2	1 - 4	Unknown	Unknown	Unknown	Unknown	Unknown	S	Unknown	Unknown	ND	4
FD01874672	ERS12564785	897355	Shigella flexneri 2A	no	yes	Yes	yes	yes	yes	Shigella flexneri serotype 2a	2013-10-14	2015	Western Cape	CAT	Stool culture	Stool	N	MALE	31	21 - 40	R	Unknown	Unknown	Unknown	Unknown	S	Unknown	Unknown	ND	4
FD01874673	ERS12564786	911561	Shigella flexneri 2A	no	yes	Yes	yes	yes	yes	Shigella flexneri serotype 2a	2013-10-15	2015	Eastern Cape	AMT	Stool culture	Stool	N	FEMALE	2	1 - 4	Unknown	Unknown	Unknown	Unknown	Unknown	S	Unknown	Unknown	ND	4
FD01874674	NA	935947	Shigella flexneri 2A	no	no	No	no - ND	ND	ND	ND	2013-08-04	2015	KwaZulu-Natal	ETH	Stool culture	Stool	N	FEMALE	45	41 - 60	Unknown	Unknown	Unknown	Unknown	Unknown	S	Unknown	Unknown	ND	ND
FD01874675	ERS12564787	831375	Shigella sonnei	yes	yes	yes, merged (original and re-sequenced reads)	yes	yes	yes	Shigella sonnei, form I	2014-01-09	2014	Eastern Cape	NMM	Stool culture	Stool	N	MALE	0	< 1	R	Unknown	Unknown	Unknown	Unknown	S	Unknown	Unknown	3.7.9	3
FD01874676	ERS12564788	844505	Shigella sonnei	no	yes	Yes	yes	yes	yes	Shigella sonnei, form I	2014-05-30	2014	Western Cape	WEC	Stool culture	Stool	N	MALE	2	1 - 4	R	Unknown	Unknown	Unknown	Unknown	S	Unknown	Unknown	3.7.9	3
FD01874677	ERS12564789	886749	Shigella sonnei	no	yes	Yes	yes	yes	yes	Shigella sonnei, form I	2014-05-31	2015	Western Cape	CAT	Stool culture	Stool	N	MALE	Unknown	Unknown	S	Unknown	Unknown	Unknown	Unknown	S	Unknown	Unknown	3.7.11	1
FD01874678	ERS12564790	897440	Shigella sonnei	no	yes	Yes	yes	yes	yes	Shigella sonnei, form I	2014-06-01	2015	Gauteng	JBM	Stool culture	Stool	N	FEMALE	Unknown	Unknown	S	Unknown	Unknown	Unknown	Unknown	S	Unknown	Unknown	3.7.7	2
FD01874679	ERS12564791	917626	Shigella sonnei	no	yes	Yes	yes	yes	yes	Shigella sonnei, form I	2014-06-02	2015	Eastern Cape	NMM	Stool culture	Stool	N	MALE	3	1 - 4	Unknown	Unknown	Unknown	Unknown	Unknown	S	Unknown	Unknown	3.7.9	3
FD01874680	ERS12564792	946633	Shigella sonnei	no	yes	Yes	yes	yes	yes	Shigella sonnei form II	2014-06-03	2015	KwaZulu-Natal	SIS	Stool culture	Stool	N	MALE	4	1 - 4	Unknown	Unknown	Unknown	Unknown	Unknown	S	Unknown	Unknown	3.7.9	3
FD01874681	ERS12564793	722986	Shigella sonnei	no	yes	Yes	yes	yes	yes	Shigella sonnei, form I	2014-06-04	2013	Gauteng	JBM	Stool culture	Stool	N	FEMALE	Unknown	Unknown	S	S	R	R	S	Unknown	S	R	3.7.11	1
FD01874682	ERS12564794	731913	Shigella sonnei	no	yes	Yes	yes	yes	yes	Shigella sonnei, form I	2014-06-05	2013	Mpumalanga	EHL	Stool culture	Stool	N	UNK	Unknown	Unknown	S	S	S	S	S	S	S	S	3.7.11	1
FD01874683	ERS12564795	739003	Shigella sonnei	no	yes	Yes	yes	yes	yes	Shigella sonnei, form I	2014-06-06	2013	Gauteng	JBM	Stool culture	Stool	N	MALE	7	5 - 10	R	R	R	R	S	S	S	R	3.7.7	2
FD01874684	ERS12564796	851069	Shigella sonnei	no	yes	Yes	yes	yes	yes	Shigella sonnei form II	2014-06-07	2014	Eastern Cape	NMM	Stool culture	Stool	N	MALE	18	11 - 20	S	Unknown	Unknown	Unknown	Unknown	S	Unknown	Unknown	3.7.9	3
FD01874685	ERS12564797	888036	Shigella sonnei	no	yes	Yes	yes	yes	yes	Shigella sonnei form II	2014-06-08	2015	KwaZulu-Natal	ETH	Stool culture	Stool	N	FEMALE	Unknown	Unknown	R	Unknown	Unknown	Unknown	Unknown	S	Unknown	Unknown	3.7.11	1
FD01874686	ERS12564798	898671	Shigella sonnei	no	yes	Yes	yes	yes	yes	Shigella sonnei form II	2014-06-09	2015	Gauteng	EKH	Stool culture	Stool	N	FEMALE	2	1 - 4	Unknown	Unknown	Unknown	Unknown	Unknown	S	Unknown	Unknown	3.7.11	1
FD01874687	ERS12564799	919968	Shigella sonnei	no	yes	Yes	yes	yes	yes	Shigella sonnei, form I	2014-06-10	2015	Gauteng	JBM	Stool culture	Stool	N	FEMALE	53	41 - 60	Unknown	Unknown	Unknown	Unknown	Unknown	S	Unknown	Unknown	3.4.1	ND
FD01874688	ERS12564800	709017	Shigella sonnei	no	yes	Yes	yes	yes	yes	Shigella sonnei form II	2014-06-11	2012	KwaZulu-Natal	ETH	Stool culture	Stool	N	MALE	7	5 - 10	S	S	R	R	S	S	S	R	3.7.11	1
FD01874689	ERS12564801	724668	Shigella sonnei	no	yes	Yes	yes	yes	yes	Shigella sonnei form II	2014-06-12	2013	North West	SOU / KKA	Stool culture	Stool	N	MALE	36	21 - 40	S	S	R	R	S	S	S	R	3.7.11	1
FD01874690	NA	732128	Shigella sonnei	no	no	No	no - ND	ND	ND	ND	2014-01-19	2013	Eastern Cape	AMT	Stool culture	Stool	N	MALE	Unknown	Unknown	S	S	R	R	S	S	S	R	ND	ND
FD01874691	ERS12564802	741607	Shigella sonnei	no	yes	Yes	yes	yes	yes	Shigella sonnei, form I	2014-06-13	2013	Mpumalanga	NKG	Stool culture	Stool	N	MALE	4	1 - 4	S	S	S	S	S	S	S	S	3.7.7	2
FD01874692	ERS12564803	854197	Shigella sonnei	no	yes	Yes	yes	yes	yes	Shigella sonnei (low levels of form I)	2014-06-14	2014	Gauteng	EKH	Stool culture	Stool	N	MALE	6	5 - 10	S	Unknown	Unknown	Unknown	Unknown	S	Unknown	Unknown	3.7.11	1
FD01874693	ERS12564804	891539	Shigella sonnei	no	yes	Yes	yes	yes	yes	Shigella sonnei, form I	2014-06-15	2015	Gauteng	TSW	Stool culture	Stool	N	FEMALE	23	21 - 40	R	Unknown	Unknown	Unknown	Unknown	S	Unknown	Unknown	3.7.11	1
FD01874694	ERS12564805	899401	Shigella sonnei	no	yes	Yes	yes	yes	yes	Shigella sonnei form II	2014-06-16	2015	KwaZulu-Natal	ETH	Stool culture	Stool	N	MALE	2	1 - 4	S	Unknown	Unknown	Unknown	Unknown	S	Unknown	Unknown	3.7.9	3
FD01874695	NA	922176	Shigella sonnei	no	yes	No	yes	yes	yes	EIEC	2014-06-17	2015	Gauteng	JBM	Stool culture	Stool	N	MALE	51	41 - 60	Unknown	Unknown	Unknown	Unknown	Unknown	R	Unknown	Unknown	ND	ND
FD01874696	ERS12564806	709650	Shigella sonnei	no	yes	Yes	yes	yes	yes	Shigella sonnei (low levels of form I)	2014-06-18	2012	KwaZulu-Natal	AMJ	Stool culture	Stool	N	FEMALE	4	1 - 4	S	S	R	R	S	S	S	R	3.7.11	1
FD01874697	ERS12564807	724694	Shigella sonnei	no	yes	Yes	yes	yes	yes	Shigella sonnei, form I	2014-06-19	2013	Gauteng	JBM	Stool culture	Stool	N	FEMALE	3	1 - 4	S	S	R	R	S	S	S	R	3.7.11	1
FD01874698	ERS12564808	732216	Shigella sonnei	no	yes	Yes	yes	yes	yes	Shigella sonnei, form I	2014-06-20	2013	KwaZulu-Natal	UGU	Stool culture	Stool	N	MALE	0	< 1	S	S	R	R	S	S	S	R	3.7.9	3
FD01874699	ERS12564809	741623	Shigella sonnei	no	yes	Yes	yes	yes	yes	Shigella sonnei form II	2014-06-21	2013	Gauteng	JBM	Stool culture	Stool	N	FEMALE	61	61 - 80	S	S	R	R	S	S	S	R	3.7.11	1
FD01874700	ERS12564810	855365	Shigella sonnei	no	yes	Yes	yes	yes	yes	Shigella sonnei, form I	2014-06-22	2014	Gauteng	EKH	Stool culture	Stool	N	FEMALE	30	21 - 40	S	Unknown	Unknown	Unknown	Unknown	S	Unknown	Unknown	3.7.11	1
FD01874701	ERS12564811	889636	Shigella sonnei	no	yes	Yes	yes	yes	yes	Shigella sonnei form II	2014-06-23	2015	KwaZulu-Natal	UGU	Stool culture	Stool	N	FEMALE	2	1 - 4	S	Unknown	Unknown	Unknown	Unknown	S	Unknown	Unknown	3.7.11	1
FD01874702	ERS12564812	900379	Shigella sonnei	yes	yes	yes, merged (original and re-sequenced reads)	yes	yes	yes	Shigella sonnei form II	2014-01-10	2015	Gauteng	JBM	Stool culture	Stool	N	MALE	4	1 - 4	Unknown	Unknown	Unknown	Unknown	Unknown	S	Unknown	Unknown	3.7.9	3
FD01874703	ERS12564813	927667	Shigella sonnei	no	yes	Yes	yes	yes	yes	Shigella sonnei form II	2014-06-24	2015	KwaZulu-Natal	UGU	Stool culture	Stool	N	FEMALE	0	< 1	Unknown	Unknown	Unknown	Unknown	Unknown	S	Unknown	Unknown	3.7.11	1
FD01874704	ERS12564814	710736	Shigella sonnei	no	yes	Yes	yes	yes	yes	Shigella sonnei form II	2014-06-25	2012	Eastern Cape	NMM	Stool culture	Stool	N	MALE	3	1 - 4	S	S	R	R	S	S	S	R	3.7.9	3
FD01874705	ERS12564815	726772	Shigella sonnei	no	yes	Yes	yes	yes	yes	Shigella sonnei, form I	2014-06-26	2013	Gauteng	EKH	Stool culture	Stool	N	MALE	10	5 - 10	R	R	R	R	S	S	S	R	3.7.11	1
FD01874706	NA	732630	Shigella sonnei	no	no	No	no - ND	ND	ND	ND	2014-01-20	2013	Gauteng	SED	Stool culture	Stool	N	MALE	1	1 - 4	S	S	R	R	S	S	S	R	ND	ND
FD01874707	ERS12564816	742659	Shigella sonnei	no	yes	Yes	yes	yes	yes	Shigella sonnei form II	2014-06-27	2013	Eastern Cape	CAC	Stool culture	Stool	N	MALE	7	5 - 10	R	S	R	R	S	S	S	R	3.7.9	3
FD01874708	ERS12564817	857655	Shigella sonnei	no	yes	Yes	yes	yes	yes	Shigella sonnei form II	2014-06-28	2014	Free State	LEJ	Stool culture	Stool	N	FEMALE	9	5 - 10	R	Unknown	Unknown	Unknown	Unknown	S	Unknown	Unknown	3.7.9	3
FD01874709	NA	889868	Shigella sonnei	no	yes	No	yes	yes	yes	EIEC	2014-06-29	2015	Gauteng	EKH	Stool culture	Stool	N	MALE	Unknown	Unknown	R	Unknown	Unknown	Unknown	Unknown	S	Unknown	Unknown	ND	ND
FD01874710	ERS12564818	901591	Shigella sonnei	yes	yes	yes, merged (original and re-sequenced reads)	yes	yes	yes	Shigella sonnei, form I	2014-01-11	2015	KwaZulu-Natal	ETH	Stool culture	Stool	N	FEMALE	50	41 - 60	Unknown	Unknown	Unknown	Unknown	Unknown	S	Unknown	Unknown	3.6.1.1.3	2
FD01874711	ERS12564819	929575	Shigella sonnei	no	yes	Yes	yes	yes	yes	Shigella sonnei form II	2014-06-30	2015	Free State	MOT	Stool culture	Stool	N	FEMALE	4	1 - 4	Unknown	Unknown	Unknown	Unknown	Unknown	S	Unknown	Unknown	3.7.11	1
FD01874712	ERS12564820	715595	Shigella sonnei	no	yes	Yes	yes	yes	yes	Shigella sonnei form II	2014-07-01	2012	Western Cape	CAT	Stool culture	Stool	N	MALE	7	5 - 10	S	S	R	S	S	S	S	R	3.7.9	3
FD01874713	ERS12564821	727129	Shigella sonnei	no	yes	Yes	yes	yes	yes	Shigella sonnei, form I	2014-07-02	2013	North West	SOU / KKA	Stool culture	Stool	N	MALE	2	1 - 4	S	S	R	R	S	S	S	R	3.7.9	3
FD01874714	ERS12564822	732604	Shigella sonnei	no	yes	Yes	yes	yes	yes	Shigella sonnei form II	2014-07-03	2013	Eastern Cape	NMM	Stool culture	Stool	N	MALE	8	5 - 10	R	S	R	R	S	S	S	R	3.7.9	3
FD01874715	ERS12564823	742971	Shigella sonnei	yes	yes	yes, merged (original and re-sequenced reads)	yes	yes	yes	Shigella sonnei form II	2014-01-12	2013	Free State	MOT	Stool culture	Stool	N	FEMALE	3	1 - 4	S	S	R	R	S	S	S	R	3.7.11	1
FD01874716	ERS12564824	857491	Shigella sonnei	no	yes	Yes	yes	yes	yes	Shigella sonnei form II	2014-07-04	2014	Gauteng	EKH	Stool culture	Stool	N	MALE	Unknown	Unknown	R	Unknown	Unknown	Unknown	Unknown	S	Unknown	Unknown	3.7.11	1
FD01874717	ERS12564825	889884	Shigella sonnei	no	yes	Yes	yes	yes	yes	Shigella sonnei, form I	2014-07-05	2015	Gauteng	JBM	Stool culture	Stool	N	MALE	5	5 - 10	S	Unknown	Unknown	Unknown	Unknown	S	Unknown	Unknown	3.7.11	1
FD01874718	ERS12564826	901858	Shigella sonnei	yes	yes	No	yes	yes	yes	EIEC	2013-12-04	2015	Gauteng	JBM	Stool culture	Stool	N	FEMALE	Unknown	Unknown	Unknown	Unknown	Unknown	Unknown	Unknown	S	Unknown	Unknown	3.7.11	1
FD01874719	ERS12564827	935116	Shigella sonnei	yes	yes	yes, merged (original and re-sequenced reads)	yes	yes	yes	Shigella sonnei form II	2013-12-05	2015	Free State	MOT	Stool culture	Stool	N	FEMALE	44	41 - 60	Unknown	Unknown	Unknown	Unknown	Unknown	S	Unknown	Unknown	3.7.9	3
FD01874720	ERS12564828	710491	Shigella sonnei	no	yes	Yes	yes	yes	yes	Shigella sonnei, form I	2014-07-06	2013	Gauteng	SED	Stool culture	Stool	N	MALE	Unknown	Unknown	S	S	R	R	S	S	S	R	3.7.9	3
FD01874721	ERS12564829	727285	Shigella sonnei	no	yes	Yes	yes	yes	yes	Shigella sonnei, form I	2014-07-07	2013	Eastern Cape	AMT	Stool culture	Stool	N	FEMALE	7	5 - 10	S	S	R	R	S	S	S	R	3.7.7	2
FD01874722	ERS12564830	733770	Shigella sonnei	no	yes	Yes	yes	yes	yes	Shigella sonnei, form I	2014-07-08	2013	Gauteng	JBM	Stool culture	Stool	N	MALE	21	21 - 40	S	S	R	R	S	S	S	R	3.7.9	3
FD01874723	ERS12564831	746581	Shigella sonnei	no	yes	Yes	yes	yes	yes	Shigella sonnei form II	2014-07-09	2013	Gauteng	JBM	Stool culture	Stool	N	FEMALE	Unknown	Unknown	S	S	R	R	S	S	S	R	2.8.2	2
FD01874724	ERS12564832	860400	Shigella sonnei	no	yes	Yes	yes	yes	yes	Shigella sonnei, form I	2014-07-10	2014	Gauteng	TSW	Stool culture	Stool	N	MALE	0	< 1	S	Unknown	Unknown	Unknown	Unknown	S	Unknown	Unknown	3.7.9	3
FD01874725	ERS12564833	891547	Shigella sonnei	yes	yes	yes, merged (original and re-sequenced reads)	yes	yes	yes	Shigella sonnei, form I	2013-12-06	2015	Gauteng	TSW	Stool culture	Stool	N	MALE	43	41 - 60	Unknown	Unknown	Unknown	Unknown	Unknown	S	Unknown	Unknown	3.7.9	3
FD01874726	ERS12564834	902987	Shigella sonnei	no	yes	Yes	yes	yes	yes	Shigella sonnei form II	2014-07-11	2015	Gauteng	EKH	Stool culture	Stool	N	FEMALE	3	1 - 4	Unknown	Unknown	Unknown	Unknown	Unknown	S	Unknown	Unknown	3.7.9	3
FD01874727	ERS12564835	937390	Shigella sonnei	no	yes	Yes	yes	yes	yes	Shigella sonnei form II	2014-07-12	2015	KwaZulu-Natal	ETH	Stool culture	Stool	N	MALE	2	1 - 4	Unknown	Unknown	Unknown	Unknown	Unknown	S	Unknown	Unknown	3.7.11	1
FD01874728	ERS12564836	712722	Shigella sonnei	no	yes	Yes	yes	yes	yes	Shigella sonnei, form I	2014-07-13	2013	Gauteng	JBM	Stool culture	Stool	N	FEMALE	7	5 - 10	S	S	S	S	S	S	S	R	3.7.11	1
FD01874729	ERS12564837	729234	Shigella sonnei	no	yes	Yes	yes	yes	yes	Shigella sonnei form II	2014-07-14	2013	Eastern Cape	AMT	Stool culture	Stool	N	MALE	Unknown	Unknown	S	S	R	R	S	S	S	R	3.7.11	1
FD01874730	ERS12564838	733795	Shigella sonnei	yes	yes	yes, merged (original and re-sequenced reads)	yes	yes	yes	Shigella sonnei, form I	2013-12-07	2013	Gauteng	JBM	Stool culture	Stool	N	FEMALE	4	1 - 4	S	S	R	R	S	S	S	R	3.7.9	3
FD01874731	ERS12564839	748065	Shigella sonnei	no	yes	Yes	yes	yes	yes	Shigella sonnei, form I	2014-07-15	2013	Western Cape	GRO	Stool culture	Stool	N	FEMALE	17	11 - 20	S	S	S	S	S	S	S	R	2.8.2	ND
FD01874732	ERS12564840	864137	Shigella sonnei	no	yes	Yes	yes	yes	yes	Shigella sonnei, form I	2014-07-16	2014	Western Cape	CAT	Stool culture	Stool	N	FEMALE	Unknown	Unknown	S	Unknown	Unknown	Unknown	Unknown	S	Unknown	Unknown	3.7.9	3
FD01874733	ERS12564841	891993	Shigella sonnei	no	yes	Yes	yes	yes	yes	Shigella sonnei form II	2014-07-17	2015	KwaZulu-Natal	AMJ	Stool culture	Stool	N	MALE	3	1 - 4	Unknown	Unknown	Unknown	Unknown	Unknown	S	Unknown	Unknown	3.7.9	3
FD01874734	ERS12564842	906258	Shigella sonnei	no	yes	Yes	yes	yes	yes	Shigella sonnei, form I	2014-07-18	2015	Gauteng	TSW	Stool culture	Stool	N	MALE	0	< 1	Unknown	Unknown	Unknown	Unknown	Unknown	S	Unknown	Unknown	3.7.11	1
FD01874735	NA	940986	Shigella sonnei	no	yes	No	yes	yes	yes	EIEC	2014-07-19	2015	Gauteng	JBM	Stool culture	Stool	N	MALE	3	1 - 4	Unknown	Unknown	Unknown	Unknown	Unknown	S	Unknown	Unknown	ND	ND
FD01874736	ERS12564843	722197	Shigella sonnei	no	yes	Yes	yes	yes	yes	Shigella sonnei, form I	2014-07-20	2013	Eastern Cape	NMM	Stool culture	Stool	N	MALE	1	1 - 4	S	S	R	R	S	S	S	R	3.7.9	3
FD01874737	ERS12564844	728365	Shigella sonnei	no	yes	Yes	yes	yes	yes	Shigella sonnei, form I	2014-07-21	2013	Eastern Cape	AMT	Stool culture	Stool	N	FEMALE	2	1 - 4	S	S	R	R	S	S	S	R	3.7.7	2
FD01874738	ERS12564845	734067	Shigella sonnei	no	yes	Yes	yes	yes	yes	Shigella sonnei, form I	2014-07-22	2013	Free State	MOT	Stool culture	Stool	N	MALE	1	1 - 4	S	S	R	R	S	S	S	R	3.7.9	3
FD01874739	ERS12564846	749140	Shigella sonnei	no	yes	Yes	yes	yes	yes	Shigella sonnei, form I	2014-07-23	2013	Gauteng	TSW	Stool culture	Stool	N	MALE	2	1 - 4	S	S	R	R	S	S	S	R	3.7.9	3
FD01874740	ERS12564847	867178	Shigella sonnei	no	yes	Yes	yes	yes	yes	Shigella sonnei (low levels of form I)	2014-07-24	2014	Mpumalanga	EHL	Stool culture	Stool	N	FEMALE	Unknown	Unknown	S	Unknown	Unknown	Unknown	Unknown	S	Unknown	Unknown	3.7.9	3
FD01874741	ERS12564848	892874	Shigella sonnei	yes	yes	yes, merged (original and re-sequenced reads)	yes	yes	yes	Shigella sonnei form II	2014-01-13	2015	Free State	LEJ	Stool culture	Stool	N	MALE	3	1 - 4	S	Unknown	Unknown	Unknown	Unknown	S	Unknown	Unknown	3.7.11	1
FD01874742	ERS12564849	901497	Shigella sonnei	no	yes	Yes	yes	yes	yes	Shigella sonnei form II	2014-07-25	2015	Western Cape	CAT	Stool culture	Stool	N	MALE	28	21 - 40	Unknown	Unknown	Unknown	Unknown	Unknown	S	Unknown	Unknown	3.7.11	1
FD01874743	ERS12564850	943713	Shigella sonnei	no	yes	Yes	yes	yes	yes	Shigella sonnei, form I	2014-07-26	2015	Eastern Cape	AMT	Stool culture	Stool	N	FEMALE	4	1 - 4	Unknown	Unknown	Unknown	Unknown	Unknown	S	Unknown	Unknown	3.7.9	3
FD01874744	ERS12564851	720044	Shigella sonnei	no	yes	Yes	yes	yes	yes	Shigella sonnei, form I	2014-07-27	2013	Gauteng	EKH	Stool culture	Stool	N	MALE	32	21 - 40	R	S	R	R	S	S	S	R	3.7.11	1
FD01874745	ERS12564852	728603	Shigella sonnei	no	yes	Yes	yes	yes	yes	Shigella sonnei, form I	2014-07-28	2013	Gauteng	JBM	Stool culture	Stool	N	MALE	Unknown	Unknown	S	S	R	R	R	S	S	R	3.7.11	1
FD01874746	ERS12564853	736479	Shigella sonnei	no	yes	Yes	yes	yes	yes	Shigella sonnei, form I	2014-07-29	2013	Gauteng	WRA	Stool culture	Stool	N	MALE	0	< 1	S	S	R	R	S	S	S	R	3.7.9	3
FD01874747	ERS12564854	750983	Shigella sonnei	no	yes	Yes	yes	yes	yes	Shigella sonnei, form I	2014-07-30	2013	Gauteng	TSW	Stool culture	Stool	N	MALE	1	1 - 4	S	S	R	R	S	S	S	S	3.7.11	1
FD01874748	ERS12564855	875005	Shigella sonnei	yes	yes	yes, merged (original and re-sequenced reads)	yes	yes	yes	Shigella sonnei, form I	2014-01-14	2014	KwaZulu-Natal	ETH	Stool culture	Stool	N	MALE	3	1 - 4	R	Unknown	Unknown	Unknown	Unknown	S	Unknown	Unknown	3.7.11	1
FD01874749	ERS12564856	893613	Shigella sonnei	no	yes	Yes	yes	yes	yes	Shigella sonnei, form I	2014-07-31	2015	Gauteng	JBM	Stool culture	Stool	N	FEMALE	9	5 - 10	S	Unknown	Unknown	Unknown	Unknown	S	Unknown	Unknown	3.7.9	3
FD01874750	ERS12564857	908447	Shigella sonnei	no	yes	Yes	yes	yes	yes	Shigella sonnei form II	2014-08-01	2015	KwaZulu-Natal	UMG	Stool culture	Stool	N	FEMALE	1	1 - 4	Unknown	Unknown	Unknown	Unknown	Unknown	S	Unknown	Unknown	3.7.9	3
FD01874751	ERS12564858	944299	Shigella sonnei	no	yes	Yes	yes	yes	yes	Shigella sonnei, form I	2014-08-02	2015	Gauteng	TSW	Stool culture	Stool	N	MALE	Unknown	Unknown	Unknown	Unknown	Unknown	Unknown	Unknown	S	Unknown	Unknown	3.7.11	1
FD01874752	ERS12564859	721298	Shigella sonnei	no	yes	Yes	yes	yes	yes	Shigella sonnei, form I	2014-08-03	2013	Gauteng	JBM	Stool culture	Stool	N	FEMALE	2	1 - 4	S	S	R	R	S	S	S	R	3.7.11	1
FD01874753	ERS12564860	729643	Shigella sonnei	no	yes	Yes	yes	yes	yes	Shigella sonnei, form I	2014-08-04	2013	Gauteng	JBM	Stool culture	Stool	N	MALE	Unknown	Unknown	S	S	R	R	S	S	S	R	3.7.11	1
FD01874754	ERS12564861	736663	Shigella sonnei	no	yes	Yes	yes	yes	yes	Shigella sonnei, form I	2014-08-05	2013	Gauteng	JBM	Stool culture	Stool	N	FEMALE	35	21 - 40	S	S	R	R	S	S	S	R	3.7.11	1
FD01874755	ERS12564862	752955	Shigella sonnei	no	yes	Yes	yes	yes	yes	Shigella sonnei, form I	2014-08-06	2013	Free State	LEJ	Stool culture	Stool	N	MALE	28	21 - 40	S	S	R	R	S	S	S	R	3.7.11	1
FD01874756	ERS12564863	882509	Shigella sonnei	yes	yes	yes, merged (original and re-sequenced reads)	yes	yes	yes	Shigella sonnei, form I	2014-01-15	2014	Eastern Cape	AMT	Stool culture	Stool	N	MALE	0	< 1	S	Unknown	Unknown	Unknown	Unknown	S	Unknown	Unknown	3.7.11	1
FD01874757	ERS12564864	893749	Shigella sonnei	no	yes	Yes	yes	yes	yes	Shigella sonnei, form I	2014-08-07	2015	Gauteng	JBM	Stool culture	Stool	N	FEMALE	Unknown	Unknown	S	Unknown	Unknown	Unknown	Unknown	S	Unknown	Unknown	3.7.9	3
FD01874758	ERS12564865	912981	Shigella sonnei	yes	yes	yes, merged (original and re-sequenced reads)	yes	yes	yes	Shigella sonnei, form I	2013-12-08	2015	Western Cape	CAT	Stool culture	Stool	N	FEMALE	32	21 - 40	Unknown	Unknown	Unknown	Unknown	Unknown	S	Unknown	Unknown	3.7.11	1
FD01874759	NA	944292	Shigella sonnei	no	yes	No	yes	no - <20 coverage	ND	Not Shigella or EIEC	2014-01-27	2015	Gauteng	EKH	Stool culture	Stool	N	FEMALE	Unknown	Unknown	I	Unknown	Unknown	Unknown	Unknown	S	Unknown	Unknown	ND	ND
FD01874760	ERS12564866	721569	Shigella sonnei	no	yes	Yes	yes	yes	yes	Shigella sonnei form II	2014-08-08	2013	KwaZulu-Natal	ETH	Stool culture	Stool	N	FEMALE	24	21 - 40	S	S	R	R	S	S	S	R	3.7.9	3
FD01874761	ERS12564867	730371	Shigella sonnei	no	yes	Yes	yes	yes	yes	Shigella sonnei, form I	2014-08-09	2013	Gauteng	TSW	Stool culture	Stool	N	FEMALE	69	61 - 80	S	S	S	S	S	S	S	S	3.7.11	1
FD01874762	ERS12564868	736971	Shigella sonnei	no	yes	Yes	yes	yes	yes	Shigella sonnei, form I	2014-08-10	2013	KwaZulu-Natal	UMG	Stool culture	Stool	N	FEMALE	13	11 - 20	R	S	R	R	S	S	S	R	3.7.9	3
FD01874763	ERS12564869	755095	Shigella sonnei	no	yes	Yes	yes	yes	yes	Shigella sonnei form II	2014-08-11	2013	Gauteng	EKH	Stool culture	Stool	N	MALE	0	< 1	S	S	R	R	S	S	S	R	3.7.9	3
FD01874764	ERS12564870	885909	Shigella sonnei	no	yes	Yes	yes	yes	yes	Shigella sonnei, form I	2014-08-12	2014	KwaZulu-Natal	AMJ	Stool culture	Stool	N	MALE	3	1 - 4	S	Unknown	Unknown	Unknown	Unknown	S	Unknown	Unknown	3.7.11	1
FD01874765	NA	895947	Shigella sonnei	no	no	No	no - ND	ND	ND	ND	2014-01-21	2015	Western Cape	CAT	Stool culture	Stool	N	FEMALE	51	41 - 60	Unknown	Unknown	Unknown	Unknown	Unknown	S	Unknown	Unknown	ND	ND
FD01874766	ERS12564871	913667	Shigella sonnei	no	yes	Yes	yes	yes	yes	Shigella sonnei, form I	2014-08-13	2015	Gauteng	TSW	Stool culture	Stool	N	FEMALE	45	41 - 60	Unknown	Unknown	Unknown	Unknown	Unknown	S	Unknown	Unknown	2.8.2	2
FD01874767	ERS12564872	944676	Shigella sonnei	no	yes	Yes	yes	yes	yes	Shigella sonnei, form I	2014-08-14	2015	Free State	MOT	Stool culture	Stool	N	MALE	2	1 - 4	Unknown	Unknown	Unknown	Unknown	Unknown	S	Unknown	Unknown	3.7.7	2
FD01874768	ERS12564873	722914	Shigella sonnei	no	yes	Yes	yes	yes	yes	Shigella sonnei, form I	2014-08-15	2013	Mpumalanga	EAV / GSI	Stool culture	Stool	N	FEMALE	Unknown	Unknown	S	S	R	R	S	S	S	R	3.7.9	3
FD01874769	ERS12564874	730755	Shigella sonnei	no	yes	Yes	yes	yes	yes	Shigella sonnei form II	2014-08-16	2013	KwaZulu-Natal	ETH	Stool culture	Stool	N	MALE	29	21 - 40	S	S	R	R	S	S	S	R	3.7.11	1
FD01874770	ERS12564875	736659	Shigella sonnei	no	yes	Yes	yes	yes	yes	Shigella sonnei, form I	2014-08-17	2013	Gauteng	JBM	Stool culture	Stool	N	FEMALE	6	5 - 10	S	S	R	R	S	S	S	R	3.7.9	3
FD01874771	ERS12564876	756787	Shigella sonnei	yes	yes	yes, merged (original and re-sequenced reads)	yes	yes	yes	Shigella sonnei, form I	2014-01-16	2013	Western Cape	CAT	Stool culture	Stool	N	FEMALE	55	41 - 60	S	S	R	R	S	S	S	R	3.7.11	1
FD01876599	ERS12564877	525989	Shigella flexneri 2A	yes	yes	yes, merged (original and re-sequenced reads)	yes	yes	yes	Shigella flexneri serotype 2a	2013-02-15	2011	KwaZulu-Natal	ETH	Blood culture	Stool	Y	MALE	0	< 1	S	S	R	R	S	S	S	R	ND	2
FD01876600	ERS12564878	536237	Shigella flexneri 2A	no	yes	Yes	yes	yes	yes	Shigella flexneri serotype 2a	2013-10-16	2011	Western Cape	CAT	Stool culture	Stool	N	FEMALE	1	1 - 4	S	S	S	S	S	S	S	R	ND	1
FD01876601	ERS12564879	546415	Shigella flexneri 2A	no	yes	Yes	yes	yes	yes	Shigella flexneri serotype 2a	2013-10-17	2011	Northern Cape	FRB	Stool culture	Stool	N	FEMALE	0	< 1	S	S	R	S	S	S	S	R	ND	1
FD01876602	ERS12564880	569264	Shigella flexneri 2A	no	yes	Yes	yes	yes	yes	Shigella flexneri serotype 2a	2013-10-18	2011	Gauteng	EKH	Stool culture	Stool	N	MALE	Unknown	Unknown	R	R	R	R	S	S	S	R	ND	2
FD01876603	ERS12564881	588259	Shigella flexneri 2A	yes	yes	yes, merged (original and re-sequenced reads)	yes	yes	yes	Shigella flexneri serotype 2a	2013-02-16	2011	Western Cape	CAT	Stool culture	Stool	N	MALE	7	5 - 10	S	S	S	S	S	S	S	S	ND	1
FD01876604	ERS12564882	617761	Shigella flexneri 2A	no	yes	Yes	yes	yes	yes	Shigella flexneri serotype 2a	2013-10-19	2011	Gauteng	SED	Stool culture	Stool	N	FEMALE	2	1 - 4	R	S	S	R	S	S	S	R	ND	1
FD01876606	ERS12564883	630012	Shigella flexneri 2A	yes	yes	yes, merged (original and re-sequenced reads)	yes	yes	yes	Shigella flexneri serotype 2a	2013-02-17	2012	Eastern Cape	AMT	Stool culture	Stool	N	FEMALE	5	5 - 10	S	S	S	S	S	S	S	S	ND	1
FD01876607	ERS12564884	649556	Shigella flexneri 2A	no	yes	Yes	yes	yes	yes	Shigella flexneri serotype 2a	2013-10-20	2012	Western Cape	CAT	Stool culture	Stool	N	FEMALE	1	1 - 4	R	R	R	R	S	S	S	R	ND	2
FD01876608	NA	528445	Shigella flexneri 2A	no	yes	No	yes	no - <20 coverage	ND	ND	2013-05-30	2011	Western Cape	CAT	Blood culture	Stool	Y	MALE	0	< 1	S	S	S	S	S	S	S	S	ND	ND
FD01876609	ERS12564885	537374	Shigella flexneri 2A	no	yes	Yes	yes	yes	yes	Shigella flexneri serotype 2a	2013-10-21	2011	KwaZulu-Natal	UMG	Blood culture	Stool	Y	FEMALE	74	61 - 80	S	S	S	S	S	S	S	R	ND	1
FD01876610	ERS12564886	547855	Shigella flexneri 2A	no	yes	Yes	yes	yes	yes	Shigella flexneri serotype 2a	2013-10-22	2011	Eastern Cape	NMM	Stool culture	Stool	N	MALE	0	< 1	R	R	R	R	S	S	S	R	ND	2
FD01876611	ERS12564887	571880	Shigella flexneri 2A	no	yes	Yes	yes	yes	yes	Shigella flexneri serotype 2a	2013-10-23	2011	Western Cape	CAT	Stool culture	Stool	N	MALE	7	5 - 10	R	R	R	R	S	S	S	S	ND	2
FD01876612	ERS12564888	590512	Shigella flexneri 2A	no	yes	Yes	yes	yes	yes	Shigella flexneri serotype 2a	2013-10-24	2011	Eastern Cape	AMT	Stool culture	Stool	N	MALE	1	1 - 4	R	R	R	R	S	S	S	R	ND	4
FD01876613	ERS12564889	618150	Shigella flexneri 2A	yes	yes	yes, merged (original and re-sequenced reads)	yes	yes	yes	Shigella flexneri serotype 2a	2013-02-18	2011	Western Cape	CAT	Blood culture	Stool	Y	FEMALE	86	1 - 4	R	R	R	R	S	S	S	S	ND	2
FD01876614	NA	630530	Shigella flexneri 2A	yes	yes	No	no - per base sequence content	ND	ND	ND	2013-06-05	2012	Eastern Cape	AMT	Stool culture	Stool	N	FEMALE	24	21 - 40	R	R	R	R	S	S	S	R	ND	ND
FD01876615	ERS12564890	646110	Shigella flexneri 2A	yes	yes	yes, merged (original and re-sequenced reads)	yes	yes	yes	Shigella flexneri serotype 2a	2013-02-19	2012	Gauteng	JBM	Stool culture	Blood culture	Y	MALE	Unknown	Unknown	R	R	R	R	S	S	S	R	ND	2
FD01876616	NA	527583	Shigella flexneri 2A	yes	yes	No	no - uneven GC content curve	ND	ND	ND	2013-06-04	2011	Gauteng	JBM	Stool culture	Stool	N	FEMALE	0	< 1	R	R	R	R	S	S	S	R	ND	ND
FD01876617	ERS12564891	537781	Shigella flexneri 2A	no	yes	Yes	yes	yes	yes	Shigella flexneri serotype 2a	2013-10-25	2011	Eastern Cape	Unknown	Stool culture	Stool	N	MALE	2	1 - 4	R	R	R	R	S	S	S	R	ND	4
FD01876618	ERS12564892	548223	Shigella flexneri 2A	no	yes	Yes	yes	yes	yes	Shigella flexneri serotype 2a	2013-10-26	2011	KwaZulu-Natal	ETH	Blood culture	Stool	Y	FEMALE	26	21 - 40	R	R	R	R	S	S	S	R	ND	2
FD01876619	ERS12564893	573812	Shigella flexneri 2A	no	yes	Yes	yes	yes	yes	Shigella flexneri serotype 2a	2013-10-27	2011	Western Cape	CAT	Stool culture	Stool	N	MALE	11	11 - 20	R	S	R	S	S	S	S	R	ND	1
FD01876620	ERS12564894	596673	Shigella flexneri 2A	no	yes	Yes	yes	yes	yes	Shigella flexneri serotype 2a	2013-10-28	2011	Gauteng	Unknown	Stool culture	Stool	N	FEMALE	Unknown	Unknown	S	S	S	S	S	S	S	S	ND	1
FD01876621	ERS12564895	623725	Shigella flexneri 2A	yes	yes	yes, merged (original and re-sequenced reads)	yes	yes	yes	Shigella flexneri serotype 2a	2013-02-20	2011	Western Cape	CAT	Stool culture	Stool	N	FEMALE	22	21 - 40	R	R	R	R	S	S	S	R	ND	2
FD01876622	ERS12564896	631750	Shigella flexneri 2A	no	yes	Yes	yes	yes	yes	Shigella flexneri serotype 2a	2013-10-29	2012	Eastern Cape	AMT	Stool culture	Stool	N	FEMALE	46	41 - 60	R	R	R	R	S	S	S	R	ND	3
FD01876623	ERS12564897	649490	Shigella flexneri 2A	yes	yes	yes, merged (original and re-sequenced reads)	yes	yes	yes	Shigella flexneri serotype 2a	2013-02-21	2012	Eastern Cape	Unknown	Stool culture	Stool	N	MALE	0	< 1	R	R	R	R	S	S	S	R	ND	4
FD01876624	ERS12564898	527879	Shigella flexneri 2A	no	yes	Yes	yes	yes	yes	Shigella flexneri serotype 2a	2013-10-30	2011	Western Cape	CAT	Stool culture	Stool	N	FEMALE	1	1 - 4	R	R	R	R	S	S	S	R	ND	2
FD01876625	NA	539035	Shigella flexneri 2A	no	no	No	no - ND	ND	ND	ND	2013-08-05	2011	Eastern Cape	AMT	Stool culture	Stool	N	MALE	6	5 - 10	R	R	R	R	S	S	S	R	ND	ND
FD01876626	ERS12564899	554820	Shigella flexneri 2A	yes	yes	yes, merged (original and re-sequenced reads)	yes	yes	yes	Shigella flexneri serotype 2a	2013-05-16	2011	Western Cape	CAT	Stool culture	Stool	N	FEMALE	2	1 - 4	S	S	S	S	S	S	S	S	ND	1
FD01876627	ERS12564900	572653	Shigella flexneri 2A	no	yes	Yes	yes	yes	yes	Shigella flexneri serotype 2a	2013-10-31	2011	Western Cape	CAT	Stool culture	Stool	N	UNKNOWN	1	1 - 4	R	R	R	R	S	S	S	R	ND	4
FD01876628	ERS12564901	601950	Shigella flexneri 2A	yes	yes	yes, merged (original and re-sequenced reads)	yes	yes	yes	Shigella flexneri serotype 2a	2013-05-17	2011	Western Cape	CAT	Stool culture	Stool	N	MALE	21	21 - 40	R	R	R	R	S	S	S	R	ND	2
FD01876629	ERS12564902	624760	Shigella flexneri 2A	yes	yes	yes, merged (original and re-sequenced reads)	yes	yes	yes	Shigella flexneri serotype 2a	2013-05-18	2011	Eastern Cape	NMM	Stool culture	Stool	N	FEMALE	5	5 - 10	R	R	R	R	S	S	S	R	ND	4
FD01876630	ERS12564903	633999	Shigella flexneri 2A	yes	yes	yes, merged (original and re-sequenced reads)	yes	yes	yes	Shigella flexneri serotype 2a	2013-02-22	2012	Western Cape	CAT	Stool culture	Stool	N	FEMALE	5	5 - 10	R	S	S	S	S	S	S	R	ND	1
FD01876631	ERS12564904	649605	Shigella flexneri 2A	yes	yes	yes, merged (original and re-sequenced reads)	yes	yes	yes	Shigella flexneri serotype 2a	2013-02-23	2012	Western Cape	CAT	Stool culture	Stool	N	MALE	41	41 - 60	R	R	R	R	S	S	S	R	ND	4
FD01876632	ERS12564905	527901	Shigella flexneri 2A	yes	yes	yes, merged (original and re-sequenced reads)	yes	yes	yes	Shigella flexneri serotype 2a	2013-02-24	2011	Western Cape	CAT	Stool culture	Stool	N	FEMALE	2	1 - 4	S	S	S	S	S	S	S	S	ND	1
FD01876633	ERS12564906	540628	Shigella flexneri 2A	yes	yes	yes, merged (original and re-sequenced reads)	yes	yes	yes	Shigella flexneri serotype 2a	2013-02-25	2011	Mpumalanga	EAV / GSI	Stool culture	Stool	N	FEMALE	38	21 - 40	R	R	R	R	S	S	S	R	ND	2
FD01876634	NA	555420	Shigella flexneri 2A	no	no	No	no - ND	ND	ND	ND	2013-08-06	2011	KwaZulu-Natal	ETH	Stool culture	Stool	N	MALE	3	1 - 4	R	R	R	R	S	S	S	R	ND	ND
FD01876635	ERS12564907	575227	Shigella flexneri 2A	no	yes	Yes	yes	yes	yes	Shigella flexneri serotype 2a	2013-11-01	2011	Eastern Cape	NMM	Stool culture	Stool	N	FEMALE	4	1 - 4	S	S	S	S	S	S	S	R	ND	1
FD01876636	ERS12564908	602492	Shigella flexneri 2A	no	yes	Yes	yes	yes	yes	Shigella flexneri serotype 2a	2013-11-02	2011	Gauteng	EKH	Stool culture	Stool	N	FEMALE	Unknown	Unknown	R	R	R	S	S	S	S	R	ND	3
FD01876637	ERS12564909	625333	Shigella flexneri 2A	yes	yes	yes, merged (original and re-sequenced reads)	yes	yes	yes	Shigella flexneri serotype 2a	2013-02-26	2011	Eastern Cape	NMM	Stool culture	Stool	N	MALE	2	1 - 4	S	S	R	S	S	S	S	R	ND	2
FD01876638	ERS12564910	633116	Shigella flexneri 2A	yes	yes	yes, merged (original and re-sequenced reads)	yes	yes	yes	Shigella flexneri serotype 2a	2013-05-19	2012	Western Cape	CAT	Stool culture	Stool	N	MALE	1	1 - 4	R	R	R	R	S	S	S	R	ND	4
FD01876639	ERS12564911	651006	Shigella flexneri 2A	yes	yes	yes, merged (original and re-sequenced reads)	yes	yes	yes	Shigella flexneri serotype 2a	2013-02-27	2012	Western Cape	GRO / EDE	Stool culture	Stool	N	MALE	3	1 - 4	S	S	S	S	S	S	S	S	ND	1
FD01876640	ERS12564912	527981	Shigella flexneri 2A	yes	yes	yes, merged (original and re-sequenced reads)	yes	yes	yes	Shigella flexneri serotype 2a	2013-02-28	2011	Western Cape	WEC	Stool culture	Stool	N	MALE	76	61 - 80	R	R	R	R	S	S	S	R	ND	2
FD01876641	ERS12564913	541782	Shigella flexneri 2A	no	yes	Yes	yes	yes	yes	Shigella flexneri serotype 2a	2013-11-03	2011	Western Cape	CAT	Stool culture	Stool	N	MALE	9	5 - 10	R	R	R	R	S	S	S	R	ND	3
FD01876642	ERS12564914	556823	Shigella flexneri 2A	yes	yes	yes, merged (original and re-sequenced reads)	yes	yes	yes	Shigella flexneri serotype 2a	2013-03-01	2011	Western Cape	CAT	Stool culture	Stool	N	FEMALE	4	1 - 4	S	S	S	S	S	S	S	S	ND	1
FD01876643	ERS12564915	576219	Shigella flexneri 2A	yes	yes	yes, merged (original and re-sequenced reads)	yes	yes	yes	Shigella flexneri serotype 2a	2013-05-20	2011	Eastern Cape	AMT	Stool culture	Stool	N	FEMALE	3	1 - 4	R	R	R	R	S	S	S	R	ND	4
FD01876644	ERS12564916	604589	Shigella flexneri 2A	yes	yes	yes, merged (original and re-sequenced reads)	yes	yes	yes	Shigella flexneri serotype 2a	2013-03-02	2011	Gauteng	JBM	Stool culture	Stool	N	MALE	Unknown	Unknown	S	S	S	S	S	S	S	R	ND	1
FD01876645	ERS12564917	633964	Shigella flexneri 2A	no	yes	Yes	yes	yes	yes	Shigella flexneri serotype 2a	2013-11-04	2011	Western Cape	CAT	Stool culture	Stool	N	FEMALE	1	1 - 4	R	R	R	R	S	S	S	S	ND	3
FD01876646	NA	645887	Shigella flexneri 2A	no	yes	No	yes	yes	no	No prediction (multiple wzx)	2013-11-05	2012	Gauteng	JBM	Stool culture	Stool	N	FEMALE	Unknown	Unknown	R	R	R	R	S	S	S	R	ND	ND
FD01876647	ERS12564918	651883	Shigella flexneri 2A	no	yes	Yes	yes	yes	yes	Shigella flexneri serotype 2a	2013-11-06	2012	Northern Cape	FRB	Stool culture	Stool	N	MALE	Unknown	Unknown	R	R	R	R	S	S	S	R	ND	4
FD01876648	ERS12564919	529175	Shigella flexneri 2A	yes	yes	yes, merged (original and re-sequenced reads)	yes	yes	yes	Shigella flexneri serotype 2a	2013-03-03	2011	Eastern Cape	Unknown	Stool culture	Stool	N	MALE	45	41 - 60	R	R	R	R	S	S	S	R	ND	3
FD01876649	ERS12564920	541831	Shigella flexneri 2A	yes	yes	yes, merged (original and re-sequenced reads)	yes	yes	yes	Shigella flexneri serotype 2a	2013-03-04	2011	Western Cape	CAT	Stool culture	Stool	N	MALE	0	< 1	S	S	R	R	S	S	S	R	ND	2
FD01876650	ERS12564921	558883	Shigella flexneri 2A	no	yes	Yes	yes	yes	yes	Shigella flexneri serotype 2a	2013-11-07	2011	Gauteng	TSW	Stool culture	Stool	N	FEMALE	3	1 - 4	R	S	R	S	S	S	S	R	ND	1
FD01876651	ERS12564922	577360	Shigella flexneri 2A	no	yes	Yes	yes	yes	yes	Shigella flexneri serotype 2a	2013-11-08	2011	KwaZulu-Natal	ETH	Stool culture	Stool	N	MALE	13	11 - 20	R	R	R	R	S	S	S	R	ND	3
FD01876652	ERS12564923	621323	Shigella flexneri 2A	no	yes	Yes	yes	yes	yes	Shigella flexneri serotype 2a	2013-11-09	2011	Western Cape	CAT	Stool culture	Stool	N	FEMALE	43	41 - 60	R	R	R	R	S	S	S	R	ND	3
FD01876653	ERS12564924	633952	Shigella flexneri 2A	no	yes	Yes	yes	yes	yes	Shigella flexneri serotype 2a	2013-11-10	2012	Western Cape	CAT	Stool culture	Stool	N	MALE	4	1 - 4	R	R	R	R	S	S	S	R	ND	2
FD01876654	ERS12564925	640208	Shigella flexneri 2A	no	yes	Yes	yes	yes	yes	Shigella flexneri serotype 2a	2013-11-11	2012	KwaZulu-Natal	ETH	Stool culture	Stool	N	FEMALE	30	21 - 40	R	R	R	R	S	S	S	S	ND	2
FD01876655	ERS12564926	653723	Shigella flexneri 2A	yes	yes	yes, merged (original and re-sequenced reads)	yes	yes	yes	Shigella flexneri serotype 2a	2013-03-05	2012	Gauteng	SED	Stool culture	Stool	N	MALE	2	1 - 4	R	R	R	S	S	S	S	S	ND	3
FD01876656	ERS12564927	531365	Shigella flexneri 2A	no	yes	Yes	yes	yes	yes	Shigella flexneri serotype 2a	2013-11-12	2011	KwaZulu-Natal	Unknown	Stool culture	Stool	N	FEMALE	4	1 - 4	R	R	R	R	S	S	S	R	ND	3
FD01876657	NA	543403	Shigella flexneri 2A	no	no	No	no - ND	ND	ND	ND	2013-08-07	2011	KwaZulu-Natal	ETH	Stool culture	Stool	N	FEMALE	31	21 - 40	R	R	R	R	S	S	S	R	ND	ND
FD01876658	ERS12564928	561507	Shigella flexneri 2A	yes	yes	yes, merged (original and re-sequenced reads)	yes	yes	yes	Shigella flexneri serotype 2a	2013-03-06	2011	Gauteng	SED	Stool culture	Stool	N	MALE	1	1 - 4	R	S	S	S	S	S	S	R	ND	1
FD01876659	NA	578357	Shigella flexneri 2A	yes	yes	No	no - per base sequence content	ND	ND	ND	2013-06-06	2011	Gauteng	JBM	Stool culture	Stool	N	FEMALE	Unknown	Unknown	R	R	R	S	S	S	S	R	ND	ND
FD01876660	ERS12564929	607945/608021	Shigella flexneri 2A	yes	yes	yes, merged (original and re-sequenced reads)	yes	yes	yes	Shigella flexneri serotype 2a	2013-05-21	2011	KwaZulu-Natal	UMG	Stool culture	Stool	N	MALE	8	5 - 10	S	S	S	S	S	S	S	R	ND	1
FD01876661	ERS12564930	625511	Shigella flexneri 2A	yes	yes	yes, merged (original and re-sequenced reads)	yes	yes	yes	Shigella flexneri serotype 2a	2013-05-22	2012	Gauteng	TSW	Stool culture	Stool	N	FEMALE	4	1 - 4	R	S	R	S	S	S	S	R	ND	1
FD01876662	ERS12564931	641166	Shigella flexneri 2A	yes	yes	yes, merged (original and re-sequenced reads)	yes	yes	yes	Shigella flexneri serotype 2a	2013-03-07	2012	Western Cape	OVE	Stool culture	Stool	N	MALE	1	1 - 4	R	R	R	R	S	S	S	R	ND	4
FD01876663	ERS12564932	656169	Shigella flexneri 2A	yes	yes	yes, merged (original and re-sequenced reads)	yes	yes	yes	Shigella flexneri serotype 2a	2013-05-23	2012	Eastern Cape	AMT	Stool culture	Stool	N	MALE	Unknown	Unknown	R	R	R	R	S	S	S	R	ND	2
FD01876664	ERS12564933	533304	Shigella flexneri 2A	yes	yes	yes, merged (original and re-sequenced reads)	yes	yes	yes	Shigella flexneri serotype 2a	2013-03-08	2011	Western Cape	WEC	Stool culture	Stool	N	MALE	1	1 - 4	R	R	R	R	S	S	S	R	ND	2
FD01876665	ERS12564934	544568	Shigella flexneri 2A	yes	yes	yes, merged (original and re-sequenced reads)	yes	yes	yes	Shigella flexneri serotype 2a	2013-03-09	2011	Free State	MOT	Stool culture	Stool	N	MALE	2	1 - 4	S	S	S	S	S	S	S	R	ND	1
FD01876666	ERS12564935	562737	Shigella flexneri 2A	no	yes	Yes	yes	yes	yes	Shigella flexneri serotype 2a	2013-11-13	2011	Western Cape	CAT	Stool culture	Stool	N	FEMALE	2	1 - 4	R	R	R	R	S	S	S	R	ND	4
FD01876667	NA	579746	Shigella flexneri 2A	no	no	No	no - ND	ND	ND	ND	2013-08-08	2011	Eastern Cape	NMM	Stool culture	Stool	N	FEMALE	70	61 - 80	S	S	S	S	S	S	S	S	ND	ND
FD01876668	ERS12564936	610618	Shigella flexneri 2A	no	yes	Yes	yes	yes	yes	Shigella flexneri serotype 2a	2013-11-14	2011	KwaZulu-Natal	ETH	Stool culture	Stool	N	MALE	Unknown	Unknown	R	R	R	R	S	S	S	R	ND	3
FD01876669	ERS12564937	626670	Shigella flexneri 2A	yes	yes	yes, merged (original and re-sequenced reads)	yes	yes	yes	Shigella flexneri serotype 2a	2013-03-10	2012	Eastern Cape	NMM	Stool culture	Stool	N	MALE	30	21 - 40	R	R	R	S	S	S	S	R	ND	4
FD01876670	ERS12564938	641793	Shigella flexneri 2A	yes	yes	yes, merged (original and re-sequenced reads)	yes	yes	yes	Shigella flexneri serotype 2a	2013-03-11	2012	KwaZulu-Natal	UTU	Stool culture	Stool	N	MALE	1	1 - 4	R	R	R	R	S	S	S	R	ND	2
FD01876671	ERS12564939	658757	Shigella flexneri 2A	yes	yes	yes, merged (original and re-sequenced reads)	yes	yes	yes	Shigella flexneri serotype 2a	2013-03-12	2012	KwaZulu-Natal	UGU	Stool culture	Stool	N	FEMALE	3	1 - 4	S	S	S	S	S	S	S	R	ND	1
FD01876672	ERS12564940	534421	Shigella flexneri 2A	yes	yes	yes, merged (original and re-sequenced reads)	yes	yes	yes	Shigella flexneri serotype 2a	2013-03-13	2011	Gauteng	Unknown	Stool culture	Stool	N	MALE	Unknown	Unknown	S	S	S	S	S	S	S	R	ND	ND
FD01876673	ERS12564941	546316	Shigella flexneri 2A	no	yes	Yes	yes	yes	yes	Shigella flexneri serotype 2a	2013-11-15	2011	Western Cape	CAT	Stool culture	Stool	N	FEMALE	2	1 - 4	R	R	R	R	S	S	S	R	ND	3
FD01876674	ERS12564942	590818	Shigella flexneri 2A	yes	yes	yes, merged (original and re-sequenced reads)	yes	yes	yes	Shigella flexneri serotype 2a	2013-05-24	2011	Western Cape	CAT	Stool culture	Stool	N	MALE	2	1 - 4	S	S	S	S	S	S	S	S	ND	1
FD01876675	ERS12564943	580649	Shigella flexneri 2A	yes	yes	yes, merged (original and re-sequenced reads)	yes	yes	yes	Shigella flexneri serotype 2a	2013-05-25	2011	Western Cape	Unknown	Stool culture	Stool	N	FEMALE	3	1 - 4	R	R	R	R	S	S	S	R	ND	2
FD01876676	ERS12564944	611741	Shigella flexneri 2A	yes	yes	yes, merged (original and re-sequenced reads)	yes	yes	yes	Shigella flexneri serotype 2a	2013-05-26	2011	Eastern Cape	AMT	Stool culture	Stool	N	FEMALE	3	1 - 4	R	R	R	R	S	S	S	R	ND	4
FD01876677	ERS12564945	626929	Shigella flexneri 2A	yes	yes	yes, merged (original and re-sequenced reads)	yes	yes	yes	Shigella flexneri serotype 2a	2013-03-14	2012	Gauteng	TSW	Stool culture	Stool	N	FEMALE	2	1 - 4	R	R	R	R	S	S	S	R	ND	3
FD01876678	ERS12564946	642963	Shigella flexneri 2A	no	yes	Yes	yes	yes	yes	Shigella flexneri serotype 2a	2013-11-16	2012	Gauteng	Unknown	Stool culture	Stool	N	FEMALE	Unknown	Unknown	R	R	R	R	S	S	S	R	ND	4
FD01876679	ERS12564947	659610	Shigella flexneri 2A	yes	yes	yes, merged (original and re-sequenced reads)	yes	yes	yes	Shigella flexneri serotype 2a	2013-03-15	2012	Gauteng	JBM	Stool culture	Stool	N	MALE	10	5 - 10	R	R	R	R	S	S	S	R	ND	2
FD01876680	ERS12564948	536074	Shigella flexneri 2A	yes	yes	yes, merged (original and re-sequenced reads)	yes	yes	yes	Shigella flexneri serotype 2a	2013-05-27	2011	Gauteng	JBM	Fluid	PUS	N	FEMALE	24	21 - 40	R	R	R	R	S	S	S	R	ND	2
FD01876681	ERS12564949	546629	Shigella flexneri 2A	no	yes	Yes	yes	yes	yes	Shigella flexneri serotype 2a	2013-11-17	2011	Gauteng	Unknown	Stool culture	Stool	N	MALE	0	< 1	R	R	R	R	S	S	S	S	ND	3
FD01876682	ERS12564950	567412	Shigella flexneri 2A	yes	yes	yes, merged (original and re-sequenced reads)	yes	yes	yes	Shigella flexneri serotype 2a	2013-03-16	2011	Eastern Cape	CHA	Stool culture	Stool	N	FEMALE	3	1 - 4	R	R	R	R	S	S	S	R	ND	2
FD01876683	ERS12564951	584382	Shigella flexneri 2A	no	yes	Yes	yes	yes	yes	Shigella flexneri serotype 2a	2013-11-18	2011	Western Cape	Unknown	Fluid	PUS	N	FEMALE	24	21 - 40	R	S	S	S	S	S	S	S	ND	1
FD01876684	ERS12564952	615014	Shigella flexneri 2A	yes	yes	yes, merged (original and re-sequenced reads)	yes	yes	yes	Shigella flexneri serotype 2a	2013-03-17	2011	Eastern Cape	AMT	Stool culture	Stool	N	MALE	Unknown	Unknown	R	R	R	R	S	S	S	R	ND	2
FD01876685	ERS12564953	628449	Shigella flexneri 2A	yes	yes	yes, merged (original and re-sequenced reads)	yes	yes	yes	Shigella flexneri serotype 2a	2013-03-18	2012	Gauteng	JBM	Stool culture	Stool	N	MALE	Unknown	Unknown	R	R	R	R	S	S	S	R	ND	2
FD01876686	ERS12564954	643856	Shigella flexneri 2A	yes	yes	yes, merged (original and re-sequenced reads)	yes	yes	yes	Shigella flexneri serotype 2a	2013-03-19	2012	KwaZulu-Natal	ETH	Stool culture	Stool	N	MALE	5	5 - 10	R	R	R	R	S	S	S	S	ND	2
FD01876687	ERS12564955	661235	Shigella flexneri 2A	yes	yes	yes, merged (original and re-sequenced reads)	yes	yes	yes	Shigella flexneri serotype 2a	2013-03-20	2012	Western Cape	WEC	Stool culture	Stool	N	FEMALE	24	21 - 40	R	R	R	R	S	S	S	R	ND	3
FD01876688	ERS12564956	536201	Shigella flexneri 2A	yes	yes	yes, merged (original and re-sequenced reads)	yes	yes	yes	Shigella flexneri serotype 2a	2013-05-28	2011	Western Cape	CAT	Stool culture	Stool	N	MALE	0	< 1	R	R	R	R	S	S	S	R	ND	4
FD01876689	ERS12564957	550335	Shigella flexneri 2A	no	yes	Yes	yes	yes	yes	Shigella flexneri serotype 2a	2013-11-19	2011	Free State	MOT	Stool culture	Stool	N	FEMALE	2	1 - 4	S	S	S	S	S	S	S	R	ND	1
FD01876690	ERS12564958	568128	Shigella flexneri 2A	no	yes	Yes	yes	yes	yes	Shigella flexneri serotype 2a	2013-11-20	2011	Mpumalanga	EAV / GSI	Stool culture	Stool	N	FEMALE	0	< 1	R	R	R	R	S	S	S	S	ND	2
FD01876691	ERS12564959	587125	Shigella flexneri 2A	no	yes	Yes	yes	yes	yes	Shigella flexneri serotype 2a	2013-11-21	2011	Western Cape	WEC	Stool culture	Stool	N	FEMALE	1	1 - 4	R	S	R	R	S	S	S	R	ND	3
FD01876692	ERS12564960	616491	Shigella flexneri 2A	no	yes	Yes	yes	yes	yes	Shigella flexneri serotype 2a	2013-11-22	2011	Western Cape	Unknown	Stool culture	Stool	N	MALE	37	21 - 40	R	R	R	R	S	S	S	R	ND	4
FD01876693	NA	627467	Shigella flexneri 2A	no	no	No	no - ND	ND	ND	ND	2013-08-09	2012	Eastern Cape	NMM	Stool culture	Stool	N	FEMALE	0	< 1	R	R	R	R	S	S	S	S	ND	ND
FD01876694	NA	645073	Shigella flexneri 2A	no	yes	No	yes	no - <20 coverage	ND	ND	2013-05-29	2012	Gauteng	JBM	Stool culture	Stool	N	MALE	0	< 1	R	S	R	R	S	S	R	R	ND	ND
FD01876695	ERS12564961	665118	Shigella flexneri 2A	yes	yes	No	yes	yes	no	No prediction (multiple wzx)	2013-03-21	2012	Western Cape	Unknown	Stool culture	Stool	N	FEMALE	7	5 - 10	R	R	R	S	S	S	S	R	ND	3

## Sheet: flexneri read QC
Sample	Filename	Original or resequenced	File type	Encoding	Total Sequences	Sequences flagged as poor quality	Sequence length	%GC	total_deduplicated_percentage	avg_sequence_length	basic_statistics	per_base_sequence_quality	per_tile_sequence_quality	per_sequence_quality_scores	per_base_sequence_content	per_sequence_gc_content	per_base_n_content	sequence_length_distribution	sequence_duplication_levels	overrepresented_sequences	adapter_content
FD01872847.for.paired	FD01872847.for.paired	Original	Conventional base calls	Sanger / Illumina 1.9	384650	0	0-143	50	82.6513	140.969	pass	pass	pass	pass	warn	warn	pass	fail	pass	pass	pass
FD01872847.rev.paired	FD01872847.rev.paired	Original	Conventional base calls	Sanger / Illumina 1.9	384650	0	0-143	50	84.6044	140.211	pass	pass	pass	pass	warn	warn	pass	fail	pass	pass	pass
FD01872848.for.paired	FD01872848.for.paired	Original	Conventional base calls	Sanger / Illumina 1.9	508222	0	0-143	50	80.088	141.109	pass	pass	pass	pass	fail	warn	pass	fail	pass	pass	pass
FD01872848.rev.paired	FD01872848.rev.paired	Original	Conventional base calls	Sanger / Illumina 1.9	508222	0	0-143	50	81.8032	140.319	pass	pass	pass	pass	fail	warn	pass	fail	pass	pass	pass
FD01872849.for.paired	FD01872849.for.paired	Original	Conventional base calls	Sanger / Illumina 1.9	491712	0	0-143	50	79.7467	140.847	pass	pass	pass	pass	fail	fail	pass	fail	pass	pass	pass
FD01872849.rev.paired	FD01872849.rev.paired	Original	Conventional base calls	Sanger / Illumina 1.9	491712	0	0-143	50	81.5241	140.179	pass	pass	pass	pass	fail	warn	pass	fail	pass	pass	pass
FD01872850.for.paired	FD01872850.for.paired	Original	Conventional base calls	Sanger / Illumina 1.9	345894	0	0-143	49	85.9987	141.022	pass	pass	pass	pass	fail	fail	pass	fail	pass	pass	pass
FD01872850.rev.paired	FD01872850.rev.paired	Original	Conventional base calls	Sanger / Illumina 1.9	345894	0	0-143	49	87.4664	139.845	pass	pass	pass	pass	warn	fail	pass	fail	pass	pass	pass
FD01872851.for.paired	FD01872851.for.paired	Original	Conventional base calls	Sanger / Illumina 1.9	455776	0	0-143	49	83.1275	140.965	pass	pass	pass	pass	fail	fail	pass	fail	pass	pass	pass
FD01872851.rev.paired	FD01872851.rev.paired	Original	Conventional base calls	Sanger / Illumina 1.9	455776	0	0-143	49	84.6321	140.135	pass	pass	pass	pass	fail	fail	pass	fail	pass	pass	pass
FD01872852.for.paired	FD01872852.for.paired	Original	Conventional base calls	Sanger / Illumina 1.9	411229	0	0-143	50	87.5083	141.049	pass	pass	pass	pass	fail	warn	pass	fail	pass	pass	pass
FD01872852.rev.paired	FD01872852.rev.paired	Original	Conventional base calls	Sanger / Illumina 1.9	411229	0	0-143	50	88.57	140.162	pass	pass	pass	pass	warn	warn	pass	fail	pass	pass	pass
FD01872853.for.paired	FD01872853.for.paired	Original	Conventional base calls	Sanger / Illumina 1.9	451789	0	0-143	49	83.6722	140.926	pass	pass	pass	pass	warn	fail	pass	fail	pass	pass	pass
FD01872853.rev.paired	FD01872853.rev.paired	Original	Conventional base calls	Sanger / Illumina 1.9	451789	0	0-143	49	85.43	139.941	pass	pass	pass	pass	warn	fail	pass	fail	pass	pass	pass
FD01872854.for.paired	FD01872854.for.paired	Original	Conventional base calls	Sanger / Illumina 1.9	382655	0	0-143	48	84.0964	140.536	pass	pass	pass	pass	warn	fail	pass	fail	pass	pass	pass
FD01872854.rev.paired	FD01872854.rev.paired	Original	Conventional base calls	Sanger / Illumina 1.9	382655	0	0-143	48	85.7906	139.714	pass	pass	pass	pass	warn	fail	pass	fail	pass	pass	pass
FD01872855.for.paired	FD01872855.for.paired	Original	Conventional base calls	Sanger / Illumina 1.9	474012	0	0-143	50	80.7795	140.82	pass	pass	warn	pass	fail	warn	pass	fail	pass	pass	pass
FD01872855.rev.paired	FD01872855.rev.paired	Original	Conventional base calls	Sanger / Illumina 1.9	474012	0	0-143	50	83.2292	139.741	pass	pass	pass	pass	warn	warn	pass	fail	pass	pass	pass
FD01872856.for.paired	FD01872856.for.paired	Original	Conventional base calls	Sanger / Illumina 1.9	554266	0	0-143	50	78.7631	141.257	pass	pass	pass	pass	fail	warn	pass	fail	pass	pass	pass
FD01872856.rev.paired	FD01872856.rev.paired	Original	Conventional base calls	Sanger / Illumina 1.9	554266	0	0-143	50	80.8598	140.311	pass	pass	pass	pass	warn	warn	pass	fail	pass	pass	pass
FD01872857.for.paired	FD01872857.for.paired	Original	Conventional base calls	Sanger / Illumina 1.9	562159	0	0-143	50	78.7889	140.903	pass	pass	pass	pass	fail	warn	pass	fail	pass	pass	pass
FD01872857.rev.paired	FD01872857.rev.paired	Original	Conventional base calls	Sanger / Illumina 1.9	562159	0	0-143	50	81.305	139.749	pass	pass	pass	pass	fail	warn	pass	fail	pass	pass	pass
FD01872858.for.paired	FD01872858.for.paired	Original	Conventional base calls	Sanger / Illumina 1.9	365159	0	0-143	49	85.7227	140.859	pass	pass	pass	pass	fail	fail	pass	fail	pass	pass	pass
FD01872858.rev.paired	FD01872858.rev.paired	Original	Conventional base calls	Sanger / Illumina 1.9	365159	0	0-143	49	87.2764	139.954	pass	pass	pass	pass	warn	fail	pass	fail	pass	pass	pass
FD01872859.for.paired	FD01872859.for.paired	Original	Conventional base calls	Sanger / Illumina 1.9	574169	0	0-143	50	78.0817	141.12	pass	pass	pass	pass	fail	warn	pass	fail	pass	pass	pass
FD01872859.rev.paired	FD01872859.rev.paired	Original	Conventional base calls	Sanger / Illumina 1.9	574169	0	0-143	50	80.2534	139.965	pass	pass	pass	pass	fail	warn	pass	fail	pass	pass	pass
FD01872860.for.paired	FD01872860.for.paired	Original	Conventional base calls	Sanger / Illumina 1.9	533288	0	0-143	49	83.4672	140.88	pass	pass	pass	pass	warn	fail	pass	fail	pass	pass	pass
FD01872860.rev.paired	FD01872860.rev.paired	Original	Conventional base calls	Sanger / Illumina 1.9	533288	0	0-143	49	85.0312	140.113	pass	pass	pass	pass	warn	fail	pass	fail	pass	pass	pass
FD01872861.for.paired	FD01872861.for.paired	Original	Conventional base calls	Sanger / Illumina 1.9	301541	0	0-143	49	87.1147	140.92	pass	pass	pass	pass	fail	fail	pass	fail	pass	pass	pass
FD01872861.rev.paired	FD01872861.rev.paired	Original	Conventional base calls	Sanger / Illumina 1.9	301541	0	0-143	49	88.7976	139.783	pass	pass	pass	pass	warn	fail	pass	fail	pass	pass	pass
FD01872862.for.paired	FD01872862.for.paired	Original	Conventional base calls	Sanger / Illumina 1.9	300820	0	0-143	48	81.716	140.887	pass	pass	pass	pass	warn	warn	pass	fail	pass	pass	pass
FD01872862.rev.paired	FD01872862.rev.paired	Original	Conventional base calls	Sanger / Illumina 1.9	300820	0	0-143	48	83.5047	139.987	pass	pass	pass	pass	warn	pass	pass	fail	pass	pass	pass
FD01872863.for.paired	FD01872863.for.paired	Original	Conventional base calls	Sanger / Illumina 1.9	512434	0	0-143	50	80.3579	141.09	pass	pass	pass	pass	fail	warn	pass	fail	pass	pass	pass
FD01872863.rev.paired	FD01872863.rev.paired	Original	Conventional base calls	Sanger / Illumina 1.9	512434	0	0-143	50	82.3851	140.17	pass	pass	pass	pass	warn	warn	pass	fail	pass	pass	pass
FD01872864.for.paired	FD01872864.for.paired	Original	Conventional base calls	Sanger / Illumina 1.9	854584	0	0-143	45	79.0639	136.721	pass	pass	pass	pass	fail	warn	pass	fail	pass	warn	pass
FD01872864.rev.paired	FD01872864.rev.paired	Original	Conventional base calls	Sanger / Illumina 1.9	854584	0	0-143	45	81.6081	137.527	pass	pass	pass	pass	fail	pass	pass	fail	pass	pass	pass
FD01872865.for.paired	FD01872865.for.paired	Original	Conventional base calls	Sanger / Illumina 1.9	477947	0	0-143	50	80.8444	141.136	pass	pass	pass	pass	fail	warn	pass	fail	pass	pass	pass
FD01872865.rev.paired	FD01872865.rev.paired	Original	Conventional base calls	Sanger / Illumina 1.9	477947	0	0-143	50	83.084	140.041	pass	pass	pass	pass	fail	warn	pass	fail	pass	pass	pass
FD01872866.for.paired	FD01872866.for.paired	Original	Conventional base calls	Sanger / Illumina 1.9	537905	0	0-143	49	81.6805	140.598	pass	pass	pass	pass	fail	fail	pass	fail	pass	pass	pass
FD01872866.rev.paired	FD01872866.rev.paired	Original	Conventional base calls	Sanger / Illumina 1.9	537905	0	0-143	49	83.7129	139.859	pass	pass	pass	pass	warn	fail	pass	fail	pass	pass	pass
FD01872867.for.paired	FD01872867.for.paired	Original	Conventional base calls	Sanger / Illumina 1.9	409718	0	0-143	49	84.4886	140.847	pass	pass	pass	pass	fail	fail	pass	fail	pass	pass	pass
FD01872867.rev.paired	FD01872867.rev.paired	Original	Conventional base calls	Sanger / Illumina 1.9	409718	0	0-143	49	86.1978	140.064	pass	pass	pass	pass	warn	fail	pass	fail	pass	pass	pass
FD01872868.for.paired	FD01872868.for.paired	Original	Conventional base calls	Sanger / Illumina 1.9	454595	0	0-143	49	85.2951	140.997	pass	pass	pass	pass	warn	fail	pass	fail	pass	pass	pass
FD01872868.rev.paired	FD01872868.rev.paired	Original	Conventional base calls	Sanger / Illumina 1.9	454595	0	0-143	49	86.7461	140.054	pass	pass	pass	pass	warn	fail	pass	fail	pass	pass	pass
FD01872869.for.paired	FD01872869.for.paired	Original	Conventional base calls	Sanger / Illumina 1.9	443819	0	0-143	49	86.0115	140.619	pass	pass	pass	pass	warn	fail	pass	fail	pass	pass	pass
FD01872869.rev.paired	FD01872869.rev.paired	Original	Conventional base calls	Sanger / Illumina 1.9	443819	0	0-143	49	87.2732	140.026	pass	pass	pass	pass	warn	fail	pass	fail	pass	pass	pass
FD01872870.for.paired	FD01872870.for.paired	Original	Conventional base calls	Sanger / Illumina 1.9	419327	0	0-143	49	85.9224	140.742	pass	pass	pass	pass	warn	fail	pass	fail	pass	pass	pass
FD01872870.rev.paired	FD01872870.rev.paired	Original	Conventional base calls	Sanger / Illumina 1.9	419327	0	0-143	49	87.2952	140.006	pass	pass	pass	pass	warn	fail	pass	fail	pass	pass	pass
FD01872871.for.paired	FD01872871.for.paired	Original	Conventional base calls	Sanger / Illumina 1.9	523912	0	0-143	50	79.8975	140.978	pass	pass	pass	pass	fail	warn	pass	fail	pass	pass	pass
FD01872871.rev.paired	FD01872871.rev.paired	Original	Conventional base calls	Sanger / Illumina 1.9	523912	0	0-143	50	82.0415	140.167	pass	pass	pass	pass	warn	warn	pass	fail	pass	pass	pass
FD01872872.for.paired	FD01872872.for.paired	Original	Conventional base calls	Sanger / Illumina 1.9	562299	0	0-143	50	77.77	141.044	pass	pass	pass	pass	fail	warn	pass	fail	pass	pass	pass
FD01872872.rev.paired	FD01872872.rev.paired	Original	Conventional base calls	Sanger / Illumina 1.9	562299	0	0-143	50	80.1775	139.903	pass	pass	pass	pass	fail	warn	pass	fail	pass	pass	pass
FD01872873.for.paired	FD01872873.for.paired	Original	Conventional base calls	Sanger / Illumina 1.9	738141	0	0-143	51	76.9376	140.959	pass	pass	pass	pass	fail	warn	pass	fail	pass	pass	pass
FD01872873.rev.paired	FD01872873.rev.paired	Original	Conventional base calls	Sanger / Illumina 1.9	738141	0	0-143	50	79.1375	140.145	pass	pass	pass	pass	fail	warn	pass	fail	pass	pass	pass
FD01872874.for.paired	FD01872874.for.paired	Original	Conventional base calls	Sanger / Illumina 1.9	443244	0	0-143	49	83.7907	140.758	pass	pass	pass	pass	fail	fail	pass	fail	pass	pass	pass
FD01872874.rev.paired	FD01872874.rev.paired	Original	Conventional base calls	Sanger / Illumina 1.9	443244	0	0-143	49	85.5534	139.871	pass	pass	pass	pass	warn	fail	pass	fail	pass	pass	pass
FD01872875.for.paired	FD01872875.for.paired	Original	Conventional base calls	Sanger / Illumina 1.9	502770	0	0-143	49	82.437	140.735	pass	pass	pass	pass	fail	fail	pass	fail	pass	pass	pass
FD01872875.rev.paired	FD01872875.rev.paired	Original	Conventional base calls	Sanger / Illumina 1.9	502770	0	0-143	49	83.9976	140.04	pass	pass	pass	pass	fail	fail	pass	fail	pass	pass	pass
FD01872876.for.paired	FD01872876.for.paired	Original	Conventional base calls	Sanger / Illumina 1.9	421485	0	0-143	50	83.8706	140.642	pass	pass	pass	pass	warn	fail	pass	fail	pass	pass	pass
FD01872876.rev.paired	FD01872876.rev.paired	Original	Conventional base calls	Sanger / Illumina 1.9	421485	0	0-143	49	85.4276	140.116	pass	pass	pass	pass	warn	warn	pass	fail	pass	pass	pass
FD01872877.for.paired	FD01872877.for.paired	Original	Conventional base calls	Sanger / Illumina 1.9	434207	0	0-143	50	85.3473	139.894	pass	pass	pass	pass	warn	fail	pass	fail	pass	warn	pass
FD01872877.rev.paired	FD01872877.rev.paired	Original	Conventional base calls	Sanger / Illumina 1.9	434207	0	0-143	50	86.8056	139.53	pass	pass	pass	pass	warn	warn	pass	fail	pass	pass	pass
FD01872878.for.paired	FD01872878.for.paired	Original	Conventional base calls	Sanger / Illumina 1.9	413186	0	0-143	49	85.6112	140.209	pass	pass	pass	pass	warn	fail	pass	fail	pass	warn	pass
FD01872878.rev.paired	FD01872878.rev.paired	Original	Conventional base calls	Sanger / Illumina 1.9	413186	0	0-143	49	86.8738	139.814	pass	pass	pass	pass	warn	warn	pass	fail	pass	pass	pass
FD01872879.for.paired	FD01872879.for.paired	Original	Conventional base calls	Sanger / Illumina 1.9	490984	0	0-143	50	81.1631	139.848	pass	pass	pass	pass	warn	fail	pass	fail	pass	warn	pass
FD01872879.rev.paired	FD01872879.rev.paired	Original	Conventional base calls	Sanger / Illumina 1.9	490984	0	0-143	50	83.2436	139.16	pass	pass	pass	pass	warn	warn	pass	fail	pass	pass	pass
FD01872880.for.paired	FD01872880.for.paired	Original	Conventional base calls	Sanger / Illumina 1.9	491862	0	0-143	50	81.1992	141.01	pass	pass	pass	pass	fail	warn	pass	fail	pass	pass	pass
FD01872880.rev.paired	FD01872880.rev.paired	Original	Conventional base calls	Sanger / Illumina 1.9	491862	0	0-143	50	82.9031	140.287	pass	pass	pass	pass	warn	warn	pass	fail	pass	pass	pass
FD01872881.for.paired	FD01872881.for.paired	Original	Conventional base calls	Sanger / Illumina 1.9	456535	0	0-143	50	80.94	140.587	pass	pass	pass	pass	fail	fail	pass	fail	pass	warn	pass
FD01872881.rev.paired	FD01872881.rev.paired	Original	Conventional base calls	Sanger / Illumina 1.9	456535	0	0-143	50	83.1493	139.637	pass	pass	pass	pass	warn	warn	pass	fail	pass	pass	pass
FD01872882.for.paired	FD01872882.for.paired	Original	Conventional base calls	Sanger / Illumina 1.9	537440	0	0-143	49	81.3089	140.49	pass	pass	pass	pass	warn	fail	pass	fail	pass	pass	pass
FD01872882.rev.paired	FD01872882.rev.paired	Original	Conventional base calls	Sanger / Illumina 1.9	537440	0	0-143	49	83.4775	139.592	pass	pass	pass	pass	warn	fail	pass	fail	pass	pass	pass
FD01872883.for.paired	FD01872883.for.paired	Original	Conventional base calls	Sanger / Illumina 1.9	333519	0	0-143	50	86.3071	140.409	pass	pass	pass	pass	warn	fail	pass	fail	pass	pass	pass
FD01872883.rev.paired	FD01872883.rev.paired	Original	Conventional base calls	Sanger / Illumina 1.9	333519	0	0-143	50	87.6653	139.986	pass	pass	pass	pass	warn	warn	pass	fail	pass	pass	pass
FD01872884.for.paired	FD01872884.for.paired	Original	Conventional base calls	Sanger / Illumina 1.9	439612	0	0-143	49	83.5325	140.622	pass	pass	pass	pass	fail	fail	pass	fail	pass	pass	pass
FD01872884.rev.paired	FD01872884.rev.paired	Original	Conventional base calls	Sanger / Illumina 1.9	439612	0	0-143	49	85.4155	140.033	pass	pass	pass	pass	warn	warn	pass	fail	pass	pass	pass
FD01872885.for.paired	FD01872885.for.paired	Original	Conventional base calls	Sanger / Illumina 1.9	538460	0	0-143	50	82.4651	140.28	pass	pass	pass	pass	warn	fail	pass	fail	pass	pass	pass
FD01872885.rev.paired	FD01872885.rev.paired	Original	Conventional base calls	Sanger / Illumina 1.9	538460	0	0-143	50	84.0344	139.951	pass	pass	pass	pass	warn	warn	pass	fail	pass	pass	pass
FD01872886.for.paired	FD01872886.for.paired	Original	Conventional base calls	Sanger / Illumina 1.9	327060	0	0-143	48	81.0635	139.57	pass	pass	pass	pass	fail	fail	pass	fail	pass	warn	pass
FD01872886.rev.paired	FD01872886.rev.paired	Original	Conventional base calls	Sanger / Illumina 1.9	327060	0	0-143	48	82.4652	139.45	pass	pass	pass	pass	fail	fail	pass	fail	pass	pass	pass
FD01872887.for.paired	FD01872887.for.paired	Original	Conventional base calls	Sanger / Illumina 1.9	650132	0	0-143	50	78.0637	140.903	pass	pass	pass	pass	warn	warn	pass	fail	pass	pass	pass
FD01872887.rev.paired	FD01872887.rev.paired	Original	Conventional base calls	Sanger / Illumina 1.9	650132	0	0-143	50	80.5206	139.944	pass	pass	pass	pass	warn	warn	pass	fail	pass	pass	pass
FD01872888.for.paired	FD01872888.for.paired	Original	Conventional base calls	Sanger / Illumina 1.9	449695	0	0-143	50	80.9743	141.126	pass	pass	pass	pass	fail	warn	pass	fail	pass	pass	pass
FD01872888.rev.paired	FD01872888.rev.paired	Original	Conventional base calls	Sanger / Illumina 1.9	449695	0	0-143	50	82.5223	140.358	pass	pass	pass	pass	warn	warn	pass	fail	pass	pass	pass
FD01872889.for.paired	FD01872889.for.paired	Original	Conventional base calls	Sanger / Illumina 1.9	417216	0	0-143	50	82.7281	140.253	pass	pass	warn	pass	fail	fail	pass	fail	pass	pass	pass
FD01872889.rev.paired	FD01872889.rev.paired	Original	Conventional base calls	Sanger / Illumina 1.9	417216	0	0-143	50	84.4527	139.755	pass	pass	pass	pass	fail	warn	pass	fail	pass	pass	pass
FD01872890.for.paired	FD01872890.for.paired	Original	Conventional base calls	Sanger / Illumina 1.9	371754	0	0-143	49	85.7347	140.386	pass	pass	pass	pass	warn	fail	pass	fail	pass	pass	pass
FD01872890.rev.paired	FD01872890.rev.paired	Original	Conventional base calls	Sanger / Illumina 1.9	371754	0	0-143	49	87.4824	139.78	pass	pass	pass	pass	warn	fail	pass	fail	pass	pass	pass
FD01872891.for.paired	FD01872891.for.paired	Original	Conventional base calls	Sanger / Illumina 1.9	437872	0	0-143	49	83.6877	140.963	pass	pass	pass	pass	fail	fail	pass	fail	pass	pass	pass
FD01872891.rev.paired	FD01872891.rev.paired	Original	Conventional base calls	Sanger / Illumina 1.9	437872	0	0-143	49	85.2145	140.138	pass	pass	pass	pass	warn	fail	pass	fail	pass	pass	pass
FD01872892.for.paired	FD01872892.for.paired	Original	Conventional base calls	Sanger / Illumina 1.9	488424	0	0-143	49	82.7745	140.24	pass	pass	pass	pass	warn	fail	pass	fail	pass	warn	pass
FD01872892.rev.paired	FD01872892.rev.paired	Original	Conventional base calls	Sanger / Illumina 1.9	488424	0	0-143	49	84.5212	139.591	pass	pass	pass	pass	warn	fail	pass	fail	pass	pass	pass
FD01872893.for.paired	FD01872893.for.paired	Original	Conventional base calls	Sanger / Illumina 1.9	475365	0	0-143	50	83.8963	139.914	pass	pass	pass	pass	fail	fail	pass	fail	pass	warn	pass
FD01872893.rev.paired	FD01872893.rev.paired	Original	Conventional base calls	Sanger / Illumina 1.9	475365	0	0-143	50	85.364	139.637	pass	pass	pass	pass	warn	warn	pass	fail	pass	pass	pass
FD01872894.for.paired	FD01872894.for.paired	Original	Conventional base calls	Sanger / Illumina 1.9	529617	0	0-143	50	78.3455	140.898	pass	pass	pass	pass	fail	warn	pass	fail	pass	pass	pass
FD01872894.rev.paired	FD01872894.rev.paired	Original	Conventional base calls	Sanger / Illumina 1.9	529617	0	0-143	50	81.0848	139.347	pass	pass	pass	pass	warn	warn	pass	fail	pass	pass	pass
FD01872895.for.paired	FD01872895.for.paired	Original	Conventional base calls	Sanger / Illumina 1.9	467212	0	0-143	50	80.453	141.137	pass	pass	pass	pass	fail	warn	pass	fail	pass	pass	pass
FD01872895.rev.paired	FD01872895.rev.paired	Original	Conventional base calls	Sanger / Illumina 1.9	467212	0	0-143	50	82.2164	140.21	pass	pass	pass	pass	fail	warn	pass	fail	pass	pass	pass
FD01872896.for.paired	FD01872896.for.paired	Original	Conventional base calls	Sanger / Illumina 1.9	455575	0	0-143	50	80.8424	141.303	pass	pass	pass	pass	fail	warn	pass	fail	pass	pass	pass
FD01872896.rev.paired	FD01872896.rev.paired	Original	Conventional base calls	Sanger / Illumina 1.9	455575	0	0-143	50	82.8066	140.267	pass	pass	pass	pass	fail	warn	pass	fail	pass	pass	pass
FD01872897.for.paired	FD01872897.for.paired	Original	Conventional base calls	Sanger / Illumina 1.9	475112	0	0-143	49	82.8751	140.515	pass	pass	pass	pass	fail	fail	pass	fail	pass	pass	pass
FD01872897.rev.paired	FD01872897.rev.paired	Original	Conventional base calls	Sanger / Illumina 1.9	475112	0	0-143	49	84.7277	139.985	pass	pass	pass	pass	warn	fail	pass	fail	pass	pass	pass
FD01872898.for.paired	FD01872898.for.paired	Original	Conventional base calls	Sanger / Illumina 1.9	562104	0	0-143	49	80.9683	140.925	pass	pass	pass	pass	fail	fail	pass	fail	pass	pass	pass
FD01872898.rev.paired	FD01872898.rev.paired	Original	Conventional base calls	Sanger / Illumina 1.9	562104	0	0-143	49	82.655	140.16	pass	pass	pass	pass	fail	fail	pass	fail	pass	pass	pass
FD01872899.for.paired	FD01872899.for.paired	Original	Conventional base calls	Sanger / Illumina 1.9	475468	0	0-143	49	83.7318	140.587	pass	pass	pass	pass	warn	fail	pass	fail	pass	pass	pass
FD01872899.rev.paired	FD01872899.rev.paired	Original	Conventional base calls	Sanger / Illumina 1.9	475468	0	0-143	49	85.3497	139.884	pass	pass	pass	pass	warn	fail	pass	fail	pass	pass	pass
FD01872900.for.paired	FD01872900.for.paired	Original	Conventional base calls	Sanger / Illumina 1.9	378079	0	0-143	50	88.4736	140.868	pass	pass	pass	pass	warn	fail	pass	fail	pass	pass	pass
FD01872900.rev.paired	FD01872900.rev.paired	Original	Conventional base calls	Sanger / Illumina 1.9	378079	0	0-143	50	89.6322	140.085	pass	pass	pass	pass	warn	warn	pass	fail	pass	pass	pass
FD01872901.for.paired	FD01872901.for.paired	Original	Conventional base calls	Sanger / Illumina 1.9	469622	0	0-143	49	83.4805	140.654	pass	pass	pass	pass	warn	fail	pass	fail	pass	pass	pass
FD01872901.rev.paired	FD01872901.rev.paired	Original	Conventional base calls	Sanger / Illumina 1.9	469622	0	0-143	49	85.1839	139.938	pass	pass	pass	pass	warn	fail	pass	fail	pass	pass	pass
FD01872902.for.paired	FD01872902.for.paired	Original	Conventional base calls	Sanger / Illumina 1.9	410203	0	0-143	50	81.7048	140.772	pass	pass	pass	pass	fail	warn	pass	fail	pass	pass	pass
FD01872902.rev.paired	FD01872902.rev.paired	Original	Conventional base calls	Sanger / Illumina 1.9	410203	0	0-143	50	83.8471	139.849	pass	pass	pass	pass	warn	warn	pass	fail	pass	pass	pass
FD01872903.for.paired	FD01872903.for.paired	Original	Conventional base calls	Sanger / Illumina 1.9	426346	0	0-143	50	82.4869	141.056	pass	pass	pass	pass	fail	warn	pass	fail	pass	pass	pass
FD01872903.rev.paired	FD01872903.rev.paired	Original	Conventional base calls	Sanger / Illumina 1.9	426346	0	0-143	50	84.2902	139.989	pass	pass	pass	pass	warn	warn	pass	fail	pass	pass	pass
FD01872904.for.paired	FD01872904.for.paired	Original	Conventional base calls	Sanger / Illumina 1.9	432002	0	0-143	50	81.985	141.237	pass	pass	pass	pass	warn	warn	pass	fail	pass	pass	pass
FD01872904.rev.paired	FD01872904.rev.paired	Original	Conventional base calls	Sanger / Illumina 1.9	432002	0	0-143	50	83.5437	140.51	pass	pass	pass	pass	warn	warn	pass	fail	pass	pass	pass
FD01872905.for.paired	FD01872905.for.paired	Original	Conventional base calls	Sanger / Illumina 1.9	545485	0	0-143	50	78.3966	140.874	pass	pass	pass	pass	fail	fail	pass	fail	pass	pass	pass
FD01872905.rev.paired	FD01872905.rev.paired	Original	Conventional base calls	Sanger / Illumina 1.9	545485	0	0-143	49	81.5809	138.999	pass	pass	pass	pass	warn	warn	pass	fail	pass	pass	pass
FD01872906.for.paired	FD01872906.for.paired	Original	Conventional base calls	Sanger / Illumina 1.9	419666	0	0-143	50	85.3761	140.418	pass	pass	pass	pass	warn	fail	pass	fail	pass	pass	pass
FD01872906.rev.paired	FD01872906.rev.paired	Original	Conventional base calls	Sanger / Illumina 1.9	419666	0	0-143	50	86.8789	139.951	pass	pass	pass	pass	warn	warn	pass	fail	pass	pass	pass
FD01872907.for.paired	FD01872907.for.paired	Original	Conventional base calls	Sanger / Illumina 1.9	412253	0	0-143	50	86.1611	140.171	pass	pass	pass	pass	warn	fail	pass	fail	pass	warn	pass
FD01872907.rev.paired	FD01872907.rev.paired	Original	Conventional base calls	Sanger / Illumina 1.9	412253	0	0-143	50	87.5406	139.614	pass	pass	pass	pass	warn	warn	pass	fail	pass	pass	pass
FD01872908.for.paired	FD01872908.for.paired	Original	Conventional base calls	Sanger / Illumina 1.9	433692	0	0-143	50	85.2783	140.272	pass	pass	pass	pass	warn	fail	pass	fail	pass	pass	pass
FD01872908.rev.paired	FD01872908.rev.paired	Original	Conventional base calls	Sanger / Illumina 1.9	433692	0	0-143	50	86.6969	139.809	pass	pass	pass	pass	warn	warn	pass	fail	pass	pass	pass
FD01872909.for.paired	FD01872909.for.paired	Original	Conventional base calls	Sanger / Illumina 1.9	541592	0	0-143	50	85.1146	140.053	pass	pass	pass	pass	warn	fail	pass	fail	pass	warn	pass
FD01872909.rev.paired	FD01872909.rev.paired	Original	Conventional base calls	Sanger / Illumina 1.9	541592	0	0-143	50	86.5841	139.688	pass	pass	pass	pass	warn	warn	pass	fail	pass	pass	pass
FD01872910.for.paired	FD01872910.for.paired	Original	Conventional base calls	Sanger / Illumina 1.9	575286	0	0-143	50	78.7509	141.026	pass	pass	pass	pass	fail	warn	pass	fail	pass	pass	pass
FD01872910.rev.paired	FD01872910.rev.paired	Original	Conventional base calls	Sanger / Illumina 1.9	575286	0	0-143	50	80.9367	140.093	pass	pass	pass	pass	fail	warn	pass	fail	pass	pass	pass
FD01872911.for.paired	FD01872911.for.paired	Original	Conventional base calls	Sanger / Illumina 1.9	496220	0	0-143	50	80.2074	141.191	pass	pass	pass	pass	fail	warn	pass	fail	pass	pass	pass
FD01872911.rev.paired	FD01872911.rev.paired	Original	Conventional base calls	Sanger / Illumina 1.9	496220	0	0-143	50	82.2709	140.359	pass	pass	pass	pass	fail	warn	pass	fail	pass	pass	pass
FD01872912.for.paired	FD01872912.for.paired	Original	Conventional base calls	Sanger / Illumina 1.9	561139	0	0-143	50	79.7568	141.174	pass	pass	pass	pass	warn	warn	pass	fail	pass	pass	pass
FD01872912.rev.paired	FD01872912.rev.paired	Original	Conventional base calls	Sanger / Illumina 1.9	561139	0	0-143	50	81.9176	140.209	pass	pass	pass	pass	warn	warn	pass	fail	pass	pass	pass
FD01872913.for.paired	FD01872913.for.paired	Original	Conventional base calls	Sanger / Illumina 1.9	640412	0	0-143	50	80.1109	140.537	pass	pass	pass	pass	fail	fail	pass	fail	pass	pass	pass
FD01872913.rev.paired	FD01872913.rev.paired	Original	Conventional base calls	Sanger / Illumina 1.9	640412	0	0-143	50	81.8464	140.034	pass	pass	pass	pass	warn	warn	pass	fail	pass	pass	pass
FD01872914.for.paired	FD01872914.for.paired	Original	Conventional base calls	Sanger / Illumina 1.9	506004	0	0-143	49	83.3779	140.584	pass	pass	pass	pass	warn	fail	pass	fail	pass	pass	pass
FD01872914.rev.paired	FD01872914.rev.paired	Original	Conventional base calls	Sanger / Illumina 1.9	506004	0	0-143	49	85.0781	139.829	pass	pass	pass	pass	warn	fail	pass	fail	pass	pass	pass
FD01872915.for.paired	FD01872915.for.paired	Original	Conventional base calls	Sanger / Illumina 1.9	530760	0	0-143	49	82.4984	141.1	pass	pass	pass	pass	warn	fail	pass	fail	pass	pass	pass
FD01872915.rev.paired	FD01872915.rev.paired	Original	Conventional base calls	Sanger / Illumina 1.9	530760	0	0-143	49	84.2435	139.996	pass	pass	pass	pass	warn	fail	pass	fail	pass	pass	pass
FD01872916.for.paired	FD01872916.for.paired	Original	Conventional base calls	Sanger / Illumina 1.9	408407	0	0-143	49	84.439	141.019	pass	pass	pass	pass	warn	fail	pass	fail	pass	pass	pass
FD01872916.rev.paired	FD01872916.rev.paired	Original	Conventional base calls	Sanger / Illumina 1.9	408407	0	0-143	49	86.103	139.935	pass	pass	pass	pass	warn	fail	pass	fail	pass	pass	pass
FD01872917.for.paired	FD01872917.for.paired	Original	Conventional base calls	Sanger / Illumina 1.9	490955	0	0-143	49	83.1875	140.601	pass	pass	pass	pass	fail	fail	pass	fail	pass	pass	pass
FD01872917.rev.paired	FD01872917.rev.paired	Original	Conventional base calls	Sanger / Illumina 1.9	490955	0	0-143	49	85.4157	139.894	pass	pass	pass	pass	warn	fail	pass	fail	pass	pass	pass
FD01872918.for.paired	FD01872918.for.paired	Original	Conventional base calls	Sanger / Illumina 1.9	441218	0	0-143	50	80.6276	141.124	pass	pass	pass	pass	fail	warn	pass	fail	pass	pass	pass
FD01872918.rev.paired	FD01872918.rev.paired	Original	Conventional base calls	Sanger / Illumina 1.9	441218	0	0-143	50	82.9412	139.924	pass	pass	pass	pass	fail	warn	pass	fail	pass	pass	pass
FD01872919.for.paired	FD01872919.for.paired	Original	Conventional base calls	Sanger / Illumina 1.9	550448	0	0-143	50	79.0542	141.184	pass	pass	pass	pass	fail	warn	pass	fail	pass	pass	pass
FD01872919.rev.paired	FD01872919.rev.paired	Original	Conventional base calls	Sanger / Illumina 1.9	550448	0	0-143	50	81.3462	140.102	pass	pass	pass	pass	fail	warn	pass	fail	pass	pass	pass
FD01872920.for.paired	FD01872920.for.paired	Original	Conventional base calls	Sanger / Illumina 1.9	511465	0	0-143	51	80.9335	141.141	pass	pass	pass	pass	fail	warn	pass	fail	pass	pass	pass
FD01872920.rev.paired	FD01872920.rev.paired	Original	Conventional base calls	Sanger / Illumina 1.9	511465	0	0-143	50	82.6471	140.389	pass	pass	pass	pass	warn	warn	pass	fail	pass	pass	pass
FD01872921.for.paired	FD01872921.for.paired	Original	Conventional base calls	Sanger / Illumina 1.9	446416	0	0-143	50	80.9776	140.79	pass	pass	pass	pass	fail	fail	pass	fail	pass	pass	pass
FD01872921.rev.paired	FD01872921.rev.paired	Original	Conventional base calls	Sanger / Illumina 1.9	446416	0	0-143	50	82.9753	140.021	pass	pass	pass	pass	fail	warn	pass	fail	pass	pass	pass
FD01872922.for.paired	FD01872922.for.paired	Original	Conventional base calls	Sanger / Illumina 1.9	342426	0	0-143	49	87.6824	140.89	pass	pass	pass	pass	warn	fail	pass	fail	pass	pass	pass
FD01872922.rev.paired	FD01872922.rev.paired	Original	Conventional base calls	Sanger / Illumina 1.9	342426	0	0-143	49	88.9794	140.036	pass	pass	pass	pass	warn	fail	pass	fail	pass	pass	pass
FD01872923.for.paired	FD01872923.for.paired	Original	Conventional base calls	Sanger / Illumina 1.9	390137	0	0-143	49	85.6271	140.219	pass	pass	pass	pass	warn	fail	pass	fail	pass	warn	pass
FD01872923.rev.paired	FD01872923.rev.paired	Original	Conventional base calls	Sanger / Illumina 1.9	390137	0	0-143	49	87.1907	139.613	pass	pass	pass	pass	warn	fail	pass	fail	pass	pass	pass
FD01872924.for.paired	FD01872924.for.paired	Original	Conventional base calls	Sanger / Illumina 1.9	427230	0	0-143	50	83.8431	139.931	pass	pass	pass	pass	warn	fail	pass	fail	pass	warn	pass
FD01872924.rev.paired	FD01872924.rev.paired	Original	Conventional base calls	Sanger / Illumina 1.9	427230	0	0-143	50	85.3677	139.669	pass	pass	pass	pass	warn	warn	pass	fail	pass	pass	pass
FD01872925.for.paired	FD01872925.for.paired	Original	Conventional base calls	Sanger / Illumina 1.9	433346	0	0-143	49	84.2381	140.681	pass	pass	pass	pass	warn	fail	pass	fail	pass	pass	pass
FD01872925.rev.paired	FD01872925.rev.paired	Original	Conventional base calls	Sanger / Illumina 1.9	433346	0	0-143	49	85.9341	140.043	pass	pass	pass	pass	warn	warn	pass	fail	pass	pass	pass
FD01872926.for.paired	FD01872926.for.paired	Original	Conventional base calls	Sanger / Illumina 1.9	471363	0	0-143	49	79.3913	140.963	pass	pass	pass	pass	fail	fail	pass	fail	pass	pass	pass
FD01872926.rev.paired	FD01872926.rev.paired	Original	Conventional base calls	Sanger / Illumina 1.9	471363	0	0-143	49	82.5454	139.184	pass	pass	pass	pass	warn	warn	pass	fail	pass	pass	pass
FD01872927.for.paired	FD01872927.for.paired	Original	Conventional base calls	Sanger / Illumina 1.9	774913	0	0-143	50	74.9601	140.882	pass	pass	pass	pass	fail	warn	pass	fail	pass	pass	pass
FD01872927.rev.paired	FD01872927.rev.paired	Original	Conventional base calls	Sanger / Illumina 1.9	774913	0	0-143	50	78.1763	139.709	pass	pass	pass	pass	warn	warn	pass	fail	pass	pass	pass
FD01872928.for.paired	FD01872928.for.paired	Original	Conventional base calls	Sanger / Illumina 1.9	531936	0	0-143	50	79.55	141.11	pass	pass	pass	pass	fail	warn	pass	fail	pass	pass	pass
FD01872928.rev.paired	FD01872928.rev.paired	Original	Conventional base calls	Sanger / Illumina 1.9	531936	0	0-143	50	81.4481	140.419	pass	pass	pass	pass	warn	warn	pass	fail	pass	pass	pass
FD01872929.for.paired	FD01872929.for.paired	Original	Conventional base calls	Sanger / Illumina 1.9	428314	0	0-143	49	84.6799	140.46	pass	pass	pass	pass	fail	fail	pass	fail	pass	pass	pass
FD01872929.rev.paired	FD01872929.rev.paired	Original	Conventional base calls	Sanger / Illumina 1.9	428314	0	0-143	49	86.2811	139.965	pass	pass	pass	pass	fail	warn	pass	fail	pass	pass	pass
FD01872930.for.paired	FD01872930.for.paired	Original	Conventional base calls	Sanger / Illumina 1.9	395888	0	0-143	49	85.5561	140.464	pass	pass	pass	pass	fail	fail	pass	fail	pass	pass	pass
FD01872930.rev.paired	FD01872930.rev.paired	Original	Conventional base calls	Sanger / Illumina 1.9	395888	0	0-143	49	86.9436	139.971	pass	pass	pass	pass	warn	warn	pass	fail	pass	pass	pass
FD01872931.for.paired	FD01872931.for.paired	Original	Conventional base calls	Sanger / Illumina 1.9	395242	0	0-143	49	85.1605	140.892	pass	pass	pass	pass	warn	fail	pass	fail	pass	pass	pass
FD01872931.rev.paired	FD01872931.rev.paired	Original	Conventional base calls	Sanger / Illumina 1.9	395242	0	0-143	49	86.858	139.979	pass	pass	pass	pass	warn	fail	pass	fail	pass	pass	pass
FD01872932.for.paired	FD01872932.for.paired	Original	Conventional base calls	Sanger / Illumina 1.9	443712	0	0-143	50	81.3633	140.864	pass	pass	pass	pass	fail	fail	pass	fail	pass	pass	pass
FD01872932.rev.paired	FD01872932.rev.paired	Original	Conventional base calls	Sanger / Illumina 1.9	443712	0	0-143	50	82.8245	140.124	pass	pass	pass	pass	fail	warn	pass	fail	pass	pass	pass
FD01872933.for.paired	FD01872933.for.paired	Original	Conventional base calls	Sanger / Illumina 1.9	357118	0	0-143	49	86.3075	140.611	pass	pass	pass	pass	warn	fail	pass	fail	pass	pass	pass
FD01872933.rev.paired	FD01872933.rev.paired	Original	Conventional base calls	Sanger / Illumina 1.9	357118	0	0-143	49	87.7378	139.847	pass	pass	pass	pass	warn	fail	pass	fail	pass	pass	pass
FD01872934.for.paired	FD01872934.for.paired	Original	Conventional base calls	Sanger / Illumina 1.9	500261	0	0-143	50	80.7462	140.501	pass	pass	pass	pass	warn	fail	pass	fail	pass	pass	pass
FD01872934.rev.paired	FD01872934.rev.paired	Original	Conventional base calls	Sanger / Illumina 1.9	500261	0	0-143	50	82.4894	139.915	pass	pass	pass	pass	warn	warn	pass	fail	pass	pass	pass
FD01872935.for.paired	FD01872935.for.paired	Original	Conventional base calls	Sanger / Illumina 1.9	482116	0	0-143	50	80.4271	141.033	pass	pass	pass	pass	fail	warn	pass	fail	pass	pass	pass
FD01872935.rev.paired	FD01872935.rev.paired	Original	Conventional base calls	Sanger / Illumina 1.9	482116	0	0-143	50	82.7691	139.762	pass	pass	pass	pass	warn	warn	pass	fail	pass	pass	pass
FD01872936.for.paired	FD01872936.for.paired	Original	Conventional base calls	Sanger / Illumina 1.9	535260	0	0-143	50	79.8678	141.014	pass	pass	pass	pass	fail	fail	pass	fail	pass	pass	pass
FD01872936.rev.paired	FD01872936.rev.paired	Original	Conventional base calls	Sanger / Illumina 1.9	535260	0	0-143	50	81.669	140.4	pass	pass	pass	pass	warn	warn	pass	fail	pass	pass	pass
FD01872937.for.paired	FD01872937.for.paired	Original	Conventional base calls	Sanger / Illumina 1.9	492024	0	0-143	50	84.3526	139.621	pass	pass	pass	pass	warn	fail	pass	fail	pass	warn	pass
FD01872937.rev.paired	FD01872937.rev.paired	Original	Conventional base calls	Sanger / Illumina 1.9	492024	0	0-143	50	85.9695	139.415	pass	pass	pass	pass	warn	warn	pass	fail	pass	pass	pass
FD01872938.for.paired	FD01872938.for.paired	Original	Conventional base calls	Sanger / Illumina 1.9	450613	0	0-143	49	85.1847	140.462	pass	pass	pass	pass	warn	fail	pass	fail	pass	warn	pass
FD01872938.rev.paired	FD01872938.rev.paired	Original	Conventional base calls	Sanger / Illumina 1.9	450613	0	0-143	49	87.1272	139.696	pass	pass	pass	pass	warn	warn	pass	fail	pass	pass	pass
FD01872939.for.paired	FD01872939.for.paired	Original	Conventional base calls	Sanger / Illumina 1.9	529068	0	0-143	49	82.3645	140.581	pass	pass	pass	pass	fail	fail	pass	fail	pass	pass	pass
FD01872939.rev.paired	FD01872939.rev.paired	Original	Conventional base calls	Sanger / Illumina 1.9	529068	0	0-143	49	83.8442	140.14	pass	pass	pass	pass	warn	fail	pass	fail	pass	pass	pass
FD01872940.for.paired	FD01872940.for.paired	Original	Conventional base calls	Sanger / Illumina 1.9	606798	0	0-143	50	77.359	141.291	pass	pass	pass	pass	fail	warn	pass	fail	pass	pass	pass
FD01872940.rev.paired	FD01872940.rev.paired	Original	Conventional base calls	Sanger / Illumina 1.9	606798	0	0-143	50	80.3501	139.355	pass	pass	pass	pass	warn	warn	pass	fail	pass	pass	pass
FD01872941.for.paired	FD01872941.for.paired	Original	Conventional base calls	Sanger / Illumina 1.9	548898	0	0-143	49	79.0355	141.163	pass	pass	pass	pass	fail	fail	pass	fail	pass	pass	pass
FD01872941.rev.paired	FD01872941.rev.paired	Original	Conventional base calls	Sanger / Illumina 1.9	548898	0	0-143	49	81.548	139.932	pass	pass	pass	pass	warn	warn	pass	fail	pass	pass	pass
FD01872942.for.paired	FD01872942.for.paired	Original	Conventional base calls	Sanger / Illumina 1.9	334976	0	0-143	50	82.2991	140.852	pass	pass	pass	pass	fail	warn	pass	fail	pass	pass	pass
FD01872942.rev.paired	FD01872942.rev.paired	Original	Conventional base calls	Sanger / Illumina 1.9	334976	0	0-143	50	84.1009	139.918	pass	pass	pass	pass	warn	warn	pass	fail	pass	pass	pass
FD01874579.for.paired	FD01874579.for.paired	Original	Conventional base calls	Sanger / Illumina 1.9	569498	0	0-143	50	76.9701	139.737	pass	pass	warn	pass	fail	warn	pass	fail	pass	pass	pass
FD01874579.rev.paired	FD01874579.rev.paired	Original	Conventional base calls	Sanger / Illumina 1.9	569498	0	0-143	50	78.2111	139.898	pass	pass	pass	pass	fail	warn	pass	fail	pass	pass	pass
FD01874580.for.paired	FD01874580.for.paired	Original	Conventional base calls	Sanger / Illumina 1.9	651230	0	0-143	50	75.9851	140.94	pass	pass	pass	pass	fail	warn	pass	fail	pass	pass	pass
FD01874580.rev.paired	FD01874580.rev.paired	Original	Conventional base calls	Sanger / Illumina 1.9	651230	0	0-143	50	77.192	139.996	pass	pass	warn	pass	fail	warn	pass	fail	pass	pass	pass
FD01874581.for.paired	FD01874581.for.paired	Original	Conventional base calls	Sanger / Illumina 1.9	595303	0	0-143	49	74.4465	141.262	pass	pass	pass	pass	fail	fail	pass	fail	pass	pass	pass
FD01874581.rev.paired	FD01874581.rev.paired	Original	Conventional base calls	Sanger / Illumina 1.9	595303	0	0-143	49	75.5579	140.317	pass	pass	warn	pass	warn	fail	pass	fail	pass	pass	pass
FD01874582.for.paired	FD01874582.for.paired	Original	Conventional base calls	Sanger / Illumina 1.9	622674	0	0-143	50	77.8965	140.871	pass	pass	pass	pass	warn	warn	pass	fail	pass	pass	pass
FD01874582.rev.paired	FD01874582.rev.paired	Original	Conventional base calls	Sanger / Illumina 1.9	622674	0	0-143	50	78.8165	140.048	pass	pass	warn	pass	warn	warn	pass	fail	pass	pass	pass
FD01874583.for.paired	FD01874583.for.paired	Original	Conventional base calls	Sanger / Illumina 1.9	629845	0	0-143	50	75.3149	141.127	pass	pass	pass	pass	fail	warn	pass	fail	pass	pass	pass
FD01874583.rev.paired	FD01874583.rev.paired	Original	Conventional base calls	Sanger / Illumina 1.9	629845	0	0-143	50	76.6067	140.227	pass	pass	warn	pass	fail	warn	pass	fail	pass	pass	pass
FD01874585.for.paired	FD01874585.for.paired	Original	Conventional base calls	Sanger / Illumina 1.9	413752	0	0-143	50	82.1583	140.794	pass	pass	pass	pass	warn	fail	pass	fail	pass	pass	pass
FD01874585.rev.paired	FD01874585.rev.paired	Original	Conventional base calls	Sanger / Illumina 1.9	413752	0	0-143	50	83.1532	140.014	pass	pass	warn	pass	warn	warn	pass	fail	pass	pass	pass
FD01874587.for.paired	FD01874587.for.paired	Original	Conventional base calls	Sanger / Illumina 1.9	479649	0	0-143	50	81.0105	139.644	pass	pass	warn	pass	fail	warn	pass	fail	pass	pass	pass
FD01874587.rev.paired	FD01874587.rev.paired	Original	Conventional base calls	Sanger / Illumina 1.9	479649	0	0-143	50	81.9773	139.793	pass	pass	warn	pass	fail	warn	pass	fail	pass	pass	pass
FD01874588.for.paired	FD01874588.for.paired	Original	Conventional base calls	Sanger / Illumina 1.9	597473	0	0-143	50	77.9716	140.99	pass	pass	pass	pass	warn	fail	pass	fail	pass	pass	pass
FD01874588.rev.paired	FD01874588.rev.paired	Original	Conventional base calls	Sanger / Illumina 1.9	597473	0	0-143	50	79.2397	139.919	pass	pass	warn	pass	warn	warn	pass	fail	pass	pass	pass
FD01874589.for.paired	FD01874589.for.paired	Original	Conventional base calls	Sanger / Illumina 1.9	552404	0	0-143	50	83.1532	139.631	pass	pass	pass	pass	warn	fail	pass	fail	pass	pass	pass
FD01874589.rev.paired	FD01874589.rev.paired	Original	Conventional base calls	Sanger / Illumina 1.9	552404	0	0-143	50	83.981	139.81	pass	pass	warn	pass	warn	warn	pass	fail	pass	pass	pass
FD01874590.for.paired	FD01874590.for.paired	Original	Conventional base calls	Sanger / Illumina 1.9	525760	0	0-143	50	77.5821	140.999	pass	pass	pass	pass	fail	warn	pass	fail	pass	pass	pass
FD01874590.rev.paired	FD01874590.rev.paired	Original	Conventional base calls	Sanger / Illumina 1.9	525760	0	0-143	50	78.5103	140.326	pass	pass	warn	pass	fail	warn	pass	fail	pass	pass	pass
FD01874591.for.paired	FD01874591.for.paired	Original	Conventional base calls	Sanger / Illumina 1.9	630612	0	0-143	50	75.8375	141.193	pass	pass	pass	pass	fail	warn	pass	fail	pass	pass	pass
FD01874591.rev.paired	FD01874591.rev.paired	Original	Conventional base calls	Sanger / Illumina 1.9	630612	0	0-143	49	77.1664	140.113	pass	pass	warn	pass	fail	warn	pass	fail	pass	pass	pass
FD01874592.for.paired	FD01874592.for.paired	Original	Conventional base calls	Sanger / Illumina 1.9	543698	0	0-143	50	79.187	140.594	pass	pass	pass	pass	fail	warn	pass	fail	pass	pass	pass
FD01874592.rev.paired	FD01874592.rev.paired	Original	Conventional base calls	Sanger / Illumina 1.9	543698	0	0-143	50	79.858	140.054	pass	pass	warn	pass	warn	warn	pass	fail	pass	pass	pass
FD01874593.for.paired	FD01874593.for.paired	Original	Conventional base calls	Sanger / Illumina 1.9	452966	0	0-143	50	79.4473	140.629	pass	pass	pass	pass	fail	fail	pass	fail	pass	pass	pass
FD01874593.rev.paired	FD01874593.rev.paired	Original	Conventional base calls	Sanger / Illumina 1.9	452966	0	0-143	50	80.7387	139.71	pass	pass	warn	pass	fail	warn	pass	fail	pass	pass	pass
FD01874594.for.paired	FD01874594.for.paired	Original	Conventional base calls	Sanger / Illumina 1.9	513177	0	0-143	50	76.8479	141.154	pass	pass	pass	pass	fail	warn	pass	fail	pass	pass	pass
FD01874594.rev.paired	FD01874594.rev.paired	Original	Conventional base calls	Sanger / Illumina 1.9	513177	0	0-143	50	78.0503	140.197	pass	pass	warn	pass	fail	warn	pass	fail	pass	pass	pass
FD01874595.for.paired	FD01874595.for.paired	Original	Conventional base calls	Sanger / Illumina 1.9	642502	0	0-143	50	76.7132	140.932	pass	pass	pass	pass	fail	warn	pass	fail	pass	pass	pass
FD01874595.rev.paired	FD01874595.rev.paired	Original	Conventional base calls	Sanger / Illumina 1.9	642502	0	0-143	50	77.8245	140.005	pass	pass	warn	pass	warn	warn	pass	fail	pass	pass	pass
FD01874596.for.paired	FD01874596.for.paired	Original	Conventional base calls	Sanger / Illumina 1.9	711969	0	0-143	49	73.7925	141.29	pass	pass	pass	pass	fail	warn	pass	fail	pass	pass	pass
FD01874596.rev.paired	FD01874596.rev.paired	Original	Conventional base calls	Sanger / Illumina 1.9	711969	0	0-143	49	75.5185	140.149	pass	pass	warn	pass	fail	warn	pass	fail	pass	pass	pass
FD01874597.for.paired	FD01874597.for.paired	Original	Conventional base calls	Sanger / Illumina 1.9	478082	0	0-143	50	86.5589	139.677	pass	pass	pass	pass	warn	fail	pass	fail	pass	warn	pass
FD01874597.rev.paired	FD01874597.rev.paired	Original	Conventional base calls	Sanger / Illumina 1.9	478082	0	0-143	50	87.6465	139.167	pass	pass	warn	pass	warn	warn	pass	fail	pass	pass	pass
FD01874598.for.paired	FD01874598.for.paired	Original	Conventional base calls	Sanger / Illumina 1.9	745949	0	0-143	50	72.0582	141.13	pass	pass	pass	pass	fail	warn	pass	fail	pass	pass	pass
FD01874598.rev.paired	FD01874598.rev.paired	Original	Conventional base calls	Sanger / Illumina 1.9	745949	0	0-143	50	73.2822	140.13	pass	pass	warn	pass	fail	warn	pass	fail	pass	pass	pass
FD01874599.for.paired	FD01874599.for.paired	Original	Conventional base calls	Sanger / Illumina 1.9	478376	0	0-143	50	78.7477	141.055	pass	pass	pass	pass	fail	warn	pass	fail	pass	pass	pass
FD01874599.rev.paired	FD01874599.rev.paired	Original	Conventional base calls	Sanger / Illumina 1.9	478376	0	0-143	50	80.2162	140.096	pass	pass	warn	pass	fail	warn	pass	fail	pass	pass	pass
FD01874600.for.paired	FD01874600.for.paired	Original	Conventional base calls	Sanger / Illumina 1.9	579916	0	0-143	50	78.1801	140.904	pass	pass	pass	pass	fail	warn	pass	fail	pass	pass	pass
FD01874600.rev.paired	FD01874600.rev.paired	Original	Conventional base calls	Sanger / Illumina 1.9	579916	0	0-143	50	79.2081	140.091	pass	pass	warn	pass	warn	warn	pass	fail	pass	pass	pass
FD01874601.for.paired	FD01874601.for.paired	Original	Conventional base calls	Sanger / Illumina 1.9	560244	0	0-143	50	77.5038	140.84	pass	pass	pass	pass	fail	warn	pass	fail	pass	pass	pass
FD01874601.rev.paired	FD01874601.rev.paired	Original	Conventional base calls	Sanger / Illumina 1.9	560244	0	0-143	50	78.494	140.069	pass	pass	warn	pass	fail	warn	pass	fail	pass	pass	pass
FD01874603.for.paired	FD01874603.for.paired	Original	Conventional base calls	Sanger / Illumina 1.9	545395	0	0-143	50	79.1643	139.873	pass	pass	warn	pass	fail	warn	pass	fail	pass	pass	pass
FD01874603.rev.paired	FD01874603.rev.paired	Original	Conventional base calls	Sanger / Illumina 1.9	545395	0	0-143	50	80.1827	139.793	pass	pass	warn	pass	fail	warn	pass	fail	pass	pass	pass
FD01874604.for.paired	FD01874604.for.paired	Original	Conventional base calls	Sanger / Illumina 1.9	589858	0	0-143	50	77.418	141.066	pass	pass	pass	pass	warn	warn	pass	fail	pass	pass	pass
FD01874604.rev.paired	FD01874604.rev.paired	Original	Conventional base calls	Sanger / Illumina 1.9	589858	0	0-143	49	78.2263	140.32	pass	pass	warn	pass	warn	warn	pass	fail	pass	pass	pass
FD01874605.for.paired	FD01874605.for.paired	Original	Conventional base calls	Sanger / Illumina 1.9	547942	0	0-143	50	83.0162	140.73	pass	pass	pass	pass	warn	warn	pass	fail	pass	pass	pass
FD01874605.rev.paired	FD01874605.rev.paired	Original	Conventional base calls	Sanger / Illumina 1.9	547942	0	0-143	50	83.8056	140.319	pass	pass	warn	pass	warn	warn	pass	fail	pass	pass	pass
FD01874606.for.paired	FD01874606.for.paired	Original	Conventional base calls	Sanger / Illumina 1.9	591819	0	0-143	50	76.2571	140.848	pass	pass	pass	pass	fail	warn	pass	fail	pass	pass	pass
FD01874606.rev.paired	FD01874606.rev.paired	Original	Conventional base calls	Sanger / Illumina 1.9	591819	0	0-143	50	77.1428	140.289	pass	pass	warn	pass	fail	warn	pass	fail	pass	pass	pass
FD01874607.for.paired	FD01874607.for.paired	Original	Conventional base calls	Sanger / Illumina 1.9	546112	0	0-143	50	77.4088	140.921	pass	pass	pass	pass	fail	warn	pass	fail	pass	pass	pass
FD01874607.rev.paired	FD01874607.rev.paired	Original	Conventional base calls	Sanger / Illumina 1.9	546112	0	0-143	50	78.1715	140.376	pass	pass	warn	pass	fail	warn	pass	fail	pass	pass	pass
FD01874608.for.paired	FD01874608.for.paired	Original	Conventional base calls	Sanger / Illumina 1.9	427060	0	0-143	50	81.1689	140.592	pass	pass	pass	pass	fail	warn	pass	fail	pass	pass	pass
FD01874608.rev.paired	FD01874608.rev.paired	Original	Conventional base calls	Sanger / Illumina 1.9	427060	0	0-143	50	82.0717	139.971	pass	pass	warn	pass	fail	warn	pass	fail	pass	pass	pass
FD01874609.for.paired	FD01874609.for.paired	Original	Conventional base calls	Sanger / Illumina 1.9	590040	0	0-143	50	76.513	141.01	pass	pass	pass	pass	fail	warn	pass	fail	pass	pass	pass
FD01874609.rev.paired	FD01874609.rev.paired	Original	Conventional base calls	Sanger / Illumina 1.9	590040	0	0-143	50	77.514	140.187	pass	pass	warn	pass	fail	warn	pass	fail	pass	pass	pass
FD01874610.for.paired	FD01874610.for.paired	Original	Conventional base calls	Sanger / Illumina 1.9	413793	0	0-143	50	83.0302	139.67	pass	pass	pass	pass	fail	warn	pass	fail	pass	pass	pass
FD01874610.rev.paired	FD01874610.rev.paired	Original	Conventional base calls	Sanger / Illumina 1.9	413793	0	0-143	50	82.6567	140.396	pass	pass	warn	pass	fail	warn	pass	fail	pass	pass	pass
FD01874611.for.paired	FD01874611.for.paired	Original	Conventional base calls	Sanger / Illumina 1.9	592869	0	0-143	49	75.7029	141.166	pass	pass	pass	pass	fail	warn	pass	fail	pass	pass	pass
FD01874611.rev.paired	FD01874611.rev.paired	Original	Conventional base calls	Sanger / Illumina 1.9	592869	0	0-143	49	76.9811	140.169	pass	pass	warn	pass	fail	warn	pass	fail	pass	pass	pass
FD01874612.for.paired	FD01874612.for.paired	Original	Conventional base calls	Sanger / Illumina 1.9	880885	0	0-143	50	73.0768	140.826	pass	pass	pass	pass	fail	warn	pass	fail	pass	pass	pass
FD01874612.rev.paired	FD01874612.rev.paired	Original	Conventional base calls	Sanger / Illumina 1.9	880885	0	0-143	50	73.9963	140.125	pass	pass	warn	pass	fail	warn	pass	fail	pass	pass	pass
FD01874613.for.paired	FD01874613.for.paired	Original	Conventional base calls	Sanger / Illumina 1.9	362947	0	0-143	56	81.1351	136.506	pass	pass	pass	pass	fail	fail	pass	fail	pass	warn	pass
FD01874613.rev.paired	FD01874613.rev.paired	Original	Conventional base calls	Sanger / Illumina 1.9	362947	0	0-143	55	82.8522	136.637	pass	pass	warn	pass	fail	warn	pass	fail	pass	pass	pass
FD01874614.for.paired	FD01874614.for.paired	Original	Conventional base calls	Sanger / Illumina 1.9	571378	0	0-143	50	76.8074	141.015	pass	pass	pass	pass	fail	warn	pass	fail	pass	pass	pass
FD01874614.rev.paired	FD01874614.rev.paired	Original	Conventional base calls	Sanger / Illumina 1.9	571378	0	0-143	50	77.912	140.309	pass	pass	warn	pass	fail	warn	pass	fail	pass	pass	pass
FD01874616.for.paired	FD01874616.for.paired	Original	Conventional base calls	Sanger / Illumina 1.9	398390	0	0-143	50	82.4805	139.582	pass	pass	pass	pass	warn	warn	pass	fail	pass	pass	pass
FD01874616.rev.paired	FD01874616.rev.paired	Original	Conventional base calls	Sanger / Illumina 1.9	398390	0	0-143	50	82.7702	140.386	pass	pass	warn	pass	warn	warn	pass	fail	pass	pass	pass
FD01874617.for.paired	FD01874617.for.paired	Original	Conventional base calls	Sanger / Illumina 1.9	575378	0	0-143	50	76.4613	139.76	pass	pass	pass	pass	fail	warn	pass	fail	pass	pass	pass
FD01874617.rev.paired	FD01874617.rev.paired	Original	Conventional base calls	Sanger / Illumina 1.9	575378	0	0-143	50	77.6879	140.017	pass	pass	warn	pass	fail	warn	pass	fail	pass	pass	pass
FD01874618.for.paired	FD01874618.for.paired	Original	Conventional base calls	Sanger / Illumina 1.9	406045	0	0-143	50	83.5727	139.366	pass	pass	pass	pass	warn	fail	pass	fail	pass	pass	pass
FD01874618.rev.paired	FD01874618.rev.paired	Original	Conventional base calls	Sanger / Illumina 1.9	406045	0	0-143	50	83.2501	140.577	pass	pass	warn	pass	warn	warn	pass	fail	pass	pass	pass
FD01874619.for.paired	FD01874619.for.paired	Original	Conventional base calls	Sanger / Illumina 1.9	532005	0	0-143	51	80.398	138.992	pass	pass	pass	pass	warn	fail	pass	fail	pass	warn	pass
FD01874619.rev.paired	FD01874619.rev.paired	Original	Conventional base calls	Sanger / Illumina 1.9	532005	0	0-143	51	80.9244	139.407	pass	pass	warn	pass	warn	warn	pass	fail	pass	pass	pass
FD01874620.for.paired	FD01874620.for.paired	Original	Conventional base calls	Sanger / Illumina 1.9	520385	0	0-143	50	80.4551	140.079	pass	pass	pass	pass	fail	fail	pass	fail	pass	warn	pass
FD01874620.rev.paired	FD01874620.rev.paired	Original	Conventional base calls	Sanger / Illumina 1.9	520385	0	0-143	50	81.031	139.675	pass	pass	warn	pass	fail	warn	pass	fail	pass	pass	pass
FD01874621.for.paired	FD01874621.for.paired	Original	Conventional base calls	Sanger / Illumina 1.9	703350	0	0-143	49	82.8002	137.026	pass	pass	warn	pass	warn	fail	pass	fail	pass	warn	pass
FD01874621.rev.paired	FD01874621.rev.paired	Original	Conventional base calls	Sanger / Illumina 1.9	703350	0	0-143	50	82.8325	139.231	pass	pass	warn	pass	warn	warn	pass	fail	pass	pass	pass
FD01874623.for.paired	FD01874623.for.paired	Original	Conventional base calls	Sanger / Illumina 1.9	722623	0	0-143	51	76.9582	140	pass	pass	pass	pass	fail	fail	pass	fail	pass	warn	pass
FD01874623.rev.paired	FD01874623.rev.paired	Original	Conventional base calls	Sanger / Illumina 1.9	722623	0	0-143	51	77.8839	139.428	pass	pass	warn	pass	fail	warn	pass	fail	pass	pass	pass
FD01874624.for.paired	FD01874624.for.paired	Original	Conventional base calls	Sanger / Illumina 1.9	715120	0	0-143	50	74.7493	140.571	pass	pass	pass	pass	fail	warn	pass	fail	pass	pass	pass
FD01874624.rev.paired	FD01874624.rev.paired	Original	Conventional base calls	Sanger / Illumina 1.9	715120	0	0-143	50	75.6735	139.815	pass	pass	warn	pass	fail	warn	pass	fail	pass	pass	pass
FD01874625.for.paired	FD01874625.for.paired	Original	Conventional base calls	Sanger / Illumina 1.9	741021	0	0-143	50	74.3878	140.648	pass	pass	pass	pass	fail	warn	pass	fail	pass	pass	pass
FD01874625.rev.paired	FD01874625.rev.paired	Original	Conventional base calls	Sanger / Illumina 1.9	741021	0	0-143	50	75.2782	139.963	pass	pass	warn	pass	fail	warn	pass	fail	pass	pass	pass
FD01874626.for.paired	FD01874626.for.paired	Original	Conventional base calls	Sanger / Illumina 1.9	442699	0	0-143	50	82.0997	140.211	pass	pass	pass	pass	fail	fail	pass	fail	pass	pass	pass
FD01874626.rev.paired	FD01874626.rev.paired	Original	Conventional base calls	Sanger / Illumina 1.9	442699	0	0-143	50	82.6508	139.708	pass	pass	warn	pass	fail	warn	pass	fail	pass	pass	pass
FD01874627.for.paired	FD01874627.for.paired	Original	Conventional base calls	Sanger / Illumina 1.9	530502	0	0-143	50	79.5322	140.76	pass	pass	pass	pass	fail	warn	pass	fail	pass	pass	pass
FD01874627.rev.paired	FD01874627.rev.paired	Original	Conventional base calls	Sanger / Illumina 1.9	530502	0	0-143	50	80.4439	140.177	pass	pass	warn	pass	fail	warn	pass	fail	pass	pass	pass
FD01874628.for.paired	FD01874628.for.paired	Original	Conventional base calls	Sanger / Illumina 1.9	509224	0	0-143	50	80.0783	140.897	pass	pass	pass	pass	fail	fail	pass	fail	pass	pass	pass
FD01874628.rev.paired	FD01874628.rev.paired	Original	Conventional base calls	Sanger / Illumina 1.9	509224	0	0-143	50	81.0172	139.959	pass	pass	warn	pass	fail	warn	pass	fail	pass	pass	pass
FD01874629.for.paired	FD01874629.for.paired	Original	Conventional base calls	Sanger / Illumina 1.9	496759	0	0-143	50	80.3318	140.741	pass	pass	pass	pass	warn	warn	pass	fail	pass	pass	pass
FD01874629.rev.paired	FD01874629.rev.paired	Original	Conventional base calls	Sanger / Illumina 1.9	496759	0	0-143	50	81.1981	140.258	pass	pass	warn	pass	warn	warn	pass	fail	pass	pass	pass
FD01874630.for.paired	FD01874630.for.paired	Original	Conventional base calls	Sanger / Illumina 1.9	529823	0	0-143	50	79.0324	140.915	pass	pass	pass	pass	warn	warn	pass	fail	pass	pass	pass
FD01874630.rev.paired	FD01874630.rev.paired	Original	Conventional base calls	Sanger / Illumina 1.9	529823	0	0-143	50	79.8154	140.07	pass	pass	warn	pass	warn	warn	pass	fail	pass	pass	pass
FD01874631.for.paired	FD01874631.for.paired	Original	Conventional base calls	Sanger / Illumina 1.9	602914	0	0-143	50	75.7474	140.647	pass	pass	pass	pass	fail	warn	pass	fail	pass	pass	pass
FD01874631.rev.paired	FD01874631.rev.paired	Original	Conventional base calls	Sanger / Illumina 1.9	602914	0	0-143	50	75.8346	140.553	pass	pass	warn	pass	fail	warn	pass	fail	pass	pass	pass
FD01874632.for.paired	FD01874632.for.paired	Original	Conventional base calls	Sanger / Illumina 1.9	686788	0	0-143	50	74.0286	141.107	pass	pass	pass	pass	fail	warn	pass	fail	pass	pass	pass
FD01874632.rev.paired	FD01874632.rev.paired	Original	Conventional base calls	Sanger / Illumina 1.9	686788	0	0-143	50	75.1609	140.239	pass	pass	warn	pass	fail	warn	pass	fail	pass	pass	pass
FD01874633.for.paired	FD01874633.for.paired	Original	Conventional base calls	Sanger / Illumina 1.9	488273	0	0-143	50	79.9656	140.542	pass	pass	pass	pass	fail	warn	pass	fail	pass	pass	pass
FD01874633.rev.paired	FD01874633.rev.paired	Original	Conventional base calls	Sanger / Illumina 1.9	488273	0	0-143	50	80.4216	139.985	pass	pass	warn	pass	fail	warn	pass	fail	pass	pass	pass
FD01874634.for.paired	FD01874634.for.paired	Original	Conventional base calls	Sanger / Illumina 1.9	444070	0	0-143	50	80.1177	140.342	pass	pass	pass	pass	fail	warn	pass	fail	pass	pass	pass
FD01874634.rev.paired	FD01874634.rev.paired	Original	Conventional base calls	Sanger / Illumina 1.9	444070	0	0-143	50	81.2803	139.868	pass	pass	warn	pass	fail	warn	pass	fail	pass	pass	pass
FD01874635.for.paired	FD01874635.for.paired	Original	Conventional base calls	Sanger / Illumina 1.9	464797	0	0-143	51	81.175	140.477	pass	pass	pass	pass	fail	fail	pass	fail	pass	pass	pass
FD01874635.rev.paired	FD01874635.rev.paired	Original	Conventional base calls	Sanger / Illumina 1.9	464797	0	0-143	51	81.482	140.186	pass	pass	warn	pass	fail	warn	pass	fail	pass	pass	pass
FD01874636.for.paired	FD01874636.for.paired	Original	Conventional base calls	Sanger / Illumina 1.9	500652	0	0-143	50	80.2514	140.784	pass	pass	pass	pass	fail	warn	pass	fail	pass	pass	pass
FD01874636.rev.paired	FD01874636.rev.paired	Original	Conventional base calls	Sanger / Illumina 1.9	500652	0	0-143	50	81.2897	139.761	pass	pass	warn	pass	warn	warn	pass	fail	pass	pass	pass
FD01874637.for.paired	FD01874637.for.paired	Original	Conventional base calls	Sanger / Illumina 1.9	438858	0	0-143	49	84.9362	140.559	pass	pass	pass	pass	warn	fail	pass	fail	pass	pass	pass
FD01874637.rev.paired	FD01874637.rev.paired	Original	Conventional base calls	Sanger / Illumina 1.9	438858	0	0-143	49	85.365	140.202	pass	pass	warn	pass	warn	warn	pass	fail	pass	pass	pass
FD01874638.for.paired	FD01874638.for.paired	Original	Conventional base calls	Sanger / Illumina 1.9	409256	0	0-143	50	83.0183	140.283	pass	pass	pass	pass	warn	warn	pass	fail	pass	pass	pass
FD01874638.rev.paired	FD01874638.rev.paired	Original	Conventional base calls	Sanger / Illumina 1.9	409256	0	0-143	50	83.0282	140.397	pass	pass	warn	pass	fail	warn	pass	fail	pass	pass	pass
FD01874640.for.paired	FD01874640.for.paired	Original	Conventional base calls	Sanger / Illumina 1.9	522753	0	0-143	50	78.5519	140.203	pass	pass	pass	pass	fail	warn	pass	fail	pass	pass	pass
FD01874640.rev.paired	FD01874640.rev.paired	Original	Conventional base calls	Sanger / Illumina 1.9	522753	0	0-143	50	79.0656	140.022	pass	pass	warn	pass	fail	warn	pass	fail	pass	pass	pass
FD01874641.for.paired	FD01874641.for.paired	Original	Conventional base calls	Sanger / Illumina 1.9	427214	0	0-143	49	80.298	140.246	pass	pass	pass	pass	warn	warn	pass	fail	pass	pass	pass
FD01874641.rev.paired	FD01874641.rev.paired	Original	Conventional base calls	Sanger / Illumina 1.9	427214	0	0-143	49	80.0768	140.784	pass	pass	warn	pass	fail	warn	pass	fail	pass	pass	pass
FD01874642.for.paired	FD01874642.for.paired	Original	Conventional base calls	Sanger / Illumina 1.9	576013	0	0-143	50	74.7334	140.523	pass	pass	pass	pass	fail	warn	pass	fail	pass	pass	pass
FD01874642.rev.paired	FD01874642.rev.paired	Original	Conventional base calls	Sanger / Illumina 1.9	576013	0	0-143	50	74.8261	140.538	pass	pass	warn	pass	fail	warn	pass	fail	pass	pass	pass
FD01874643.for.paired	FD01874643.for.paired	Original	Conventional base calls	Sanger / Illumina 1.9	314365	0	0-143	50	83.1408	140.807	pass	pass	pass	pass	fail	warn	pass	fail	pass	pass	pass
FD01874643.rev.paired	FD01874643.rev.paired	Original	Conventional base calls	Sanger / Illumina 1.9	314365	0	0-143	50	83.7091	140.502	pass	pass	warn	pass	fail	warn	pass	fail	pass	pass	pass
FD01874644.for.paired	FD01874644.for.paired	Original	Conventional base calls	Sanger / Illumina 1.9	612934	0	0-143	50	78.2647	140.779	pass	pass	pass	pass	fail	warn	pass	fail	pass	pass	pass
FD01874644.rev.paired	FD01874644.rev.paired	Original	Conventional base calls	Sanger / Illumina 1.9	612934	0	0-143	50	78.9477	140.468	pass	pass	warn	pass	fail	warn	pass	fail	pass	pass	pass
FD01874645.for.paired	FD01874645.for.paired	Original	Conventional base calls	Sanger / Illumina 1.9	577968	0	0-143	49	80.5752	141.048	pass	pass	pass	pass	warn	fail	pass	fail	pass	pass	pass
FD01874645.rev.paired	FD01874645.rev.paired	Original	Conventional base calls	Sanger / Illumina 1.9	577968	0	0-143	49	81.5889	140.003	pass	pass	warn	pass	warn	fail	pass	fail	pass	pass	pass
FD01874646.for.paired	FD01874646.for.paired	Original	Conventional base calls	Sanger / Illumina 1.9	629305	0	0-143	50	75.5229	140.875	pass	pass	pass	pass	fail	warn	pass	fail	pass	pass	pass
FD01874646.rev.paired	FD01874646.rev.paired	Original	Conventional base calls	Sanger / Illumina 1.9	629305	0	0-143	50	76.0949	140.492	pass	pass	warn	pass	fail	warn	pass	fail	pass	pass	pass
FD01874647.for.paired	FD01874647.for.paired	Original	Conventional base calls	Sanger / Illumina 1.9	543004	0	0-143	50	77.2327	141.136	pass	pass	pass	pass	fail	warn	pass	fail	pass	pass	pass
FD01874647.rev.paired	FD01874647.rev.paired	Original	Conventional base calls	Sanger / Illumina 1.9	543004	0	0-143	50	78.5329	139.987	pass	pass	warn	pass	fail	warn	pass	fail	pass	pass	pass
FD01874649.for.paired	FD01874649.for.paired	Original	Conventional base calls	Sanger / Illumina 1.9	608666	0	0-143	50	76.2167	140.821	pass	pass	pass	pass	fail	warn	pass	fail	pass	pass	pass
FD01874649.rev.paired	FD01874649.rev.paired	Original	Conventional base calls	Sanger / Illumina 1.9	608666	0	0-143	50	77.0238	140.037	pass	pass	warn	pass	fail	warn	pass	fail	pass	pass	pass
FD01874650.for.paired	FD01874650.for.paired	Original	Conventional base calls	Sanger / Illumina 1.9	484823	0	0-143	50	79.5132	141.188	pass	pass	pass	pass	fail	warn	pass	fail	pass	pass	pass
FD01874650.rev.paired	FD01874650.rev.paired	Original	Conventional base calls	Sanger / Illumina 1.9	484823	0	0-143	50	80.8488	140.19	pass	pass	warn	pass	warn	warn	pass	fail	pass	pass	pass
FD01874651.for.paired	FD01874651.for.paired	Original	Conventional base calls	Sanger / Illumina 1.9	484481	0	0-143	50	77.5812	141.217	pass	pass	pass	pass	fail	warn	pass	fail	pass	pass	pass
FD01874651.rev.paired	FD01874651.rev.paired	Original	Conventional base calls	Sanger / Illumina 1.9	484481	0	0-143	50	78.8292	140.373	pass	pass	warn	pass	fail	warn	pass	fail	pass	pass	pass
FD01874652.for.paired	FD01874652.for.paired	Original	Conventional base calls	Sanger / Illumina 1.9	569606	0	0-143	49	76.9516	140.919	pass	pass	pass	pass	fail	warn	pass	fail	pass	pass	pass
FD01874652.rev.paired	FD01874652.rev.paired	Original	Conventional base calls	Sanger / Illumina 1.9	569606	0	0-143	49	77.5411	140.54	pass	pass	warn	pass	fail	warn	pass	fail	pass	pass	pass
FD01874653.for.paired	FD01874653.for.paired	Original	Conventional base calls	Sanger / Illumina 1.9	644945	0	0-143	50	75.886	141.092	pass	pass	pass	pass	fail	warn	pass	fail	pass	pass	pass
FD01874653.rev.paired	FD01874653.rev.paired	Original	Conventional base calls	Sanger / Illumina 1.9	644945	0	0-143	50	77.0737	140.227	pass	pass	warn	pass	fail	warn	pass	fail	pass	pass	pass
FD01874654.for.paired	FD01874654.for.paired	Original	Conventional base calls	Sanger / Illumina 1.9	603517	0	0-143	50	75.3632	141.178	pass	pass	pass	pass	fail	warn	pass	fail	pass	pass	pass
FD01874654.rev.paired	FD01874654.rev.paired	Original	Conventional base calls	Sanger / Illumina 1.9	603517	0	0-143	49	76.4104	140.289	pass	pass	warn	pass	fail	warn	pass	fail	pass	pass	pass
FD01874655.for.paired	FD01874655.for.paired	Original	Conventional base calls	Sanger / Illumina 1.9	503913	0	0-143	50	78.2796	141.141	pass	pass	pass	pass	fail	warn	pass	fail	pass	pass	pass
FD01874655.rev.paired	FD01874655.rev.paired	Original	Conventional base calls	Sanger / Illumina 1.9	503913	0	0-143	50	79.5932	140.018	pass	pass	warn	pass	fail	warn	pass	fail	pass	pass	pass
FD01874656.for.paired	FD01874656.for.paired	Original	Conventional base calls	Sanger / Illumina 1.9	523708	0	0-143	50	78.51	140.584	pass	pass	pass	pass	fail	warn	pass	fail	pass	pass	pass
FD01874656.rev.paired	FD01874656.rev.paired	Original	Conventional base calls	Sanger / Illumina 1.9	523708	0	0-143	50	79.1921	139.925	pass	pass	warn	pass	fail	warn	pass	fail	pass	pass	pass
FD01874657.for.paired	FD01874657.for.paired	Original	Conventional base calls	Sanger / Illumina 1.9	637717	0	0-143	50	75.7994	140.676	pass	pass	pass	pass	fail	warn	pass	fail	pass	pass	pass
FD01874657.rev.paired	FD01874657.rev.paired	Original	Conventional base calls	Sanger / Illumina 1.9	637717	0	0-143	50	76.8059	139.911	pass	pass	warn	pass	fail	warn	pass	fail	pass	pass	pass
FD01874658.for.paired	FD01874658.for.paired	Original	Conventional base calls	Sanger / Illumina 1.9	535813	0	0-143	50	76.0151	141.307	pass	pass	pass	pass	fail	warn	pass	fail	pass	pass	pass
FD01874658.rev.paired	FD01874658.rev.paired	Original	Conventional base calls	Sanger / Illumina 1.9	535813	0	0-143	49	77.5086	140.293	pass	pass	warn	pass	fail	warn	pass	fail	pass	pass	pass
FD01874659.for.paired	FD01874659.for.paired	Original	Conventional base calls	Sanger / Illumina 1.9	561854	0	0-143	49	75.5466	140.079	pass	pass	warn	pass	fail	warn	pass	fail	pass	pass	pass
FD01874659.rev.paired	FD01874659.rev.paired	Original	Conventional base calls	Sanger / Illumina 1.9	561854	0	0-143	49	76.7283	140.141	pass	pass	warn	pass	fail	warn	pass	fail	pass	pass	pass
FD01874660.for.paired	FD01874660.for.paired	Original	Conventional base calls	Sanger / Illumina 1.9	448623	0	0-143	50	81.1991	139.82	pass	pass	pass	pass	fail	warn	pass	fail	pass	pass	pass
FD01874660.rev.paired	FD01874660.rev.paired	Original	Conventional base calls	Sanger / Illumina 1.9	448623	0	0-143	50	82.1507	139.896	pass	pass	warn	pass	warn	warn	pass	fail	pass	pass	pass
FD01874661.for.paired	FD01874661.for.paired	Original	Conventional base calls	Sanger / Illumina 1.9	561483	0	0-143	50	78.6907	140.934	pass	pass	pass	pass	fail	warn	pass	fail	pass	pass	pass
FD01874661.rev.paired	FD01874661.rev.paired	Original	Conventional base calls	Sanger / Illumina 1.9	561483	0	0-143	50	79.9954	140.166	pass	pass	warn	pass	warn	warn	pass	fail	pass	pass	pass
FD01874662.for.paired	FD01874662.for.paired	Original	Conventional base calls	Sanger / Illumina 1.9	444095	0	0-143	50	79.5548	141.012	pass	pass	pass	pass	fail	warn	pass	fail	pass	pass	pass
FD01874662.rev.paired	FD01874662.rev.paired	Original	Conventional base calls	Sanger / Illumina 1.9	444095	0	0-143	50	80.537	140.234	pass	pass	warn	pass	fail	warn	pass	fail	pass	pass	pass
FD01874663.for.paired	FD01874663.for.paired	Original	Conventional base calls	Sanger / Illumina 1.9	476067	0	0-143	50	76.5943	140.93	pass	pass	pass	pass	fail	warn	pass	fail	pass	pass	pass
FD01874663.rev.paired	FD01874663.rev.paired	Original	Conventional base calls	Sanger / Illumina 1.9	476067	0	0-143	50	77.5753	140.247	pass	pass	warn	pass	fail	warn	pass	fail	pass	pass	pass
FD01874664.for.paired	FD01874664.for.paired	Original	Conventional base calls	Sanger / Illumina 1.9	452409	0	0-143	50	80.1245	140.879	pass	pass	pass	pass	fail	warn	pass	fail	pass	pass	pass
FD01874664.rev.paired	FD01874664.rev.paired	Original	Conventional base calls	Sanger / Illumina 1.9	452409	0	0-143	50	81.2011	140.091	pass	pass	warn	pass	fail	warn	pass	fail	pass	pass	pass
FD01874666.for.paired	FD01874666.for.paired	Original	Conventional base calls	Sanger / Illumina 1.9	436471	0	0-143	50	79.9793	141.106	pass	pass	pass	pass	fail	warn	pass	fail	pass	pass	pass
FD01874666.rev.paired	FD01874666.rev.paired	Original	Conventional base calls	Sanger / Illumina 1.9	436471	0	0-143	50	80.7973	140.358	pass	pass	warn	pass	fail	warn	pass	fail	pass	pass	pass
FD01874668.for.paired	FD01874668.for.paired	Original	Conventional base calls	Sanger / Illumina 1.9	573082	0	0-143	51	77.6414	141.182	pass	pass	pass	pass	warn	warn	pass	fail	pass	pass	pass
FD01874668.rev.paired	FD01874668.rev.paired	Original	Conventional base calls	Sanger / Illumina 1.9	573082	0	0-143	51	78.5335	140.193	pass	pass	warn	pass	warn	warn	pass	fail	pass	pass	pass
FD01874669.for.paired	FD01874669.for.paired	Original	Conventional base calls	Sanger / Illumina 1.9	503305	0	0-143	49	76.854	141.245	pass	pass	pass	pass	fail	warn	pass	fail	pass	pass	pass
FD01874669.rev.paired	FD01874669.rev.paired	Original	Conventional base calls	Sanger / Illumina 1.9	503305	0	0-143	49	77.9595	140.411	pass	pass	warn	pass	fail	warn	pass	fail	pass	pass	pass
FD01874670.for.paired	FD01874670.for.paired	Original	Conventional base calls	Sanger / Illumina 1.9	213129	0	0-143	51	84.4419	140.783	pass	pass	pass	pass	warn	warn	pass	fail	pass	pass	pass
FD01874670.rev.paired	FD01874670.rev.paired	Original	Conventional base calls	Sanger / Illumina 1.9	213129	0	0-143	51	85.463	140.056	pass	pass	warn	pass	warn	warn	pass	fail	pass	pass	pass
FD01874671.for.paired	FD01874671.for.paired	Original	Conventional base calls	Sanger / Illumina 1.9	582781	0	0-143	50	75.641	141.242	pass	pass	pass	pass	fail	warn	pass	fail	pass	pass	pass
FD01874671.rev.paired	FD01874671.rev.paired	Original	Conventional base calls	Sanger / Illumina 1.9	582781	0	0-143	49	77.138	140.402	pass	pass	warn	pass	fail	warn	pass	fail	pass	pass	pass
FD01874672.for.paired	FD01874672.for.paired	Original	Conventional base calls	Sanger / Illumina 1.9	672435	0	0-143	49	71.0247	141.227	pass	pass	pass	pass	fail	warn	pass	fail	pass	pass	pass
FD01874672.rev.paired	FD01874672.rev.paired	Original	Conventional base calls	Sanger / Illumina 1.9	672435	0	0-143	49	72.2906	140.269	pass	pass	warn	pass	fail	warn	pass	fail	pass	pass	pass
FD01874673.for.paired	FD01874673.for.paired	Original	Conventional base calls	Sanger / Illumina 1.9	596386	0	0-143	50	78.3046	138.909	pass	pass	pass	pass	fail	fail	pass	fail	pass	warn	pass
FD01874673.rev.paired	FD01874673.rev.paired	Original	Conventional base calls	Sanger / Illumina 1.9	596386	0	0-143	50	79.056	138.762	pass	pass	warn	pass	fail	warn	pass	fail	pass	pass	pass
FD01876599.for.paired	FD01876599.for.paired	Original	Conventional base calls	Sanger / Illumina 1.9	200335	0	0-143	50	85.9988	139.587	pass	pass	warn	pass	fail	fail	pass	fail	pass	warn	pass
FD01876599.rev.paired	FD01876599.rev.paired	Original	Conventional base calls	Sanger / Illumina 1.9	200335	0	0-143	50	87.3122	139.196	pass	pass	pass	pass	fail	warn	pass	fail	pass	pass	pass
FD01876600.for.paired	FD01876600.for.paired	Original	Conventional base calls	Sanger / Illumina 1.9	536010	0	0-143	50	79.263	141.134	pass	pass	pass	pass	fail	warn	pass	fail	pass	pass	pass
FD01876600.rev.paired	FD01876600.rev.paired	Original	Conventional base calls	Sanger / Illumina 1.9	536010	0	0-143	50	81.0234	140.017	pass	pass	pass	pass	fail	warn	pass	fail	pass	pass	pass
FD01876601.for.paired	FD01876601.for.paired	Original	Conventional base calls	Sanger / Illumina 1.9	493498	0	0-143	50	80.3044	140.083	pass	pass	pass	pass	fail	fail	pass	fail	pass	warn	pass
FD01876601.rev.paired	FD01876601.rev.paired	Original	Conventional base calls	Sanger / Illumina 1.9	493498	0	0-143	50	81.9983	139.591	pass	pass	pass	pass	warn	warn	pass	fail	pass	pass	pass
FD01876602.for.paired	FD01876602.for.paired	Original	Conventional base calls	Sanger / Illumina 1.9	422996	0	0-143	50	83.5522	139.828	pass	pass	pass	pass	warn	fail	pass	fail	pass	warn	pass
FD01876602.rev.paired	FD01876602.rev.paired	Original	Conventional base calls	Sanger / Illumina 1.9	422996	0	0-143	50	84.8674	139.459	pass	pass	pass	pass	warn	warn	pass	fail	pass	pass	pass
FD01876603.for.paired	FD01876603.for.paired	Original	Conventional base calls	Sanger / Illumina 1.9	321439	0	0-143	50	84.4643	137.6	pass	pass	pass	pass	fail	fail	pass	fail	pass	warn	pass
FD01876603.rev.paired	FD01876603.rev.paired	Original	Conventional base calls	Sanger / Illumina 1.9	321439	0	0-143	50	85.8437	137.968	pass	pass	pass	pass	fail	warn	pass	fail	pass	pass	pass
FD01876604.for.paired	FD01876604.for.paired	Original	Conventional base calls	Sanger / Illumina 1.9	442911	0	0-143	50	82.3935	140.292	pass	pass	pass	pass	fail	warn	pass	fail	pass	warn	pass
FD01876604.rev.paired	FD01876604.rev.paired	Original	Conventional base calls	Sanger / Illumina 1.9	442911	0	0-143	50	84.4093	139.58	pass	pass	pass	pass	warn	warn	pass	fail	pass	pass	pass
FD01876606.for.paired	FD01876606.for.paired	Original	Conventional base calls	Sanger / Illumina 1.9	200071	0	0-143	50	88.7558	139.911	pass	pass	pass	pass	fail	fail	pass	fail	pass	warn	pass
FD01876606.rev.paired	FD01876606.rev.paired	Original	Conventional base calls	Sanger / Illumina 1.9	200071	0	0-143	50	89.7889	139.532	pass	pass	pass	pass	fail	warn	pass	fail	pass	pass	pass
FD01876607.for.paired	FD01876607.for.paired	Original	Conventional base calls	Sanger / Illumina 1.9	417211	0	0-143	50	84.0383	138.954	pass	pass	pass	pass	fail	fail	pass	fail	pass	warn	pass
FD01876607.rev.paired	FD01876607.rev.paired	Original	Conventional base calls	Sanger / Illumina 1.9	417211	0	0-143	50	85.2602	138.891	pass	pass	pass	pass	warn	warn	pass	fail	pass	pass	pass
FD01876608.for.paired	FD01876608.for.paired	Original	Conventional base calls	Sanger / Illumina 1.9	91907	0	0-143	50	89.2729	139.038	pass	pass	warn	pass	fail	fail	pass	fail	pass	warn	pass
FD01876608.rev.paired	FD01876608.rev.paired	Original	Conventional base calls	Sanger / Illumina 1.9	91907	0	0-143	50	90.3794	138.61	pass	pass	pass	pass	fail	warn	pass	fail	pass	pass	pass
FD01876609.for.paired	FD01876609.for.paired	Original	Conventional base calls	Sanger / Illumina 1.9	521054	0	0-143	50	78.304	140.578	pass	pass	pass	pass	fail	warn	pass	fail	pass	pass	pass
FD01876609.rev.paired	FD01876609.rev.paired	Original	Conventional base calls	Sanger / Illumina 1.9	521054	0	0-143	50	80.5348	139.556	pass	pass	pass	pass	warn	warn	pass	fail	pass	pass	pass
FD01876610.for.paired	FD01876610.for.paired	Original	Conventional base calls	Sanger / Illumina 1.9	614442	0	0-143	50	78.2338	139.856	pass	pass	pass	pass	fail	warn	pass	fail	pass	warn	pass
FD01876610.rev.paired	FD01876610.rev.paired	Original	Conventional base calls	Sanger / Illumina 1.9	614442	0	0-143	50	80.3895	139.521	pass	pass	pass	pass	fail	warn	pass	fail	pass	pass	pass
FD01876611.for.paired	FD01876611.for.paired	Original	Conventional base calls	Sanger / Illumina 1.9	573826	0	0-143	50	79.6247	140.14	pass	pass	pass	pass	fail	fail	pass	fail	pass	warn	pass
FD01876611.rev.paired	FD01876611.rev.paired	Original	Conventional base calls	Sanger / Illumina 1.9	573826	0	0-143	50	81.5569	139.325	pass	pass	pass	pass	warn	warn	pass	fail	pass	pass	pass
FD01876612.for.paired	FD01876612.for.paired	Original	Conventional base calls	Sanger / Illumina 1.9	418559	0	0-143	50	82.5972	139.024	pass	pass	pass	pass	warn	fail	pass	fail	pass	warn	pass
FD01876612.rev.paired	FD01876612.rev.paired	Original	Conventional base calls	Sanger / Illumina 1.9	418559	0	0-143	50	84.1497	139.026	pass	pass	pass	pass	warn	warn	pass	fail	pass	pass	pass
FD01876613.for.paired	FD01876613.for.paired	Original	Conventional base calls	Sanger / Illumina 1.9	362317	0	0-143	50	84.6369	139.882	pass	pass	pass	pass	warn	fail	pass	fail	pass	warn	pass
FD01876613.rev.paired	FD01876613.rev.paired	Original	Conventional base calls	Sanger / Illumina 1.9	362317	0	0-143	50	84.3868	139.895	pass	pass	pass	pass	fail	warn	pass	fail	pass	pass	pass
FD01876614.for.paired	FD01876614.for.paired	Original	Conventional base calls	Sanger / Illumina 1.9	328053	0	0-143	50	84.4773	140.777	pass	pass	pass	pass	fail	warn	pass	fail	pass	pass	pass
FD01876614.rev.paired	FD01876614.rev.paired	Original	Conventional base calls	Sanger / Illumina 1.9	328053	0	0-143	50	86.0721	139.904	pass	pass	pass	pass	fail	warn	pass	fail	pass	pass	pass
FD01876615.for.paired	FD01876615.for.paired	Original	Conventional base calls	Sanger / Illumina 1.9	317278	0	0-143	50	85.1569	139.922	pass	pass	pass	pass	fail	fail	pass	fail	pass	warn	pass
FD01876615.rev.paired	FD01876615.rev.paired	Original	Conventional base calls	Sanger / Illumina 1.9	317278	0	0-143	50	86.7412	139.369	pass	pass	pass	pass	warn	warn	pass	fail	pass	pass	pass
FD01876616.for.paired	FD01876616.for.paired	Original	Conventional base calls	Sanger / Illumina 1.9	176724	0	0-143	46	74.9319	140.649	pass	pass	pass	pass	fail	fail	pass	fail	pass	pass	pass
FD01876616.rev.paired	FD01876616.rev.paired	Original	Conventional base calls	Sanger / Illumina 1.9	176724	0	0-143	46	76.8984	139.317	pass	pass	pass	pass	fail	fail	pass	fail	pass	pass	pass
FD01876617.for.paired	FD01876617.for.paired	Original	Conventional base calls	Sanger / Illumina 1.9	697547	0	0-143	50	76.2736	141.23	pass	pass	pass	pass	fail	warn	pass	fail	pass	pass	pass
FD01876617.rev.paired	FD01876617.rev.paired	Original	Conventional base calls	Sanger / Illumina 1.9	697547	0	0-143	50	78.9587	139.714	pass	pass	pass	pass	warn	warn	pass	fail	pass	pass	pass
FD01876618.for.paired	FD01876618.for.paired	Original	Conventional base calls	Sanger / Illumina 1.9	460606	0	0-143	50	81.7426	140.402	pass	pass	pass	pass	fail	warn	pass	fail	pass	warn	pass
FD01876618.rev.paired	FD01876618.rev.paired	Original	Conventional base calls	Sanger / Illumina 1.9	460606	0	0-143	50	83.6861	139.782	pass	pass	pass	pass	fail	warn	pass	fail	pass	pass	pass
FD01876619.for.paired	FD01876619.for.paired	Original	Conventional base calls	Sanger / Illumina 1.9	495552	0	0-143	50	81.8513	140.214	pass	pass	pass	pass	fail	warn	pass	fail	pass	warn	pass
FD01876619.rev.paired	FD01876619.rev.paired	Original	Conventional base calls	Sanger / Illumina 1.9	495552	0	0-143	50	83.8293	139.554	pass	pass	pass	pass	warn	warn	pass	fail	pass	pass	pass
FD01876620.for.paired	FD01876620.for.paired	Original	Conventional base calls	Sanger / Illumina 1.9	449806	0	0-143	50	82.3563	140.36	pass	pass	pass	pass	fail	fail	pass	fail	pass	warn	pass
FD01876620.rev.paired	FD01876620.rev.paired	Original	Conventional base calls	Sanger / Illumina 1.9	449806	0	0-143	50	84.128	139.681	pass	pass	pass	pass	warn	warn	pass	fail	pass	pass	pass
FD01876621.for.paired	FD01876621.for.paired	Original	Conventional base calls	Sanger / Illumina 1.9	355709	0	0-143	50	84.7652	140.206	pass	pass	pass	pass	fail	warn	pass	fail	pass	warn	pass
FD01876621.rev.paired	FD01876621.rev.paired	Original	Conventional base calls	Sanger / Illumina 1.9	355709	0	0-143	50	87.1518	139.321	pass	pass	pass	pass	warn	warn	pass	fail	pass	pass	pass
FD01876622.for.paired	FD01876622.for.paired	Original	Conventional base calls	Sanger / Illumina 1.9	419112	0	0-143	50	83.074	140.418	pass	pass	pass	pass	warn	fail	pass	fail	pass	pass	pass
FD01876622.rev.paired	FD01876622.rev.paired	Original	Conventional base calls	Sanger / Illumina 1.9	419112	0	0-143	50	83.9452	139.983	pass	pass	pass	pass	warn	warn	pass	fail	pass	pass	pass
FD01876623.for.paired	FD01876623.for.paired	Original	Conventional base calls	Sanger / Illumina 1.9	299381	0	0-143	50	87.1404	139.913	pass	pass	pass	pass	warn	warn	pass	fail	pass	warn	pass
FD01876623.rev.paired	FD01876623.rev.paired	Original	Conventional base calls	Sanger / Illumina 1.9	299381	0	0-143	50	86.8966	140.03	pass	pass	pass	pass	warn	warn	pass	fail	pass	pass	pass
FD01876624.for.paired	FD01876624.for.paired	Original	Conventional base calls	Sanger / Illumina 1.9	489219	0	0-143	50	79.6095	139.708	pass	pass	warn	pass	fail	fail	pass	fail	pass	warn	pass
FD01876624.rev.paired	FD01876624.rev.paired	Original	Conventional base calls	Sanger / Illumina 1.9	489219	0	0-143	50	81.2743	139.549	pass	pass	pass	pass	fail	warn	pass	fail	pass	pass	pass
FD01876626.for.paired	FD01876626.for.paired	Original	Conventional base calls	Sanger / Illumina 1.9	452154	0	0-143	50	79.7966	140.991	pass	pass	pass	pass	fail	warn	pass	fail	pass	pass	pass
FD01876626.rev.paired	FD01876626.rev.paired	Original	Conventional base calls	Sanger / Illumina 1.9	452154	0	0-143	50	81.3515	139.823	pass	pass	pass	pass	warn	warn	pass	fail	pass	pass	pass
FD01876627.for.paired	FD01876627.for.paired	Original	Conventional base calls	Sanger / Illumina 1.9	601457	0	0-143	50	79.276	140.723	pass	pass	pass	pass	warn	warn	pass	fail	pass	pass	pass
FD01876627.rev.paired	FD01876627.rev.paired	Original	Conventional base calls	Sanger / Illumina 1.9	601457	0	0-143	50	80.8019	139.728	pass	pass	pass	pass	warn	warn	pass	fail	pass	pass	pass
FD01876628.for.paired	FD01876628.for.paired	Original	Conventional base calls	Sanger / Illumina 1.9	403662	0	0-143	50	82.9102	140.051	pass	pass	pass	pass	warn	fail	pass	fail	pass	warn	pass
FD01876628.rev.paired	FD01876628.rev.paired	Original	Conventional base calls	Sanger / Illumina 1.9	403662	0	0-143	50	83.9254	139.801	pass	pass	pass	pass	warn	warn	pass	fail	pass	pass	pass
FD01876629.for.paired	FD01876629.for.paired	Original	Conventional base calls	Sanger / Illumina 1.9	387586	0	0-143	50	83.5162	140.177	pass	pass	pass	pass	fail	warn	pass	fail	pass	warn	pass
FD01876629.rev.paired	FD01876629.rev.paired	Original	Conventional base calls	Sanger / Illumina 1.9	387586	0	0-143	50	84.5923	139.591	pass	pass	pass	pass	warn	warn	pass	fail	pass	pass	pass
FD01876630.for.paired	FD01876630.for.paired	Original	Conventional base calls	Sanger / Illumina 1.9	358353	0	0-143	50	84.4852	140.076	pass	pass	pass	pass	fail	fail	pass	fail	pass	warn	pass
FD01876630.rev.paired	FD01876630.rev.paired	Original	Conventional base calls	Sanger / Illumina 1.9	358353	0	0-143	50	85.7341	139.514	pass	pass	pass	pass	warn	warn	pass	fail	pass	pass	pass
FD01876631.for.paired	FD01876631.for.paired	Original	Conventional base calls	Sanger / Illumina 1.9	340267	0	0-143	50	85.7428	140.049	pass	pass	pass	pass	warn	fail	pass	fail	pass	warn	pass
FD01876631.rev.paired	FD01876631.rev.paired	Original	Conventional base calls	Sanger / Illumina 1.9	340267	0	0-143	50	85.8253	140.01	pass	pass	pass	pass	fail	warn	pass	fail	pass	pass	pass
FD01876632.for.paired	FD01876632.for.paired	Original	Conventional base calls	Sanger / Illumina 1.9	232642	0	0-143	50	79.1677	141.088	pass	pass	pass	pass	fail	warn	pass	fail	pass	pass	pass
FD01876632.rev.paired	FD01876632.rev.paired	Original	Conventional base calls	Sanger / Illumina 1.9	232642	0	0-143	50	80.9512	139.118	pass	pass	pass	pass	fail	warn	pass	fail	pass	pass	pass
FD01876633.for.paired	FD01876633.for.paired	Original	Conventional base calls	Sanger / Illumina 1.9	361935	0	0-143	50	85.6116	140.114	pass	pass	pass	pass	fail	warn	pass	fail	pass	warn	pass
FD01876633.rev.paired	FD01876633.rev.paired	Original	Conventional base calls	Sanger / Illumina 1.9	361935	0	0-143	50	85.8813	140.006	pass	pass	pass	pass	fail	warn	pass	fail	pass	pass	pass
FD01876635.for.paired	FD01876635.for.paired	Original	Conventional base calls	Sanger / Illumina 1.9	634918	0	0-143	50	79.1598	139.431	pass	pass	pass	pass	warn	fail	pass	fail	pass	warn	pass
FD01876635.rev.paired	FD01876635.rev.paired	Original	Conventional base calls	Sanger / Illumina 1.9	634918	0	0-143	50	79.9265	139.522	pass	pass	pass	pass	warn	warn	pass	fail	pass	pass	pass
FD01876636.for.paired	FD01876636.for.paired	Original	Conventional base calls	Sanger / Illumina 1.9	691136	0	0-143	50	76.7745	140.301	pass	pass	pass	pass	fail	fail	pass	fail	pass	warn	pass
FD01876636.rev.paired	FD01876636.rev.paired	Original	Conventional base calls	Sanger / Illumina 1.9	691136	0	0-143	50	79.1123	139.585	pass	pass	pass	pass	fail	warn	pass	fail	pass	pass	pass
FD01876637.for.paired	FD01876637.for.paired	Original	Conventional base calls	Sanger / Illumina 1.9	351065	0	0-143	50	84.9022	139.458	pass	pass	pass	pass	fail	fail	pass	fail	pass	warn	pass
FD01876637.rev.paired	FD01876637.rev.paired	Original	Conventional base calls	Sanger / Illumina 1.9	351065	0	0-143	50	86.1205	139.399	pass	pass	pass	pass	warn	warn	pass	fail	pass	pass	pass
FD01876638.for.paired	FD01876638.for.paired	Original	Conventional base calls	Sanger / Illumina 1.9	380891	0	0-143	50	83.8483	139.938	pass	pass	warn	pass	fail	warn	pass	fail	pass	pass	pass
FD01876638.rev.paired	FD01876638.rev.paired	Original	Conventional base calls	Sanger / Illumina 1.9	380891	0	0-143	50	85.4208	139.811	pass	pass	pass	pass	warn	warn	pass	fail	pass	pass	pass
FD01876639.for.paired	FD01876639.for.paired	Original	Conventional base calls	Sanger / Illumina 1.9	389053	0	0-143	50	81.3426	140.614	pass	pass	pass	pass	warn	warn	pass	fail	pass	pass	pass
FD01876639.rev.paired	FD01876639.rev.paired	Original	Conventional base calls	Sanger / Illumina 1.9	389053	0	0-143	50	82.7794	139.81	pass	pass	pass	pass	warn	warn	pass	fail	pass	pass	pass
FD01876640.for.paired	FD01876640.for.paired	Original	Conventional base calls	Sanger / Illumina 1.9	180048	0	0-143	49	79.1582	140.177	pass	pass	pass	pass	fail	warn	pass	fail	pass	pass	pass
FD01876640.rev.paired	FD01876640.rev.paired	Original	Conventional base calls	Sanger / Illumina 1.9	180048	0	0-143	49	80.9287	138.998	pass	pass	pass	pass	fail	warn	pass	fail	pass	pass	pass
FD01876641.for.paired	FD01876641.for.paired	Original	Conventional base calls	Sanger / Illumina 1.9	570582	0	0-143	50	79.8781	140.628	pass	pass	pass	pass	fail	warn	pass	fail	pass	pass	pass
FD01876641.rev.paired	FD01876641.rev.paired	Original	Conventional base calls	Sanger / Illumina 1.9	570582	0	0-143	50	81.8567	140.022	pass	pass	pass	pass	fail	warn	pass	fail	pass	pass	pass
FD01876642.for.paired	FD01876642.for.paired	Original	Conventional base calls	Sanger / Illumina 1.9	377604	0	0-143	50	83.5011	140.399	pass	pass	warn	pass	fail	warn	pass	fail	pass	pass	pass
FD01876642.rev.paired	FD01876642.rev.paired	Original	Conventional base calls	Sanger / Illumina 1.9	377604	0	0-143	50	85.4299	139.451	pass	pass	pass	pass	warn	warn	pass	fail	pass	pass	pass
FD01876643.for.paired	FD01876643.for.paired	Original	Conventional base calls	Sanger / Illumina 1.9	464884	0	0-143	50	80.6447	139.716	pass	pass	warn	pass	warn	warn	pass	fail	pass	pass	pass
FD01876643.rev.paired	FD01876643.rev.paired	Original	Conventional base calls	Sanger / Illumina 1.9	464884	0	0-143	50	82.803	139.265	pass	pass	pass	pass	warn	warn	pass	fail	pass	pass	pass
FD01876644.for.paired	FD01876644.for.paired	Original	Conventional base calls	Sanger / Illumina 1.9	315278	0	0-143	50	84.894	139.88	pass	pass	pass	pass	warn	fail	pass	fail	pass	warn	pass
FD01876644.rev.paired	FD01876644.rev.paired	Original	Conventional base calls	Sanger / Illumina 1.9	315278	0	0-143	50	86.2227	139.498	pass	pass	warn	pass	warn	warn	pass	fail	pass	pass	pass
FD01876645.for.paired	FD01876645.for.paired	Original	Conventional base calls	Sanger / Illumina 1.9	549330	0	0-143	50	78.8734	140.828	pass	pass	pass	pass	fail	warn	pass	fail	pass	pass	pass
FD01876645.rev.paired	FD01876645.rev.paired	Original	Conventional base calls	Sanger / Illumina 1.9	549330	0	0-143	50	80.6286	139.824	pass	pass	pass	pass	fail	warn	pass	fail	pass	pass	pass
FD01876646.for.paired	FD01876646.for.paired	Original	Conventional base calls	Sanger / Illumina 1.9	505685	0	0-143	50	80.1952	140.625	pass	pass	pass	pass	fail	warn	pass	fail	pass	pass	pass
FD01876646.rev.paired	FD01876646.rev.paired	Original	Conventional base calls	Sanger / Illumina 1.9	505685	0	0-143	50	81.4649	139.777	pass	pass	pass	pass	fail	warn	pass	fail	pass	pass	pass
FD01876647.for.paired	FD01876647.for.paired	Original	Conventional base calls	Sanger / Illumina 1.9	413969	0	0-143	50	83.3291	139.73	pass	pass	pass	pass	warn	fail	pass	fail	pass	warn	pass
FD01876647.rev.paired	FD01876647.rev.paired	Original	Conventional base calls	Sanger / Illumina 1.9	413969	0	0-143	50	83.9178	139.547	pass	pass	pass	pass	fail	warn	pass	fail	pass	pass	pass
FD01876648.for.paired	FD01876648.for.paired	Original	Conventional base calls	Sanger / Illumina 1.9	210484	0	0-143	50	81.0384	141.129	pass	pass	pass	pass	fail	warn	pass	fail	pass	pass	pass
FD01876648.rev.paired	FD01876648.rev.paired	Original	Conventional base calls	Sanger / Illumina 1.9	210484	0	0-143	50	83.488	138.977	pass	pass	pass	pass	warn	warn	pass	fail	pass	pass	pass
FD01876649.for.paired	FD01876649.for.paired	Original	Conventional base calls	Sanger / Illumina 1.9	370195	0	0-143	50	83.6577	140.815	pass	pass	pass	pass	fail	fail	pass	fail	pass	pass	pass
FD01876649.rev.paired	FD01876649.rev.paired	Original	Conventional base calls	Sanger / Illumina 1.9	370195	0	0-143	50	85.3641	139.834	pass	pass	pass	pass	fail	warn	pass	fail	pass	pass	pass
FD01876650.for.paired	FD01876650.for.paired	Original	Conventional base calls	Sanger / Illumina 1.9	522372	0	0-143	50	80.2591	140.494	pass	pass	pass	pass	fail	fail	pass	fail	pass	pass	pass
FD01876650.rev.paired	FD01876650.rev.paired	Original	Conventional base calls	Sanger / Illumina 1.9	522372	0	0-143	50	82.4234	139.615	pass	pass	pass	pass	warn	warn	pass	fail	pass	pass	pass
FD01876651.for.paired	FD01876651.for.paired	Original	Conventional base calls	Sanger / Illumina 1.9	482430	0	0-143	50	80.6073	137.558	pass	pass	pass	pass	fail	fail	pass	fail	pass	warn	pass
FD01876651.rev.paired	FD01876651.rev.paired	Original	Conventional base calls	Sanger / Illumina 1.9	482430	0	0-143	50	82.1978	137.991	pass	pass	pass	pass	fail	warn	pass	fail	pass	pass	pass
FD01876652.for.paired	FD01876652.for.paired	Original	Conventional base calls	Sanger / Illumina 1.9	439961	0	0-143	50	82.1928	139.769	pass	pass	pass	pass	fail	fail	pass	fail	pass	warn	pass
FD01876652.rev.paired	FD01876652.rev.paired	Original	Conventional base calls	Sanger / Illumina 1.9	439961	0	0-143	50	83.6782	139.535	pass	pass	pass	pass	fail	warn	pass	fail	pass	pass	pass
FD01876653.for.paired	FD01876653.for.paired	Original	Conventional base calls	Sanger / Illumina 1.9	475783	0	0-143	50	81.5816	139.962	pass	pass	pass	pass	fail	fail	pass	fail	pass	warn	pass
FD01876653.rev.paired	FD01876653.rev.paired	Original	Conventional base calls	Sanger / Illumina 1.9	475783	0	0-143	50	83.4676	139.3	pass	pass	pass	pass	fail	warn	pass	fail	pass	pass	pass
FD01876654.for.paired	FD01876654.for.paired	Original	Conventional base calls	Sanger / Illumina 1.9	530686	0	0-143	50	80.4896	140.062	pass	pass	pass	pass	fail	fail	pass	fail	pass	warn	pass
FD01876654.rev.paired	FD01876654.rev.paired	Original	Conventional base calls	Sanger / Illumina 1.9	530686	0	0-143	50	82.2077	139.602	pass	pass	pass	pass	fail	warn	pass	fail	pass	pass	pass
FD01876655.for.paired	FD01876655.for.paired	Original	Conventional base calls	Sanger / Illumina 1.9	366217	0	0-143	51	83.3654	137.066	pass	pass	pass	pass	fail	fail	pass	fail	pass	warn	pass
FD01876655.rev.paired	FD01876655.rev.paired	Original	Conventional base calls	Sanger / Illumina 1.9	366217	0	0-143	50	85.1666	137.72	pass	pass	pass	pass	fail	warn	pass	fail	pass	pass	pass
FD01876656.for.paired	FD01876656.for.paired	Original	Conventional base calls	Sanger / Illumina 1.9	652717	0	0-143	50	77.5087	140.83	pass	pass	pass	pass	fail	warn	pass	fail	pass	pass	pass
FD01876656.rev.paired	FD01876656.rev.paired	Original	Conventional base calls	Sanger / Illumina 1.9	652717	0	0-143	50	80.9022	139.295	pass	pass	pass	pass	warn	warn	pass	fail	pass	pass	pass
FD01876658.for.paired	FD01876658.for.paired	Original	Conventional base calls	Sanger / Illumina 1.9	334656	0	0-143	50	85.5812	137.591	pass	pass	pass	pass	warn	fail	pass	fail	pass	warn	pass
FD01876658.rev.paired	FD01876658.rev.paired	Original	Conventional base calls	Sanger / Illumina 1.9	334656	0	0-143	50	85.2085	138.549	pass	pass	pass	pass	warn	warn	pass	fail	pass	pass	pass
FD01876659.for.paired	FD01876659.for.paired	Original	Conventional base calls	Sanger / Illumina 1.9	362204	0	0-143	50	84.9689	140.475	pass	pass	pass	pass	fail	fail	pass	fail	pass	warn	pass
FD01876659.rev.paired	FD01876659.rev.paired	Original	Conventional base calls	Sanger / Illumina 1.9	362204	0	0-143	50	86.4963	139.786	pass	pass	pass	pass	fail	warn	pass	fail	pass	pass	pass
FD01876660.for.paired	FD01876660.for.paired	Original	Conventional base calls	Sanger / Illumina 1.9	423744	0	0-143	50	82.3503	139.375	pass	pass	pass	pass	warn	fail	pass	fail	pass	warn	pass
FD01876660.rev.paired	FD01876660.rev.paired	Original	Conventional base calls	Sanger / Illumina 1.9	423744	0	0-143	50	84.2952	138.863	pass	pass	pass	pass	warn	warn	pass	fail	pass	pass	pass
FD01876661.for.paired	FD01876661.for.paired	Original	Conventional base calls	Sanger / Illumina 1.9	423730	0	0-143	50	83.3818	140.409	pass	pass	pass	pass	fail	warn	pass	fail	pass	pass	pass
FD01876661.rev.paired	FD01876661.rev.paired	Original	Conventional base calls	Sanger / Illumina 1.9	423730	0	0-143	50	85.2726	139.565	pass	pass	pass	pass	fail	warn	pass	fail	pass	pass	pass
FD01876662.for.paired	FD01876662.for.paired	Original	Conventional base calls	Sanger / Illumina 1.9	363961	0	0-143	50	84.1157	140.581	pass	pass	pass	pass	fail	warn	pass	fail	pass	pass	pass
FD01876662.rev.paired	FD01876662.rev.paired	Original	Conventional base calls	Sanger / Illumina 1.9	363961	0	0-143	50	85.8091	139.735	pass	pass	pass	pass	warn	warn	pass	fail	pass	pass	pass
FD01876663.for.paired	FD01876663.for.paired	Original	Conventional base calls	Sanger / Illumina 1.9	448956	0	0-143	50	81.684	141.219	pass	pass	pass	pass	warn	warn	pass	fail	pass	pass	pass
FD01876663.rev.paired	FD01876663.rev.paired	Original	Conventional base calls	Sanger / Illumina 1.9	448956	0	0-143	50	83.8683	139.739	pass	pass	pass	pass	warn	warn	pass	fail	pass	pass	pass
FD01876664.for.paired	FD01876664.for.paired	Original	Conventional base calls	Sanger / Illumina 1.9	205077	0	0-143	50	85.0582	140.454	pass	pass	pass	pass	fail	fail	pass	fail	pass	pass	pass
FD01876664.rev.paired	FD01876664.rev.paired	Original	Conventional base calls	Sanger / Illumina 1.9	205077	0	0-143	50	86.8547	138.924	pass	pass	pass	pass	fail	warn	pass	fail	pass	pass	pass
FD01876665.for.paired	FD01876665.for.paired	Original	Conventional base calls	Sanger / Illumina 1.9	334541	0	0-143	50	84.8428	140.898	pass	pass	pass	pass	fail	warn	pass	fail	pass	pass	pass
FD01876665.rev.paired	FD01876665.rev.paired	Original	Conventional base calls	Sanger / Illumina 1.9	334541	0	0-143	50	86.4836	139.922	pass	pass	pass	pass	warn	warn	pass	fail	pass	pass	pass
FD01876666.for.paired	FD01876666.for.paired	Original	Conventional base calls	Sanger / Illumina 1.9	646785	0	0-143	50	76.7636	140.815	pass	pass	pass	pass	fail	warn	pass	fail	pass	pass	pass
FD01876666.rev.paired	FD01876666.rev.paired	Original	Conventional base calls	Sanger / Illumina 1.9	646785	0	0-143	50	79.4757	139.547	pass	pass	pass	pass	fail	warn	pass	fail	pass	pass	pass
FD01876668.for.paired	FD01876668.for.paired	Original	Conventional base calls	Sanger / Illumina 1.9	469047	0	0-143	50	81.039	140.474	pass	pass	pass	pass	fail	warn	pass	fail	pass	warn	pass
FD01876668.rev.paired	FD01876668.rev.paired	Original	Conventional base calls	Sanger / Illumina 1.9	469047	0	0-143	50	83.0193	139.492	pass	pass	pass	pass	warn	warn	pass	fail	pass	pass	pass
FD01876669.for.paired	FD01876669.for.paired	Original	Conventional base calls	Sanger / Illumina 1.9	380565	0	0-143	50	84.4838	139.131	pass	pass	pass	pass	fail	fail	pass	fail	pass	warn	pass
FD01876669.rev.paired	FD01876669.rev.paired	Original	Conventional base calls	Sanger / Illumina 1.9	380565	0	0-143	50	86.0816	138.657	pass	pass	pass	pass	warn	warn	pass	fail	pass	pass	pass
FD01876670.for.paired	FD01876670.for.paired	Original	Conventional base calls	Sanger / Illumina 1.9	130766	0	0-143	50	86.402	140.645	pass	pass	pass	pass	fail	warn	pass	fail	pass	pass	pass
FD01876670.rev.paired	FD01876670.rev.paired	Original	Conventional base calls	Sanger / Illumina 1.9	130766	0	0-143	50	87.8956	139.637	pass	pass	pass	pass	fail	warn	pass	fail	pass	pass	pass
FD01876671.for.paired	FD01876671.for.paired	Original	Conventional base calls	Sanger / Illumina 1.9	362727	0	0-143	50	84.4225	139.935	pass	pass	pass	pass	warn	fail	pass	fail	pass	warn	pass
FD01876671.rev.paired	FD01876671.rev.paired	Original	Conventional base calls	Sanger / Illumina 1.9	362727	0	0-143	50	85.8941	139.652	pass	pass	pass	pass	warn	warn	pass	fail	pass	pass	pass
FD01876672.for.paired	FD01876672.for.paired	Original	Conventional base calls	Sanger / Illumina 1.9	316189	0	0-143	50	80.6775	140.421	pass	pass	pass	pass	fail	warn	pass	fail	pass	pass	pass
FD01876672.rev.paired	FD01876672.rev.paired	Original	Conventional base calls	Sanger / Illumina 1.9	316189	0	0-143	50	81.6269	139.637	pass	pass	pass	pass	fail	warn	pass	fail	pass	pass	pass
FD01876673.for.paired	FD01876673.for.paired	Original	Conventional base calls	Sanger / Illumina 1.9	594238	0	0-143	50	76.696	141.127	pass	pass	pass	pass	fail	warn	pass	fail	pass	pass	pass
FD01876673.rev.paired	FD01876673.rev.paired	Original	Conventional base calls	Sanger / Illumina 1.9	594238	0	0-143	50	78.9064	139.622	pass	pass	pass	pass	warn	warn	pass	fail	pass	pass	pass
FD01876674.for.paired	FD01876674.for.paired	Original	Conventional base calls	Sanger / Illumina 1.9	460085	0	0-143	50	79.7041	140.693	pass	pass	pass	pass	fail	warn	pass	fail	pass	pass	pass
FD01876674.rev.paired	FD01876674.rev.paired	Original	Conventional base calls	Sanger / Illumina 1.9	460085	0	0-143	50	81.479	139.766	pass	pass	pass	pass	warn	warn	pass	fail	pass	pass	pass
FD01876675.for.paired	FD01876675.for.paired	Original	Conventional base calls	Sanger / Illumina 1.9	434343	0	0-143	50	80.645	140.916	pass	pass	pass	pass	fail	warn	pass	fail	pass	pass	pass
FD01876675.rev.paired	FD01876675.rev.paired	Original	Conventional base calls	Sanger / Illumina 1.9	434343	0	0-143	50	82.8454	139.486	pass	pass	pass	pass	fail	warn	pass	fail	pass	pass	pass
FD01876676.for.paired	FD01876676.for.paired	Original	Conventional base calls	Sanger / Illumina 1.9	412961	0	0-143	50	83.8151	139.084	pass	pass	pass	pass	fail	fail	pass	fail	pass	warn	pass
FD01876676.rev.paired	FD01876676.rev.paired	Original	Conventional base calls	Sanger / Illumina 1.9	412961	0	0-143	50	85.3809	139.079	pass	pass	pass	pass	warn	warn	pass	fail	pass	pass	pass
FD01876677.for.paired	FD01876677.for.paired	Original	Conventional base calls	Sanger / Illumina 1.9	387760	0	0-143	50	84.2838	140.056	pass	pass	pass	pass	fail	fail	pass	fail	pass	warn	pass
FD01876677.rev.paired	FD01876677.rev.paired	Original	Conventional base calls	Sanger / Illumina 1.9	387760	0	0-143	50	85.7851	139.583	pass	pass	pass	pass	fail	warn	pass	fail	pass	pass	pass
FD01876678.for.paired	FD01876678.for.paired	Original	Conventional base calls	Sanger / Illumina 1.9	546978	0	0-143	50	80.9636	140.626	pass	pass	pass	pass	fail	warn	pass	fail	pass	pass	pass
FD01876678.rev.paired	FD01876678.rev.paired	Original	Conventional base calls	Sanger / Illumina 1.9	546978	0	0-143	50	82.8068	139.968	pass	pass	pass	pass	warn	warn	pass	fail	pass	pass	pass
FD01876679.for.paired	FD01876679.for.paired	Original	Conventional base calls	Sanger / Illumina 1.9	356358	0	0-143	50	84.3593	140.348	pass	pass	warn	pass	warn	warn	pass	fail	pass	pass	pass
FD01876679.rev.paired	FD01876679.rev.paired	Original	Conventional base calls	Sanger / Illumina 1.9	356358	0	0-143	50	85.7687	140.122	pass	pass	pass	pass	warn	warn	pass	fail	pass	pass	pass
FD01876680.for.paired	FD01876680.for.paired	Original	Conventional base calls	Sanger / Illumina 1.9	469784	0	0-143	50	79.1112	140.523	pass	pass	pass	pass	fail	warn	pass	fail	pass	pass	pass
FD01876680.rev.paired	FD01876680.rev.paired	Original	Conventional base calls	Sanger / Illumina 1.9	469784	0	0-143	50	81.6097	139.549	pass	pass	pass	pass	fail	warn	pass	fail	pass	pass	pass
FD01876681.for.paired	FD01876681.for.paired	Original	Conventional base calls	Sanger / Illumina 1.9	635755	0	0-143	50	76.8259	141.062	pass	pass	pass	pass	fail	warn	pass	fail	pass	pass	pass
FD01876681.rev.paired	FD01876681.rev.paired	Original	Conventional base calls	Sanger / Illumina 1.9	635755	0	0-143	50	78.8644	139.781	pass	pass	pass	pass	warn	warn	pass	fail	pass	pass	pass
FD01876682.for.paired	FD01876682.for.paired	Original	Conventional base calls	Sanger / Illumina 1.9	379033	0	0-143	50	83.981	139.969	pass	pass	pass	pass	fail	fail	pass	fail	pass	warn	pass
FD01876682.rev.paired	FD01876682.rev.paired	Original	Conventional base calls	Sanger / Illumina 1.9	379033	0	0-143	50	84.9667	139.593	pass	pass	pass	pass	warn	warn	pass	fail	pass	pass	pass
FD01876683.for.paired	FD01876683.for.paired	Original	Conventional base calls	Sanger / Illumina 1.9	473006	0	0-143	50	81.3392	140.735	pass	pass	pass	pass	fail	warn	pass	fail	pass	pass	pass
FD01876683.rev.paired	FD01876683.rev.paired	Original	Conventional base calls	Sanger / Illumina 1.9	473006	0	0-143	50	82.5702	140.033	pass	pass	pass	pass	fail	warn	pass	fail	pass	pass	pass
FD01876684.for.paired	FD01876684.for.paired	Original	Conventional base calls	Sanger / Illumina 1.9	306083	0	0-143	50	85.9952	138.53	pass	pass	pass	pass	warn	fail	pass	fail	pass	warn	pass
FD01876684.rev.paired	FD01876684.rev.paired	Original	Conventional base calls	Sanger / Illumina 1.9	306083	0	0-143	50	87.0081	138.705	pass	pass	pass	pass	warn	warn	pass	fail	pass	pass	pass
FD01876685.for.paired	FD01876685.for.paired	Original	Conventional base calls	Sanger / Illumina 1.9	383424	0	0-143	50	83.4556	140.525	pass	pass	pass	pass	warn	fail	pass	fail	pass	pass	pass
FD01876685.rev.paired	FD01876685.rev.paired	Original	Conventional base calls	Sanger / Illumina 1.9	383424	0	0-143	50	84.6378	139.749	pass	pass	pass	pass	warn	warn	pass	fail	pass	pass	pass
FD01876686.for.paired	FD01876686.for.paired	Original	Conventional base calls	Sanger / Illumina 1.9	279158	0	0-143	50	87.8179	140.769	pass	pass	pass	pass	warn	warn	pass	fail	pass	pass	pass
FD01876686.rev.paired	FD01876686.rev.paired	Original	Conventional base calls	Sanger / Illumina 1.9	279158	0	0-143	50	87.5706	140.389	pass	pass	pass	pass	warn	warn	pass	fail	pass	pass	pass
FD01876687.for.paired	FD01876687.for.paired	Original	Conventional base calls	Sanger / Illumina 1.9	313169	0	0-143	50	88.3962	140.005	pass	pass	pass	pass	warn	warn	pass	fail	pass	pass	pass
FD01876687.rev.paired	FD01876687.rev.paired	Original	Conventional base calls	Sanger / Illumina 1.9	313169	0	0-143	50	86.8075	140.4	pass	pass	pass	pass	fail	warn	pass	fail	pass	pass	pass
FD01876688.for.paired	FD01876688.for.paired	Original	Conventional base calls	Sanger / Illumina 1.9	494656	0	0-143	50	77.6011	141.203	pass	pass	pass	pass	fail	warn	pass	fail	pass	pass	pass
FD01876688.rev.paired	FD01876688.rev.paired	Original	Conventional base calls	Sanger / Illumina 1.9	494656	0	0-143	50	80.103	139.591	pass	pass	pass	pass	fail	warn	pass	fail	pass	pass	pass
FD01876689.for.paired	FD01876689.for.paired	Original	Conventional base calls	Sanger / Illumina 1.9	435119	0	0-143	50	81.937	140.793	pass	pass	pass	pass	fail	warn	pass	fail	pass	pass	pass
FD01876689.rev.paired	FD01876689.rev.paired	Original	Conventional base calls	Sanger / Illumina 1.9	435119	0	0-143	50	83.64	140.034	pass	pass	pass	pass	fail	warn	pass	fail	pass	pass	pass
FD01876690.for.paired	FD01876690.for.paired	Original	Conventional base calls	Sanger / Illumina 1.9	464250	0	0-143	50	80.9272	140.218	pass	pass	pass	pass	fail	fail	pass	fail	pass	warn	pass
FD01876690.rev.paired	FD01876690.rev.paired	Original	Conventional base calls	Sanger / Illumina 1.9	464250	0	0-143	50	82.5589	139.894	pass	pass	pass	pass	fail	warn	pass	fail	pass	pass	pass
FD01876691.for.paired	FD01876691.for.paired	Original	Conventional base calls	Sanger / Illumina 1.9	550364	0	0-143	50	78.7122	141.06	pass	pass	pass	pass	warn	warn	pass	fail	pass	pass	pass
FD01876691.rev.paired	FD01876691.rev.paired	Original	Conventional base calls	Sanger / Illumina 1.9	550364	0	0-143	50	81.0301	139.779	pass	pass	pass	pass	warn	warn	pass	fail	pass	pass	pass
FD01876692.for.paired	FD01876692.for.paired	Original	Conventional base calls	Sanger / Illumina 1.9	486776	0	0-143	51	81.469	139.52	pass	pass	pass	pass	fail	fail	pass	fail	pass	warn	pass
FD01876692.rev.paired	FD01876692.rev.paired	Original	Conventional base calls	Sanger / Illumina 1.9	486776	0	0-143	51	82.8821	139.329	pass	pass	pass	pass	warn	warn	pass	fail	pass	pass	pass
FD01876694.for.paired	FD01876694.for.paired	Original	Conventional base calls	Sanger / Illumina 1.9	406300	0	0-143	50	83.5886	140.07	pass	pass	pass	pass	fail	warn	pass	fail	pass	warn	pass
FD01876694.rev.paired	FD01876694.rev.paired	Original	Conventional base calls	Sanger / Illumina 1.9	406300	0	0-143	50	84.9137	139.702	pass	pass	pass	pass	warn	warn	pass	fail	pass	pass	pass
FD01876695.for.paired	FD01876695.for.paired	Original	Conventional base calls	Sanger / Illumina 1.9	147000	0	0-143	50	85.6	139.993	pass	pass	pass	pass	fail	warn	pass	fail	pass	pass	pass
FD01876695.rev.paired	FD01876695.rev.paired	Original	Conventional base calls	Sanger / Illumina 1.9	147000	0	0-143	50	86.987	138.851	pass	pass	pass	pass	warn	warn	pass	fail	pass	pass	pass
FD01872847.comp.rev.paired	FD01872847.comp.rev.paired	Combined	Conventional base calls	Sanger / Illumina 1.9	2774793	0	0-242	51	60.655	224.373	pass	pass	fail	pass	fail	fail	pass	fail	warn	pass	pass
FD01872847.comp.trim.for.paired	FD01872847.comp.trim.for.paired	Combined	Conventional base calls	Sanger / Illumina 1.9	2774793	0	0-242	51	59.7351	224.154	pass	pass	fail	pass	fail	fail	pass	fail	warn	pass	pass
FD01872850.comp.rev.paired	FD01872850.comp.rev.paired	Combined	Conventional base calls	Sanger / Illumina 1.9	2984234	0	0-242	50	66.1811	218.087	pass	pass	fail	pass	fail	fail	pass	fail	warn	pass	pass
FD01872850.comp.trim.for.paired	FD01872850.comp.trim.for.paired	Combined	Conventional base calls	Sanger / Illumina 1.9	2984234	0	0-242	50	64.5361	216.1	pass	pass	fail	pass	fail	fail	pass	fail	warn	warn	pass
FD01872851.comp.rev.paired	FD01872851.comp.rev.paired	Combined	Conventional base calls	Sanger / Illumina 1.9	2991708	0	0-242	50	60.899	218.71	pass	pass	fail	pass	fail	fail	pass	fail	warn	pass	pass
FD01872851.comp.trim.for.paired	FD01872851.comp.trim.for.paired	Combined	Conventional base calls	Sanger / Illumina 1.9	2991708	0	0-242	50	58.6104	217.137	pass	pass	fail	pass	fail	fail	pass	fail	warn	warn	pass
FD01872852.comp.rev.paired	FD01872852.comp.rev.paired	Combined	Conventional base calls	Sanger / Illumina 1.9	2772824	0	0-242	50	67.7911	218.687	pass	pass	fail	pass	fail	fail	pass	fail	warn	pass	pass
FD01872852.comp.trim.for.paired	FD01872852.comp.trim.for.paired	Combined	Conventional base calls	Sanger / Illumina 1.9	2772824	0	0-242	50	66.0667	217.597	pass	pass	fail	pass	fail	fail	pass	fail	warn	warn	pass
FD01872853.comp.rev.paired	FD01872853.comp.rev.paired	Combined	Conventional base calls	Sanger / Illumina 1.9	2523063	0	0-242	49	65.204	219.171	pass	pass	fail	pass	fail	fail	pass	fail	warn	pass	pass
FD01872853.comp.trim.for.paired	FD01872853.comp.trim.for.paired	Combined	Conventional base calls	Sanger / Illumina 1.9	2523063	0	0-242	49	63.697	218.948	pass	pass	fail	pass	fail	fail	pass	fail	warn	pass	pass
FD01872854.comp.rev.paired	FD01872854.comp.rev.paired	Combined	Conventional base calls	Sanger / Illumina 1.9	2786966	0	0-242	49	64.1107	224.73	pass	pass	fail	pass	fail	fail	pass	fail	warn	pass	pass
FD01872854.comp.trim.for.paired	FD01872854.comp.trim.for.paired	Combined	Conventional base calls	Sanger / Illumina 1.9	2786966	0	0-242	49	61.1308	224.315	pass	pass	fail	pass	fail	fail	pass	fail	warn	pass	pass
FD01872858.comp.rev.paired	FD01872858.comp.rev.paired	Combined	Conventional base calls	Sanger / Illumina 1.9	2847076	0	0-242	50	63.295	222.439	pass	pass	fail	pass	fail	fail	pass	fail	warn	pass	pass
FD01872858.comp.trim.for.paired	FD01872858.comp.trim.for.paired	Combined	Conventional base calls	Sanger / Illumina 1.9	2847076	0	0-242	50	60.9197	220.78	pass	pass	fail	pass	fail	fail	pass	fail	warn	warn	pass
FD01872860.comp.rev.paired	FD01872860.comp.rev.paired	Combined	Conventional base calls	Sanger / Illumina 1.9	2333271	0	0-242	49	67.1641	217.329	pass	pass	fail	pass	fail	fail	pass	fail	warn	pass	pass
FD01872860.comp.trim.for.paired	FD01872860.comp.trim.for.paired	Combined	Conventional base calls	Sanger / Illumina 1.9	2333271	0	0-242	50	68.3266	217.386	pass	pass	fail	pass	fail	fail	pass	fail	warn	pass	pass
FD01872861.comp.rev.paired	FD01872861.comp.rev.paired	Combined	Conventional base calls	Sanger / Illumina 1.9	2946083	0	0-242	50	64.1242	222.536	pass	pass	fail	pass	fail	fail	pass	fail	warn	pass	pass
FD01872861.comp.trim.for.paired	FD01872861.comp.trim.for.paired	Combined	Conventional base calls	Sanger / Illumina 1.9	2946083	0	0-242	50	61.7295	221.21	pass	pass	fail	pass	fail	fail	pass	fail	warn	warn	pass
FD01872862.comp.rev.paired	FD01872862.comp.rev.paired	Combined	Conventional base calls	Sanger / Illumina 1.9	3020601	0	0-242	49	58.4663	223.011	pass	pass	fail	pass	fail	warn	pass	fail	warn	pass	pass
FD01872862.comp.trim.for.paired	FD01872862.comp.trim.for.paired	Combined	Conventional base calls	Sanger / Illumina 1.9	3020601	0	0-242	49	56.0605	221.398	pass	pass	fail	pass	fail	fail	pass	fail	warn	warn	pass
FD01872866.comp.rev.paired	FD01872866.comp.rev.paired	Combined	Conventional base calls	Sanger / Illumina 1.9	3309096	0	0-242	49	60.549	213.221	pass	pass	fail	pass	fail	fail	pass	fail	warn	pass	pass
FD01872866.comp.trim.for.paired	FD01872866.comp.trim.for.paired	Combined	Conventional base calls	Sanger / Illumina 1.9	3309096	0	0-242	49	57.94	212.939	pass	pass	fail	pass	fail	fail	pass	fail	warn	pass	pass
FD01872867.comp.rev.paired	FD01872867.comp.rev.paired	Combined	Conventional base calls	Sanger / Illumina 1.9	2700600	0	0-242	49	63.4782	220.346	pass	pass	fail	pass	fail	fail	pass	fail	warn	pass	pass
FD01872867.comp.trim.for.paired	FD01872867.comp.trim.for.paired	Combined	Conventional base calls	Sanger / Illumina 1.9	2700600	0	0-242	49	60.8908	219.033	pass	pass	fail	pass	fail	fail	pass	fail	warn	warn	pass
FD01872868.comp.rev.paired	FD01872868.comp.rev.paired	Combined	Conventional base calls	Sanger / Illumina 1.9	2542401	0	0-242	50	67.0518	218.43	pass	pass	fail	pass	fail	fail	pass	fail	warn	pass	pass
FD01872868.comp.trim.for.paired	FD01872868.comp.trim.for.paired	Combined	Conventional base calls	Sanger / Illumina 1.9	2542401	0	0-242	50	64.7739	217.352	pass	pass	fail	pass	fail	fail	pass	fail	warn	warn	pass
FD01872869.comp.rev.paired	FD01872869.comp.rev.paired	Combined	Conventional base calls	Sanger / Illumina 1.9	2955989	0	0-242	49	64.74	217.656	pass	pass	fail	pass	fail	fail	pass	fail	warn	pass	pass
FD01872869.comp.trim.for.paired	FD01872869.comp.trim.for.paired	Combined	Conventional base calls	Sanger / Illumina 1.9	2955989	0	0-242	49	62.8502	215.057	pass	pass	fail	pass	fail	fail	pass	fail	warn	warn	pass
FD01872870.comp.rev.paired	FD01872870.comp.rev.paired	Combined	Conventional base calls	Sanger / Illumina 1.9	2101457	0	0-242	50	69.535	217.67	pass	pass	fail	pass	fail	fail	pass	fail	warn	pass	pass
FD01872870.comp.trim.for.paired	FD01872870.comp.trim.for.paired	Combined	Conventional base calls	Sanger / Illumina 1.9	2101457	0	0-242	50	67.8893	217.12	pass	pass	fail	pass	fail	fail	pass	fail	warn	pass	pass
FD01872874.comp.rev.paired	FD01872874.comp.rev.paired	Combined	Conventional base calls	Sanger / Illumina 1.9	3060564	0	0-242	50	61.7253	217.436	pass	pass	fail	pass	fail	fail	pass	fail	warn	pass	pass
FD01872874.comp.trim.for.paired	FD01872874.comp.trim.for.paired	Combined	Conventional base calls	Sanger / Illumina 1.9	3060564	0	0-242	50	59.3197	214.7	pass	pass	fail	pass	fail	fail	pass	fail	warn	warn	pass
FD01872875.comp.rev.paired	FD01872875.comp.rev.paired	Combined	Conventional base calls	Sanger / Illumina 1.9	2476895	0	0-242	49	64.5011	215.434	pass	pass	fail	pass	fail	fail	pass	fail	warn	pass	pass
FD01872875.comp.trim.for.paired	FD01872875.comp.trim.for.paired	Combined	Conventional base calls	Sanger / Illumina 1.9	2476895	0	0-242	49	62.0653	215.47	pass	pass	fail	pass	fail	fail	pass	fail	warn	pass	pass
FD01872876.comp.rev.paired	FD01872876.comp.rev.paired	Combined	Conventional base calls	Sanger / Illumina 1.9	2268449	0	0-242	49	66.3859	215.91	pass	pass	fail	pass	fail	fail	pass	fail	warn	pass	pass
FD01872876.comp.trim.for.paired	FD01872876.comp.trim.for.paired	Combined	Conventional base calls	Sanger / Illumina 1.9	2268449	0	0-242	49	64.7503	214.095	pass	pass	fail	pass	fail	fail	pass	fail	warn	warn	pass
FD01872877.comp.rev.paired	FD01872877.comp.rev.paired	Combined	Conventional base calls	Sanger / Illumina 1.9	2452793	0	0-242	49	66.773	219.403	pass	pass	fail	pass	fail	fail	pass	fail	warn	pass	pass
FD01872877.comp.trim.for.paired	FD01872877.comp.trim.for.paired	Combined	Conventional base calls	Sanger / Illumina 1.9	2452793	0	0-242	50	66.2032	219.577	pass	pass	fail	pass	fail	fail	pass	fail	warn	pass	pass
FD01872878.comp.rev.paired	FD01872878.comp.rev.paired	Combined	Conventional base calls	Sanger / Illumina 1.9	2656393	0	0-242	49	65.1638	222.282	pass	pass	fail	pass	fail	fail	pass	fail	warn	pass	pass
FD01872878.comp.trim.for.paired	FD01872878.comp.trim.for.paired	Combined	Conventional base calls	Sanger / Illumina 1.9	2656393	0	0-242	49	63.7747	221.654	pass	pass	fail	pass	fail	fail	pass	fail	warn	pass	pass
FD01872882.comp.rev.paired	FD01872882.comp.rev.paired	Combined	Conventional base calls	Sanger / Illumina 1.9	2611367	0	0-242	49	64.0039	215.158	pass	pass	fail	pass	fail	fail	pass	fail	warn	pass	pass
FD01872882.comp.trim.for.paired	FD01872882.comp.trim.for.paired	Combined	Conventional base calls	Sanger / Illumina 1.9	2611367	0	0-242	50	62.7446	215.078	pass	pass	fail	pass	fail	fail	pass	fail	warn	pass	pass
FD01872883.comp.rev.paired	FD01872883.comp.rev.paired	Combined	Conventional base calls	Sanger / Illumina 1.9	2891709	0	0-242	50	63.5536	223.947	pass	pass	fail	pass	fail	fail	pass	fail	warn	pass	pass
FD01872883.comp.trim.for.paired	FD01872883.comp.trim.for.paired	Combined	Conventional base calls	Sanger / Illumina 1.9	2891709	0	0-242	50	61.539	222.35	pass	pass	fail	pass	fail	fail	pass	fail	warn	warn	pass
FD01872884.comp.rev.paired	FD01872884.comp.rev.paired	Combined	Conventional base calls	Sanger / Illumina 1.9	2937926	0	0-242	49	62.2065	221.018	pass	pass	fail	pass	fail	fail	pass	fail	warn	pass	pass
FD01872884.comp.trim.for.paired	FD01872884.comp.trim.for.paired	Combined	Conventional base calls	Sanger / Illumina 1.9	2937926	0	0-242	50	59.4922	219.601	pass	pass	fail	pass	fail	fail	pass	fail	warn	warn	pass
FD01872886.comp.rev.paired	FD01872886.comp.rev.paired	Combined	Conventional base calls	Sanger / Illumina 1.9	2229885	0	0-242	47	63.1392	221.679	pass	pass	fail	pass	fail	fail	pass	fail	warn	pass	pass
FD01872886.comp.trim.for.paired	FD01872886.comp.trim.for.paired	Combined	Conventional base calls	Sanger / Illumina 1.9	2229885	0	0-242	48	61.846	221.098	pass	pass	fail	pass	fail	fail	pass	fail	warn	pass	pass
FD01872890.comp.rev.paired	FD01872890.comp.rev.paired	Combined	Conventional base calls	Sanger / Illumina 1.9	2508267	0	0-242	50	65.541	220.457	pass	pass	fail	pass	fail	fail	pass	fail	warn	pass	pass
FD01872890.comp.trim.for.paired	FD01872890.comp.trim.for.paired	Combined	Conventional base calls	Sanger / Illumina 1.9	2508267	0	0-242	50	63.6381	218.921	pass	pass	fail	pass	fail	fail	pass	fail	warn	pass	pass
FD01872891.comp.rev.paired	FD01872891.comp.rev.paired	Combined	Conventional base calls	Sanger / Illumina 1.9	2567189	0	0-242	50	64.1047	220.129	pass	pass	fail	pass	fail	fail	pass	fail	warn	pass	pass
FD01872891.comp.trim.for.paired	FD01872891.comp.trim.for.paired	Combined	Conventional base calls	Sanger / Illumina 1.9	2567189	0	0-242	50	62.0164	219.355	pass	pass	fail	pass	fail	fail	pass	fail	warn	pass	pass
FD01872892.comp.rev.paired	FD01872892.comp.rev.paired	Combined	Conventional base calls	Sanger / Illumina 1.9	2974465	0	0-242	49	63.2211	220.314	pass	pass	fail	pass	fail	fail	pass	fail	warn	pass	pass
FD01872892.comp.trim.for.paired	FD01872892.comp.trim.for.paired	Combined	Conventional base calls	Sanger / Illumina 1.9	2974465	0	0-242	49	60.6304	219.321	pass	pass	fail	pass	fail	fail	pass	fail	warn	pass	pass
FD01872897.comp.rev.paired	FD01872897.comp.rev.paired	Combined	Conventional base calls	Sanger / Illumina 1.9	2746427	0	0-242	50	62.8351	218.724	pass	pass	fail	pass	fail	fail	pass	fail	warn	pass	pass
FD01872897.comp.trim.for.paired	FD01872897.comp.trim.for.paired	Combined	Conventional base calls	Sanger / Illumina 1.9	2746427	0	0-242	50	60.501	217.867	pass	pass	fail	pass	fail	fail	pass	fail	warn	pass	pass
FD01872898.comp.rev.paired	FD01872898.comp.rev.paired	Combined	Conventional base calls	Sanger / Illumina 1.9	2730340	0	0-242	49	62.345	216.568	pass	pass	fail	pass	fail	fail	pass	fail	warn	pass	pass
FD01872898.comp.trim.for.paired	FD01872898.comp.trim.for.paired	Combined	Conventional base calls	Sanger / Illumina 1.9	2730340	0	0-242	49	61.4714	216.669	pass	pass	fail	pass	fail	fail	pass	fail	warn	pass	pass
FD01872899.comp.rev.paired	FD01872899.comp.rev.paired	Combined	Conventional base calls	Sanger / Illumina 1.9	2990876	0	0-242	50	63.9305	220.793	pass	pass	fail	pass	warn	fail	pass	fail	warn	pass	pass
FD01872899.comp.trim.for.paired	FD01872899.comp.trim.for.paired	Combined	Conventional base calls	Sanger / Illumina 1.9	2990876	0	0-242	50	61.6817	221.088	pass	pass	fail	pass	fail	fail	pass	fail	warn	pass	pass
FD01872900.comp.rev.paired	FD01872900.comp.rev.paired	Combined	Conventional base calls	Sanger / Illumina 1.9	2343379	0	0-242	50	70.541	221.42	pass	pass	fail	pass	fail	fail	pass	fail	pass	pass	pass
FD01872900.comp.trim.for.paired	FD01872900.comp.trim.for.paired	Combined	Conventional base calls	Sanger / Illumina 1.9	2343379	0	0-242	50	69.307	220.827	pass	pass	fail	pass	fail	fail	pass	fail	warn	pass	pass
FD01872901.comp.rev.paired	FD01872901.comp.rev.paired	Combined	Conventional base calls	Sanger / Illumina 1.9	2621116	0	0-242	49	64.6387	219.321	pass	pass	fail	pass	fail	fail	pass	fail	warn	pass	pass
FD01872901.comp.trim.for.paired	FD01872901.comp.trim.for.paired	Combined	Conventional base calls	Sanger / Illumina 1.9	2621116	0	0-242	49	62.0695	218.485	pass	pass	fail	pass	fail	fail	pass	fail	warn	pass	pass
FD01872902.comp.rev.paired	FD01872902.comp.rev.paired	Combined	Conventional base calls	Sanger / Illumina 1.9	2516646	0	0-242	51	62.1499	217.243	pass	pass	fail	pass	fail	fail	pass	fail	warn	pass	pass
FD01872902.comp.trim.for.paired	FD01872902.comp.trim.for.paired	Combined	Conventional base calls	Sanger / Illumina 1.9	2516646	0	0-242	51	60.2342	215.887	pass	pass	fail	pass	fail	fail	pass	fail	warn	warn	pass
FD01872903.comp.rev.paired	FD01872903.comp.rev.paired	Combined	Conventional base calls	Sanger / Illumina 1.9	2938941	0	0-242	51	60.6765	212.424	pass	pass	fail	pass	fail	fail	pass	fail	warn	pass	pass
FD01872903.comp.trim.for.paired	FD01872903.comp.trim.for.paired	Combined	Conventional base calls	Sanger / Illumina 1.9	2938941	0	0-242	51	57.6998	208.499	pass	pass	fail	pass	fail	fail	pass	fail	warn	warn	pass
FD01872906.comp.rev.paired	FD01872906.comp.rev.paired	Combined	Conventional base calls	Sanger / Illumina 1.9	3242129	0	0-242	50	62.1154	220.729	pass	pass	fail	pass	fail	fail	pass	fail	warn	pass	pass
FD01872906.comp.trim.for.paired	FD01872906.comp.trim.for.paired	Combined	Conventional base calls	Sanger / Illumina 1.9	3242129	0	0-242	50	59.6948	220.82	pass	pass	fail	pass	fail	fail	pass	fail	warn	pass	pass
FD01872907.comp.rev.paired	FD01872907.comp.rev.paired	Combined	Conventional base calls	Sanger / Illumina 1.9	2853797	0	0-242	50	65.9184	216.115	pass	pass	fail	pass	warn	fail	pass	fail	warn	pass	pass
FD01872907.comp.trim.for.paired	FD01872907.comp.trim.for.paired	Combined	Conventional base calls	Sanger / Illumina 1.9	2853797	0	0-242	50	63.6272	214.039	pass	pass	fail	pass	warn	fail	pass	fail	warn	warn	pass
FD01872908.comp.rev.paired	FD01872908.comp.rev.paired	Combined	Conventional base calls	Sanger / Illumina 1.9	2683438	0	0-242	49	65.9256	220.406	pass	pass	fail	pass	fail	fail	pass	fail	warn	pass	pass
FD01872908.comp.trim.for.paired	FD01872908.comp.trim.for.paired	Combined	Conventional base calls	Sanger / Illumina 1.9	2683438	0	0-242	49	63.7403	219.359	pass	pass	fail	pass	fail	fail	pass	fail	warn	pass	pass
FD01872914.comp.rev.paired	FD01872914.comp.rev.paired	Combined	Conventional base calls	Sanger / Illumina 1.9	2754822	0	0-242	49	64.4869	215.291	pass	pass	fail	pass	fail	fail	pass	fail	warn	pass	pass
FD01872914.comp.trim.for.paired	FD01872914.comp.trim.for.paired	Combined	Conventional base calls	Sanger / Illumina 1.9	2754822	0	0-242	49	62.2816	213.169	pass	pass	fail	pass	fail	fail	pass	fail	warn	warn	pass
FD01872915.comp.rev.paired	FD01872915.comp.rev.paired	Combined	Conventional base calls	Sanger / Illumina 1.9	2989236	0	0-242	50	63.5358	218.616	pass	pass	fail	pass	fail	fail	pass	fail	warn	pass	pass
FD01872915.comp.trim.for.paired	FD01872915.comp.trim.for.paired	Combined	Conventional base calls	Sanger / Illumina 1.9	2989236	0	0-242	50	60.8369	217.921	pass	pass	fail	pass	fail	fail	pass	fail	warn	pass	pass
FD01872916.comp.rev.paired	FD01872916.comp.rev.paired	Combined	Conventional base calls	Sanger / Illumina 1.9	2288845	0	0-242	49	66.3442	218.63	pass	pass	fail	pass	warn	fail	pass	fail	warn	pass	pass
FD01872916.comp.trim.for.paired	FD01872916.comp.trim.for.paired	Combined	Conventional base calls	Sanger / Illumina 1.9	2288845	0	0-242	49	64.0133	217.741	pass	pass	fail	pass	fail	fail	pass	fail	warn	pass	pass
FD01872917.comp.rev.paired	FD01872917.comp.rev.paired	Combined	Conventional base calls	Sanger / Illumina 1.9	2778147	0	0-242	50	64.3956	217.963	pass	pass	fail	pass	fail	fail	pass	fail	warn	pass	pass
FD01872917.comp.trim.for.paired	FD01872917.comp.trim.for.paired	Combined	Conventional base calls	Sanger / Illumina 1.9	2778147	0	0-242	50	61.6362	218.264	pass	pass	fail	pass	fail	fail	pass	fail	warn	pass	pass
FD01872918.comp.rev.paired	FD01872918.comp.rev.paired	Combined	Conventional base calls	Sanger / Illumina 1.9	3426964	0	0-242	51	57.3079	218.25	pass	pass	fail	pass	fail	fail	pass	fail	warn	pass	pass
FD01872918.comp.trim.for.paired	FD01872918.comp.trim.for.paired	Combined	Conventional base calls	Sanger / Illumina 1.9	3426964	0	0-242	51	54.0827	215.24	pass	pass	fail	pass	fail	fail	pass	fail	warn	warn	pass
FD01872922.comp.rev.paired	FD01872922.comp.rev.paired	Combined	Conventional base calls	Sanger / Illumina 1.9	2316954	0	0-242	50	68.6424	222.319	pass	pass	fail	pass	fail	fail	pass	fail	warn	pass	pass
FD01872922.comp.trim.for.paired	FD01872922.comp.trim.for.paired	Combined	Conventional base calls	Sanger / Illumina 1.9	2316954	0	0-242	50	66.5588	221.368	pass	pass	fail	pass	fail	fail	pass	fail	warn	pass	pass
FD01872923.comp.rev.paired	FD01872923.comp.rev.paired	Combined	Conventional base calls	Sanger / Illumina 1.9	2304001	0	0-242	50	66.7527	219.673	pass	pass	fail	pass	fail	fail	pass	fail	warn	pass	pass
FD01872923.comp.trim.for.paired	FD01872923.comp.trim.for.paired	Combined	Conventional base calls	Sanger / Illumina 1.9	2304001	0	0-242	50	66.8351	219.242	pass	pass	fail	pass	fail	fail	pass	fail	warn	pass	pass
FD01872924.comp.rev.paired	FD01872924.comp.rev.paired	Combined	Conventional base calls	Sanger / Illumina 1.9	2621066	0	0-242	49	64.2892	218.781	pass	pass	fail	pass	fail	fail	pass	fail	warn	pass	pass
FD01872924.comp.trim.for.paired	FD01872924.comp.trim.for.paired	Combined	Conventional base calls	Sanger / Illumina 1.9	2621066	0	0-242	49	63.0124	217.427	pass	pass	fail	pass	fail	fail	pass	fail	warn	warn	pass
FD01872925.comp.rev.paired	FD01872925.comp.rev.paired	Combined	Conventional base calls	Sanger / Illumina 1.9	3088380	0	0-242	50	62.2409	221.828	pass	pass	fail	pass	fail	fail	pass	fail	warn	pass	pass
FD01872925.comp.trim.for.paired	FD01872925.comp.trim.for.paired	Combined	Conventional base calls	Sanger / Illumina 1.9	3088380	0	0-242	50	59.4247	220.404	pass	pass	fail	pass	fail	fail	pass	fail	warn	warn	pass
FD01872926.comp.rev.paired	FD01872926.comp.rev.paired	Combined	Conventional base calls	Sanger / Illumina 1.9	2508249	0	0-242	50	62.8079	217.51	pass	pass	fail	pass	fail	fail	pass	fail	warn	pass	pass
FD01872926.comp.trim.for.paired	FD01872926.comp.trim.for.paired	Combined	Conventional base calls	Sanger / Illumina 1.9	2508249	0	0-242	50	58.4271	216.486	pass	pass	fail	pass	fail	fail	pass	fail	warn	warn	pass
FD01872929.comp.rev.paired	FD01872929.comp.rev.paired	Combined	Conventional base calls	Sanger / Illumina 1.9	2812206	0	0-242	49	63.5805	219.283	pass	pass	fail	pass	fail	fail	pass	fail	warn	pass	pass
FD01872929.comp.trim.for.paired	FD01872929.comp.trim.for.paired	Combined	Conventional base calls	Sanger / Illumina 1.9	2812206	0	0-242	50	61.0927	218.348	pass	pass	fail	pass	fail	fail	pass	fail	warn	pass	pass
FD01872930.comp.rev.paired	FD01872930.comp.rev.paired	Combined	Conventional base calls	Sanger / Illumina 1.9	799027	0	0-242	49	80.1945	189.519	pass	pass	fail	pass	warn	fail	pass	fail	pass	pass	pass
FD01872930.comp.trim.for.paired	FD01872930.comp.trim.for.paired	Combined	Conventional base calls	Sanger / Illumina 1.9	799027	0	0-242	49	79.065	189.435	pass	pass	fail	pass	warn	fail	pass	fail	pass	pass	pass
FD01872931.comp.rev.paired	FD01872931.comp.rev.paired	Combined	Conventional base calls	Sanger / Illumina 1.9	2373236	0	0-242	49	66.0083	221.118	pass	pass	fail	pass	fail	fail	pass	fail	warn	pass	pass
FD01872931.comp.trim.for.paired	FD01872931.comp.trim.for.paired	Combined	Conventional base calls	Sanger / Illumina 1.9	2373236	0	0-242	49	65.8397	220.871	pass	pass	fail	pass	fail	fail	pass	fail	warn	pass	pass
FD01872933.comp.rev.paired	FD01872933.comp.rev.paired	Combined	Conventional base calls	Sanger / Illumina 1.9	2793623	0	0-242	50	64.1672	219.792	pass	pass	fail	pass	fail	fail	pass	fail	warn	pass	pass
FD01872933.comp.trim.for.paired	FD01872933.comp.trim.for.paired	Combined	Conventional base calls	Sanger / Illumina 1.9	2793623	0	0-242	50	61.5441	217.669	pass	pass	fail	pass	fail	fail	pass	fail	warn	warn	pass
FD01872935.comp.rev.paired	FD01872935.comp.rev.paired	Combined	Conventional base calls	Sanger / Illumina 1.9	2488243	0	0-242	51	63.0735	217.205	pass	pass	fail	pass	fail	fail	pass	fail	warn	pass	pass
FD01872935.comp.trim.for.paired	FD01872935.comp.trim.for.paired	Combined	Conventional base calls	Sanger / Illumina 1.9	2488243	0	0-242	51	61.689	217.33	pass	pass	fail	pass	fail	fail	pass	fail	warn	pass	pass
FD01872938.comp.rev.paired	FD01872938.comp.rev.paired	Combined	Conventional base calls	Sanger / Illumina 1.9	2498630	0	0-242	50	67.6144	218.095	pass	pass	fail	pass	fail	fail	pass	fail	warn	pass	pass
FD01872938.comp.trim.for.paired	FD01872938.comp.trim.for.paired	Combined	Conventional base calls	Sanger / Illumina 1.9	2498630	0	0-242	50	66.1596	217.86	pass	pass	fail	pass	fail	fail	pass	fail	warn	pass	pass
FD01872939.comp.rev.paired	FD01872939.comp.rev.paired	Combined	Conventional base calls	Sanger / Illumina 1.9	2309994	0	0-242	49	66.8401	215.559	pass	pass	fail	pass	fail	fail	pass	fail	warn	pass	pass
FD01872939.comp.trim.for.paired	FD01872939.comp.trim.for.paired	Combined	Conventional base calls	Sanger / Illumina 1.9	2309994	0	0-242	49	65.4445	215.731	pass	pass	fail	pass	fail	fail	pass	fail	warn	pass	pass
FD01872941.comp.rev.paired	FD01872941.comp.rev.paired	Combined	Conventional base calls	Sanger / Illumina 1.9	2549335	0	0-242	49	64.0093	216.152	pass	pass	fail	pass	fail	fail	pass	fail	warn	pass	pass
FD01872941.comp.trim.for.paired	FD01872941.comp.trim.for.paired	Combined	Conventional base calls	Sanger / Illumina 1.9	2549335	0	0-242	50	62.4595	215.795	pass	pass	fail	pass	fail	fail	pass	fail	warn	pass	pass
FD01872942.comp.rev.paired	FD01872942.comp.rev.paired	Combined	Conventional base calls	Sanger / Illumina 1.9	2578785	0	0-242	50	61.124	224.851	pass	pass	fail	pass	fail	fail	pass	fail	warn	pass	pass
FD01872942.comp.trim.for.paired	FD01872942.comp.trim.for.paired	Combined	Conventional base calls	Sanger / Illumina 1.9	2578785	0	0-242	51	57.9138	224.857	pass	pass	fail	pass	fail	fail	pass	fail	warn	pass	pass
FD01874589.comp.rev.paired	FD01874589.comp.rev.paired	Combined	Conventional base calls	Sanger / Illumina 1.9	3933300	0	0-242	51	58.0861	212.18	pass	pass	fail	pass	fail	fail	pass	fail	warn	pass	pass
FD01874589.comp.trim.for.paired	FD01874589.comp.trim.for.paired	Combined	Conventional base calls	Sanger / Illumina 1.9	3933300	0	0-242	51	57.9388	208.337	pass	pass	fail	pass	fail	fail	pass	fail	warn	warn	pass
FD01874605.comp.rev.paired	FD01874605.comp.rev.paired	Combined	Conventional base calls	Sanger / Illumina 1.9	596683	0	0-242	50	83.1282	147.91	pass	pass	fail	pass	warn	warn	pass	fail	pass	pass	pass
FD01874605.comp.trim.for.paired	FD01874605.comp.trim.for.paired	Combined	Conventional base calls	Sanger / Illumina 1.9	596683	0	0-242	50	82.3207	148.1	pass	pass	fail	pass	warn	warn	pass	fail	pass	pass	pass
FD01874613.comp.rev.paired	FD01874613.comp.rev.paired	Combined	Conventional base calls	Sanger / Illumina 1.9	1233458	0	0-242	55	72.59	163.902	pass	pass	fail	pass	fail	warn	pass	fail	pass	pass	pass
FD01874613.comp.trim.for.paired	FD01874613.comp.trim.for.paired	Combined	Conventional base calls	Sanger / Illumina 1.9	1233458	0	0-242	55	71.8073	147.528	pass	pass	fail	pass	fail	fail	pass	fail	pass	fail	pass
FD01874634.comp.rev.paired	FD01874634.comp.rev.paired	Combined	Conventional base calls	Sanger / Illumina 1.9	3323172	0	0-242	51	55.412	221.825	pass	pass	fail	pass	fail	fail	pass	fail	warn	pass	pass
FD01874634.comp.trim.for.paired	FD01874634.comp.trim.for.paired	Combined	Conventional base calls	Sanger / Illumina 1.9	3323172	0	0-242	51	55.6137	220.954	pass	pass	fail	pass	fail	fail	pass	fail	warn	pass	pass
FD01874637.comp.rev.paired	FD01874637.comp.rev.paired	Combined	Conventional base calls	Sanger / Illumina 1.9	2976805	0	0-242	50	63.6432	223.426	pass	pass	fail	pass	fail	fail	pass	fail	warn	pass	pass
FD01874637.comp.trim.for.paired	FD01874637.comp.trim.for.paired	Combined	Conventional base calls	Sanger / Illumina 1.9	2976805	0	0-242	50	63.1543	222.855	pass	pass	fail	pass	fail	fail	pass	fail	warn	pass	pass
FD01874638.comp.rev.paired	FD01874638.comp.rev.paired	Combined	Conventional base calls	Sanger / Illumina 1.9	3688156	0	0-242	50	55.3037	222.224	pass	pass	fail	pass	fail	fail	pass	fail	warn	pass	pass
FD01874638.comp.trim.for.paired	FD01874638.comp.trim.for.paired	Combined	Conventional base calls	Sanger / Illumina 1.9	3688156	0	0-242	51	55.5545	219.729	pass	pass	fail	pass	fail	fail	pass	fail	warn	warn	pass
FD01874640.comp.rev.paired	FD01874640.comp.rev.paired	Combined	Conventional base calls	Sanger / Illumina 1.9	3971464	0	0-242	51	51.3097	209.578	pass	pass	fail	pass	fail	fail	pass	fail	warn	pass	pass
FD01874640.comp.trim.for.paired	FD01874640.comp.trim.for.paired	Combined	Conventional base calls	Sanger / Illumina 1.9	3971464	0	0-242	51	52.3044	204.089	pass	pass	fail	pass	fail	fail	pass	fail	warn	warn	pass
FD01874641.comp.rev.paired	FD01874641.comp.rev.paired	Combined	Conventional base calls	Sanger / Illumina 1.9	2320152	0	0-242	51	62.5527	199.495	pass	pass	fail	pass	warn	fail	pass	fail	warn	pass	pass
FD01874641.comp.trim.for.paired	FD01874641.comp.trim.for.paired	Combined	Conventional base calls	Sanger / Illumina 1.9	2320152	0	0-242	51	63.9121	190.842	pass	pass	fail	pass	warn	fail	pass	fail	warn	warn	pass
FD01874643.comp.rev.paired	FD01874643.comp.rev.paired	Combined	Conventional base calls	Sanger / Illumina 1.9	4342377	0	0-242	51	54.0485	176.334	pass	pass	fail	pass	warn	warn	pass	fail	warn	pass	pass
FD01874643.comp.trim.for.paired	FD01874643.comp.trim.for.paired	Combined	Conventional base calls	Sanger / Illumina 1.9	4342377	0	0-242	51	56.1488	154.01	pass	pass	fail	pass	warn	fail	pass	fail	warn	warn	pass
FD01874645.comp.rev.paired	FD01874645.comp.rev.paired	Combined	Conventional base calls	Sanger / Illumina 1.9	4113216	0	0-242	50	56.8512	173.263	pass	pass	fail	pass	fail	warn	pass	fail	warn	pass	pass
FD01874645.comp.trim.for.paired	FD01874645.comp.trim.for.paired	Combined	Conventional base calls	Sanger / Illumina 1.9	4113216	0	0-242	50	57.6957	154.545	pass	pass	fail	pass	fail	fail	pass	fail	warn	warn	pass
FD01874666.comp.rev.paired	FD01874666.comp.rev.paired	Combined	Conventional base calls	Sanger / Illumina 1.9	4038007	0	0-242	51	51.6947	223.461	pass	pass	fail	pass	fail	fail	pass	fail	warn	pass	pass
FD01874666.comp.trim.for.paired	FD01874666.comp.trim.for.paired	Combined	Conventional base calls	Sanger / Illumina 1.9	4038007	0	0-242	51	50.7262	221.384	pass	pass	fail	pass	fail	fail	pass	fail	warn	warn	pass
FD01874670.comp.rev.paired	FD01874670.comp.rev.paired	Combined	Conventional base calls	Sanger / Illumina 1.9	4975117	0	0-242	51	50.9988	205.958	pass	pass	fail	pass	fail	warn	pass	fail	warn	pass	pass
FD01874670.comp.trim.for.paired	FD01874670.comp.trim.for.paired	Combined	Conventional base calls	Sanger / Illumina 1.9	4975117	0	0-242	51	53.452	203.131	pass	pass	fail	pass	warn	fail	pass	fail	warn	warn	pass
FD01876599.comp.rev.paired	FD01876599.comp.rev.paired	Combined	Conventional base calls	Sanger / Illumina 1.9	3300860	0	0-242	51	61.2567	217.48	pass	pass	fail	pass	fail	fail	pass	fail	warn	pass	pass
FD01876599.comp.trim.for.paired	FD01876599.comp.trim.for.paired	Combined	Conventional base calls	Sanger / Illumina 1.9	3300860	0	0-242	51	59.3441	212.81	pass	pass	fail	pass	fail	fail	pass	fail	warn	warn	pass
FD01876603.comp.rev.paired	FD01876603.comp.rev.paired	Combined	Conventional base calls	Sanger / Illumina 1.9	3491815	0	0-242	51	61.0289	208.608	pass	pass	fail	pass	fail	warn	pass	fail	warn	pass	pass
FD01876603.comp.trim.for.paired	FD01876603.comp.trim.for.paired	Combined	Conventional base calls	Sanger / Illumina 1.9	3491815	0	0-242	51	59.8608	201.078	pass	pass	fail	pass	fail	fail	pass	fail	warn	warn	pass
FD01876606.comp.rev.paired	FD01876606.comp.rev.paired	Combined	Conventional base calls	Sanger / Illumina 1.9	2768465	0	0-242	51	64.8759	231.679	pass	pass	fail	pass	fail	fail	pass	fail	warn	pass	pass
FD01876606.comp.trim.for.paired	FD01876606.comp.trim.for.paired	Combined	Conventional base calls	Sanger / Illumina 1.9	2768465	0	0-242	51	63.2088	231.302	pass	pass	fail	pass	fail	fail	pass	fail	warn	pass	pass
FD01876613.comp.rev.paired	FD01876613.comp.rev.paired	Combined	Conventional base calls	Sanger / Illumina 1.9	1753203	0	0-242	51	69.6253	162.938	pass	pass	fail	pass	warn	warn	pass	fail	warn	pass	pass
FD01876613.comp.trim.for.paired	FD01876613.comp.trim.for.paired	Combined	Conventional base calls	Sanger / Illumina 1.9	1753203	0	0-242	51	72.2344	142.178	pass	pass	fail	pass	warn	fail	pass	fail	pass	warn	pass
FD01876614.comp.rev.paired	FD01876614.comp.rev.paired	Combined	Conventional base calls	Sanger / Illumina 1.9	328888	0	0-242	50	86.0546	140.073	pass	pass	fail	pass	fail	warn	pass	fail	pass	pass	pass
FD01876614.comp.trim.for.paired	FD01876614.comp.trim.for.paired	Combined	Conventional base calls	Sanger / Illumina 1.9	328888	0	0-242	50	84.459	140.91	pass	pass	fail	pass	fail	warn	pass	fail	pass	pass	pass
FD01876615.comp.rev.paired	FD01876615.comp.rev.paired	Combined	Conventional base calls	Sanger / Illumina 1.9	2585894	0	0-242	51	63.7979	223.366	pass	pass	fail	pass	fail	fail	pass	fail	warn	pass	pass
FD01876615.comp.trim.for.paired	FD01876615.comp.trim.for.paired	Combined	Conventional base calls	Sanger / Illumina 1.9	2585894	0	0-242	51	61.4842	221.88	pass	pass	fail	pass	fail	fail	pass	fail	warn	warn	pass
FD01876616.comp.rev.paired	FD01876616.comp.rev.paired	Combined	Conventional base calls	Sanger / Illumina 1.9	1537027	0	0-242	48	65.836	211.663	pass	pass	fail	pass	fail	fail	pass	fail	warn	pass	pass
FD01876616.comp.trim.for.paired	FD01876616.comp.trim.for.paired	Combined	Conventional base calls	Sanger / Illumina 1.9	1537027	0	0-242	49	68.783	212.644	pass	pass	fail	pass	warn	fail	pass	fail	warn	pass	pass
FD01876621.comp.rev.paired	FD01876621.comp.rev.paired	Combined	Conventional base calls	Sanger / Illumina 1.9	4910613	0	0-242	51	57.7857	211.719	pass	pass	fail	pass	fail	warn	pass	fail	warn	pass	pass
FD01876621.comp.trim.for.paired	FD01876621.comp.trim.for.paired	Combined	Conventional base calls	Sanger / Illumina 1.9	4910613	0	0-242	51	53.8353	203.951	pass	pass	fail	pass	fail	fail	pass	fail	warn	warn	pass
FD01876623.comp.rev.paired	FD01876623.comp.rev.paired	Combined	Conventional base calls	Sanger / Illumina 1.9	2751773	0	0-242	51	61.3661	226.356	pass	pass	fail	pass	fail	fail	pass	fail	warn	pass	pass
FD01876623.comp.trim.for.paired	FD01876623.comp.trim.for.paired	Combined	Conventional base calls	Sanger / Illumina 1.9	2751773	0	0-242	51	62.8015	225.514	pass	pass	fail	pass	fail	fail	pass	fail	warn	pass	pass
FD01876626.comp.rev.paired	FD01876626.comp.rev.paired	Combined	Conventional base calls	Sanger / Illumina 1.9	3063008	0	0-242	51	57.9277	217.875	pass	pass	fail	pass	fail	fail	pass	fail	warn	pass	pass
FD01876626.comp.trim.for.paired	FD01876626.comp.trim.for.paired	Combined	Conventional base calls	Sanger / Illumina 1.9	3063008	0	0-242	51	55.6466	217.998	pass	pass	fail	pass	fail	fail	pass	fail	warn	pass	pass
FD01876628.comp.rev.paired	FD01876628.comp.rev.paired	Combined	Conventional base calls	Sanger / Illumina 1.9	5854526	0	0-242	51	49.6293	195.78	pass	pass	fail	pass	fail	warn	pass	fail	fail	pass	pass
FD01876628.comp.trim.for.paired	FD01876628.comp.trim.for.paired	Combined	Conventional base calls	Sanger / Illumina 1.9	5854526	0	0-242	51	48.1044	194.976	pass	pass	fail	pass	fail	fail	pass	fail	fail	pass	pass
FD01876629.comp.rev.paired	FD01876629.comp.rev.paired	Combined	Conventional base calls	Sanger / Illumina 1.9	3329210	0	0-242	51	59.712	168.159	pass	pass	fail	pass	fail	warn	pass	fail	warn	pass	pass
FD01876629.comp.trim.for.paired	FD01876629.comp.trim.for.paired	Combined	Conventional base calls	Sanger / Illumina 1.9	3329210	0	0-242	51	58.0122	168.017	pass	pass	fail	pass	fail	warn	pass	fail	warn	pass	pass
FD01876630.comp.rev.paired	FD01876630.comp.rev.paired	Combined	Conventional base calls	Sanger / Illumina 1.9	3190311	0	0-242	51	59.8885	213.068	pass	pass	fail	pass	fail	fail	pass	fail	warn	pass	pass
FD01876630.comp.trim.for.paired	FD01876630.comp.trim.for.paired	Combined	Conventional base calls	Sanger / Illumina 1.9	3190311	0	0-242	51	58.8212	207.319	pass	pass	fail	pass	fail	fail	pass	fail	warn	warn	pass
FD01876631.comp.rev.paired	FD01876631.comp.rev.paired	Combined	Conventional base calls	Sanger / Illumina 1.9	2922123	0	0-242	51	61.1701	219.817	pass	pass	fail	pass	fail	fail	pass	fail	warn	pass	pass
FD01876631.comp.trim.for.paired	FD01876631.comp.trim.for.paired	Combined	Conventional base calls	Sanger / Illumina 1.9	2922123	0	0-242	51	61.2342	218.548	pass	pass	fail	pass	fail	fail	pass	fail	warn	pass	pass
FD01876632.comp.rev.paired	FD01876632.comp.rev.paired	Combined	Conventional base calls	Sanger / Illumina 1.9	2464379	0	0-242	51	60.3415	223.483	pass	pass	fail	pass	fail	fail	pass	fail	warn	pass	pass
FD01876632.comp.trim.for.paired	FD01876632.comp.trim.for.paired	Combined	Conventional base calls	Sanger / Illumina 1.9	2464379	0	0-242	51	61.3774	223.129	pass	pass	fail	pass	fail	fail	pass	fail	warn	pass	pass
FD01876633.comp.rev.paired	FD01876633.comp.rev.paired	Combined	Conventional base calls	Sanger / Illumina 1.9	3859214	0	0-242	51	58.8563	178.959	pass	pass	fail	pass	warn	warn	pass	fail	warn	pass	pass
FD01876633.comp.trim.for.paired	FD01876633.comp.trim.for.paired	Combined	Conventional base calls	Sanger / Illumina 1.9	3859214	0	0-242	51	58.2474	178.433	pass	pass	fail	pass	warn	warn	pass	fail	warn	pass	pass
FD01876637.comp.rev.paired	FD01876637.comp.rev.paired	Combined	Conventional base calls	Sanger / Illumina 1.9	4568314	0	0-242	51	55.7601	204.162	pass	pass	fail	pass	fail	warn	pass	fail	warn	pass	pass
FD01876637.comp.trim.for.paired	FD01876637.comp.trim.for.paired	Combined	Conventional base calls	Sanger / Illumina 1.9	4568314	0	0-242	51	54.5113	194.16	pass	pass	fail	pass	fail	fail	pass	fail	warn	warn	pass
FD01876638.comp.rev.paired	FD01876638.comp.rev.paired	Combined	Conventional base calls	Sanger / Illumina 1.9	2211078	0	0-242	51	65.2939	193.256	pass	pass	fail	pass	fail	warn	pass	fail	warn	pass	pass
FD01876638.comp.trim.for.paired	FD01876638.comp.trim.for.paired	Combined	Conventional base calls	Sanger / Illumina 1.9	2211078	0	0-242	51	68.6961	196.115	pass	pass	fail	pass	fail	warn	pass	fail	warn	pass	pass
FD01876639.comp.rev.paired	FD01876639.comp.rev.paired	Combined	Conventional base calls	Sanger / Illumina 1.9	3127439	0	0-242	51	59.4572	221.273	pass	pass	fail	pass	fail	fail	pass	fail	warn	pass	pass
FD01876639.comp.trim.for.paired	FD01876639.comp.trim.for.paired	Combined	Conventional base calls	Sanger / Illumina 1.9	3127439	0	0-242	51	58.2888	220.137	pass	pass	fail	pass	fail	fail	pass	fail	warn	pass	pass
FD01876640.comp.rev.paired	FD01876640.comp.rev.paired	Combined	Conventional base calls	Sanger / Illumina 1.9	6117083	0	0-242	50	51.9206	205.08	pass	pass	fail	pass	fail	warn	pass	fail	warn	pass	pass
FD01876640.comp.trim.for.paired	FD01876640.comp.trim.for.paired	Combined	Conventional base calls	Sanger / Illumina 1.9	6117083	0	0-242	51	49.5402	199.247	pass	pass	fail	pass	fail	fail	pass	fail	fail	warn	pass
FD01876642.comp.rev.paired	FD01876642.comp.rev.paired	Combined	Conventional base calls	Sanger / Illumina 1.9	3280601	0	0-242	51	60.1142	214.121	pass	pass	fail	pass	fail	fail	pass	fail	warn	pass	pass
FD01876642.comp.trim.for.paired	FD01876642.comp.trim.for.paired	Combined	Conventional base calls	Sanger / Illumina 1.9	3280601	0	0-242	51	57.4554	208.932	pass	pass	fail	pass	fail	fail	pass	fail	warn	warn	pass
FD01876643.comp.rev.paired	FD01876643.comp.rev.paired	Combined	Conventional base calls	Sanger / Illumina 1.9	3143800	0	0-242	51	59.6294	220.841	pass	pass	fail	pass	fail	fail	pass	fail	warn	pass	pass
FD01876643.comp.trim.for.paired	FD01876643.comp.trim.for.paired	Combined	Conventional base calls	Sanger / Illumina 1.9	3143800	0	0-242	51	56.6461	219.563	pass	pass	fail	pass	fail	fail	pass	fail	warn	warn	pass
FD01876644.comp.rev.paired	FD01876644.comp.rev.paired	Combined	Conventional base calls	Sanger / Illumina 1.9	2924555	0	0-242	51	60.2709	220.667	pass	pass	fail	pass	fail	fail	pass	fail	warn	pass	pass
FD01876644.comp.trim.for.paired	FD01876644.comp.trim.for.paired	Combined	Conventional base calls	Sanger / Illumina 1.9	2924555	0	0-242	51	58.4302	217.832	pass	pass	fail	pass	fail	fail	pass	fail	warn	warn	pass
FD01876648.comp.rev.paired	FD01876648.comp.rev.paired	Combined	Conventional base calls	Sanger / Illumina 1.9	3763972	0	0-242	51	55.7901	229.623	pass	pass	fail	pass	fail	fail	pass	fail	warn	pass	pass
FD01876648.comp.trim.for.paired	FD01876648.comp.trim.for.paired	Combined	Conventional base calls	Sanger / Illumina 1.9	3763972	0	0-242	51	51.9252	227.996	pass	pass	fail	pass	fail	fail	pass	fail	warn	warn	pass
FD01876649.comp.rev.paired	FD01876649.comp.rev.paired	Combined	Conventional base calls	Sanger / Illumina 1.9	4183153	0	0-242	51	56.9626	206.977	pass	pass	fail	pass	fail	fail	pass	fail	warn	pass	pass
FD01876649.comp.trim.for.paired	FD01876649.comp.trim.for.paired	Combined	Conventional base calls	Sanger / Illumina 1.9	4183153	0	0-242	51	54.9781	197.843	pass	pass	fail	pass	fail	fail	pass	fail	warn	warn	pass
FD01876655.comp.rev.paired	FD01876655.comp.rev.paired	Combined	Conventional base calls	Sanger / Illumina 1.9	3052054	0	0-242	51	60.2367	217.318	pass	pass	fail	pass	fail	fail	pass	fail	warn	pass	pass
FD01876655.comp.trim.for.paired	FD01876655.comp.trim.for.paired	Combined	Conventional base calls	Sanger / Illumina 1.9	3052054	0	0-242	51	58.2225	214.564	pass	pass	fail	pass	fail	fail	pass	fail	warn	warn	pass
FD01876658.comp.rev.paired	FD01876658.comp.rev.paired	Combined	Conventional base calls	Sanger / Illumina 1.9	2449148	0	0-242	51	63.4953	164.11	pass	pass	fail	pass	fail	warn	pass	fail	warn	pass	pass
FD01876658.comp.trim.for.paired	FD01876658.comp.trim.for.paired	Combined	Conventional base calls	Sanger / Illumina 1.9	2449148	0	0-242	51	67.5688	159.114	pass	pass	fail	pass	fail	fail	pass	fail	warn	warn	pass
FD01876659.comp.rev.paired	FD01876659.comp.rev.paired	Combined	Conventional base calls	Sanger / Illumina 1.9	362808	0	0-242	50	86.4872	139.895	pass	pass	fail	pass	fail	warn	pass	fail	pass	pass	pass
FD01876659.comp.trim.for.paired	FD01876659.comp.trim.for.paired	Combined	Conventional base calls	Sanger / Illumina 1.9	362808	0	0-242	50	84.9608	140.561	pass	pass	fail	pass	fail	fail	pass	fail	pass	warn	pass
FD01876660.comp.rev.paired	FD01876660.comp.rev.paired	Combined	Conventional base calls	Sanger / Illumina 1.9	3950833	0	0-242	51	59.0211	204.418	pass	pass	fail	pass	fail	warn	pass	fail	warn	pass	pass
FD01876660.comp.trim.for.paired	FD01876660.comp.trim.for.paired	Combined	Conventional base calls	Sanger / Illumina 1.9	3950833	0	0-242	51	54.4845	203.8	pass	pass	fail	pass	fail	fail	pass	fail	warn	pass	pass
FD01876661.comp.rev.paired	FD01876661.comp.rev.paired	Combined	Conventional base calls	Sanger / Illumina 1.9	3501169	0	0-242	51	59.6284	212.677	pass	pass	fail	pass	fail	fail	pass	fail	warn	pass	pass
FD01876661.comp.trim.for.paired	FD01876661.comp.trim.for.paired	Combined	Conventional base calls	Sanger / Illumina 1.9	3501169	0	0-242	51	57.2847	207.206	pass	pass	fail	pass	fail	fail	pass	fail	warn	warn	pass
FD01876662.comp.rev.paired	FD01876662.comp.rev.paired	Combined	Conventional base calls	Sanger / Illumina 1.9	3412153	0	0-242	51	60.4143	217.352	pass	pass	fail	pass	fail	fail	pass	fail	warn	pass	pass
FD01876662.comp.trim.for.paired	FD01876662.comp.trim.for.paired	Combined	Conventional base calls	Sanger / Illumina 1.9	3412153	0	0-242	51	58.066	212.886	pass	pass	fail	pass	fail	fail	pass	fail	warn	warn	pass
FD01876663.comp.rev.paired	FD01876663.comp.rev.paired	Combined	Conventional base calls	Sanger / Illumina 1.9	2942490	0	0-242	51	61.6015	212.1	pass	pass	fail	pass	fail	fail	pass	fail	warn	pass	pass
FD01876663.comp.trim.for.paired	FD01876663.comp.trim.for.paired	Combined	Conventional base calls	Sanger / Illumina 1.9	2942490	0	0-242	51	58.7719	210.708	pass	pass	fail	pass	fail	fail	pass	fail	warn	warn	pass
FD01876664.comp.rev.paired	FD01876664.comp.rev.paired	Combined	Conventional base calls	Sanger / Illumina 1.9	4116200	0	0-242	51	55.8313	205.264	pass	pass	fail	pass	fail	warn	pass	fail	warn	pass	pass
FD01876664.comp.trim.for.paired	FD01876664.comp.trim.for.paired	Combined	Conventional base calls	Sanger / Illumina 1.9	4116200	0	0-242	51	53.7434	196.32	pass	pass	fail	pass	fail	fail	pass	fail	warn	warn	pass
FD01876665.comp.rev.paired	FD01876665.comp.rev.paired	Combined	Conventional base calls	Sanger / Illumina 1.9	3453146	0	0-242	51	60.4618	229.297	pass	pass	fail	pass	fail	fail	pass	fail	warn	pass	pass
FD01876665.comp.trim.for.paired	FD01876665.comp.trim.for.paired	Combined	Conventional base calls	Sanger / Illumina 1.9	3453146	0	0-242	51	57.989	229.141	pass	pass	fail	pass	fail	fail	pass	fail	warn	pass	pass
FD01876669.comp.rev.paired	FD01876669.comp.rev.paired	Combined	Conventional base calls	Sanger / Illumina 1.9	3515253	0	0-242	51	61.2289	187.451	pass	pass	fail	pass	fail	warn	pass	fail	warn	pass	pass
FD01876669.comp.trim.for.paired	FD01876669.comp.trim.for.paired	Combined	Conventional base calls	Sanger / Illumina 1.9	3515253	0	0-242	51	59.8532	178.543	pass	pass	fail	pass	fail	fail	pass	fail	warn	warn	pass
FD01876670.comp.rev.paired	FD01876670.comp.rev.paired	Combined	Conventional base calls	Sanger / Illumina 1.9	2969942	0	0-242	51	64.4859	228.031	pass	pass	fail	pass	fail	fail	pass	fail	warn	pass	pass
FD01876670.comp.trim.for.paired	FD01876670.comp.trim.for.paired	Combined	Conventional base calls	Sanger / Illumina 1.9	2969942	0	0-242	51	61.8628	227.031	pass	pass	fail	pass	fail	fail	pass	fail	warn	pass	pass
FD01876671.comp.rev.paired	FD01876671.comp.rev.paired	Combined	Conventional base calls	Sanger / Illumina 1.9	3857698	0	0-242	51	57.4086	208.892	pass	pass	fail	pass	fail	warn	pass	fail	warn	pass	pass
FD01876671.comp.trim.for.paired	FD01876671.comp.trim.for.paired	Combined	Conventional base calls	Sanger / Illumina 1.9	3857698	0	0-242	51	55.8771	208.629	pass	pass	fail	pass	fail	fail	pass	fail	warn	pass	pass
FD01876672.comp.rev.paired	FD01876672.comp.rev.paired	Combined	Conventional base calls	Sanger / Illumina 1.9	3352115	0	0-242	51	57.1234	228.005	pass	pass	fail	pass	fail	fail	pass	fail	warn	pass	pass
FD01876672.comp.trim.for.paired	FD01876672.comp.trim.for.paired	Combined	Conventional base calls	Sanger / Illumina 1.9	3352115	0	0-242	51	55.6292	227.101	pass	pass	fail	pass	fail	fail	pass	fail	warn	pass	pass
FD01876674.comp.rev.paired	FD01876674.comp.rev.paired	Combined	Conventional base calls	Sanger / Illumina 1.9	2670456	0	0-242	51	60.367	219.812	pass	pass	fail	pass	fail	fail	pass	fail	warn	pass	pass
FD01876674.comp.trim.for.paired	FD01876674.comp.trim.for.paired	Combined	Conventional base calls	Sanger / Illumina 1.9	2670456	0	0-242	51	58.3458	219.745	pass	pass	fail	pass	fail	fail	pass	fail	warn	pass	pass
FD01876675.comp.rev.paired	FD01876675.comp.rev.paired	Combined	Conventional base calls	Sanger / Illumina 1.9	4970671	0	0-242	51	54.2401	175.637	pass	pass	fail	pass	fail	warn	pass	fail	warn	pass	pass
FD01876675.comp.trim.for.paired	FD01876675.comp.trim.for.paired	Combined	Conventional base calls	Sanger / Illumina 1.9	4970671	0	0-242	51	52.6359	161.761	pass	pass	fail	pass	fail	fail	pass	fail	warn	warn	pass
FD01876676.comp.rev.paired	FD01876676.comp.rev.paired	Combined	Conventional base calls	Sanger / Illumina 1.9	2765311	0	0-242	51	63.4314	219.657	pass	pass	fail	pass	fail	fail	pass	fail	warn	pass	pass
FD01876676.comp.trim.for.paired	FD01876676.comp.trim.for.paired	Combined	Conventional base calls	Sanger / Illumina 1.9	2765311	0	0-242	51	61.4496	218.572	pass	pass	fail	pass	fail	fail	pass	fail	warn	warn	pass
FD01876677.comp.rev.paired	FD01876677.comp.rev.paired	Combined	Conventional base calls	Sanger / Illumina 1.9	4351841	0	0-242	51	58.9824	222.072	pass	pass	fail	pass	fail	fail	pass	fail	warn	pass	pass
FD01876677.comp.trim.for.paired	FD01876677.comp.trim.for.paired	Combined	Conventional base calls	Sanger / Illumina 1.9	4351841	0	0-242	51	56.802	218.695	pass	pass	fail	pass	fail	fail	pass	fail	warn	warn	pass
FD01876679.comp.rev.paired	FD01876679.comp.rev.paired	Combined	Conventional base calls	Sanger / Illumina 1.9	4725785	0	0-242	51	53.7546	208.488	pass	pass	fail	pass	warn	warn	pass	fail	warn	pass	pass
FD01876679.comp.trim.for.paired	FD01876679.comp.trim.for.paired	Combined	Conventional base calls	Sanger / Illumina 1.9	4725785	0	0-242	51	52.1532	199.611	pass	pass	fail	pass	fail	fail	pass	fail	warn	warn	pass
FD01876680.comp.rev.paired	FD01876680.comp.rev.paired	Combined	Conventional base calls	Sanger / Illumina 1.9	3172235	0	0-242	50	58.4184	221.019	pass	pass	fail	pass	fail	fail	pass	fail	warn	pass	pass
FD01876680.comp.trim.for.paired	FD01876680.comp.trim.for.paired	Combined	Conventional base calls	Sanger / Illumina 1.9	3172235	0	0-242	50	54.1879	221.271	pass	pass	fail	pass	fail	fail	pass	fail	warn	pass	pass
FD01876682.comp.rev.paired	FD01876682.comp.rev.paired	Combined	Conventional base calls	Sanger / Illumina 1.9	3956695	0	0-242	51	56.4963	182.245	pass	pass	fail	pass	fail	warn	pass	fail	warn	pass	pass
FD01876682.comp.trim.for.paired	FD01876682.comp.trim.for.paired	Combined	Conventional base calls	Sanger / Illumina 1.9	3956695	0	0-242	51	55.632	182.228	pass	pass	fail	pass	fail	warn	pass	fail	warn	pass	pass
FD01876684.comp.rev.paired	FD01876684.comp.rev.paired	Combined	Conventional base calls	Sanger / Illumina 1.9	3066183	0	0-242	51	60.9158	220.902	pass	pass	fail	pass	fail	fail	pass	fail	warn	pass	pass
FD01876684.comp.trim.for.paired	FD01876684.comp.trim.for.paired	Combined	Conventional base calls	Sanger / Illumina 1.9	3066183	0	0-242	51	59.8089	217.487	pass	pass	fail	pass	fail	fail	pass	fail	warn	warn	pass
FD01876685.comp.rev.paired	FD01876685.comp.rev.paired	Combined	Conventional base calls	Sanger / Illumina 1.9	3564273	0	0-242	51	57.3427	215.033	pass	pass	fail	pass	fail	fail	pass	fail	warn	pass	pass
FD01876685.comp.trim.for.paired	FD01876685.comp.trim.for.paired	Combined	Conventional base calls	Sanger / Illumina 1.9	3564273	0	0-242	51	55.1574	215.204	pass	pass	fail	pass	fail	warn	pass	fail	warn	pass	pass
FD01876686.comp.rev.paired	FD01876686.comp.rev.paired	Combined	Conventional base calls	Sanger / Illumina 1.9	3057038	0	0-242	51	60.1401	211.95	pass	pass	fail	pass	fail	fail	pass	fail	warn	pass	pass
FD01876686.comp.trim.for.paired	FD01876686.comp.trim.for.paired	Combined	Conventional base calls	Sanger / Illumina 1.9	3057038	0	0-242	51	61.8101	205.912	pass	pass	fail	pass	fail	fail	pass	fail	warn	warn	pass
FD01876687.comp.rev.paired	FD01876687.comp.rev.paired	Combined	Conventional base calls	Sanger / Illumina 1.9	3799262	0	0-242	51	55.6824	226.279	pass	pass	fail	pass	fail	fail	pass	fail	warn	pass	pass
FD01876687.comp.trim.for.paired	FD01876687.comp.trim.for.paired	Combined	Conventional base calls	Sanger / Illumina 1.9	3799262	0	0-242	51	58.7331	224.116	pass	pass	fail	pass	fail	fail	pass	fail	warn	warn	pass
FD01876688.comp.rev.paired	FD01876688.comp.rev.paired	Combined	Conventional base calls	Sanger / Illumina 1.9	3427922	0	0-242	50	54.8391	224.649	pass	pass	fail	pass	fail	fail	pass	fail	warn	pass	pass
FD01876688.comp.trim.for.paired	FD01876688.comp.trim.for.paired	Combined	Conventional base calls	Sanger / Illumina 1.9	3427922	0	0-242	50	52.3134	224.872	pass	pass	fail	pass	fail	fail	pass	fail	warn	pass	pass
FD01876695.comp.rev.paired	FD01876695.comp.rev.paired	Combined	Conventional base calls	Sanger / Illumina 1.9	2507116	0	0-242	51	66.5368	230.383	pass	pass	fail	pass	fail	fail	pass	fail	warn	pass	pass
FD01876695.comp.trim.for.paired	FD01876695.comp.trim.for.paired	Combined	Conventional base calls	Sanger / Illumina 1.9	2507116	0	0-242	51	64.4949	229.391	pass	pass	fail	pass	fail	fail	pass	fail	warn	warn	pass

## Sheet: sonnei read QC
Sample	Filename	Original or resequenced	File type	Encoding	Total Sequences	Sequences flagged as poor quality	Sequence length	%GC	total_deduplicated_percentage	avg_sequence_length	basic_statistics	per_base_sequence_quality	per_tile_sequence_quality	per_sequence_quality_scores	per_base_sequence_content	per_sequence_gc_content	per_base_n_content	sequence_length_distribution	sequence_duplication_levels	overrepresented_sequences	adapter_content
FD01873906.for.paired	FD01873906.for.paired	Original	Conventional base calls	Sanger / Illumina 1.9	532211	0	0-143	50	69.9851	139.582	pass	pass	warn	pass	fail	fail	pass	fail	warn	pass	pass
FD01873906.rev.paired	FD01873906.rev.paired	Original	Conventional base calls	Sanger / Illumina 1.9	532211	0	0-143	49	71.6559	139.407	pass	pass	warn	pass	fail	warn	pass	fail	pass	pass	pass
FD01873907.for.paired	FD01873907.for.paired	Original	Conventional base calls	Sanger / Illumina 1.9	580569	0	0-143	50	73.2273	140.061	pass	pass	pass	pass	fail	fail	pass	fail	pass	warn	pass
FD01873907.rev.paired	FD01873907.rev.paired	Original	Conventional base calls	Sanger / Illumina 1.9	580569	0	0-143	50	74.5582	139.258	pass	pass	warn	pass	fail	warn	pass	fail	pass	pass	pass
FD01873908.for.paired	FD01873908.for.paired	Original	Conventional base calls	Sanger / Illumina 1.9	539351	0	0-143	49	71.7377	140.348	pass	pass	pass	pass	fail	fail	pass	fail	pass	warn	pass
FD01873908.rev.paired	FD01873908.rev.paired	Original	Conventional base calls	Sanger / Illumina 1.9	539351	0	0-143	49	73.0389	139.543	pass	pass	warn	pass	fail	warn	pass	fail	pass	pass	pass
FD01873909.for.paired	FD01873909.for.paired	Original	Conventional base calls	Sanger / Illumina 1.9	451786	0	0-143	49	73.9326	140.473	pass	pass	pass	pass	fail	warn	pass	fail	pass	pass	pass
FD01873909.rev.paired	FD01873909.rev.paired	Original	Conventional base calls	Sanger / Illumina 1.9	451786	0	0-143	49	75.4624	139.614	pass	pass	warn	pass	fail	fail	pass	fail	pass	pass	pass
FD01873910.for.paired	FD01873910.for.paired	Original	Conventional base calls	Sanger / Illumina 1.9	10385	0	0-143	49	94.2417	139.642	pass	pass	warn	pass	fail	fail	pass	fail	pass	warn	pass
FD01873910.rev.paired	FD01873910.rev.paired	Original	Conventional base calls	Sanger / Illumina 1.9	10385	0	0-143	49	94.6461	138.492	pass	pass	warn	pass	fail	warn	pass	fail	pass	pass	pass
FD01873911.for.paired	FD01873911.for.paired	Original	Conventional base calls	Sanger / Illumina 1.9	606209	0	0-143	49	60.9805	141.137	pass	pass	pass	pass	fail	fail	pass	fail	warn	pass	pass
FD01873911.rev.paired	FD01873911.rev.paired	Original	Conventional base calls	Sanger / Illumina 1.9	606209	0	0-143	49	62.7567	140.044	pass	pass	warn	pass	fail	fail	pass	fail	warn	pass	pass
FD01873912.for.paired	FD01873912.for.paired	Original	Conventional base calls	Sanger / Illumina 1.9	2353	0	0-143	50	98.9375	138.398	pass	pass	fail	pass	fail	warn	pass	fail	pass	warn	pass
FD01873912.rev.paired	FD01873912.rev.paired	Original	Conventional base calls	Sanger / Illumina 1.9	2353	0	7-143	50	99.2775	136.764	pass	pass	fail	pass	warn	warn	pass	warn	pass	warn	pass
FD01873914.for.paired	FD01873914.for.paired	Original	Conventional base calls	Sanger / Illumina 1.9	589033	0	0-143	49	74.691	139.542	pass	pass	warn	pass	fail	fail	pass	fail	pass	pass	pass
FD01873914.rev.paired	FD01873914.rev.paired	Original	Conventional base calls	Sanger / Illumina 1.9	589033	0	0-143	49	76.4132	139.377	pass	pass	warn	pass	fail	warn	pass	fail	pass	pass	pass
FD01873915.for.paired	FD01873915.for.paired	Original	Conventional base calls	Sanger / Illumina 1.9	648924	0	0-143	50	67.368	140.418	pass	pass	pass	pass	fail	fail	pass	fail	warn	pass	pass
FD01873915.rev.paired	FD01873915.rev.paired	Original	Conventional base calls	Sanger / Illumina 1.9	648924	0	0-143	50	69.0475	139.461	pass	pass	warn	pass	fail	warn	pass	fail	warn	pass	pass
FD01873916.for.paired	FD01873916.for.paired	Original	Conventional base calls	Sanger / Illumina 1.9	536959	0	0-143	49	73.4401	139.431	pass	pass	pass	pass	fail	fail	pass	fail	pass	pass	pass
FD01873916.rev.paired	FD01873916.rev.paired	Original	Conventional base calls	Sanger / Illumina 1.9	536959	0	0-143	49	74.4363	139.845	pass	pass	warn	pass	fail	warn	pass	fail	pass	pass	pass
FD01873917.for.paired	FD01873917.for.paired	Original	Conventional base calls	Sanger / Illumina 1.9	635635	0	0-143	50	72.3161	141.105	pass	pass	pass	pass	fail	fail	pass	fail	pass	pass	pass
FD01873917.rev.paired	FD01873917.rev.paired	Original	Conventional base calls	Sanger / Illumina 1.9	635635	0	0-143	49	73.7387	139.976	pass	pass	warn	pass	fail	warn	pass	fail	pass	pass	pass
FD01873918.for.paired	FD01873918.for.paired	Original	Conventional base calls	Sanger / Illumina 1.9	612455	0	0-143	49	63.9476	141.147	pass	pass	pass	pass	fail	warn	pass	fail	warn	pass	pass
FD01873918.rev.paired	FD01873918.rev.paired	Original	Conventional base calls	Sanger / Illumina 1.9	612455	0	0-143	49	65.832	140.021	pass	pass	warn	pass	fail	warn	pass	fail	warn	pass	pass
FD01873919.for.paired	FD01873919.for.paired	Original	Conventional base calls	Sanger / Illumina 1.9	515232	0	0-143	49	70.6481	140.897	pass	pass	pass	pass	fail	fail	pass	fail	pass	pass	pass
FD01873919.rev.paired	FD01873919.rev.paired	Original	Conventional base calls	Sanger / Illumina 1.9	515232	0	0-143	49	71.9844	139.884	pass	pass	warn	pass	fail	warn	pass	fail	pass	pass	pass
FD01873920.for.paired	FD01873920.for.paired	Original	Conventional base calls	Sanger / Illumina 1.9	412571	0	0-143	51	81.45	137.801	pass	pass	pass	pass	fail	fail	pass	fail	pass	warn	pass
FD01873920.rev.paired	FD01873920.rev.paired	Original	Conventional base calls	Sanger / Illumina 1.9	412571	0	0-143	51	82.8162	137.658	pass	pass	warn	pass	fail	warn	pass	fail	pass	pass	pass
FD01873922.for.paired	FD01873922.for.paired	Original	Conventional base calls	Sanger / Illumina 1.9	551139	0	0-143	49	69.5384	140.939	pass	pass	pass	pass	fail	warn	pass	fail	warn	pass	pass
FD01873922.rev.paired	FD01873922.rev.paired	Original	Conventional base calls	Sanger / Illumina 1.9	551139	0	0-143	49	70.9987	139.907	pass	pass	warn	pass	fail	warn	pass	fail	pass	pass	pass
FD01873923.for.paired	FD01873923.for.paired	Original	Conventional base calls	Sanger / Illumina 1.9	574587	0	0-143	50	70.6238	140.963	pass	pass	pass	pass	fail	fail	pass	fail	pass	pass	pass
FD01873923.rev.paired	FD01873923.rev.paired	Original	Conventional base calls	Sanger / Illumina 1.9	574587	0	0-143	50	72.3135	139.813	pass	pass	warn	pass	fail	warn	pass	fail	pass	pass	pass
FD01873924.for.paired	FD01873924.for.paired	Original	Conventional base calls	Sanger / Illumina 1.9	422010	0	0-143	50	75.3464	140.779	pass	pass	pass	pass	fail	fail	pass	fail	pass	pass	pass
FD01873924.rev.paired	FD01873924.rev.paired	Original	Conventional base calls	Sanger / Illumina 1.9	422010	0	0-143	50	76.9255	139.728	pass	pass	warn	pass	fail	warn	pass	fail	pass	pass	pass
FD01873925.for.paired	FD01873925.for.paired	Original	Conventional base calls	Sanger / Illumina 1.9	654088	0	0-143	49	69.4639	140.768	pass	pass	pass	pass	fail	warn	pass	fail	warn	pass	pass
FD01873925.rev.paired	FD01873925.rev.paired	Original	Conventional base calls	Sanger / Illumina 1.9	654088	0	0-143	49	71.1558	139.713	pass	pass	warn	pass	fail	warn	pass	fail	pass	pass	pass
FD01873926.for.paired	FD01873926.for.paired	Original	Conventional base calls	Sanger / Illumina 1.9	597057	0	0-143	50	73.2358	141.09	pass	pass	pass	pass	fail	warn	pass	fail	pass	pass	pass
FD01873926.rev.paired	FD01873926.rev.paired	Original	Conventional base calls	Sanger / Illumina 1.9	597057	0	0-143	50	74.7916	139.948	pass	pass	warn	pass	warn	warn	pass	fail	pass	pass	pass
FD01873927.for.paired	FD01873927.for.paired	Original	Conventional base calls	Sanger / Illumina 1.9	511698	0	0-143	49	66.8459	140.949	pass	pass	pass	pass	fail	fail	pass	fail	warn	pass	pass
FD01873927.rev.paired	FD01873927.rev.paired	Original	Conventional base calls	Sanger / Illumina 1.9	511698	0	0-143	49	68.4215	139.991	pass	pass	warn	pass	fail	warn	pass	fail	warn	pass	pass
FD01873928.for.paired	FD01873928.for.paired	Original	Conventional base calls	Sanger / Illumina 1.9	570310	0	0-143	50	77.3869	140.892	pass	pass	pass	pass	fail	warn	pass	fail	pass	pass	pass
FD01873928.rev.paired	FD01873928.rev.paired	Original	Conventional base calls	Sanger / Illumina 1.9	570310	0	0-143	50	78.601	139.921	pass	pass	warn	pass	fail	warn	pass	fail	pass	pass	pass
FD01873930.for.paired	FD01873930.for.paired	Original	Conventional base calls	Sanger / Illumina 1.9	647393	0	0-143	49	71.2713	139.281	pass	pass	warn	pass	fail	fail	pass	fail	pass	pass	pass
FD01873930.rev.paired	FD01873930.rev.paired	Original	Conventional base calls	Sanger / Illumina 1.9	647393	0	0-143	49	72.2893	139.951	pass	pass	warn	pass	fail	warn	pass	fail	pass	pass	pass
FD01873931.for.paired	FD01873931.for.paired	Original	Conventional base calls	Sanger / Illumina 1.9	657544	0	0-143	50	72.2972	140.853	pass	pass	pass	pass	fail	fail	pass	fail	pass	pass	pass
FD01873931.rev.paired	FD01873931.rev.paired	Original	Conventional base calls	Sanger / Illumina 1.9	657544	0	0-143	49	73.645	139.812	pass	pass	warn	pass	fail	fail	pass	fail	pass	pass	pass
FD01873932.for.paired	FD01873932.for.paired	Original	Conventional base calls	Sanger / Illumina 1.9	535924	0	0-143	50	74.0051	140.738	pass	pass	pass	pass	fail	warn	pass	fail	pass	pass	pass
FD01873932.rev.paired	FD01873932.rev.paired	Original	Conventional base calls	Sanger / Illumina 1.9	535924	0	0-143	50	75.5501	139.703	pass	pass	warn	pass	fail	warn	pass	fail	pass	pass	pass
FD01873933.for.paired	FD01873933.for.paired	Original	Conventional base calls	Sanger / Illumina 1.9	571440	0	0-143	49	70.7202	141.138	pass	pass	pass	pass	fail	warn	pass	fail	pass	pass	pass
FD01873933.rev.paired	FD01873933.rev.paired	Original	Conventional base calls	Sanger / Illumina 1.9	571440	0	0-143	49	72.1393	140.015	pass	pass	warn	pass	fail	warn	pass	fail	pass	pass	pass
FD01873934.for.paired	FD01873934.for.paired	Original	Conventional base calls	Sanger / Illumina 1.9	619794	0	0-143	50	70.8831	140.689	pass	pass	pass	pass	fail	warn	pass	fail	pass	pass	pass
FD01873934.rev.paired	FD01873934.rev.paired	Original	Conventional base calls	Sanger / Illumina 1.9	619794	0	0-143	50	72.239	139.68	pass	pass	warn	pass	fail	warn	pass	fail	pass	pass	pass
FD01873935.for.paired	FD01873935.for.paired	Original	Conventional base calls	Sanger / Illumina 1.9	523310	0	0-143	50	75.6468	140.932	pass	pass	pass	pass	fail	fail	pass	fail	pass	pass	pass
FD01873935.rev.paired	FD01873935.rev.paired	Original	Conventional base calls	Sanger / Illumina 1.9	523310	0	0-143	50	77.0843	139.9	pass	pass	warn	pass	fail	warn	pass	fail	pass	pass	pass
FD01873936.for.paired	FD01873936.for.paired	Original	Conventional base calls	Sanger / Illumina 1.9	499761	0	0-143	50	75.8257	140.868	pass	pass	pass	pass	fail	warn	pass	fail	pass	pass	pass
FD01873936.rev.paired	FD01873936.rev.paired	Original	Conventional base calls	Sanger / Illumina 1.9	499761	0	0-143	50	77.2817	139.777	pass	pass	warn	pass	fail	warn	pass	fail	pass	pass	pass
FD01873938.for.paired	FD01873938.for.paired	Original	Conventional base calls	Sanger / Illumina 1.9	556012	0	0-143	50	72.013	140.96	pass	pass	pass	pass	fail	fail	pass	fail	pass	pass	pass
FD01873938.rev.paired	FD01873938.rev.paired	Original	Conventional base calls	Sanger / Illumina 1.9	556012	0	0-143	50	73.8324	139.811	pass	pass	warn	pass	fail	warn	pass	fail	pass	pass	pass
FD01873939.for.paired	FD01873939.for.paired	Original	Conventional base calls	Sanger / Illumina 1.9	600543	0	0-143	50	67.3155	140.717	pass	pass	pass	pass	fail	warn	pass	fail	warn	pass	pass
FD01873939.rev.paired	FD01873939.rev.paired	Original	Conventional base calls	Sanger / Illumina 1.9	600543	0	0-143	49	69.1789	139.694	pass	pass	warn	pass	fail	warn	pass	fail	warn	pass	pass
FD01873940.for.paired	FD01873940.for.paired	Original	Conventional base calls	Sanger / Illumina 1.9	627469	0	0-143	50	71.4569	141.035	pass	pass	pass	pass	fail	fail	pass	fail	pass	pass	pass
FD01873940.rev.paired	FD01873940.rev.paired	Original	Conventional base calls	Sanger / Illumina 1.9	627469	0	0-143	50	73.1054	139.873	pass	pass	warn	pass	fail	warn	pass	fail	pass	pass	pass
FD01873941.for.paired	FD01873941.for.paired	Original	Conventional base calls	Sanger / Illumina 1.9	634639	0	0-143	50	69.9423	140.784	pass	pass	pass	pass	fail	fail	pass	fail	warn	pass	pass
FD01873941.rev.paired	FD01873941.rev.paired	Original	Conventional base calls	Sanger / Illumina 1.9	634639	0	0-143	50	71.6496	139.778	pass	pass	warn	pass	fail	warn	pass	fail	pass	pass	pass
FD01873942.for.paired	FD01873942.for.paired	Original	Conventional base calls	Sanger / Illumina 1.9	574507	0	0-143	49	65.4185	140.61	pass	pass	pass	pass	fail	fail	pass	fail	warn	pass	pass
FD01873942.rev.paired	FD01873942.rev.paired	Original	Conventional base calls	Sanger / Illumina 1.9	574507	0	0-143	49	67.0628	139.776	pass	pass	warn	pass	fail	fail	pass	fail	warn	pass	pass
FD01873943.for.paired	FD01873943.for.paired	Original	Conventional base calls	Sanger / Illumina 1.9	495734	0	0-143	50	74.4934	140.561	pass	pass	pass	pass	fail	warn	pass	fail	pass	pass	pass
FD01873943.rev.paired	FD01873943.rev.paired	Original	Conventional base calls	Sanger / Illumina 1.9	495734	0	0-143	50	76.1961	139.689	pass	pass	warn	pass	fail	fail	pass	fail	pass	pass	pass
FD01873944.for.paired	FD01873944.for.paired	Original	Conventional base calls	Sanger / Illumina 1.9	503354	0	0-143	50	79.6341	138.155	pass	pass	pass	pass	fail	fail	pass	fail	pass	warn	pass
FD01873944.rev.paired	FD01873944.rev.paired	Original	Conventional base calls	Sanger / Illumina 1.9	503354	0	0-143	49	80.9743	138.628	pass	pass	warn	pass	fail	warn	pass	fail	pass	pass	pass
FD01873946.for.paired	FD01873946.for.paired	Original	Conventional base calls	Sanger / Illumina 1.9	553195	0	0-143	50	75.6922	140.85	pass	pass	pass	pass	fail	warn	pass	fail	pass	pass	pass
FD01873946.rev.paired	FD01873946.rev.paired	Original	Conventional base calls	Sanger / Illumina 1.9	553195	0	0-143	50	77.5254	139.848	pass	pass	warn	pass	fail	warn	pass	fail	pass	pass	pass
FD01873947.for.paired	FD01873947.for.paired	Original	Conventional base calls	Sanger / Illumina 1.9	606940	0	0-143	49	66.517	140.729	pass	pass	pass	pass	fail	warn	pass	fail	warn	pass	pass
FD01873947.rev.paired	FD01873947.rev.paired	Original	Conventional base calls	Sanger / Illumina 1.9	606940	0	0-143	49	68.0182	139.774	pass	pass	warn	pass	fail	warn	pass	fail	warn	pass	pass
FD01873948.for.paired	FD01873948.for.paired	Original	Conventional base calls	Sanger / Illumina 1.9	758941	0	0-143	49	67.8147	140.381	pass	pass	warn	pass	fail	warn	pass	fail	warn	pass	pass
FD01873948.rev.paired	FD01873948.rev.paired	Original	Conventional base calls	Sanger / Illumina 1.9	758941	0	0-143	49	69.4997	139.717	pass	pass	warn	pass	fail	warn	pass	fail	warn	pass	pass
FD01873949.for.paired	FD01873949.for.paired	Original	Conventional base calls	Sanger / Illumina 1.9	491177	0	0-143	49	69.3497	139.749	pass	pass	pass	pass	fail	fail	pass	fail	warn	pass	pass
FD01873949.rev.paired	FD01873949.rev.paired	Original	Conventional base calls	Sanger / Illumina 1.9	491177	0	0-143	49	71.2417	139.577	pass	pass	warn	pass	fail	fail	pass	fail	pass	pass	pass
FD01873950.for.paired	FD01873950.for.paired	Original	Conventional base calls	Sanger / Illumina 1.9	522432	0	0-143	50	72.8185	141.055	pass	pass	pass	pass	fail	fail	pass	fail	pass	pass	pass
FD01873950.rev.paired	FD01873950.rev.paired	Original	Conventional base calls	Sanger / Illumina 1.9	522432	0	0-143	50	74.0286	140.01	pass	pass	warn	pass	fail	warn	pass	fail	pass	pass	pass
FD01873951.for.paired	FD01873951.for.paired	Original	Conventional base calls	Sanger / Illumina 1.9	588297	0	0-143	50	68.8897	140.913	pass	pass	pass	pass	fail	fail	pass	fail	warn	pass	pass
FD01873951.rev.paired	FD01873951.rev.paired	Original	Conventional base calls	Sanger / Illumina 1.9	588297	0	0-143	50	70.2358	139.912	pass	pass	warn	pass	fail	warn	pass	fail	pass	pass	pass
FD01873952.for.paired	FD01873952.for.paired	Original	Conventional base calls	Sanger / Illumina 1.9	590339	0	0-143	50	74.9062	141.1	pass	pass	pass	pass	fail	warn	pass	fail	pass	pass	pass
FD01873952.rev.paired	FD01873952.rev.paired	Original	Conventional base calls	Sanger / Illumina 1.9	590339	0	0-143	50	76.2669	140.011	pass	pass	warn	pass	fail	warn	pass	fail	pass	pass	pass
FD01873954.for.paired	FD01873954.for.paired	Original	Conventional base calls	Sanger / Illumina 1.9	632837	0	0-143	50	70.7669	140.918	pass	pass	pass	pass	fail	fail	pass	fail	pass	pass	pass
FD01873954.rev.paired	FD01873954.rev.paired	Original	Conventional base calls	Sanger / Illumina 1.9	632837	0	0-143	49	72.4073	139.829	pass	pass	warn	pass	fail	warn	pass	fail	pass	pass	pass
FD01873955.for.paired	FD01873955.for.paired	Original	Conventional base calls	Sanger / Illumina 1.9	556034	0	0-143	50	72.5662	140.798	pass	pass	pass	pass	fail	fail	pass	fail	pass	pass	pass
FD01873955.rev.paired	FD01873955.rev.paired	Original	Conventional base calls	Sanger / Illumina 1.9	556034	0	0-143	50	73.8119	139.809	pass	pass	warn	pass	fail	warn	pass	fail	pass	pass	pass
FD01873956.for.paired	FD01873956.for.paired	Original	Conventional base calls	Sanger / Illumina 1.9	538682	0	0-143	50	76.1189	140.965	pass	pass	pass	pass	fail	warn	pass	fail	pass	pass	pass
FD01873956.rev.paired	FD01873956.rev.paired	Original	Conventional base calls	Sanger / Illumina 1.9	538682	0	0-143	50	77.6912	139.857	pass	pass	warn	pass	fail	warn	pass	fail	pass	pass	pass
FD01873957.for.paired	FD01873957.for.paired	Original	Conventional base calls	Sanger / Illumina 1.9	653903	0	0-143	49	64.6048	140.997	pass	pass	pass	pass	fail	fail	pass	fail	warn	pass	pass
FD01873957.rev.paired	FD01873957.rev.paired	Original	Conventional base calls	Sanger / Illumina 1.9	653903	0	0-143	49	66.3778	139.88	pass	pass	warn	pass	fail	warn	pass	fail	warn	pass	pass
FD01873958.for.paired	FD01873958.for.paired	Original	Conventional base calls	Sanger / Illumina 1.9	554375	0	0-143	49	69.6629	141.09	pass	pass	pass	pass	fail	warn	pass	fail	warn	pass	pass
FD01873958.rev.paired	FD01873958.rev.paired	Original	Conventional base calls	Sanger / Illumina 1.9	554375	0	0-143	49	71.3181	139.962	pass	pass	warn	pass	fail	warn	pass	fail	pass	pass	pass
FD01873959.for.paired	FD01873959.for.paired	Original	Conventional base calls	Sanger / Illumina 1.9	554925	0	0-143	50	73.1878	141.045	pass	pass	pass	pass	fail	fail	pass	fail	pass	pass	pass
FD01873959.rev.paired	FD01873959.rev.paired	Original	Conventional base calls	Sanger / Illumina 1.9	554925	0	0-143	49	74.622	140.048	pass	pass	warn	pass	fail	warn	pass	fail	pass	pass	pass
FD01873960.for.paired	FD01873960.for.paired	Original	Conventional base calls	Sanger / Illumina 1.9	507463	0	0-143	49	61.2577	141.216	pass	pass	pass	pass	fail	fail	pass	fail	warn	pass	pass
FD01873960.rev.paired	FD01873960.rev.paired	Original	Conventional base calls	Sanger / Illumina 1.9	507463	0	0-143	49	63.0296	140.078	pass	pass	warn	pass	fail	fail	pass	fail	warn	pass	pass
FD01873962.for.paired	FD01873962.for.paired	Original	Conventional base calls	Sanger / Illumina 1.9	504510	0	0-143	50	75.3856	140.898	pass	pass	pass	pass	fail	warn	pass	fail	pass	pass	pass
FD01873962.rev.paired	FD01873962.rev.paired	Original	Conventional base calls	Sanger / Illumina 1.9	504510	0	0-143	50	76.8858	139.81	pass	pass	warn	pass	fail	warn	pass	fail	pass	pass	pass
FD01873963.for.paired	FD01873963.for.paired	Original	Conventional base calls	Sanger / Illumina 1.9	467466	0	0-143	50	77.4196	141.084	pass	pass	pass	pass	fail	fail	pass	fail	pass	pass	pass
FD01873963.rev.paired	FD01873963.rev.paired	Original	Conventional base calls	Sanger / Illumina 1.9	467466	0	0-143	50	78.6739	139.979	pass	pass	warn	pass	fail	warn	pass	fail	pass	pass	pass
FD01873964.for.paired	FD01873964.for.paired	Original	Conventional base calls	Sanger / Illumina 1.9	455866	0	0-143	50	74.0191	140.899	pass	pass	pass	pass	fail	fail	pass	fail	pass	pass	pass
FD01873964.rev.paired	FD01873964.rev.paired	Original	Conventional base calls	Sanger / Illumina 1.9	455866	0	0-143	50	75.7142	139.76	pass	pass	warn	pass	fail	warn	pass	fail	pass	pass	pass
FD01873965.for.paired	FD01873965.for.paired	Original	Conventional base calls	Sanger / Illumina 1.9	515295	0	0-143	49	66.813	140.959	pass	pass	pass	pass	fail	fail	pass	fail	warn	pass	pass
FD01873965.rev.paired	FD01873965.rev.paired	Original	Conventional base calls	Sanger / Illumina 1.9	515295	0	0-143	49	68.52	139.814	pass	pass	warn	pass	fail	warn	pass	fail	warn	pass	pass
FD01873966.for.paired	FD01873966.for.paired	Original	Conventional base calls	Sanger / Illumina 1.9	446684	0	0-143	50	73.4544	140.562	pass	pass	pass	pass	fail	fail	pass	fail	pass	pass	pass
FD01873966.rev.paired	FD01873966.rev.paired	Original	Conventional base calls	Sanger / Illumina 1.9	446684	0	0-143	50	74.9093	139.513	pass	pass	warn	pass	fail	warn	pass	fail	pass	pass	pass
FD01873967.for.paired	FD01873967.for.paired	Original	Conventional base calls	Sanger / Illumina 1.9	434946	0	0-143	49	70.7283	140.324	pass	pass	pass	pass	fail	fail	pass	fail	pass	warn	pass
FD01873967.rev.paired	FD01873967.rev.paired	Original	Conventional base calls	Sanger / Illumina 1.9	434946	0	0-143	49	72.4041	139.304	pass	pass	warn	pass	fail	warn	pass	fail	pass	pass	pass
FD01873968.for.paired	FD01873968.for.paired	Original	Conventional base calls	Sanger / Illumina 1.9	645233	0	0-143	50	73.8348	141.152	pass	pass	pass	pass	fail	warn	pass	fail	pass	pass	pass
FD01873968.rev.paired	FD01873968.rev.paired	Original	Conventional base calls	Sanger / Illumina 1.9	645233	0	0-143	50	75.3348	139.953	pass	pass	warn	pass	fail	warn	pass	fail	pass	pass	pass
FD01873970.for.paired	FD01873970.for.paired	Original	Conventional base calls	Sanger / Illumina 1.9	600235	0	0-143	50	70.1159	140.949	pass	pass	pass	pass	fail	fail	pass	fail	pass	pass	pass
FD01873970.rev.paired	FD01873970.rev.paired	Original	Conventional base calls	Sanger / Illumina 1.9	600235	0	0-143	50	71.9848	139.84	pass	pass	warn	pass	fail	warn	pass	fail	pass	pass	pass
FD01873971.for.paired	FD01873971.for.paired	Original	Conventional base calls	Sanger / Illumina 1.9	482422	0	0-143	49	72.8433	140.786	pass	pass	pass	pass	fail	fail	pass	fail	pass	pass	pass
FD01873971.rev.paired	FD01873971.rev.paired	Original	Conventional base calls	Sanger / Illumina 1.9	482422	0	0-143	49	74.7854	139.761	pass	pass	warn	pass	fail	warn	pass	fail	pass	pass	pass
FD01873972.for.paired	FD01873972.for.paired	Original	Conventional base calls	Sanger / Illumina 1.9	356847	0	0-143	50	73.435	140.852	pass	pass	pass	pass	fail	fail	pass	fail	pass	pass	pass
FD01873972.rev.paired	FD01873972.rev.paired	Original	Conventional base calls	Sanger / Illumina 1.9	356847	0	0-143	49	75.0125	139.739	pass	pass	warn	pass	fail	warn	pass	fail	pass	pass	pass
FD01873973.for.paired	FD01873973.for.paired	Original	Conventional base calls	Sanger / Illumina 1.9	565952	0	0-143	49	67.4278	141.03	pass	pass	pass	pass	fail	warn	pass	fail	warn	pass	pass
FD01873973.rev.paired	FD01873973.rev.paired	Original	Conventional base calls	Sanger / Illumina 1.9	565952	0	0-143	49	69.1555	139.891	pass	pass	warn	pass	fail	warn	pass	fail	warn	pass	pass
FD01873974.for.paired	FD01873974.for.paired	Original	Conventional base calls	Sanger / Illumina 1.9	626878	0	0-143	49	59.2064	141.083	pass	pass	pass	pass	fail	fail	pass	fail	warn	pass	pass
FD01873974.rev.paired	FD01873974.rev.paired	Original	Conventional base calls	Sanger / Illumina 1.9	626878	0	0-143	49	60.9201	139.952	pass	pass	warn	pass	fail	warn	pass	fail	warn	pass	pass
FD01873975.for.paired	FD01873975.for.paired	Original	Conventional base calls	Sanger / Illumina 1.9	570309	0	0-143	50	73.5037	140.785	pass	pass	pass	pass	fail	fail	pass	fail	pass	pass	pass
FD01873975.rev.paired	FD01873975.rev.paired	Original	Conventional base calls	Sanger / Illumina 1.9	570309	0	0-143	50	74.8626	139.574	pass	pass	warn	pass	fail	warn	pass	fail	pass	pass	pass
FD01873976.for.paired	FD01873976.for.paired	Original	Conventional base calls	Sanger / Illumina 1.9	592362	0	0-143	50	73.823	141.23	pass	pass	pass	pass	fail	warn	pass	fail	pass	pass	pass
FD01873976.rev.paired	FD01873976.rev.paired	Original	Conventional base calls	Sanger / Illumina 1.9	592362	0	0-143	50	75.7495	140.011	pass	pass	warn	pass	fail	warn	pass	fail	pass	pass	pass
FD01873978.for.paired	FD01873978.for.paired	Original	Conventional base calls	Sanger / Illumina 1.9	499634	0	0-143	50	73.26	140.712	pass	pass	pass	pass	fail	fail	pass	fail	pass	pass	pass
FD01873978.rev.paired	FD01873978.rev.paired	Original	Conventional base calls	Sanger / Illumina 1.9	499634	0	0-143	50	75.0475	139.726	pass	pass	warn	pass	fail	warn	pass	fail	pass	pass	pass
FD01873979.for.paired	FD01873979.for.paired	Original	Conventional base calls	Sanger / Illumina 1.9	591310	0	0-143	49	71.1965	140.919	pass	pass	pass	pass	fail	fail	pass	fail	pass	pass	pass
FD01873979.rev.paired	FD01873979.rev.paired	Original	Conventional base calls	Sanger / Illumina 1.9	591310	0	0-143	49	72.7727	139.881	pass	pass	warn	pass	fail	warn	pass	fail	pass	pass	pass
FD01873980.for.paired	FD01873980.for.paired	Original	Conventional base calls	Sanger / Illumina 1.9	522866	0	0-143	50	76.4123	140.917	pass	pass	pass	pass	fail	warn	pass	fail	pass	pass	pass
FD01873980.rev.paired	FD01873980.rev.paired	Original	Conventional base calls	Sanger / Illumina 1.9	522866	0	0-143	50	77.8796	139.776	pass	pass	warn	pass	fail	warn	pass	fail	pass	pass	pass
FD01873981.for.paired	FD01873981.for.paired	Original	Conventional base calls	Sanger / Illumina 1.9	523550	0	0-143	49	72.0008	141.289	pass	pass	pass	pass	fail	warn	pass	fail	pass	pass	pass
FD01873981.rev.paired	FD01873981.rev.paired	Original	Conventional base calls	Sanger / Illumina 1.9	523550	0	0-143	49	73.4786	140.12	pass	pass	warn	pass	fail	warn	pass	fail	pass	pass	pass
FD01873982.for.paired	FD01873982.for.paired	Original	Conventional base calls	Sanger / Illumina 1.9	540446	0	0-143	50	76.2219	141.128	pass	pass	pass	pass	fail	warn	pass	fail	pass	pass	pass
FD01873982.rev.paired	FD01873982.rev.paired	Original	Conventional base calls	Sanger / Illumina 1.9	540446	0	0-143	50	77.6001	140.017	pass	pass	warn	pass	fail	warn	pass	fail	pass	pass	pass
FD01873983.for.paired	FD01873983.for.paired	Original	Conventional base calls	Sanger / Illumina 1.9	483133	0	0-143	50	71.7561	140.624	pass	pass	pass	pass	fail	fail	pass	fail	pass	pass	pass
FD01873983.rev.paired	FD01873983.rev.paired	Original	Conventional base calls	Sanger / Illumina 1.9	483133	0	0-143	50	73.1517	139.673	pass	pass	warn	pass	fail	warn	pass	fail	pass	pass	pass
FD01873986.for.paired	FD01873986.for.paired	Original	Conventional base calls	Sanger / Illumina 1.9	477858	0	0-143	50	78.1588	140.079	pass	pass	pass	pass	fail	warn	pass	fail	pass	pass	pass
FD01873986.rev.paired	FD01873986.rev.paired	Original	Conventional base calls	Sanger / Illumina 1.9	477858	0	0-143	50	79.7427	139.707	pass	pass	warn	pass	fail	warn	pass	fail	pass	pass	pass
FD01873987.for.paired	FD01873987.for.paired	Original	Conventional base calls	Sanger / Illumina 1.9	527750	0	0-143	50	76.7508	141.137	pass	pass	pass	pass	fail	fail	pass	fail	pass	pass	pass
FD01873987.rev.paired	FD01873987.rev.paired	Original	Conventional base calls	Sanger / Illumina 1.9	527750	0	0-143	49	78.3506	140.017	pass	pass	warn	pass	fail	warn	pass	fail	pass	pass	pass
FD01873988.for.paired	FD01873988.for.paired	Original	Conventional base calls	Sanger / Illumina 1.9	528776	0	0-143	50	77.2419	141.203	pass	pass	pass	pass	fail	fail	pass	fail	pass	pass	pass
FD01873988.rev.paired	FD01873988.rev.paired	Original	Conventional base calls	Sanger / Illumina 1.9	528776	0	0-143	50	78.8243	140.001	pass	pass	warn	pass	fail	warn	pass	fail	pass	pass	pass
FD01873989.for.paired	FD01873989.for.paired	Original	Conventional base calls	Sanger / Illumina 1.9	488090	0	0-143	50	71.0911	140.864	pass	pass	pass	pass	fail	fail	pass	fail	pass	pass	pass
FD01873989.rev.paired	FD01873989.rev.paired	Original	Conventional base calls	Sanger / Illumina 1.9	488090	0	0-143	50	72.7119	139.792	pass	pass	warn	pass	fail	warn	pass	fail	pass	pass	pass
FD01873990.for.paired	FD01873990.for.paired	Original	Conventional base calls	Sanger / Illumina 1.9	540181	0	0-143	50	76.7597	141.261	pass	pass	pass	pass	fail	fail	pass	fail	pass	pass	pass
FD01873990.rev.paired	FD01873990.rev.paired	Original	Conventional base calls	Sanger / Illumina 1.9	540181	0	0-143	50	77.8904	140.014	pass	pass	warn	pass	fail	fail	pass	fail	pass	pass	pass
FD01873991.for.paired	FD01873991.for.paired	Original	Conventional base calls	Sanger / Illumina 1.9	765711	0	0-143	50	65.6174	141.027	pass	pass	pass	pass	fail	fail	pass	fail	warn	pass	pass
FD01873991.rev.paired	FD01873991.rev.paired	Original	Conventional base calls	Sanger / Illumina 1.9	765711	0	0-143	50	67.1884	139.919	pass	pass	warn	pass	fail	warn	pass	fail	warn	pass	pass
FD01873994.for.paired	FD01873994.for.paired	Original	Conventional base calls	Sanger / Illumina 1.9	312052	0	0-143	50	82.0545	140.86	pass	pass	pass	pass	fail	warn	pass	fail	pass	pass	pass
FD01873994.rev.paired	FD01873994.rev.paired	Original	Conventional base calls	Sanger / Illumina 1.9	312052	0	0-143	50	83.1549	139.825	pass	pass	warn	pass	fail	warn	pass	fail	pass	pass	pass
FD01873995.for.paired	FD01873995.for.paired	Original	Conventional base calls	Sanger / Illumina 1.9	502579	0	0-143	49	69.0929	140.915	pass	pass	pass	pass	fail	fail	pass	fail	warn	pass	pass
FD01873995.rev.paired	FD01873995.rev.paired	Original	Conventional base calls	Sanger / Illumina 1.9	502579	0	0-143	49	70.8272	139.875	pass	pass	warn	pass	fail	warn	pass	fail	pass	pass	pass
FD01873996.for.paired	FD01873996.for.paired	Original	Conventional base calls	Sanger / Illumina 1.9	636828	0	0-143	49	67.199	141.056	pass	pass	pass	pass	fail	warn	pass	fail	warn	pass	pass
FD01873996.rev.paired	FD01873996.rev.paired	Original	Conventional base calls	Sanger / Illumina 1.9	636828	0	0-143	49	68.9428	139.962	pass	pass	warn	pass	fail	warn	pass	fail	warn	pass	pass
FD01873997.for.paired	FD01873997.for.paired	Original	Conventional base calls	Sanger / Illumina 1.9	236061	0	0-143	49	60.488	141.378	pass	pass	pass	pass	fail	warn	pass	fail	warn	warn	pass
FD01873997.rev.paired	FD01873997.rev.paired	Original	Conventional base calls	Sanger / Illumina 1.9	236061	0	0-143	49	62.8887	140.214	pass	pass	warn	pass	fail	fail	pass	fail	warn	warn	pass
FD01873998.for.paired	FD01873998.for.paired	Original	Conventional base calls	Sanger / Illumina 1.9	592944	0	0-143	50	73.0973	141.23	pass	pass	pass	pass	fail	fail	pass	fail	pass	pass	pass
FD01873998.rev.paired	FD01873998.rev.paired	Original	Conventional base calls	Sanger / Illumina 1.9	592944	0	0-143	49	74.4192	140.108	pass	pass	warn	pass	fail	warn	pass	fail	pass	pass	pass
FD01873999.for.paired	FD01873999.for.paired	Original	Conventional base calls	Sanger / Illumina 1.9	495090	0	0-143	50	72.0159	141.223	pass	pass	pass	pass	fail	warn	pass	fail	pass	pass	pass
FD01873999.rev.paired	FD01873999.rev.paired	Original	Conventional base calls	Sanger / Illumina 1.9	495090	0	0-143	49	73.5702	140.044	pass	pass	warn	pass	fail	fail	pass	fail	pass	pass	pass
FD01874098.for.paired	FD01874098.for.paired	Original	Conventional base calls	Sanger / Illumina 1.9	440819	0	0-143	50	80.0329	139.438	pass	pass	pass	pass	fail	fail	pass	fail	pass	pass	pass
FD01874098.rev.paired	FD01874098.rev.paired	Original	Conventional base calls	Sanger / Illumina 1.9	440819	0	0-143	50	81.2759	139.357	pass	pass	warn	pass	warn	warn	pass	fail	pass	pass	pass
FD01874099.for.paired	FD01874099.for.paired	Original	Conventional base calls	Sanger / Illumina 1.9	501908	0	0-143	50	82.3056	141.076	pass	pass	pass	pass	warn	warn	pass	fail	pass	pass	pass
FD01874099.rev.paired	FD01874099.rev.paired	Original	Conventional base calls	Sanger / Illumina 1.9	501908	0	0-143	50	83.0317	140.036	pass	pass	warn	pass	fail	warn	pass	fail	pass	pass	pass
FD01874100.for.paired	FD01874100.for.paired	Original	Conventional base calls	Sanger / Illumina 1.9	480585	0	0-143	51	78.8208	140.426	pass	pass	pass	pass	warn	warn	pass	fail	pass	pass	pass
FD01874100.rev.paired	FD01874100.rev.paired	Original	Conventional base calls	Sanger / Illumina 1.9	480585	0	0-143	51	79.6896	139.643	pass	pass	warn	pass	fail	warn	pass	fail	pass	pass	pass
FD01874101.for.paired	FD01874101.for.paired	Original	Conventional base calls	Sanger / Illumina 1.9	455063	0	0-143	50	78.8911	140.124	pass	pass	pass	pass	fail	fail	pass	fail	pass	warn	pass
FD01874101.rev.paired	FD01874101.rev.paired	Original	Conventional base calls	Sanger / Illumina 1.9	455063	0	0-143	50	79.7772	139.425	pass	pass	warn	pass	fail	warn	pass	fail	pass	pass	pass
FD01874102.for.paired	FD01874102.for.paired	Original	Conventional base calls	Sanger / Illumina 1.9	477574	0	0-143	50	83.9793	140.682	pass	pass	pass	pass	fail	warn	pass	fail	pass	pass	pass
FD01874102.rev.paired	FD01874102.rev.paired	Original	Conventional base calls	Sanger / Illumina 1.9	477574	0	0-143	50	84.8722	139.724	pass	pass	warn	pass	fail	warn	pass	fail	pass	pass	pass
FD01874103.for.paired	FD01874103.for.paired	Original	Conventional base calls	Sanger / Illumina 1.9	567580	0	0-143	50	82.7678	140.468	pass	pass	pass	pass	warn	warn	pass	fail	pass	pass	pass
FD01874103.rev.paired	FD01874103.rev.paired	Original	Conventional base calls	Sanger / Illumina 1.9	567580	0	0-143	50	83.7473	139.616	pass	pass	warn	pass	warn	warn	pass	fail	pass	pass	pass
FD01874104.for.paired	FD01874104.for.paired	Original	Conventional base calls	Sanger / Illumina 1.9	507580	0	0-143	50	73.7382	140.722	pass	pass	pass	pass	fail	warn	pass	fail	pass	pass	pass
FD01874104.rev.paired	FD01874104.rev.paired	Original	Conventional base calls	Sanger / Illumina 1.9	507580	0	0-143	50	75.032	139.726	pass	pass	warn	pass	warn	warn	pass	fail	pass	pass	pass
FD01874105.for.paired	FD01874105.for.paired	Original	Conventional base calls	Sanger / Illumina 1.9	482201	0	0-143	50	78.1911	141.042	pass	pass	pass	pass	fail	warn	pass	fail	pass	pass	pass
FD01874105.rev.paired	FD01874105.rev.paired	Original	Conventional base calls	Sanger / Illumina 1.9	482201	0	0-143	50	79.4999	139.966	pass	pass	warn	pass	fail	warn	pass	fail	pass	pass	pass
FD01874106.for.paired	FD01874106.for.paired	Original	Conventional base calls	Sanger / Illumina 1.9	472075	0	0-143	50	80.0533	139.838	pass	pass	warn	pass	fail	warn	pass	fail	pass	pass	pass
FD01874106.rev.paired	FD01874106.rev.paired	Original	Conventional base calls	Sanger / Illumina 1.9	472075	0	0-143	50	81.5101	139.565	pass	pass	warn	pass	warn	warn	pass	fail	pass	pass	pass
FD01874107.for.paired	FD01874107.for.paired	Original	Conventional base calls	Sanger / Illumina 1.9	566998	0	0-143	50	78.4863	140.772	pass	pass	pass	pass	fail	warn	pass	fail	pass	pass	pass
FD01874107.rev.paired	FD01874107.rev.paired	Original	Conventional base calls	Sanger / Illumina 1.9	566998	0	0-143	50	79.5464	139.845	pass	pass	warn	pass	fail	warn	pass	fail	pass	pass	pass
FD01874108.for.paired	FD01874108.for.paired	Original	Conventional base calls	Sanger / Illumina 1.9	552723	0	0-143	50	78.3174	140.122	pass	pass	pass	pass	fail	warn	pass	fail	pass	pass	pass
FD01874108.rev.paired	FD01874108.rev.paired	Original	Conventional base calls	Sanger / Illumina 1.9	552723	0	0-143	50	79.4321	139.642	pass	pass	warn	pass	fail	warn	pass	fail	pass	pass	pass
FD01874109.for.paired	FD01874109.for.paired	Original	Conventional base calls	Sanger / Illumina 1.9	498312	0	0-143	50	78.3078	140.621	pass	pass	pass	pass	fail	warn	pass	fail	pass	pass	pass
FD01874109.rev.paired	FD01874109.rev.paired	Original	Conventional base calls	Sanger / Illumina 1.9	498312	0	0-143	50	79.701	139.718	pass	pass	warn	pass	fail	warn	pass	fail	pass	pass	pass
FD01874110.for.paired	FD01874110.for.paired	Original	Conventional base calls	Sanger / Illumina 1.9	511511	0	0-143	50	83.6101	141.054	pass	pass	pass	pass	fail	warn	pass	fail	pass	pass	pass
FD01874110.rev.paired	FD01874110.rev.paired	Original	Conventional base calls	Sanger / Illumina 1.9	511511	0	0-143	50	84.5118	140.055	pass	pass	warn	pass	warn	warn	pass	fail	pass	pass	pass
FD01874111.for.paired	FD01874111.for.paired	Original	Conventional base calls	Sanger / Illumina 1.9	577974	0	0-143	50	80.7729	140.691	pass	pass	pass	pass	fail	warn	pass	fail	pass	pass	pass
FD01874111.rev.paired	FD01874111.rev.paired	Original	Conventional base calls	Sanger / Illumina 1.9	577974	0	0-143	50	81.7211	139.75	pass	pass	warn	pass	fail	warn	pass	fail	pass	pass	pass
FD01874112.for.paired	FD01874112.for.paired	Original	Conventional base calls	Sanger / Illumina 1.9	80426	0	0-143	51	87.2703	140.39	pass	pass	pass	pass	fail	warn	pass	fail	pass	pass	pass
FD01874112.rev.paired	FD01874112.rev.paired	Original	Conventional base calls	Sanger / Illumina 1.9	80426	0	0-143	51	88.173	139.518	pass	pass	warn	pass	warn	warn	pass	fail	pass	pass	pass
FD01874113.for.paired	FD01874113.for.paired	Original	Conventional base calls	Sanger / Illumina 1.9	490035	0	0-143	50	76.261	140.92	pass	pass	pass	pass	fail	warn	pass	fail	pass	pass	pass
FD01874113.rev.paired	FD01874113.rev.paired	Original	Conventional base calls	Sanger / Illumina 1.9	490035	0	0-143	50	77.5925	139.865	pass	pass	warn	pass	warn	warn	pass	fail	pass	pass	pass
FD01874114.for.paired	FD01874114.for.paired	Original	Conventional base calls	Sanger / Illumina 1.9	488266	0	0-143	50	77.835	140.704	pass	pass	pass	pass	fail	warn	pass	fail	pass	pass	pass
FD01874114.rev.paired	FD01874114.rev.paired	Original	Conventional base calls	Sanger / Illumina 1.9	488266	0	0-143	49	79.1127	139.854	pass	pass	warn	pass	fail	warn	pass	fail	pass	pass	pass
FD01874115.for.paired	FD01874115.for.paired	Original	Conventional base calls	Sanger / Illumina 1.9	532799	0	0-143	50	81.6184	140.706	pass	pass	pass	pass	fail	warn	pass	fail	pass	pass	pass
FD01874115.rev.paired	FD01874115.rev.paired	Original	Conventional base calls	Sanger / Illumina 1.9	532799	0	0-143	50	82.9418	139.76	pass	pass	warn	pass	warn	warn	pass	fail	pass	pass	pass
FD01874116.for.paired	FD01874116.for.paired	Original	Conventional base calls	Sanger / Illumina 1.9	438209	0	0-143	50	81.3109	140.787	pass	pass	pass	pass	fail	warn	pass	fail	pass	pass	pass
FD01874116.rev.paired	FD01874116.rev.paired	Original	Conventional base calls	Sanger / Illumina 1.9	438209	0	0-143	50	82.585	139.834	pass	pass	warn	pass	warn	warn	pass	fail	pass	pass	pass
FD01874117.for.paired	FD01874117.for.paired	Original	Conventional base calls	Sanger / Illumina 1.9	583803	0	0-143	50	76.3083	140.771	pass	pass	pass	pass	fail	warn	pass	fail	pass	pass	pass
FD01874117.rev.paired	FD01874117.rev.paired	Original	Conventional base calls	Sanger / Illumina 1.9	583803	0	0-143	50	77.6142	139.8	pass	pass	warn	pass	fail	warn	pass	fail	pass	pass	pass
FD01874118.for.paired	FD01874118.for.paired	Original	Conventional base calls	Sanger / Illumina 1.9	438700	0	0-143	50	80.9261	140.859	pass	pass	pass	pass	fail	warn	pass	fail	pass	pass	pass
FD01874118.rev.paired	FD01874118.rev.paired	Original	Conventional base calls	Sanger / Illumina 1.9	438700	0	0-143	50	82.093	139.893	pass	pass	warn	pass	warn	warn	pass	fail	pass	pass	pass
FD01874119.for.paired	FD01874119.for.paired	Original	Conventional base calls	Sanger / Illumina 1.9	463714	0	0-143	50	84.8186	140.092	pass	pass	pass	pass	fail	warn	pass	fail	pass	warn	pass
FD01874119.rev.paired	FD01874119.rev.paired	Original	Conventional base calls	Sanger / Illumina 1.9	463714	0	0-143	50	85.7424	139.316	pass	pass	warn	pass	warn	warn	pass	fail	pass	pass	pass
FD01874120.for.paired	FD01874120.for.paired	Original	Conventional base calls	Sanger / Illumina 1.9	529982	0	0-143	50	75.4285	140.964	pass	pass	pass	pass	fail	warn	pass	fail	pass	pass	pass
FD01874120.rev.paired	FD01874120.rev.paired	Original	Conventional base calls	Sanger / Illumina 1.9	529982	0	0-143	50	76.6719	139.96	pass	pass	warn	pass	fail	warn	pass	fail	pass	pass	pass
FD01874121.for.paired	FD01874121.for.paired	Original	Conventional base calls	Sanger / Illumina 1.9	480427	0	0-143	50	76.0407	140.928	pass	pass	pass	pass	fail	warn	pass	fail	pass	pass	pass
FD01874121.rev.paired	FD01874121.rev.paired	Original	Conventional base calls	Sanger / Illumina 1.9	480427	0	0-143	50	77.5893	139.868	pass	pass	warn	pass	fail	warn	pass	fail	pass	pass	pass
FD01874122.for.paired	FD01874122.for.paired	Original	Conventional base calls	Sanger / Illumina 1.9	486462	0	0-143	49	74.7499	140.518	pass	pass	warn	pass	fail	fail	pass	fail	pass	pass	pass
FD01874122.rev.paired	FD01874122.rev.paired	Original	Conventional base calls	Sanger / Illumina 1.9	486462	0	0-143	49	76.1665	139.963	pass	pass	warn	pass	warn	warn	pass	fail	pass	pass	pass
FD01874123.for.paired	FD01874123.for.paired	Original	Conventional base calls	Sanger / Illumina 1.9	504268	0	0-143	51	75.0804	140.993	pass	pass	pass	pass	fail	warn	pass	fail	pass	pass	pass
FD01874123.rev.paired	FD01874123.rev.paired	Original	Conventional base calls	Sanger / Illumina 1.9	504268	0	0-143	50	76.2305	140.042	pass	pass	warn	pass	fail	warn	pass	fail	pass	pass	pass
FD01874124.for.paired	FD01874124.for.paired	Original	Conventional base calls	Sanger / Illumina 1.9	453669	0	0-143	50	83.8729	140.586	pass	pass	pass	pass	fail	warn	pass	fail	pass	pass	pass
FD01874124.rev.paired	FD01874124.rev.paired	Original	Conventional base calls	Sanger / Illumina 1.9	453669	0	0-143	50	84.8653	139.787	pass	pass	warn	pass	fail	warn	pass	fail	pass	pass	pass
FD01874125.for.paired	FD01874125.for.paired	Original	Conventional base calls	Sanger / Illumina 1.9	470040	0	0-143	50	82.004	140.945	pass	pass	pass	pass	fail	warn	pass	fail	pass	pass	pass
FD01874125.rev.paired	FD01874125.rev.paired	Original	Conventional base calls	Sanger / Illumina 1.9	470040	0	0-143	50	83.0162	139.984	pass	pass	warn	pass	fail	warn	pass	fail	pass	pass	pass
FD01874126.for.paired	FD01874126.for.paired	Original	Conventional base calls	Sanger / Illumina 1.9	531694	0	0-143	50	81.1445	140.838	pass	pass	pass	pass	warn	warn	pass	fail	pass	pass	pass
FD01874126.rev.paired	FD01874126.rev.paired	Original	Conventional base calls	Sanger / Illumina 1.9	531694	0	0-143	50	82.0054	139.948	pass	pass	warn	pass	warn	warn	pass	fail	pass	pass	pass
FD01874127.for.paired	FD01874127.for.paired	Original	Conventional base calls	Sanger / Illumina 1.9	448578	0	0-143	50	84.2282	140.613	pass	pass	pass	pass	fail	warn	pass	fail	pass	pass	pass
FD01874127.rev.paired	FD01874127.rev.paired	Original	Conventional base calls	Sanger / Illumina 1.9	448578	0	0-143	50	85.1992	139.79	pass	pass	warn	pass	fail	warn	pass	fail	pass	pass	pass
FD01874128.for.paired	FD01874128.for.paired	Original	Conventional base calls	Sanger / Illumina 1.9	532306	0	0-143	50	74.0032	140.446	pass	pass	pass	pass	fail	fail	pass	fail	pass	pass	pass
FD01874128.rev.paired	FD01874128.rev.paired	Original	Conventional base calls	Sanger / Illumina 1.9	532306	0	0-143	50	75.5634	139.473	pass	pass	warn	pass	fail	warn	pass	fail	pass	pass	pass
FD01874129.for.paired	FD01874129.for.paired	Original	Conventional base calls	Sanger / Illumina 1.9	638589	0	0-143	50	73.6796	140.934	pass	pass	pass	pass	fail	warn	pass	fail	pass	pass	pass
FD01874129.rev.paired	FD01874129.rev.paired	Original	Conventional base calls	Sanger / Illumina 1.9	638589	0	0-143	50	74.8655	139.95	pass	pass	warn	pass	fail	warn	pass	fail	pass	pass	pass
FD01874130.for.paired	FD01874130.for.paired	Original	Conventional base calls	Sanger / Illumina 1.9	478455	0	0-143	50	78.935	140.983	pass	pass	pass	pass	fail	warn	pass	fail	pass	pass	pass
FD01874130.rev.paired	FD01874130.rev.paired	Original	Conventional base calls	Sanger / Illumina 1.9	478455	0	0-143	50	80.2585	139.905	pass	pass	warn	pass	fail	warn	pass	fail	pass	pass	pass
FD01874131.for.paired	FD01874131.for.paired	Original	Conventional base calls	Sanger / Illumina 1.9	523859	0	0-143	50	80.399	140.283	pass	pass	pass	pass	fail	warn	pass	fail	pass	pass	pass
FD01874131.rev.paired	FD01874131.rev.paired	Original	Conventional base calls	Sanger / Illumina 1.9	523859	0	0-143	50	81.6524	139.459	pass	pass	warn	pass	fail	warn	pass	fail	pass	pass	pass
FD01874132.for.paired	FD01874132.for.paired	Original	Conventional base calls	Sanger / Illumina 1.9	449592	0	0-143	50	82.7061	140.672	pass	pass	pass	pass	fail	warn	pass	fail	pass	pass	pass
FD01874132.rev.paired	FD01874132.rev.paired	Original	Conventional base calls	Sanger / Illumina 1.9	449592	0	0-143	50	84.0566	139.751	pass	pass	warn	pass	warn	warn	pass	fail	pass	pass	pass
FD01874133.for.paired	FD01874133.for.paired	Original	Conventional base calls	Sanger / Illumina 1.9	554046	0	0-143	50	81.2774	140.716	pass	pass	pass	pass	fail	warn	pass	fail	pass	pass	pass
FD01874133.rev.paired	FD01874133.rev.paired	Original	Conventional base calls	Sanger / Illumina 1.9	554046	0	0-143	50	82.4635	139.834	pass	pass	warn	pass	fail	warn	pass	fail	pass	pass	pass
FD01874134.for.paired	FD01874134.for.paired	Original	Conventional base calls	Sanger / Illumina 1.9	505443	0	0-143	50	79.6517	140.299	pass	pass	pass	pass	fail	warn	pass	fail	pass	pass	pass
FD01874134.rev.paired	FD01874134.rev.paired	Original	Conventional base calls	Sanger / Illumina 1.9	505443	0	0-143	50	80.8288	139.652	pass	pass	warn	pass	fail	warn	pass	fail	pass	pass	pass
FD01874135.for.paired	FD01874135.for.paired	Original	Conventional base calls	Sanger / Illumina 1.9	455649	0	0-143	50	84.4256	140.469	pass	pass	pass	pass	warn	warn	pass	fail	pass	pass	pass
FD01874135.rev.paired	FD01874135.rev.paired	Original	Conventional base calls	Sanger / Illumina 1.9	455649	0	0-143	50	85.5136	139.692	pass	pass	warn	pass	warn	warn	pass	fail	pass	pass	pass
FD01874136.for.paired	FD01874136.for.paired	Original	Conventional base calls	Sanger / Illumina 1.9	509372	0	0-143	50	76.4414	139.584	pass	pass	pass	pass	fail	warn	pass	fail	pass	pass	pass
FD01874136.rev.paired	FD01874136.rev.paired	Original	Conventional base calls	Sanger / Illumina 1.9	509372	0	0-143	50	77.6512	139.495	pass	pass	warn	pass	warn	warn	pass	fail	pass	pass	pass
FD01874137.for.paired	FD01874137.for.paired	Original	Conventional base calls	Sanger / Illumina 1.9	466046	0	0-143	50	72.1939	140.285	pass	pass	pass	pass	fail	fail	pass	fail	pass	pass	pass
FD01874137.rev.paired	FD01874137.rev.paired	Original	Conventional base calls	Sanger / Illumina 1.9	466046	0	0-143	50	73.3916	139.54	pass	pass	warn	pass	fail	warn	pass	fail	pass	pass	pass
FD01874138.for.paired	FD01874138.for.paired	Original	Conventional base calls	Sanger / Illumina 1.9	454141	0	0-143	50	80.9549	140.842	pass	pass	pass	pass	fail	warn	pass	fail	pass	pass	pass
FD01874138.rev.paired	FD01874138.rev.paired	Original	Conventional base calls	Sanger / Illumina 1.9	454141	0	0-143	50	82.0507	139.961	pass	pass	warn	pass	warn	warn	pass	fail	pass	pass	pass
FD01874139.for.paired	FD01874139.for.paired	Original	Conventional base calls	Sanger / Illumina 1.9	506610	0	0-143	50	80.1675	140.848	pass	pass	pass	pass	fail	warn	pass	fail	pass	pass	pass
FD01874139.rev.paired	FD01874139.rev.paired	Original	Conventional base calls	Sanger / Illumina 1.9	506610	0	0-143	50	81.187	139.941	pass	pass	warn	pass	fail	warn	pass	fail	pass	pass	pass
FD01874140.for.paired	FD01874140.for.paired	Original	Conventional base calls	Sanger / Illumina 1.9	442772	0	0-143	50	82.5292	139.986	pass	pass	warn	pass	fail	warn	pass	fail	pass	pass	pass
FD01874140.rev.paired	FD01874140.rev.paired	Original	Conventional base calls	Sanger / Illumina 1.9	442772	0	0-143	50	83.5666	139.484	pass	pass	warn	pass	fail	warn	pass	fail	pass	pass	pass
FD01874141.for.paired	FD01874141.for.paired	Original	Conventional base calls	Sanger / Illumina 1.9	457266	0	0-143	51	78.4905	140.021	pass	pass	pass	pass	fail	warn	pass	fail	pass	pass	pass
FD01874141.rev.paired	FD01874141.rev.paired	Original	Conventional base calls	Sanger / Illumina 1.9	457266	0	0-143	51	79.7553	139.697	pass	pass	warn	pass	warn	warn	pass	fail	pass	pass	pass
FD01874142.for.paired	FD01874142.for.paired	Original	Conventional base calls	Sanger / Illumina 1.9	561730	0	0-143	51	82.0356	139.99	pass	pass	pass	pass	fail	fail	pass	fail	pass	warn	pass
FD01874142.rev.paired	FD01874142.rev.paired	Original	Conventional base calls	Sanger / Illumina 1.9	561730	0	0-143	51	82.9427	139.345	pass	pass	warn	pass	warn	warn	pass	fail	pass	pass	pass
FD01874143.for.paired	FD01874143.for.paired	Original	Conventional base calls	Sanger / Illumina 1.9	589218	0	0-143	50	74.3955	141.017	pass	pass	pass	pass	fail	warn	pass	fail	pass	pass	pass
FD01874143.rev.paired	FD01874143.rev.paired	Original	Conventional base calls	Sanger / Illumina 1.9	589218	0	0-143	50	75.6714	139.968	pass	pass	warn	pass	fail	warn	pass	fail	pass	pass	pass
FD01874144.for.paired	FD01874144.for.paired	Original	Conventional base calls	Sanger / Illumina 1.9	638389	0	0-143	49	73.713	141.018	pass	pass	pass	pass	fail	warn	pass	fail	pass	pass	pass
FD01874144.rev.paired	FD01874144.rev.paired	Original	Conventional base calls	Sanger / Illumina 1.9	638389	0	0-143	49	74.9092	140.017	pass	pass	warn	pass	fail	warn	pass	fail	pass	pass	pass
FD01874145.for.paired	FD01874145.for.paired	Original	Conventional base calls	Sanger / Illumina 1.9	485466	0	0-143	50	70.7385	140.943	pass	pass	pass	pass	fail	fail	pass	fail	pass	pass	pass
FD01874145.rev.paired	FD01874145.rev.paired	Original	Conventional base calls	Sanger / Illumina 1.9	485466	0	0-143	50	72.0549	139.939	pass	pass	warn	pass	fail	warn	pass	fail	pass	pass	pass
FD01874146.for.paired	FD01874146.for.paired	Original	Conventional base calls	Sanger / Illumina 1.9	497601	0	0-143	50	80.015	140.862	pass	pass	pass	pass	fail	warn	pass	fail	pass	pass	pass
FD01874146.rev.paired	FD01874146.rev.paired	Original	Conventional base calls	Sanger / Illumina 1.9	497601	0	0-143	50	81.2681	139.924	pass	pass	warn	pass	fail	warn	pass	fail	pass	pass	pass
FD01874147.for.paired	FD01874147.for.paired	Original	Conventional base calls	Sanger / Illumina 1.9	458435	0	0-143	51	82.1216	140.602	pass	pass	pass	pass	fail	warn	pass	fail	pass	pass	pass
FD01874147.rev.paired	FD01874147.rev.paired	Original	Conventional base calls	Sanger / Illumina 1.9	458435	0	0-143	50	83.0627	139.731	pass	pass	warn	pass	fail	warn	pass	fail	pass	pass	pass
FD01874148.for.paired	FD01874148.for.paired	Original	Conventional base calls	Sanger / Illumina 1.9	460293	0	0-143	50	81.8075	140.914	pass	pass	pass	pass	fail	warn	pass	fail	pass	pass	pass
FD01874148.rev.paired	FD01874148.rev.paired	Original	Conventional base calls	Sanger / Illumina 1.9	460293	0	0-143	50	83.1165	139.903	pass	pass	warn	pass	fail	warn	pass	fail	pass	pass	pass
FD01874149.for.paired	FD01874149.for.paired	Original	Conventional base calls	Sanger / Illumina 1.9	578993	0	0-143	50	80.0382	140.231	pass	pass	pass	pass	fail	warn	pass	fail	pass	warn	pass
FD01874149.rev.paired	FD01874149.rev.paired	Original	Conventional base calls	Sanger / Illumina 1.9	578993	0	0-143	50	80.9197	139.451	pass	pass	warn	pass	fail	warn	pass	fail	pass	pass	pass
FD01874150.for.paired	FD01874150.for.paired	Original	Conventional base calls	Sanger / Illumina 1.9	475340	0	0-143	50	82.208	140.905	pass	pass	pass	pass	fail	warn	pass	fail	pass	pass	pass
FD01874150.rev.paired	FD01874150.rev.paired	Original	Conventional base calls	Sanger / Illumina 1.9	475340	0	0-143	50	83.057	139.908	pass	pass	warn	pass	fail	warn	pass	fail	pass	pass	pass
FD01874151.for.paired	FD01874151.for.paired	Original	Conventional base calls	Sanger / Illumina 1.9	505787	0	0-143	50	73.6364	140.927	pass	pass	pass	pass	fail	fail	pass	fail	pass	pass	pass
FD01874151.rev.paired	FD01874151.rev.paired	Original	Conventional base calls	Sanger / Illumina 1.9	505787	0	0-143	50	75.0081	139.925	pass	pass	warn	pass	fail	warn	pass	fail	pass	pass	pass
FD01874152.for.paired	FD01874152.for.paired	Original	Conventional base calls	Sanger / Illumina 1.9	473803	0	0-143	50	77.7596	140.803	pass	pass	pass	pass	fail	warn	pass	fail	pass	pass	pass
FD01874152.rev.paired	FD01874152.rev.paired	Original	Conventional base calls	Sanger / Illumina 1.9	473803	0	0-143	50	79.0109	139.845	pass	pass	warn	pass	fail	warn	pass	fail	pass	pass	pass
FD01874153.for.paired	FD01874153.for.paired	Original	Conventional base calls	Sanger / Illumina 1.9	438925	0	0-143	50	77.57	140.089	pass	pass	pass	pass	fail	warn	pass	fail	pass	pass	pass
FD01874153.rev.paired	FD01874153.rev.paired	Original	Conventional base calls	Sanger / Illumina 1.9	438925	0	0-143	50	78.8728	139.702	pass	pass	warn	pass	fail	warn	pass	fail	pass	pass	pass
FD01874154.for.paired	FD01874154.for.paired	Original	Conventional base calls	Sanger / Illumina 1.9	423253	0	0-143	50	80.0463	140.915	pass	pass	pass	pass	fail	warn	pass	fail	pass	pass	pass
FD01874154.rev.paired	FD01874154.rev.paired	Original	Conventional base calls	Sanger / Illumina 1.9	423253	0	0-143	50	81.2114	140.027	pass	pass	warn	pass	warn	warn	pass	fail	pass	pass	pass
FD01874155.for.paired	FD01874155.for.paired	Original	Conventional base calls	Sanger / Illumina 1.9	401314	0	0-143	51	83.8241	140.499	pass	pass	pass	pass	fail	warn	pass	fail	pass	pass	pass
FD01874155.rev.paired	FD01874155.rev.paired	Original	Conventional base calls	Sanger / Illumina 1.9	401314	0	0-143	50	84.4972	139.694	pass	pass	warn	pass	fail	warn	pass	fail	pass	pass	pass
FD01874156.for.paired	FD01874156.for.paired	Original	Conventional base calls	Sanger / Illumina 1.9	510044	0	0-143	50	82.6135	140.387	pass	pass	pass	pass	fail	warn	pass	fail	pass	pass	pass
FD01874156.rev.paired	FD01874156.rev.paired	Original	Conventional base calls	Sanger / Illumina 1.9	510044	0	0-143	50	83.6473	139.5	pass	pass	warn	pass	fail	warn	pass	fail	pass	pass	pass
FD01874157.for.paired	FD01874157.for.paired	Original	Conventional base calls	Sanger / Illumina 1.9	430535	0	0-143	50	82.997	140.22	pass	pass	pass	pass	fail	warn	pass	fail	pass	pass	pass
FD01874157.rev.paired	FD01874157.rev.paired	Original	Conventional base calls	Sanger / Illumina 1.9	430535	0	0-143	50	83.9253	139.361	pass	pass	warn	pass	fail	warn	pass	fail	pass	pass	pass
FD01874158.for.paired	FD01874158.for.paired	Original	Conventional base calls	Sanger / Illumina 1.9	513646	0	0-143	50	82.4717	139.98	pass	pass	pass	pass	fail	fail	pass	fail	pass	warn	pass
FD01874158.rev.paired	FD01874158.rev.paired	Original	Conventional base calls	Sanger / Illumina 1.9	513646	0	0-143	50	83.4584	139.18	pass	pass	warn	pass	fail	warn	pass	fail	pass	pass	pass
FD01874159.for.paired	FD01874159.for.paired	Original	Conventional base calls	Sanger / Illumina 1.9	452037	0	0-143	50	75.6341	140.794	pass	pass	pass	pass	fail	fail	pass	fail	pass	pass	pass
FD01874159.rev.paired	FD01874159.rev.paired	Original	Conventional base calls	Sanger / Illumina 1.9	452037	0	0-143	50	77.0668	139.706	pass	pass	warn	pass	fail	warn	pass	fail	pass	pass	pass
FD01874160.for.paired	FD01874160.for.paired	Original	Conventional base calls	Sanger / Illumina 1.9	508308	0	0-143	50	76.651	140.829	pass	pass	pass	pass	fail	warn	pass	fail	pass	pass	pass
FD01874160.rev.paired	FD01874160.rev.paired	Original	Conventional base calls	Sanger / Illumina 1.9	508308	0	0-143	50	77.8199	139.801	pass	pass	warn	pass	fail	warn	pass	fail	pass	pass	pass
FD01874161.for.paired	FD01874161.for.paired	Original	Conventional base calls	Sanger / Illumina 1.9	482443	0	0-143	50	65.4467	140.899	pass	pass	pass	pass	fail	fail	pass	fail	warn	pass	pass
FD01874161.rev.paired	FD01874161.rev.paired	Original	Conventional base calls	Sanger / Illumina 1.9	482443	0	0-143	50	66.8117	139.954	pass	pass	warn	pass	fail	fail	pass	fail	warn	pass	pass
FD01874162.for.paired	FD01874162.for.paired	Original	Conventional base calls	Sanger / Illumina 1.9	522163	0	0-143	51	81.0944	140.718	pass	pass	pass	pass	fail	warn	pass	fail	pass	pass	pass
FD01874162.rev.paired	FD01874162.rev.paired	Original	Conventional base calls	Sanger / Illumina 1.9	522163	0	0-143	51	82.4307	139.81	pass	pass	warn	pass	warn	warn	pass	fail	pass	pass	pass
FD01874163.for.paired	FD01874163.for.paired	Original	Conventional base calls	Sanger / Illumina 1.9	461428	0	0-143	51	78.8429	140.937	pass	pass	pass	pass	warn	warn	pass	fail	pass	pass	pass
FD01874163.rev.paired	FD01874163.rev.paired	Original	Conventional base calls	Sanger / Illumina 1.9	461428	0	0-143	50	80.1236	139.949	pass	pass	warn	pass	warn	warn	pass	fail	pass	pass	pass
FD01874164.for.paired	FD01874164.for.paired	Original	Conventional base calls	Sanger / Illumina 1.9	490844	0	0-143	50	76.3098	141.07	pass	pass	pass	pass	fail	warn	pass	fail	pass	pass	pass
FD01874164.rev.paired	FD01874164.rev.paired	Original	Conventional base calls	Sanger / Illumina 1.9	490844	0	0-143	50	77.4632	140.005	pass	pass	warn	pass	fail	warn	pass	fail	pass	pass	pass
FD01874165.for.paired	FD01874165.for.paired	Original	Conventional base calls	Sanger / Illumina 1.9	506834	0	0-143	51	81.2401	140.486	pass	pass	pass	pass	fail	warn	pass	fail	pass	pass	pass
FD01874165.rev.paired	FD01874165.rev.paired	Original	Conventional base calls	Sanger / Illumina 1.9	506834	0	0-143	50	82.4217	139.6	pass	pass	warn	pass	fail	warn	pass	fail	pass	pass	pass
FD01874166.for.paired	FD01874166.for.paired	Original	Conventional base calls	Sanger / Illumina 1.9	641024	0	0-143	50	75.7302	140.633	pass	pass	pass	pass	fail	warn	pass	fail	pass	pass	pass
FD01874166.rev.paired	FD01874166.rev.paired	Original	Conventional base calls	Sanger / Illumina 1.9	641024	0	0-143	50	76.9304	139.768	pass	pass	warn	pass	fail	warn	pass	fail	pass	pass	pass
FD01874167.for.paired	FD01874167.for.paired	Original	Conventional base calls	Sanger / Illumina 1.9	512159	0	0-143	50	73.2092	140.62	pass	pass	pass	pass	fail	fail	pass	fail	pass	pass	pass
FD01874167.rev.paired	FD01874167.rev.paired	Original	Conventional base calls	Sanger / Illumina 1.9	512159	0	0-143	50	74.5421	139.503	pass	pass	warn	pass	fail	warn	pass	fail	pass	pass	pass
FD01874168.for.paired	FD01874168.for.paired	Original	Conventional base calls	Sanger / Illumina 1.9	533760	0	0-143	50	71.6762	140.171	pass	pass	pass	pass	fail	fail	pass	fail	pass	warn	pass
FD01874168.rev.paired	FD01874168.rev.paired	Original	Conventional base calls	Sanger / Illumina 1.9	533760	0	0-143	50	73.1126	139.388	pass	pass	warn	pass	fail	warn	pass	fail	pass	pass	pass
FD01874169.for.paired	FD01874169.for.paired	Original	Conventional base calls	Sanger / Illumina 1.9	641687	0	0-143	50	73.6199	141.133	pass	pass	pass	pass	fail	warn	pass	fail	pass	pass	pass
FD01874169.rev.paired	FD01874169.rev.paired	Original	Conventional base calls	Sanger / Illumina 1.9	641687	0	0-143	50	75.0573	140.028	pass	pass	warn	pass	fail	warn	pass	fail	pass	pass	pass
FD01874170.for.paired	FD01874170.for.paired	Original	Conventional base calls	Sanger / Illumina 1.9	472758	0	0-143	50	76.2563	140.797	pass	pass	pass	pass	fail	warn	pass	fail	pass	pass	pass
FD01874170.rev.paired	FD01874170.rev.paired	Original	Conventional base calls	Sanger / Illumina 1.9	472758	0	0-143	50	77.5738	139.81	pass	pass	warn	pass	fail	warn	pass	fail	pass	pass	pass
FD01874171.for.paired	FD01874171.for.paired	Original	Conventional base calls	Sanger / Illumina 1.9	468853	0	0-143	50	79.0385	140.846	pass	pass	pass	pass	warn	warn	pass	fail	pass	pass	pass
FD01874171.rev.paired	FD01874171.rev.paired	Original	Conventional base calls	Sanger / Illumina 1.9	468853	0	0-143	50	80.1434	139.931	pass	pass	warn	pass	warn	warn	pass	fail	pass	pass	pass
FD01874172.for.paired	FD01874172.for.paired	Original	Conventional base calls	Sanger / Illumina 1.9	470023	0	0-143	50	80.6637	140.845	pass	pass	pass	pass	fail	warn	pass	fail	pass	pass	pass
FD01874172.rev.paired	FD01874172.rev.paired	Original	Conventional base calls	Sanger / Illumina 1.9	470023	0	0-143	50	82.0119	139.825	pass	pass	warn	pass	fail	warn	pass	fail	pass	pass	pass
FD01874173.for.paired	FD01874173.for.paired	Original	Conventional base calls	Sanger / Illumina 1.9	441938	0	0-143	51	83.6921	140.215	pass	pass	pass	pass	fail	warn	pass	fail	pass	warn	pass
FD01874173.rev.paired	FD01874173.rev.paired	Original	Conventional base calls	Sanger / Illumina 1.9	441938	0	0-143	51	84.6492	139.329	pass	pass	warn	pass	fail	warn	pass	fail	pass	pass	pass
FD01874174.for.paired	FD01874174.for.paired	Original	Conventional base calls	Sanger / Illumina 1.9	581574	0	0-143	50	80.6519	140.2	pass	pass	pass	pass	fail	warn	pass	fail	pass	warn	pass
FD01874174.rev.paired	FD01874174.rev.paired	Original	Conventional base calls	Sanger / Illumina 1.9	581574	0	0-143	50	81.7203	139.469	pass	pass	warn	pass	fail	warn	pass	fail	pass	pass	pass
FD01874175.for.paired	FD01874175.for.paired	Original	Conventional base calls	Sanger / Illumina 1.9	514969	0	0-143	50	72.8618	140.155	pass	pass	pass	pass	fail	fail	pass	fail	pass	warn	pass
FD01874175.rev.paired	FD01874175.rev.paired	Original	Conventional base calls	Sanger / Illumina 1.9	514969	0	0-143	50	74.03	139.426	pass	pass	warn	pass	fail	warn	pass	fail	pass	pass	pass
FD01874176.for.paired	FD01874176.for.paired	Original	Conventional base calls	Sanger / Illumina 1.9	702195	0	0-143	50	67.8719	140.093	pass	pass	pass	pass	fail	fail	pass	fail	warn	warn	pass
FD01874176.rev.paired	FD01874176.rev.paired	Original	Conventional base calls	Sanger / Illumina 1.9	702195	0	0-143	50	69.5445	139.362	pass	pass	warn	pass	fail	warn	pass	fail	warn	pass	pass
FD01874179.for.paired	FD01874179.for.paired	Original	Conventional base calls	Sanger / Illumina 1.9	488409	0	0-143	50	80.1685	140.042	pass	pass	pass	pass	warn	warn	pass	fail	pass	warn	pass
FD01874179.rev.paired	FD01874179.rev.paired	Original	Conventional base calls	Sanger / Illumina 1.9	488409	0	0-143	50	81.2895	139.381	pass	pass	warn	pass	warn	warn	pass	fail	pass	pass	pass
FD01874180.for.paired	FD01874180.for.paired	Original	Conventional base calls	Sanger / Illumina 1.9	463304	0	0-143	50	83.622	140.408	pass	pass	pass	pass	fail	warn	pass	fail	pass	pass	pass
FD01874180.rev.paired	FD01874180.rev.paired	Original	Conventional base calls	Sanger / Illumina 1.9	463304	0	0-143	50	84.5698	139.54	pass	pass	warn	pass	fail	warn	pass	fail	pass	pass	pass
FD01874181.for.paired	FD01874181.for.paired	Original	Conventional base calls	Sanger / Illumina 1.9	457065	0	0-143	50	82.3032	140.759	pass	pass	pass	pass	fail	warn	pass	fail	pass	pass	pass
FD01874181.rev.paired	FD01874181.rev.paired	Original	Conventional base calls	Sanger / Illumina 1.9	457065	0	0-143	50	83.2598	139.822	pass	pass	warn	pass	fail	warn	pass	fail	pass	pass	pass
FD01874182.for.paired	FD01874182.for.paired	Original	Conventional base calls	Sanger / Illumina 1.9	339771	0	0-143	51	84.3142	141.204	pass	pass	pass	pass	fail	warn	pass	fail	pass	pass	pass
FD01874182.rev.paired	FD01874182.rev.paired	Original	Conventional base calls	Sanger / Illumina 1.9	339771	0	0-143	50	85.1156	140.067	pass	pass	warn	pass	fail	warn	pass	fail	pass	pass	pass
FD01874183.for.paired	FD01874183.for.paired	Original	Conventional base calls	Sanger / Illumina 1.9	468347	0	0-143	50	76.6108	140.768	pass	pass	pass	pass	fail	warn	pass	fail	pass	pass	pass
FD01874183.rev.paired	FD01874183.rev.paired	Original	Conventional base calls	Sanger / Illumina 1.9	468347	0	0-143	50	77.5939	139.832	pass	pass	warn	pass	fail	warn	pass	fail	pass	pass	pass
FD01874184.for.paired	FD01874184.for.paired	Original	Conventional base calls	Sanger / Illumina 1.9	369822	0	0-143	50	81.293	140.532	pass	pass	pass	pass	fail	warn	pass	fail	pass	pass	pass
FD01874184.rev.paired	FD01874184.rev.paired	Original	Conventional base calls	Sanger / Illumina 1.9	369822	0	0-143	50	82.6177	139.56	pass	pass	warn	pass	fail	warn	pass	fail	pass	pass	pass
FD01874185.for.paired	FD01874185.for.paired	Original	Conventional base calls	Sanger / Illumina 1.9	394633	0	0-143	50	70.4486	140.505	pass	pass	pass	pass	fail	fail	pass	fail	pass	pass	pass
FD01874185.rev.paired	FD01874185.rev.paired	Original	Conventional base calls	Sanger / Illumina 1.9	394633	0	0-143	49	72.1953	139.606	pass	pass	warn	pass	fail	warn	pass	fail	pass	pass	pass
FD01874186.for.paired	FD01874186.for.paired	Original	Conventional base calls	Sanger / Illumina 1.9	715533	0	0-143	50	76.2806	141.069	pass	pass	pass	pass	fail	warn	pass	fail	pass	pass	pass
FD01874186.rev.paired	FD01874186.rev.paired	Original	Conventional base calls	Sanger / Illumina 1.9	715533	0	0-143	50	77.5089	140.043	pass	pass	warn	pass	fail	warn	pass	fail	pass	pass	pass
FD01874187.for.paired	FD01874187.for.paired	Original	Conventional base calls	Sanger / Illumina 1.9	446136	0	0-143	50	79.059	140.643	pass	pass	pass	pass	fail	warn	pass	fail	pass	pass	pass
FD01874187.rev.paired	FD01874187.rev.paired	Original	Conventional base calls	Sanger / Illumina 1.9	446136	0	0-143	50	80.3767	139.813	pass	pass	warn	pass	warn	warn	pass	fail	pass	pass	pass
FD01874188.for.paired	FD01874188.for.paired	Original	Conventional base calls	Sanger / Illumina 1.9	564674	0	0-143	50	80.1761	140.776	pass	pass	pass	pass	fail	warn	pass	fail	pass	pass	pass
FD01874188.rev.paired	FD01874188.rev.paired	Original	Conventional base calls	Sanger / Illumina 1.9	564674	0	0-143	50	81.4	139.856	pass	pass	warn	pass	warn	warn	pass	fail	pass	pass	pass
FD01874189.for.paired	FD01874189.for.paired	Original	Conventional base calls	Sanger / Illumina 1.9	592055	0	0-143	50	81.2081	139.788	pass	pass	pass	pass	fail	fail	pass	fail	pass	warn	pass
FD01874189.rev.paired	FD01874189.rev.paired	Original	Conventional base calls	Sanger / Illumina 1.9	592055	0	0-143	50	82.4555	139.196	pass	pass	warn	pass	fail	warn	pass	fail	pass	pass	pass
FD01874190.for.paired	FD01874190.for.paired	Original	Conventional base calls	Sanger / Illumina 1.9	581167	0	0-143	50	80.232	140.612	pass	pass	pass	pass	fail	warn	pass	fail	pass	pass	pass
FD01874190.rev.paired	FD01874190.rev.paired	Original	Conventional base calls	Sanger / Illumina 1.9	581167	0	0-143	50	81.1497	139.773	pass	pass	warn	pass	fail	warn	pass	fail	pass	pass	pass
FD01874191.for.paired	FD01874191.for.paired	Original	Conventional base calls	Sanger / Illumina 1.9	496273	0	0-143	49	72.7377	140.791	pass	pass	pass	pass	fail	fail	pass	fail	pass	pass	pass
FD01874191.rev.paired	FD01874191.rev.paired	Original	Conventional base calls	Sanger / Illumina 1.9	496273	0	0-143	49	73.9085	139.881	pass	pass	warn	pass	fail	warn	pass	fail	pass	pass	pass
FD01874192.for.paired	FD01874192.for.paired	Original	Conventional base calls	Sanger / Illumina 1.9	500270	0	0-143	50	74.693	140.692	pass	pass	pass	pass	fail	fail	pass	fail	pass	pass	pass
FD01874192.rev.paired	FD01874192.rev.paired	Original	Conventional base calls	Sanger / Illumina 1.9	500270	0	0-143	50	75.8762	139.778	pass	pass	warn	pass	fail	warn	pass	fail	pass	pass	pass
FD01874193.for.paired	FD01874193.for.paired	Original	Conventional base calls	Sanger / Illumina 1.9	394013	0	0-143	49	77.2978	140.374	pass	pass	pass	pass	fail	fail	pass	fail	pass	pass	pass
FD01874193.rev.paired	FD01874193.rev.paired	Original	Conventional base calls	Sanger / Illumina 1.9	394013	0	0-143	49	78.6921	139.784	pass	pass	warn	pass	fail	warn	pass	fail	pass	pass	pass
FD01874667.for.paired	FD01874667.for.paired	Original	Conventional base calls	Sanger / Illumina 1.9	365822	0	0-143	50	85.2536	140.428	pass	pass	pass	pass	warn	warn	pass	fail	pass	pass	pass
FD01874667.rev.paired	FD01874667.rev.paired	Original	Conventional base calls	Sanger / Illumina 1.9	365822	0	0-143	50	85.4957	140.433	pass	pass	warn	pass	warn	warn	pass	fail	pass	pass	pass
FD01874675.for.paired	FD01874675.for.paired	Original	Conventional base calls	Sanger / Illumina 1.9	463229	0	0-143	49	80.5689	139.424	pass	pass	pass	pass	fail	fail	pass	fail	pass	pass	pass
FD01874675.rev.paired	FD01874675.rev.paired	Original	Conventional base calls	Sanger / Illumina 1.9	463229	0	0-143	49	81.5893	139.496	pass	pass	warn	pass	warn	fail	pass	fail	pass	pass	pass
FD01874676.for.paired	FD01874676.for.paired	Original	Conventional base calls	Sanger / Illumina 1.9	764133	0	0-143	50	75.9014	139.15	pass	pass	pass	pass	fail	warn	pass	fail	pass	warn	pass
FD01874676.rev.paired	FD01874676.rev.paired	Original	Conventional base calls	Sanger / Illumina 1.9	764133	0	0-143	50	77.109	139.047	pass	pass	warn	pass	fail	warn	pass	fail	pass	pass	pass
FD01874677.for.paired	FD01874677.for.paired	Original	Conventional base calls	Sanger / Illumina 1.9	737541	0	0-143	51	78.4338	140.133	pass	pass	pass	pass	fail	fail	pass	fail	pass	warn	pass
FD01874677.rev.paired	FD01874677.rev.paired	Original	Conventional base calls	Sanger / Illumina 1.9	737541	0	0-143	50	79.1965	139.321	pass	pass	warn	pass	warn	warn	pass	fail	pass	pass	pass
FD01874678.for.paired	FD01874678.for.paired	Original	Conventional base calls	Sanger / Illumina 1.9	1636337	0	0-143	50	66.0187	140.451	pass	pass	pass	pass	fail	fail	pass	fail	warn	pass	pass
FD01874678.rev.paired	FD01874678.rev.paired	Original	Conventional base calls	Sanger / Illumina 1.9	1636337	0	0-143	50	67.2794	139.625	pass	pass	warn	pass	warn	warn	pass	fail	warn	pass	pass
FD01874679.for.paired	FD01874679.for.paired	Original	Conventional base calls	Sanger / Illumina 1.9	834422	0	0-143	51	72.4564	140.844	pass	pass	pass	pass	fail	warn	pass	fail	pass	pass	pass
FD01874679.rev.paired	FD01874679.rev.paired	Original	Conventional base calls	Sanger / Illumina 1.9	834422	0	0-143	50	73.3783	139.856	pass	pass	warn	pass	warn	warn	pass	fail	pass	pass	pass
FD01874680.for.paired	FD01874680.for.paired	Original	Conventional base calls	Sanger / Illumina 1.9	651228	0	0-143	50	76.7942	140.386	pass	pass	pass	pass	fail	warn	pass	fail	pass	pass	pass
FD01874680.rev.paired	FD01874680.rev.paired	Original	Conventional base calls	Sanger / Illumina 1.9	651228	0	0-143	50	77.4451	139.5	pass	pass	warn	pass	warn	warn	pass	fail	pass	pass	pass
FD01874681.for.paired	FD01874681.for.paired	Original	Conventional base calls	Sanger / Illumina 1.9	1989622	0	0-143	50	62.3467	140.254	pass	pass	pass	pass	fail	warn	pass	fail	warn	warn	pass
FD01874681.rev.paired	FD01874681.rev.paired	Original	Conventional base calls	Sanger / Illumina 1.9	1989622	0	0-143	50	63.4883	139.454	pass	pass	warn	pass	fail	warn	pass	fail	warn	pass	pass
FD01874682.for.paired	FD01874682.for.paired	Original	Conventional base calls	Sanger / Illumina 1.9	606889	0	0-143	51	81.4306	140.331	pass	pass	pass	pass	fail	warn	pass	fail	pass	pass	pass
FD01874682.rev.paired	FD01874682.rev.paired	Original	Conventional base calls	Sanger / Illumina 1.9	606889	0	0-143	51	82.4233	139.401	pass	pass	warn	pass	warn	warn	pass	fail	pass	pass	pass
FD01874683.for.paired	FD01874683.for.paired	Original	Conventional base calls	Sanger / Illumina 1.9	1557203	0	0-143	50	67.4608	139.681	pass	pass	pass	pass	fail	fail	pass	fail	warn	warn	pass
FD01874683.rev.paired	FD01874683.rev.paired	Original	Conventional base calls	Sanger / Illumina 1.9	1557203	0	0-143	50	68.6115	138.997	pass	pass	warn	pass	fail	warn	pass	fail	warn	pass	pass
FD01874684.for.paired	FD01874684.for.paired	Original	Conventional base calls	Sanger / Illumina 1.9	709595	0	0-143	50	79.0434	139.804	pass	pass	warn	pass	fail	warn	pass	fail	pass	pass	pass
FD01874684.rev.paired	FD01874684.rev.paired	Original	Conventional base calls	Sanger / Illumina 1.9	709595	0	0-143	50	80.2145	139.424	pass	pass	warn	pass	warn	warn	pass	fail	pass	pass	pass
FD01874685.for.paired	FD01874685.for.paired	Original	Conventional base calls	Sanger / Illumina 1.9	1116395	0	0-143	50	73.1446	140.255	pass	pass	pass	pass	fail	warn	pass	fail	pass	pass	pass
FD01874685.rev.paired	FD01874685.rev.paired	Original	Conventional base calls	Sanger / Illumina 1.9	1116395	0	0-143	50	74.1845	139.404	pass	pass	warn	pass	warn	warn	pass	fail	pass	pass	pass
FD01874686.for.paired	FD01874686.for.paired	Original	Conventional base calls	Sanger / Illumina 1.9	866457	0	0-143	50	76.7397	139.526	pass	pass	pass	pass	fail	warn	pass	fail	pass	warn	pass
FD01874686.rev.paired	FD01874686.rev.paired	Original	Conventional base calls	Sanger / Illumina 1.9	866457	0	0-143	50	78.006	139.142	pass	pass	warn	pass	warn	warn	pass	fail	pass	pass	pass
FD01874687.for.paired	FD01874687.for.paired	Original	Conventional base calls	Sanger / Illumina 1.9	1417290	0	0-143	50	69.0895	140.4	pass	pass	pass	pass	fail	warn	pass	fail	warn	pass	pass
FD01874687.rev.paired	FD01874687.rev.paired	Original	Conventional base calls	Sanger / Illumina 1.9	1417290	0	0-143	50	70.4105	139.536	pass	pass	warn	pass	warn	warn	pass	fail	pass	pass	pass
FD01874688.for.paired	FD01874688.for.paired	Original	Conventional base calls	Sanger / Illumina 1.9	1183375	0	0-143	50	72.4603	140.136	pass	pass	pass	pass	fail	warn	pass	fail	pass	warn	pass
FD01874688.rev.paired	FD01874688.rev.paired	Original	Conventional base calls	Sanger / Illumina 1.9	1183375	0	0-143	50	73.628	139.342	pass	pass	warn	pass	fail	warn	pass	fail	pass	pass	pass
FD01874689.for.paired	FD01874689.for.paired	Original	Conventional base calls	Sanger / Illumina 1.9	658094	0	0-143	50	78.9048	140.61	pass	pass	pass	pass	fail	warn	pass	fail	pass	pass	pass
FD01874689.rev.paired	FD01874689.rev.paired	Original	Conventional base calls	Sanger / Illumina 1.9	658094	0	0-143	50	80.0272	139.615	pass	pass	warn	pass	fail	warn	pass	fail	pass	pass	pass
FD01874691.for.paired	FD01874691.for.paired	Original	Conventional base calls	Sanger / Illumina 1.9	915930	0	0-143	49	73.7808	140.247	pass	pass	pass	pass	fail	fail	pass	fail	pass	pass	pass
FD01874691.rev.paired	FD01874691.rev.paired	Original	Conventional base calls	Sanger / Illumina 1.9	915930	0	0-143	49	74.9732	139.362	pass	pass	warn	pass	fail	warn	pass	fail	pass	pass	pass
FD01874692.for.paired	FD01874692.for.paired	Original	Conventional base calls	Sanger / Illumina 1.9	634320	0	0-143	50	80.5137	139.896	pass	pass	pass	pass	warn	fail	pass	fail	pass	warn	pass
FD01874692.rev.paired	FD01874692.rev.paired	Original	Conventional base calls	Sanger / Illumina 1.9	634320	0	0-143	50	81.5991	139.23	pass	pass	warn	pass	warn	warn	pass	fail	pass	pass	pass
FD01874693.for.paired	FD01874693.for.paired	Original	Conventional base calls	Sanger / Illumina 1.9	669523	0	0-143	50	82.2241	140.504	pass	pass	pass	pass	warn	warn	pass	fail	pass	pass	pass
FD01874693.rev.paired	FD01874693.rev.paired	Original	Conventional base calls	Sanger / Illumina 1.9	669523	0	0-143	50	83.2244	139.541	pass	pass	warn	pass	warn	warn	pass	fail	pass	pass	pass
FD01874694.for.paired	FD01874694.for.paired	Original	Conventional base calls	Sanger / Illumina 1.9	725203	0	0-143	50	79.0447	139.842	pass	pass	pass	pass	fail	fail	pass	fail	pass	warn	pass
FD01874694.rev.paired	FD01874694.rev.paired	Original	Conventional base calls	Sanger / Illumina 1.9	725203	0	0-143	50	80.4173	139.127	pass	pass	warn	pass	warn	warn	pass	fail	pass	pass	pass
FD01874695.for.paired	FD01874695.for.paired	Original	Conventional base calls	Sanger / Illumina 1.9	1088595	0	0-143	49	77.0192	139.943	pass	pass	pass	pass	fail	fail	pass	fail	pass	warn	pass
FD01874695.rev.paired	FD01874695.rev.paired	Original	Conventional base calls	Sanger / Illumina 1.9	1088595	0	0-143	49	78.2873	139.195	pass	pass	warn	pass	warn	warn	pass	fail	pass	pass	pass
FD01874696.for.paired	FD01874696.for.paired	Original	Conventional base calls	Sanger / Illumina 1.9	1148136	0	0-143	50	72.4016	140.485	pass	pass	pass	pass	fail	warn	pass	fail	pass	pass	pass
FD01874696.rev.paired	FD01874696.rev.paired	Original	Conventional base calls	Sanger / Illumina 1.9	1148136	0	0-143	50	73.8678	139.59	pass	pass	warn	pass	fail	warn	pass	fail	pass	pass	pass
FD01874697.for.paired	FD01874697.for.paired	Original	Conventional base calls	Sanger / Illumina 1.9	1685222	0	0-143	50	63.7894	140.402	pass	pass	pass	pass	fail	fail	pass	fail	warn	pass	pass
FD01874697.rev.paired	FD01874697.rev.paired	Original	Conventional base calls	Sanger / Illumina 1.9	1685222	0	0-143	50	65.1579	139.468	pass	pass	warn	pass	fail	warn	pass	fail	warn	pass	pass
FD01874698.for.paired	FD01874698.for.paired	Original	Conventional base calls	Sanger / Illumina 1.9	668112	0	0-143	50	72.2219	140.857	pass	pass	pass	pass	fail	warn	pass	fail	pass	pass	pass
FD01874698.rev.paired	FD01874698.rev.paired	Original	Conventional base calls	Sanger / Illumina 1.9	668112	0	0-143	50	73.2759	139.83	pass	pass	warn	pass	warn	warn	pass	fail	pass	pass	pass
FD01874699.for.paired	FD01874699.for.paired	Original	Conventional base calls	Sanger / Illumina 1.9	828858	0	0-143	50	73.5542	140.133	pass	pass	pass	pass	fail	fail	pass	fail	pass	warn	pass
FD01874699.rev.paired	FD01874699.rev.paired	Original	Conventional base calls	Sanger / Illumina 1.9	828858	0	0-143	50	74.9736	139.276	pass	pass	warn	pass	warn	warn	pass	fail	pass	pass	pass
FD01874700.for.paired	FD01874700.for.paired	Original	Conventional base calls	Sanger / Illumina 1.9	1183717	0	0-143	50	72.7806	139.818	pass	pass	warn	pass	fail	fail	pass	fail	pass	pass	pass
FD01874700.rev.paired	FD01874700.rev.paired	Original	Conventional base calls	Sanger / Illumina 1.9	1183717	0	0-143	50	74.0167	139.391	pass	pass	warn	pass	warn	warn	pass	fail	pass	pass	pass
FD01874701.for.paired	FD01874701.for.paired	Original	Conventional base calls	Sanger / Illumina 1.9	1030125	0	0-143	50	74.3613	140.705	pass	pass	pass	pass	fail	warn	pass	fail	pass	pass	pass
FD01874701.rev.paired	FD01874701.rev.paired	Original	Conventional base calls	Sanger / Illumina 1.9	1030125	0	0-143	50	75.463	139.735	pass	pass	warn	pass	warn	warn	pass	fail	pass	pass	pass
FD01874702.for.paired	FD01874702.for.paired	Original	Conventional base calls	Sanger / Illumina 1.9	565963	0	0-143	50	81.0042	140.424	pass	pass	pass	pass	fail	warn	pass	fail	pass	pass	pass
FD01874702.rev.paired	FD01874702.rev.paired	Original	Conventional base calls	Sanger / Illumina 1.9	565963	0	0-143	50	82.1647	139.465	pass	pass	warn	pass	warn	warn	pass	fail	pass	pass	pass
FD01874703.for.paired	FD01874703.for.paired	Original	Conventional base calls	Sanger / Illumina 1.9	858210	0	0-143	50	76.3847	140.24	pass	pass	pass	pass	fail	warn	pass	fail	pass	warn	pass
FD01874703.rev.paired	FD01874703.rev.paired	Original	Conventional base calls	Sanger / Illumina 1.9	858210	0	0-143	50	77.4699	139.449	pass	pass	warn	pass	warn	warn	pass	fail	pass	pass	pass
FD01874704.for.paired	FD01874704.for.paired	Original	Conventional base calls	Sanger / Illumina 1.9	1391062	0	0-143	50	70.127	140.422	pass	pass	pass	pass	fail	warn	pass	fail	pass	pass	pass
FD01874704.rev.paired	FD01874704.rev.paired	Original	Conventional base calls	Sanger / Illumina 1.9	1391062	0	0-143	50	71.1239	139.5	pass	pass	warn	pass	fail	warn	pass	fail	pass	pass	pass
FD01874705.for.paired	FD01874705.for.paired	Original	Conventional base calls	Sanger / Illumina 1.9	524537	0	0-143	50	79.0622	140.411	pass	pass	pass	pass	fail	warn	pass	fail	pass	pass	pass
FD01874705.rev.paired	FD01874705.rev.paired	Original	Conventional base calls	Sanger / Illumina 1.9	524537	0	0-143	50	80.1685	139.531	pass	pass	warn	pass	fail	warn	pass	fail	pass	pass	pass
FD01874707.for.paired	FD01874707.for.paired	Original	Conventional base calls	Sanger / Illumina 1.9	630999	0	0-143	50	74.7636	140.518	pass	pass	pass	pass	fail	warn	pass	fail	pass	pass	pass
FD01874707.rev.paired	FD01874707.rev.paired	Original	Conventional base calls	Sanger / Illumina 1.9	630999	0	0-143	50	75.9682	139.588	pass	pass	warn	pass	fail	warn	pass	fail	pass	pass	pass
FD01874708.for.paired	FD01874708.for.paired	Original	Conventional base calls	Sanger / Illumina 1.9	726386	0	0-143	50	77.3999	140.647	pass	pass	pass	pass	fail	warn	pass	fail	pass	pass	pass
FD01874708.rev.paired	FD01874708.rev.paired	Original	Conventional base calls	Sanger / Illumina 1.9	726386	0	0-143	50	78.5952	139.586	pass	pass	warn	pass	warn	warn	pass	fail	pass	pass	pass
FD01874709.for.paired	FD01874709.for.paired	Original	Conventional base calls	Sanger / Illumina 1.9	902618	0	0-143	50	83.7945	140.595	pass	pass	pass	pass	fail	warn	pass	fail	pass	pass	pass
FD01874709.rev.paired	FD01874709.rev.paired	Original	Conventional base calls	Sanger / Illumina 1.9	902618	0	0-143	50	84.6017	139.576	pass	pass	warn	pass	fail	warn	pass	fail	pass	pass	pass
FD01874710.for.paired	FD01874710.for.paired	Original	Conventional base calls	Sanger / Illumina 1.9	593030	0	0-143	50	80.9433	140.394	pass	pass	pass	pass	fail	warn	pass	fail	pass	pass	pass
FD01874710.rev.paired	FD01874710.rev.paired	Original	Conventional base calls	Sanger / Illumina 1.9	593030	0	0-143	50	82.3999	139.477	pass	pass	warn	pass	warn	warn	pass	fail	pass	pass	pass
FD01874711.for.paired	FD01874711.for.paired	Original	Conventional base calls	Sanger / Illumina 1.9	799227	0	0-143	50	80.5761	140.39	pass	pass	pass	pass	warn	warn	pass	fail	pass	pass	pass
FD01874711.rev.paired	FD01874711.rev.paired	Original	Conventional base calls	Sanger / Illumina 1.9	799227	0	0-143	50	81.7013	139.468	pass	pass	warn	pass	warn	warn	pass	fail	pass	pass	pass
FD01874712.for.paired	FD01874712.for.paired	Original	Conventional base calls	Sanger / Illumina 1.9	510546	0	0-143	50	84.9304	140.147	pass	pass	pass	pass	fail	warn	pass	fail	pass	pass	pass
FD01874712.rev.paired	FD01874712.rev.paired	Original	Conventional base calls	Sanger / Illumina 1.9	510546	0	0-143	50	85.7459	139.443	pass	pass	warn	pass	warn	warn	pass	fail	pass	pass	pass
FD01874713.for.paired	FD01874713.for.paired	Original	Conventional base calls	Sanger / Illumina 1.9	1076527	0	0-143	50	69.035	140.725	pass	pass	pass	pass	fail	warn	pass	fail	warn	pass	pass
FD01874713.rev.paired	FD01874713.rev.paired	Original	Conventional base calls	Sanger / Illumina 1.9	1076527	0	0-143	50	70.8388	139.792	pass	pass	warn	pass	warn	warn	pass	fail	pass	pass	pass
FD01874714.for.paired	FD01874714.for.paired	Original	Conventional base calls	Sanger / Illumina 1.9	1395332	0	0-143	50	66.8729	139.549	pass	pass	pass	pass	fail	warn	pass	fail	warn	pass	pass
FD01874714.rev.paired	FD01874714.rev.paired	Original	Conventional base calls	Sanger / Illumina 1.9	1395332	0	0-143	50	68.3207	139.376	pass	pass	warn	pass	fail	warn	pass	fail	warn	pass	pass
FD01874715.for.paired	FD01874715.for.paired	Original	Conventional base calls	Sanger / Illumina 1.9	474273	0	0-143	49	77.5028	140.41	pass	pass	pass	pass	fail	fail	pass	fail	pass	pass	pass
FD01874715.rev.paired	FD01874715.rev.paired	Original	Conventional base calls	Sanger / Illumina 1.9	474273	0	0-143	49	78.7114	139.582	pass	pass	warn	pass	warn	warn	pass	fail	pass	pass	pass
FD01874716.for.paired	FD01874716.for.paired	Original	Conventional base calls	Sanger / Illumina 1.9	794561	0	0-143	50	77.1289	140.2	pass	pass	pass	pass	fail	warn	pass	fail	pass	pass	pass
FD01874716.rev.paired	FD01874716.rev.paired	Original	Conventional base calls	Sanger / Illumina 1.9	794561	0	0-143	50	78.3393	139.448	pass	pass	warn	pass	warn	warn	pass	fail	pass	pass	pass
FD01874717.for.paired	FD01874717.for.paired	Original	Conventional base calls	Sanger / Illumina 1.9	671641	0	0-143	49	80.588	140.825	pass	pass	pass	pass	warn	fail	pass	fail	pass	pass	pass
FD01874717.rev.paired	FD01874717.rev.paired	Original	Conventional base calls	Sanger / Illumina 1.9	671641	0	0-143	49	81.5507	139.854	pass	pass	warn	pass	warn	warn	pass	fail	pass	pass	pass
FD01874718.for.paired	FD01874718.for.paired	Original	Conventional base calls	Sanger / Illumina 1.9	334485	0	0-143	50	86.0357	139.896	pass	pass	warn	pass	fail	warn	pass	fail	pass	pass	pass
FD01874718.rev.paired	FD01874718.rev.paired	Original	Conventional base calls	Sanger / Illumina 1.9	334485	0	0-143	50	86.834	139.359	pass	pass	warn	pass	warn	warn	pass	fail	pass	pass	pass
FD01874719.for.paired	FD01874719.for.paired	Original	Conventional base calls	Sanger / Illumina 1.9	368467	0	0-143	50	84.3703	139.897	pass	pass	pass	pass	fail	warn	pass	fail	pass	pass	pass
FD01874719.rev.paired	FD01874719.rev.paired	Original	Conventional base calls	Sanger / Illumina 1.9	368467	0	0-143	50	85.6424	139.508	pass	pass	warn	pass	warn	warn	pass	fail	pass	pass	pass
FD01874720.for.paired	FD01874720.for.paired	Original	Conventional base calls	Sanger / Illumina 1.9	953077	0	0-143	50	71.929	140.931	pass	pass	pass	pass	fail	fail	pass	fail	pass	pass	pass
FD01874720.rev.paired	FD01874720.rev.paired	Original	Conventional base calls	Sanger / Illumina 1.9	953077	0	0-143	50	73.089	139.836	pass	pass	warn	pass	warn	warn	pass	fail	pass	pass	pass
FD01874721.for.paired	FD01874721.for.paired	Original	Conventional base calls	Sanger / Illumina 1.9	769417	0	0-143	49	74.9762	140.491	pass	pass	pass	pass	fail	fail	pass	fail	pass	pass	pass
FD01874721.rev.paired	FD01874721.rev.paired	Original	Conventional base calls	Sanger / Illumina 1.9	769417	0	0-143	49	76.0562	139.571	pass	pass	warn	pass	fail	warn	pass	fail	pass	pass	pass
FD01874722.for.paired	FD01874722.for.paired	Original	Conventional base calls	Sanger / Illumina 1.9	1557626	0	0-143	50	64.6153	140.153	pass	pass	pass	pass	fail	fail	pass	fail	warn	warn	pass
FD01874722.rev.paired	FD01874722.rev.paired	Original	Conventional base calls	Sanger / Illumina 1.9	1557626	0	0-143	50	65.9153	139.339	pass	pass	warn	pass	fail	warn	pass	fail	warn	pass	pass
FD01874723.for.paired	FD01874723.for.paired	Original	Conventional base calls	Sanger / Illumina 1.9	1159607	0	0-143	50	64.9006	140.869	pass	pass	pass	pass	fail	warn	pass	fail	warn	pass	pass
FD01874723.rev.paired	FD01874723.rev.paired	Original	Conventional base calls	Sanger / Illumina 1.9	1159607	0	0-143	50	66.3561	139.886	pass	pass	warn	pass	fail	warn	pass	fail	warn	pass	pass
FD01874724.for.paired	FD01874724.for.paired	Original	Conventional base calls	Sanger / Illumina 1.9	510547	0	0-143	50	84.1067	140.545	pass	pass	pass	pass	warn	warn	pass	fail	pass	pass	pass
FD01874724.rev.paired	FD01874724.rev.paired	Original	Conventional base calls	Sanger / Illumina 1.9	510547	0	0-143	50	85.0544	139.572	pass	pass	warn	pass	warn	warn	pass	fail	pass	pass	pass
FD01874725.for.paired	FD01874725.for.paired	Original	Conventional base calls	Sanger / Illumina 1.9	380419	0	0-143	50	84.6583	140.798	pass	pass	pass	pass	fail	fail	pass	fail	pass	pass	pass
FD01874725.rev.paired	FD01874725.rev.paired	Original	Conventional base calls	Sanger / Illumina 1.9	380419	0	0-143	50	85.4975	139.8	pass	pass	warn	pass	warn	warn	pass	fail	pass	pass	pass
FD01874726.for.paired	FD01874726.for.paired	Original	Conventional base calls	Sanger / Illumina 1.9	1059294	0	0-143	50	74.8849	140.51	pass	pass	pass	pass	fail	warn	pass	fail	pass	pass	pass
FD01874726.rev.paired	FD01874726.rev.paired	Original	Conventional base calls	Sanger / Illumina 1.9	1059294	0	0-143	50	76.1834	139.583	pass	pass	warn	pass	warn	warn	pass	fail	pass	pass	pass
FD01874727.for.paired	FD01874727.for.paired	Original	Conventional base calls	Sanger / Illumina 1.9	893506	0	0-143	50	74.8825	140.927	pass	pass	pass	pass	fail	warn	pass	fail	pass	pass	pass
FD01874727.rev.paired	FD01874727.rev.paired	Original	Conventional base calls	Sanger / Illumina 1.9	893506	0	0-143	50	76.1046	139.848	pass	pass	warn	pass	warn	warn	pass	fail	pass	pass	pass
FD01874728.for.paired	FD01874728.for.paired	Original	Conventional base calls	Sanger / Illumina 1.9	1256222	0	0-143	50	69.9119	139.903	pass	pass	pass	pass	fail	fail	pass	fail	warn	warn	pass
FD01874728.rev.paired	FD01874728.rev.paired	Original	Conventional base calls	Sanger / Illumina 1.9	1256222	0	0-143	50	71.0874	139.141	pass	pass	warn	pass	fail	warn	pass	fail	pass	pass	pass
FD01874729.for.paired	FD01874729.for.paired	Original	Conventional base calls	Sanger / Illumina 1.9	990176	0	0-143	50	72.3327	138.744	pass	pass	pass	pass	fail	fail	pass	fail	pass	warn	pass
FD01874729.rev.paired	FD01874729.rev.paired	Original	Conventional base calls	Sanger / Illumina 1.9	990176	0	0-143	50	73.206	138.383	pass	pass	warn	pass	warn	warn	pass	fail	pass	pass	pass
FD01874730.for.paired	FD01874730.for.paired	Original	Conventional base calls	Sanger / Illumina 1.9	364170	0	0-143	50	85.2145	141.025	pass	pass	pass	pass	warn	warn	pass	fail	pass	pass	pass
FD01874730.rev.paired	FD01874730.rev.paired	Original	Conventional base calls	Sanger / Illumina 1.9	364170	0	0-143	50	86.178	139.874	pass	pass	warn	pass	warn	warn	pass	fail	pass	pass	pass
FD01874731.for.paired	FD01874731.for.paired	Original	Conventional base calls	Sanger / Illumina 1.9	1065484	0	0-143	50	72.9346	139.541	pass	pass	pass	pass	fail	fail	pass	fail	pass	pass	pass
FD01874731.rev.paired	FD01874731.rev.paired	Original	Conventional base calls	Sanger / Illumina 1.9	1065484	0	0-143	50	74.4238	139.267	pass	pass	warn	pass	warn	warn	pass	fail	pass	pass	pass
FD01874732.for.paired	FD01874732.for.paired	Original	Conventional base calls	Sanger / Illumina 1.9	523557	0	0-143	50	84.6012	140.218	pass	pass	pass	pass	warn	warn	pass	fail	pass	warn	pass
FD01874732.rev.paired	FD01874732.rev.paired	Original	Conventional base calls	Sanger / Illumina 1.9	523557	0	0-143	50	85.5701	139.307	pass	pass	warn	pass	warn	warn	pass	fail	pass	pass	pass
FD01874733.for.paired	FD01874733.for.paired	Original	Conventional base calls	Sanger / Illumina 1.9	718669	0	0-143	50	78.435	140.822	pass	pass	pass	pass	warn	warn	pass	fail	pass	pass	pass
FD01874733.rev.paired	FD01874733.rev.paired	Original	Conventional base calls	Sanger / Illumina 1.9	718669	0	0-143	50	79.6565	139.858	pass	pass	warn	pass	warn	warn	pass	fail	pass	pass	pass
FD01874734.for.paired	FD01874734.for.paired	Original	Conventional base calls	Sanger / Illumina 1.9	1500907	0	0-143	50	69.1493	141.125	pass	pass	pass	pass	fail	warn	pass	fail	warn	pass	pass
FD01874734.rev.paired	FD01874734.rev.paired	Original	Conventional base calls	Sanger / Illumina 1.9	1500907	0	0-143	50	70.9429	139.908	pass	pass	warn	pass	warn	warn	pass	fail	pass	pass	pass
FD01874735.for.paired	FD01874735.for.paired	Original	Conventional base calls	Sanger / Illumina 1.9	1242759	0	0-143	49	75.012	139.513	pass	pass	pass	pass	fail	fail	pass	fail	pass	warn	pass
FD01874735.rev.paired	FD01874735.rev.paired	Original	Conventional base calls	Sanger / Illumina 1.9	1242759	0	0-143	49	76.3675	138.845	pass	pass	warn	pass	fail	warn	pass	fail	pass	pass	pass
FD01874736.for.paired	FD01874736.for.paired	Original	Conventional base calls	Sanger / Illumina 1.9	759408	0	0-143	50	77.0069	140.365	pass	pass	pass	pass	fail	warn	pass	fail	pass	pass	pass
FD01874736.rev.paired	FD01874736.rev.paired	Original	Conventional base calls	Sanger / Illumina 1.9	759408	0	0-143	50	77.9501	139.396	pass	pass	warn	pass	warn	warn	pass	fail	pass	pass	pass
FD01874737.for.paired	FD01874737.for.paired	Original	Conventional base calls	Sanger / Illumina 1.9	656077	0	0-143	50	77.0775	140.5	pass	pass	pass	pass	fail	fail	pass	fail	pass	pass	pass
FD01874737.rev.paired	FD01874737.rev.paired	Original	Conventional base calls	Sanger / Illumina 1.9	656077	0	0-143	50	78.2573	139.486	pass	pass	warn	pass	warn	warn	pass	fail	pass	pass	pass
FD01874738.for.paired	FD01874738.for.paired	Original	Conventional base calls	Sanger / Illumina 1.9	1932665	0	0-143	50	61.5484	140.578	pass	pass	pass	pass	fail	warn	pass	fail	warn	pass	pass
FD01874738.rev.paired	FD01874738.rev.paired	Original	Conventional base calls	Sanger / Illumina 1.9	1932665	0	0-143	50	63.1173	139.599	pass	pass	warn	pass	fail	warn	pass	fail	warn	pass	pass
FD01874739.for.paired	FD01874739.for.paired	Original	Conventional base calls	Sanger / Illumina 1.9	1858641	0	0-143	50	59.5275	140.722	pass	pass	pass	pass	fail	fail	pass	fail	warn	pass	pass
FD01874739.rev.paired	FD01874739.rev.paired	Original	Conventional base calls	Sanger / Illumina 1.9	1858641	0	0-143	50	60.9042	139.716	pass	pass	warn	pass	fail	warn	pass	fail	warn	pass	pass
FD01874740.for.paired	FD01874740.for.paired	Original	Conventional base calls	Sanger / Illumina 1.9	865523	0	0-143	50	77.9715	140.612	pass	pass	pass	pass	fail	warn	pass	fail	pass	pass	pass
FD01874740.rev.paired	FD01874740.rev.paired	Original	Conventional base calls	Sanger / Illumina 1.9	865523	0	0-143	50	78.9847	139.629	pass	pass	warn	pass	warn	warn	pass	fail	pass	pass	pass
FD01874741.for.paired	FD01874741.for.paired	Original	Conventional base calls	Sanger / Illumina 1.9	424741	0	0-143	50	83.4512	140.245	pass	pass	pass	pass	fail	warn	pass	fail	pass	pass	pass
FD01874741.rev.paired	FD01874741.rev.paired	Original	Conventional base calls	Sanger / Illumina 1.9	424741	0	0-143	50	84.7355	139.398	pass	pass	warn	pass	warn	warn	pass	fail	pass	pass	pass
FD01874742.for.paired	FD01874742.for.paired	Original	Conventional base calls	Sanger / Illumina 1.9	1178727	0	0-143	50	71.6834	140.489	pass	pass	pass	pass	fail	warn	pass	fail	pass	pass	pass
FD01874742.rev.paired	FD01874742.rev.paired	Original	Conventional base calls	Sanger / Illumina 1.9	1178727	0	0-143	50	72.892	139.539	pass	pass	warn	pass	warn	warn	pass	fail	pass	pass	pass
FD01874743.for.paired	FD01874743.for.paired	Original	Conventional base calls	Sanger / Illumina 1.9	1043831	0	0-143	50	74.1512	140.163	pass	pass	pass	pass	fail	warn	pass	fail	pass	warn	pass
FD01874743.rev.paired	FD01874743.rev.paired	Original	Conventional base calls	Sanger / Illumina 1.9	1043831	0	0-143	50	75.3571	139.275	pass	pass	warn	pass	warn	warn	pass	fail	pass	pass	pass
FD01874744.for.paired	FD01874744.for.paired	Original	Conventional base calls	Sanger / Illumina 1.9	542026	0	0-143	50	82.6628	140.71	pass	pass	pass	pass	fail	warn	pass	fail	pass	pass	pass
FD01874744.rev.paired	FD01874744.rev.paired	Original	Conventional base calls	Sanger / Illumina 1.9	542026	0	0-143	50	83.4887	139.722	pass	pass	warn	pass	warn	warn	pass	fail	pass	pass	pass
FD01874745.for.paired	FD01874745.for.paired	Original	Conventional base calls	Sanger / Illumina 1.9	1209472	0	0-143	50	63.2509	140.788	pass	pass	pass	pass	fail	fail	pass	fail	warn	pass	pass
FD01874745.rev.paired	FD01874745.rev.paired	Original	Conventional base calls	Sanger / Illumina 1.9	1209472	0	0-143	50	64.8992	139.56	pass	pass	warn	pass	fail	warn	pass	fail	warn	pass	pass
FD01874746.for.paired	FD01874746.for.paired	Original	Conventional base calls	Sanger / Illumina 1.9	792513	0	0-143	50	73.3183	141.042	pass	pass	pass	pass	fail	warn	pass	fail	pass	pass	pass
FD01874746.rev.paired	FD01874746.rev.paired	Original	Conventional base calls	Sanger / Illumina 1.9	792513	0	0-143	50	74.7642	139.965	pass	pass	warn	pass	warn	warn	pass	fail	pass	pass	pass
FD01874747.for.paired	FD01874747.for.paired	Original	Conventional base calls	Sanger / Illumina 1.9	1148395	0	0-143	50	66.4864	140.42	pass	pass	pass	pass	fail	fail	pass	fail	warn	pass	pass
FD01874747.rev.paired	FD01874747.rev.paired	Original	Conventional base calls	Sanger / Illumina 1.9	1148395	0	0-143	50	68.1571	139.484	pass	pass	warn	pass	fail	warn	pass	fail	warn	pass	pass
FD01874748.for.paired	FD01874748.for.paired	Original	Conventional base calls	Sanger / Illumina 1.9	448486	0	0-143	50	84.476	140.465	pass	pass	pass	pass	fail	warn	pass	fail	pass	pass	pass
FD01874748.rev.paired	FD01874748.rev.paired	Original	Conventional base calls	Sanger / Illumina 1.9	448486	0	0-143	50	85.6388	139.473	pass	pass	warn	pass	warn	warn	pass	fail	pass	pass	pass
FD01874749.for.paired	FD01874749.for.paired	Original	Conventional base calls	Sanger / Illumina 1.9	507939	0	0-143	50	81.8452	140.549	pass	pass	pass	pass	fail	fail	pass	fail	pass	pass	pass
FD01874749.rev.paired	FD01874749.rev.paired	Original	Conventional base calls	Sanger / Illumina 1.9	507939	0	0-143	50	83.0709	139.641	pass	pass	warn	pass	fail	warn	pass	fail	pass	pass	pass
FD01874750.for.paired	FD01874750.for.paired	Original	Conventional base calls	Sanger / Illumina 1.9	1769856	0	0-143	50	64.084	140.594	pass	pass	pass	pass	fail	warn	pass	fail	warn	pass	pass
FD01874750.rev.paired	FD01874750.rev.paired	Original	Conventional base calls	Sanger / Illumina 1.9	1769856	0	0-143	50	65.6796	139.581	pass	pass	warn	pass	warn	warn	pass	fail	warn	pass	pass
FD01874751.for.paired	FD01874751.for.paired	Original	Conventional base calls	Sanger / Illumina 1.9	586016	0	0-143	51	80.5198	140.799	pass	pass	pass	pass	fail	warn	pass	fail	pass	pass	pass
FD01874751.rev.paired	FD01874751.rev.paired	Original	Conventional base calls	Sanger / Illumina 1.9	586016	0	0-143	51	81.5492	139.842	pass	pass	warn	pass	warn	warn	pass	fail	pass	pass	pass
FD01874752.for.paired	FD01874752.for.paired	Original	Conventional base calls	Sanger / Illumina 1.9	844327	0	0-143	50	73.2495	140.324	pass	pass	pass	pass	fail	fail	pass	fail	pass	pass	pass
FD01874752.rev.paired	FD01874752.rev.paired	Original	Conventional base calls	Sanger / Illumina 1.9	844327	0	0-143	50	74.4642	139.492	pass	pass	warn	pass	warn	warn	pass	fail	pass	pass	pass
FD01874753.for.paired	FD01874753.for.paired	Original	Conventional base calls	Sanger / Illumina 1.9	1509108	0	0-143	50	65.14	140.49	pass	pass	pass	pass	fail	warn	pass	fail	warn	pass	pass
FD01874753.rev.paired	FD01874753.rev.paired	Original	Conventional base calls	Sanger / Illumina 1.9	1509108	0	0-143	50	66.4574	139.621	pass	pass	warn	pass	fail	warn	pass	fail	warn	pass	pass
FD01874754.for.paired	FD01874754.for.paired	Original	Conventional base calls	Sanger / Illumina 1.9	795539	0	0-143	50	74.0071	140.782	pass	pass	pass	pass	fail	fail	pass	fail	pass	pass	pass
FD01874754.rev.paired	FD01874754.rev.paired	Original	Conventional base calls	Sanger / Illumina 1.9	795539	0	0-143	50	75.4671	139.775	pass	pass	warn	pass	warn	warn	pass	fail	pass	pass	pass
FD01874755.for.paired	FD01874755.for.paired	Original	Conventional base calls	Sanger / Illumina 1.9	1400300	0	0-143	49	65.8496	139.77	pass	pass	pass	pass	fail	fail	pass	fail	warn	pass	pass
FD01874755.rev.paired	FD01874755.rev.paired	Original	Conventional base calls	Sanger / Illumina 1.9	1400300	0	0-143	49	67.535	139.468	pass	pass	warn	pass	fail	warn	pass	fail	warn	pass	pass
FD01874756.for.paired	FD01874756.for.paired	Original	Conventional base calls	Sanger / Illumina 1.9	525316	0	0-143	50	81.681	139.789	pass	pass	pass	pass	fail	warn	pass	fail	pass	pass	pass
FD01874756.rev.paired	FD01874756.rev.paired	Original	Conventional base calls	Sanger / Illumina 1.9	525316	0	0-143	50	82.9194	139.498	pass	pass	warn	pass	warn	warn	pass	fail	pass	pass	pass
FD01874757.for.paired	FD01874757.for.paired	Original	Conventional base calls	Sanger / Illumina 1.9	815181	0	0-143	50	76.2839	140.887	pass	pass	pass	pass	fail	warn	pass	fail	pass	pass	pass
FD01874757.rev.paired	FD01874757.rev.paired	Original	Conventional base calls	Sanger / Illumina 1.9	815181	0	0-143	50	77.5054	139.877	pass	pass	warn	pass	warn	warn	pass	fail	pass	pass	pass
FD01874758.for.paired	FD01874758.for.paired	Original	Conventional base calls	Sanger / Illumina 1.9	377924	0	0-143	50	83.5103	140.437	pass	pass	pass	pass	fail	warn	pass	fail	pass	pass	pass
FD01874758.rev.paired	FD01874758.rev.paired	Original	Conventional base calls	Sanger / Illumina 1.9	377924	0	0-143	50	84.4223	139.517	pass	pass	warn	pass	warn	warn	pass	fail	pass	pass	pass
FD01874759.for.paired	FD01874759.for.paired	Original	Conventional base calls	Sanger / Illumina 1.9	721214	0	0-143	54	78.0608	139.762	pass	pass	pass	pass	fail	fail	pass	fail	pass	warn	pass
FD01874759.rev.paired	FD01874759.rev.paired	Original	Conventional base calls	Sanger / Illumina 1.9	721214	0	0-143	54	79.1895	138.836	pass	pass	warn	pass	fail	warn	pass	fail	pass	pass	pass
FD01874760.for.paired	FD01874760.for.paired	Original	Conventional base calls	Sanger / Illumina 1.9	780561	0	0-143	49	75.0047	140.452	pass	pass	pass	pass	fail	warn	pass	fail	pass	pass	pass
FD01874760.rev.paired	FD01874760.rev.paired	Original	Conventional base calls	Sanger / Illumina 1.9	780561	0	0-143	49	76.1192	139.536	pass	pass	warn	pass	fail	warn	pass	fail	pass	pass	pass
FD01874761.for.paired	FD01874761.for.paired	Original	Conventional base calls	Sanger / Illumina 1.9	869417	0	0-143	51	75.1062	140.101	pass	pass	pass	pass	fail	fail	pass	fail	pass	warn	pass
FD01874761.rev.paired	FD01874761.rev.paired	Original	Conventional base calls	Sanger / Illumina 1.9	869417	0	0-143	51	76.2908	139.279	pass	pass	warn	pass	fail	warn	pass	fail	pass	pass	pass
FD01874762.for.paired	FD01874762.for.paired	Original	Conventional base calls	Sanger / Illumina 1.9	916077	0	0-143	49	72.5855	140.486	pass	pass	pass	pass	fail	warn	pass	fail	pass	pass	pass
FD01874762.rev.paired	FD01874762.rev.paired	Original	Conventional base calls	Sanger / Illumina 1.9	916077	0	0-143	49	73.6152	139.614	pass	pass	warn	pass	warn	warn	pass	fail	pass	pass	pass
FD01874763.for.paired	FD01874763.for.paired	Original	Conventional base calls	Sanger / Illumina 1.9	831448	0	0-143	50	72.5629	140.659	pass	pass	pass	pass	fail	warn	pass	fail	pass	pass	pass
FD01874763.rev.paired	FD01874763.rev.paired	Original	Conventional base calls	Sanger / Illumina 1.9	831448	0	0-143	50	73.9761	139.619	pass	pass	warn	pass	warn	warn	pass	fail	pass	pass	pass
FD01874764.for.paired	FD01874764.for.paired	Original	Conventional base calls	Sanger / Illumina 1.9	544849	0	0-143	50	82.3692	140.11	pass	pass	pass	pass	fail	fail	pass	fail	pass	warn	pass
FD01874764.rev.paired	FD01874764.rev.paired	Original	Conventional base calls	Sanger / Illumina 1.9	544849	0	0-143	50	83.4096	139.297	pass	pass	warn	pass	warn	warn	pass	fail	pass	pass	pass
FD01874766.for.paired	FD01874766.for.paired	Original	Conventional base calls	Sanger / Illumina 1.9	1237493	0	0-143	49	69.5777	140.382	pass	pass	pass	pass	fail	warn	pass	fail	warn	pass	pass
FD01874766.rev.paired	FD01874766.rev.paired	Original	Conventional base calls	Sanger / Illumina 1.9	1237493	0	0-143	49	70.934	139.576	pass	pass	warn	pass	warn	warn	pass	fail	pass	pass	pass
FD01874767.for.paired	FD01874767.for.paired	Original	Conventional base calls	Sanger / Illumina 1.9	653958	0	0-143	50	79.1835	140.873	pass	pass	pass	pass	fail	warn	pass	fail	pass	pass	pass
FD01874767.rev.paired	FD01874767.rev.paired	Original	Conventional base calls	Sanger / Illumina 1.9	653958	0	0-143	50	80.3905	139.886	pass	pass	warn	pass	warn	warn	pass	fail	pass	pass	pass
FD01874768.for.paired	FD01874768.for.paired	Original	Conventional base calls	Sanger / Illumina 1.9	1423063	0	0-143	50	69.3324	140.447	pass	pass	pass	pass	fail	warn	pass	fail	warn	pass	pass
FD01874768.rev.paired	FD01874768.rev.paired	Original	Conventional base calls	Sanger / Illumina 1.9	1423063	0	0-143	50	70.539	139.612	pass	pass	warn	pass	warn	warn	pass	fail	pass	pass	pass
FD01874769.for.paired	FD01874769.for.paired	Original	Conventional base calls	Sanger / Illumina 1.9	996094	0	0-143	50	72.0556	140.725	pass	pass	pass	pass	fail	warn	pass	fail	pass	pass	pass
FD01874769.rev.paired	FD01874769.rev.paired	Original	Conventional base calls	Sanger / Illumina 1.9	996094	0	0-143	50	73.4267	139.738	pass	pass	warn	pass	fail	warn	pass	fail	pass	pass	pass
FD01874770.for.paired	FD01874770.for.paired	Original	Conventional base calls	Sanger / Illumina 1.9	1795151	0	0-143	50	64.9754	140.873	pass	pass	pass	pass	fail	warn	pass	fail	warn	pass	pass
FD01874770.rev.paired	FD01874770.rev.paired	Original	Conventional base calls	Sanger / Illumina 1.9	1795151	0	0-143	50	66.4366	139.802	pass	pass	warn	pass	fail	warn	pass	fail	warn	pass	pass
FD01874771.for.paired	FD01874771.for.paired	Original	Conventional base calls	Sanger / Illumina 1.9	541605	0	0-143	50	79.915	139.947	pass	pass	pass	pass	fail	warn	pass	fail	pass	pass	pass
FD01874771.rev.paired	FD01874771.rev.paired	Original	Conventional base calls	Sanger / Illumina 1.9	541605	0	0-143	50	81.1042	139.407	pass	pass	warn	pass	warn	warn	pass	fail	pass	pass	pass
FD01873909.comp.trim.for.paired	FD01873909.comp.trim.for.paired	Combined	Conventional base calls	Sanger / Illumina 1.9	4358328	0	0-242	50	47.7688	215.931	pass	pass	fail	pass	fail	fail	pass	fail	fail	warn	pass
FD01873909.comp.trim.rev.paired	FD01873909.comp.trim.rev.paired	Combined	Conventional base calls	Sanger / Illumina 1.9	4358328	0	0-242	50	49.0596	219.342	pass	pass	fail	pass	fail	fail	pass	fail	fail	pass	pass
FD01873927.comp.trim.for.paired	FD01873927.comp.trim.for.paired	Combined	Conventional base calls	Sanger / Illumina 1.9	3608519	0	0-242	49	42.3114	225.11	pass	pass	fail	pass	fail	fail	pass	fail	fail	warn	pass
FD01873927.comp.trim.rev.paired	FD01873927.comp.trim.rev.paired	Combined	Conventional base calls	Sanger / Illumina 1.9	3608519	0	0-242	49	43.9275	225.228	pass	pass	fail	pass	fail	fail	pass	fail	fail	warn	pass
FD01873942.comp.trim.for.paired	FD01873942.comp.trim.for.paired	Combined	Conventional base calls	Sanger / Illumina 1.9	3627032	0	0-242	50	46.9774	210.169	pass	pass	fail	pass	fail	fail	pass	fail	fail	warn	pass
FD01873942.comp.trim.rev.paired	FD01873942.comp.trim.rev.paired	Combined	Conventional base calls	Sanger / Illumina 1.9	3627032	0	0-242	50	48.6916	213.416	pass	pass	fail	pass	fail	fail	pass	fail	fail	pass	pass
FD01873949.comp.trim.for.paired	FD01873949.comp.trim.for.paired	Combined	Conventional base calls	Sanger / Illumina 1.9	3406265	0	0-242	49	45.9632	220.298	pass	pass	fail	pass	fail	fail	pass	fail	fail	warn	pass
FD01873949.comp.trim.rev.paired	FD01873949.comp.trim.rev.paired	Combined	Conventional base calls	Sanger / Illumina 1.9	3406265	0	0-242	49	47.32	221.609	pass	pass	fail	pass	fail	fail	pass	fail	fail	warn	pass
FD01873960.comp.trim.for.paired	FD01873960.comp.trim.for.paired	Combined	Conventional base calls	Sanger / Illumina 1.9	507893	0	0-242	49	61.2371	141.302	pass	pass	fail	pass	fail	fail	pass	fail	warn	pass	pass
FD01873960.comp.trim.rev.paired	FD01873960.comp.trim.rev.paired	Combined	Conventional base calls	Sanger / Illumina 1.9	507893	0	0-242	49	63.0078	140.166	pass	pass	fail	pass	fail	fail	pass	fail	warn	pass	pass
FD01873964.comp.trim.for.paired	FD01873964.comp.trim.for.paired	Combined	Conventional base calls	Sanger / Illumina 1.9	3004716	0	0-242	50	52.5064	215.416	pass	pass	fail	pass	fail	fail	pass	fail	warn	warn	pass
FD01873964.comp.trim.rev.paired	FD01873964.comp.trim.rev.paired	Combined	Conventional base calls	Sanger / Illumina 1.9	3004716	0	0-242	50	53.8242	217.647	pass	pass	fail	pass	fail	fail	pass	fail	warn	pass	pass
FD01873965.comp.trim.for.paired	FD01873965.comp.trim.for.paired	Combined	Conventional base calls	Sanger / Illumina 1.9	3221205	0	0-242	50	49.4294	207.581	pass	pass	fail	pass	fail	fail	pass	fail	fail	warn	pass
FD01873965.comp.trim.rev.paired	FD01873965.comp.trim.rev.paired	Combined	Conventional base calls	Sanger / Illumina 1.9	3221205	0	0-242	50	50.9281	211.642	pass	pass	fail	pass	fail	fail	pass	fail	warn	pass	pass
FD01873966.comp.trim.for.paired	FD01873966.comp.trim.for.paired	Combined	Conventional base calls	Sanger / Illumina 1.9	4524119	0	0-242	50	46.08	214.946	pass	pass	fail	pass	fail	fail	pass	fail	fail	warn	pass
FD01873966.comp.trim.rev.paired	FD01873966.comp.trim.rev.paired	Combined	Conventional base calls	Sanger / Illumina 1.9	4524119	0	0-242	50	47.392	218.883	pass	pass	fail	pass	fail	fail	pass	fail	fail	pass	pass
FD01873967.comp.trim.for.paired	FD01873967.comp.trim.for.paired	Combined	Conventional base calls	Sanger / Illumina 1.9	4053095	0	0-242	50	47.0499	210.182	pass	pass	fail	pass	fail	fail	pass	fail	fail	warn	pass
FD01873967.comp.trim.rev.paired	FD01873967.comp.trim.rev.paired	Combined	Conventional base calls	Sanger / Illumina 1.9	4053095	0	0-242	50	48.6726	215.051	pass	pass	fail	pass	fail	fail	pass	fail	fail	pass	pass
FD01873972.comp.trim.for.paired	FD01873972.comp.trim.for.paired	Combined	Conventional base calls	Sanger / Illumina 1.9	3878271	0	0-242	50	47.5273	218.117	pass	pass	fail	pass	fail	fail	pass	fail	fail	warn	pass
FD01873972.comp.trim.rev.paired	FD01873972.comp.trim.rev.paired	Combined	Conventional base calls	Sanger / Illumina 1.9	3878271	0	0-242	50	49.3479	221.426	pass	pass	fail	pass	fail	fail	pass	fail	fail	pass	pass
FD01873974.comp.trim.for.paired	FD01873974.comp.trim.for.paired	Combined	Conventional base calls	Sanger / Illumina 1.9	4157358	0	0-242	49	37.5433	222.149	pass	pass	fail	pass	fail	fail	pass	fail	fail	warn	pass
FD01873974.comp.trim.rev.paired	FD01873974.comp.trim.rev.paired	Combined	Conventional base calls	Sanger / Illumina 1.9	4157358	0	0-242	49	39.0213	222.82	pass	pass	fail	pass	fail	fail	pass	fail	fail	warn	pass
FD01873981.comp.trim.for.paired	FD01873981.comp.trim.for.paired	Combined	Conventional base calls	Sanger / Illumina 1.9	3638284	0	0-242	50	49.7068	219.992	pass	pass	fail	pass	fail	fail	pass	fail	fail	warn	pass
FD01873981.comp.trim.rev.paired	FD01873981.comp.trim.rev.paired	Combined	Conventional base calls	Sanger / Illumina 1.9	3638284	0	0-242	50	51.4724	221.239	pass	pass	fail	pass	fail	warn	pass	fail	warn	pass	pass
FD01873994.comp.trim.for.paired	FD01873994.comp.trim.for.paired	Combined	Conventional base calls	Sanger / Illumina 1.9	3774753	0	0-242	50	52.2475	227.622	pass	pass	fail	pass	fail	fail	pass	fail	warn	warn	pass
FD01873994.comp.trim.rev.paired	FD01873994.comp.trim.rev.paired	Combined	Conventional base calls	Sanger / Illumina 1.9	3774753	0	0-242	50	53.7501	228.639	pass	pass	fail	pass	fail	fail	pass	fail	warn	warn	pass
FD01873997.comp.trim.for.paired	FD01873997.comp.trim.for.paired	Combined	Conventional base calls	Sanger / Illumina 1.9	237082	0	0-242	49	60.4826	141.801	pass	pass	fail	pass	fail	warn	pass	fail	warn	warn	pass
FD01873997.comp.trim.rev.paired	FD01873997.comp.trim.rev.paired	Combined	Conventional base calls	Sanger / Illumina 1.9	237082	0	0-242	49	62.9168	140.632	pass	pass	fail	pass	fail	fail	pass	fail	warn	warn	pass
FD01874108.comp.trim.for.paired	FD01874108.comp.trim.for.paired	Combined	Conventional base calls	Sanger / Illumina 1.9	3437262	0	0-242	50	54.1937	215.035	pass	pass	fail	pass	fail	fail	pass	fail	warn	warn	pass
FD01874108.comp.trim.rev.paired	FD01874108.comp.trim.rev.paired	Combined	Conventional base calls	Sanger / Illumina 1.9	3437262	0	0-242	50	55.5358	217.038	pass	pass	fail	pass	fail	warn	pass	fail	warn	pass	pass
FD01874109.comp.trim.for.paired	FD01874109.comp.trim.for.paired	Combined	Conventional base calls	Sanger / Illumina 1.9	3646943	0	0-242	51	52.3947	217.871	pass	pass	fail	pass	fail	fail	pass	fail	warn	warn	pass
FD01874109.comp.trim.rev.paired	FD01874109.comp.trim.rev.paired	Combined	Conventional base calls	Sanger / Illumina 1.9	3646943	0	0-242	51	54.0879	219.895	pass	pass	fail	pass	fail	fail	pass	fail	warn	pass	pass
FD01874114.comp.trim.for.paired	FD01874114.comp.trim.for.paired	Combined	Conventional base calls	Sanger / Illumina 1.9	4302467	0	0-242	50	50.9025	203.439	pass	pass	fail	pass	fail	fail	pass	fail	warn	warn	pass
FD01874114.comp.trim.rev.paired	FD01874114.comp.trim.rev.paired	Combined	Conventional base calls	Sanger / Illumina 1.9	4302467	0	0-242	50	51.8943	210.003	pass	pass	fail	pass	fail	fail	pass	fail	warn	pass	pass
FD01874116.comp.trim.for.paired	FD01874116.comp.trim.for.paired	Combined	Conventional base calls	Sanger / Illumina 1.9	4121252	0	0-242	51	53.5735	204.021	pass	pass	fail	pass	fail	fail	pass	fail	warn	warn	pass
FD01874116.comp.trim.rev.paired	FD01874116.comp.trim.rev.paired	Combined	Conventional base calls	Sanger / Illumina 1.9	4121252	0	0-242	51	54.6454	210.652	pass	pass	fail	pass	fail	fail	pass	fail	warn	pass	pass
FD01874118.comp.trim.for.paired	FD01874118.comp.trim.for.paired	Combined	Conventional base calls	Sanger / Illumina 1.9	2259520	0	0-242	51	62.8321	215.865	pass	pass	fail	pass	fail	fail	pass	fail	warn	pass	pass
FD01874118.comp.trim.rev.paired	FD01874118.comp.trim.rev.paired	Combined	Conventional base calls	Sanger / Illumina 1.9	2259520	0	0-242	51	63.1292	216.719	pass	pass	fail	pass	fail	fail	pass	fail	warn	pass	pass
FD01874122.comp.trim.for.paired	FD01874122.comp.trim.for.paired	Combined	Conventional base calls	Sanger / Illumina 1.9	486299	0	0-242	49	74.7461	140.52	pass	pass	warn	pass	fail	fail	pass	fail	pass	pass	pass
FD01874122.comp.trim.rev.paired	FD01874122.comp.trim.rev.paired	Combined	Conventional base calls	Sanger / Illumina 1.9	486299	0	0-242	49	76.1648	139.966	pass	pass	warn	pass	fail	warn	pass	fail	pass	pass	pass
FD01874124.comp.trim.for.paired	FD01874124.comp.trim.for.paired	Combined	Conventional base calls	Sanger / Illumina 1.9	2472350	0	0-242	51	64.2064	218.264	pass	pass	fail	pass	fail	fail	pass	fail	warn	pass	pass
FD01874124.comp.trim.rev.paired	FD01874124.comp.trim.rev.paired	Combined	Conventional base calls	Sanger / Illumina 1.9	2472350	0	0-242	51	65.2481	219.049	pass	pass	fail	pass	fail	fail	pass	fail	warn	pass	pass
FD01874125.comp.trim.for.paired	FD01874125.comp.trim.for.paired	Combined	Conventional base calls	Sanger / Illumina 1.9	3694164	0	0-242	50	55.1042	221.706	pass	pass	fail	pass	fail	fail	pass	fail	warn	warn	pass
FD01874125.comp.trim.rev.paired	FD01874125.comp.trim.rev.paired	Combined	Conventional base calls	Sanger / Illumina 1.9	3694164	0	0-242	50	56.5932	223.088	pass	pass	fail	pass	fail	warn	pass	fail	warn	pass	pass
FD01874126.comp.trim.for.paired	FD01874126.comp.trim.for.paired	Combined	Conventional base calls	Sanger / Illumina 1.9	696030	0	0-242	51	78.6876	163.265	pass	pass	fail	pass	fail	warn	pass	fail	pass	pass	pass
FD01874126.comp.trim.rev.paired	FD01874126.comp.trim.rev.paired	Combined	Conventional base calls	Sanger / Illumina 1.9	696030	0	0-242	50	79.4736	162.803	pass	pass	fail	pass	fail	warn	pass	fail	pass	pass	pass
FD01874130.comp.trim.for.paired	FD01874130.comp.trim.for.paired	Combined	Conventional base calls	Sanger / Illumina 1.9	609179	0	0-242	50	76.7752	162.004	pass	pass	fail	pass	fail	warn	pass	fail	pass	pass	pass
FD01874130.comp.trim.rev.paired	FD01874130.comp.trim.rev.paired	Combined	Conventional base calls	Sanger / Illumina 1.9	609179	0	0-242	50	78.0161	161.224	pass	pass	fail	pass	warn	warn	pass	fail	pass	pass	pass
FD01874131.comp.trim.for.paired	FD01874131.comp.trim.for.paired	Combined	Conventional base calls	Sanger / Illumina 1.9	3555490	0	0-242	51	54.8843	214.584	pass	pass	fail	pass	fail	fail	pass	fail	warn	warn	pass
FD01874131.comp.trim.rev.paired	FD01874131.comp.trim.rev.paired	Combined	Conventional base calls	Sanger / Illumina 1.9	3555490	0	0-242	51	56.3705	217.155	pass	pass	fail	pass	fail	warn	pass	fail	warn	pass	pass
FD01874132.comp.trim.for.paired	FD01874132.comp.trim.for.paired	Combined	Conventional base calls	Sanger / Illumina 1.9	3257107	0	0-242	51	57.8687	221.824	pass	pass	fail	pass	fail	fail	pass	fail	warn	warn	pass
FD01874132.comp.trim.rev.paired	FD01874132.comp.trim.rev.paired	Combined	Conventional base calls	Sanger / Illumina 1.9	3257107	0	0-242	51	59.7691	222.863	pass	pass	fail	pass	fail	fail	pass	fail	warn	pass	pass
FD01874134.comp.trim.for.paired	FD01874134.comp.trim.for.paired	Combined	Conventional base calls	Sanger / Illumina 1.9	3291745	0	0-242	51	55.7274	214.464	pass	pass	fail	pass	fail	fail	pass	fail	warn	warn	pass
FD01874134.comp.trim.rev.paired	FD01874134.comp.trim.rev.paired	Combined	Conventional base calls	Sanger / Illumina 1.9	3291745	0	0-242	51	57.0823	216.828	pass	pass	fail	pass	fail	fail	pass	fail	warn	pass	pass
FD01874137.comp.trim.for.paired	FD01874137.comp.trim.for.paired	Combined	Conventional base calls	Sanger / Illumina 1.9	3088807	0	0-242	49	48.556	219.687	pass	pass	fail	pass	fail	fail	pass	fail	fail	warn	pass
FD01874137.comp.trim.rev.paired	FD01874137.comp.trim.rev.paired	Combined	Conventional base calls	Sanger / Illumina 1.9	3088807	0	0-242	49	49.6225	221.027	pass	pass	fail	pass	fail	fail	pass	fail	fail	warn	pass
FD01874138.comp.trim.for.paired	FD01874138.comp.trim.for.paired	Combined	Conventional base calls	Sanger / Illumina 1.9	472200	0	0-242	50	80.6596	144.652	pass	pass	fail	pass	fail	warn	pass	fail	pass	pass	pass
FD01874138.comp.trim.rev.paired	FD01874138.comp.trim.rev.paired	Combined	Conventional base calls	Sanger / Illumina 1.9	472200	0	0-242	50	81.7304	143.82	pass	pass	fail	pass	warn	warn	pass	fail	pass	pass	pass
FD01874139.comp.trim.for.paired	FD01874139.comp.trim.for.paired	Combined	Conventional base calls	Sanger / Illumina 1.9	3885202	0	0-242	51	52.725	219.583	pass	pass	fail	pass	fail	fail	pass	fail	warn	warn	pass
FD01874139.comp.trim.rev.paired	FD01874139.comp.trim.rev.paired	Combined	Conventional base calls	Sanger / Illumina 1.9	3885202	0	0-242	51	54.01	221.261	pass	pass	fail	pass	fail	fail	pass	fail	warn	pass	pass
FD01874140.comp.trim.for.paired	FD01874140.comp.trim.for.paired	Combined	Conventional base calls	Sanger / Illumina 1.9	3132339	0	0-242	51	59.144	224.285	pass	pass	fail	pass	fail	fail	pass	fail	warn	pass	pass
FD01874140.comp.trim.rev.paired	FD01874140.comp.trim.rev.paired	Combined	Conventional base calls	Sanger / Illumina 1.9	3132339	0	0-242	50	58.5271	224.448	pass	pass	fail	pass	fail	fail	pass	fail	warn	pass	pass
FD01874150.comp.trim.for.paired	FD01874150.comp.trim.for.paired	Combined	Conventional base calls	Sanger / Illumina 1.9	3230173	0	0-242	51	57.6685	213.52	pass	pass	fail	pass	fail	fail	pass	fail	warn	warn	pass
FD01874150.comp.trim.rev.paired	FD01874150.comp.trim.rev.paired	Combined	Conventional base calls	Sanger / Illumina 1.9	3230173	0	0-242	51	58.6997	215.927	pass	pass	fail	pass	fail	fail	pass	fail	warn	pass	pass
FD01874153.comp.trim.for.paired	FD01874153.comp.trim.for.paired	Combined	Conventional base calls	Sanger / Illumina 1.9	3413636	0	0-242	51	52.1209	220.224	pass	pass	fail	pass	fail	fail	pass	fail	warn	warn	pass
FD01874153.comp.trim.rev.paired	FD01874153.comp.trim.rev.paired	Combined	Conventional base calls	Sanger / Illumina 1.9	3413636	0	0-242	50	53.6267	222.082	pass	pass	fail	pass	fail	fail	pass	fail	warn	pass	pass
FD01874154.comp.trim.for.paired	FD01874154.comp.trim.for.paired	Combined	Conventional base calls	Sanger / Illumina 1.9	423260	0	0-242	50	80.0456	140.927	pass	pass	fail	pass	fail	warn	pass	fail	pass	pass	pass
FD01874154.comp.trim.rev.paired	FD01874154.comp.trim.rev.paired	Combined	Conventional base calls	Sanger / Illumina 1.9	423260	0	0-242	50	81.2061	140.043	pass	pass	fail	pass	warn	warn	pass	fail	pass	pass	pass
FD01874155.comp.trim.for.paired	FD01874155.comp.trim.for.paired	Combined	Conventional base calls	Sanger / Illumina 1.9	3536480	0	0-242	51	57.6916	223.969	pass	pass	fail	pass	fail	fail	pass	fail	warn	pass	pass
FD01874155.comp.trim.rev.paired	FD01874155.comp.trim.rev.paired	Combined	Conventional base calls	Sanger / Illumina 1.9	3536480	0	0-242	51	57.3292	224.686	pass	pass	fail	pass	fail	fail	pass	fail	warn	pass	pass
FD01874157.comp.trim.for.paired	FD01874157.comp.trim.for.paired	Combined	Conventional base calls	Sanger / Illumina 1.9	2933961	0	0-242	50	59.4704	220.419	pass	pass	fail	pass	fail	fail	pass	fail	warn	warn	pass
FD01874157.comp.trim.rev.paired	FD01874157.comp.trim.rev.paired	Combined	Conventional base calls	Sanger / Illumina 1.9	2933961	0	0-242	50	60.295	221.555	pass	pass	fail	pass	fail	warn	pass	fail	warn	pass	pass
FD01874158.comp.trim.for.paired	FD01874158.comp.trim.for.paired	Combined	Conventional base calls	Sanger / Illumina 1.9	1580418	0	0-242	51	70.3776	180.987	pass	pass	fail	pass	fail	fail	pass	fail	pass	warn	pass
FD01874158.comp.trim.rev.paired	FD01874158.comp.trim.rev.paired	Combined	Conventional base calls	Sanger / Illumina 1.9	1580418	0	0-242	50	70.9191	187.763	pass	pass	fail	pass	fail	warn	pass	fail	pass	pass	pass
FD01874159.comp.trim.for.paired	FD01874159.comp.trim.for.paired	Combined	Conventional base calls	Sanger / Illumina 1.9	3582076	0	0-242	50	49.3117	221.063	pass	pass	fail	pass	fail	fail	pass	fail	fail	warn	pass
FD01874159.comp.trim.rev.paired	FD01874159.comp.trim.rev.paired	Combined	Conventional base calls	Sanger / Illumina 1.9	3582076	0	0-242	50	50.6954	222.571	pass	pass	fail	pass	fail	fail	pass	fail	warn	warn	pass
FD01874161.comp.trim.for.paired	FD01874161.comp.trim.for.paired	Combined	Conventional base calls	Sanger / Illumina 1.9	3247123	0	0-242	49	42.8706	221.456	pass	pass	fail	pass	fail	fail	pass	fail	fail	warn	pass
FD01874161.comp.trim.rev.paired	FD01874161.comp.trim.rev.paired	Combined	Conventional base calls	Sanger / Illumina 1.9	3247123	0	0-242	49	44.0592	222.366	pass	pass	fail	pass	fail	fail	pass	fail	fail	warn	pass
FD01874164.comp.trim.for.paired	FD01874164.comp.trim.for.paired	Combined	Conventional base calls	Sanger / Illumina 1.9	4330763	0	0-242	51	50.5514	209.404	pass	pass	fail	pass	fail	fail	pass	fail	warn	warn	pass
FD01874164.comp.trim.rev.paired	FD01874164.comp.trim.rev.paired	Combined	Conventional base calls	Sanger / Illumina 1.9	4330763	0	0-242	51	51.8368	214.274	pass	pass	fail	pass	fail	fail	pass	fail	warn	pass	pass
FD01874167.comp.trim.for.paired	FD01874167.comp.trim.for.paired	Combined	Conventional base calls	Sanger / Illumina 1.9	3796734	0	0-242	50	51.1864	205.096	pass	pass	fail	pass	fail	fail	pass	fail	warn	warn	pass
FD01874167.comp.trim.rev.paired	FD01874167.comp.trim.rev.paired	Combined	Conventional base calls	Sanger / Illumina 1.9	3796734	0	0-242	50	51.3485	209.384	pass	pass	fail	pass	fail	fail	pass	fail	warn	pass	pass
FD01874171.comp.trim.for.paired	FD01874171.comp.trim.for.paired	Combined	Conventional base calls	Sanger / Illumina 1.9	5130266	0	0-242	51	50.5554	186.674	pass	pass	fail	pass	fail	fail	pass	fail	warn	warn	pass
FD01874171.comp.trim.rev.paired	FD01874171.comp.trim.rev.paired	Combined	Conventional base calls	Sanger / Illumina 1.9	5130266	0	0-242	51	50.3086	198.549	pass	pass	fail	pass	fail	warn	pass	fail	warn	pass	pass
FD01874172.comp.trim.for.paired	FD01874172.comp.trim.for.paired	Combined	Conventional base calls	Sanger / Illumina 1.9	6356165	0	0-242	51	46.8086	177.431	pass	pass	fail	pass	fail	fail	pass	fail	fail	warn	pass
FD01874172.comp.trim.rev.paired	FD01874172.comp.trim.rev.paired	Combined	Conventional base calls	Sanger / Illumina 1.9	6356165	0	0-242	51	47.2099	192.493	pass	pass	fail	pass	fail	warn	pass	fail	fail	pass	pass
FD01874173.comp.trim.for.paired	FD01874173.comp.trim.for.paired	Combined	Conventional base calls	Sanger / Illumina 1.9	4842247	0	0-242	52	49.7103	199.83	pass	pass	fail	pass	fail	fail	pass	fail	fail	warn	pass
FD01874173.comp.trim.rev.paired	FD01874173.comp.trim.rev.paired	Combined	Conventional base calls	Sanger / Illumina 1.9	4842247	0	0-242	52	50.4011	207.83	pass	pass	fail	pass	fail	fail	pass	fail	warn	pass	pass
FD01874180.comp.trim.for.paired	FD01874180.comp.trim.for.paired	Combined	Conventional base calls	Sanger / Illumina 1.9	2913575	0	0-242	51	60.6587	215.54	pass	pass	fail	pass	fail	fail	pass	fail	warn	warn	pass
FD01874180.comp.trim.rev.paired	FD01874180.comp.trim.rev.paired	Combined	Conventional base calls	Sanger / Illumina 1.9	2913575	0	0-242	51	61.724	217.037	pass	pass	fail	pass	fail	warn	pass	fail	warn	pass	pass
FD01874181.comp.trim.for.paired	FD01874181.comp.trim.for.paired	Combined	Conventional base calls	Sanger / Illumina 1.9	3196736	0	0-242	51	57.6544	216.617	pass	pass	fail	pass	fail	fail	pass	fail	warn	warn	pass
FD01874181.comp.trim.rev.paired	FD01874181.comp.trim.rev.paired	Combined	Conventional base calls	Sanger / Illumina 1.9	3196736	0	0-242	51	58.9215	218.904	pass	pass	fail	pass	fail	fail	pass	fail	warn	pass	pass
FD01874182.comp.trim.for.paired	FD01874182.comp.trim.for.paired	Combined	Conventional base calls	Sanger / Illumina 1.9	4259547	0	0-242	51	56.0492	216.625	pass	pass	fail	pass	fail	fail	pass	fail	warn	warn	pass
FD01874182.comp.trim.rev.paired	FD01874182.comp.trim.rev.paired	Combined	Conventional base calls	Sanger / Illumina 1.9	4259547	0	0-242	51	56.9573	220.542	pass	pass	fail	pass	fail	fail	pass	fail	warn	pass	pass
FD01874184.comp.trim.for.paired	FD01874184.comp.trim.for.paired	Combined	Conventional base calls	Sanger / Illumina 1.9	2862359	0	0-242	51	57.2176	222.551	pass	pass	fail	pass	fail	fail	pass	fail	warn	warn	pass
FD01874184.comp.trim.rev.paired	FD01874184.comp.trim.rev.paired	Combined	Conventional base calls	Sanger / Illumina 1.9	2862359	0	0-242	51	58.293	223.636	pass	pass	fail	pass	fail	fail	pass	fail	warn	pass	pass
FD01874185.comp.trim.for.paired	FD01874185.comp.trim.for.paired	Combined	Conventional base calls	Sanger / Illumina 1.9	3109253	0	0-242	49	45.1052	219.362	pass	pass	fail	pass	fail	fail	pass	fail	fail	warn	pass
FD01874185.comp.trim.rev.paired	FD01874185.comp.trim.rev.paired	Combined	Conventional base calls	Sanger / Illumina 1.9	3109253	0	0-242	49	46.272	221.392	pass	pass	fail	pass	fail	fail	pass	fail	fail	warn	pass
FD01874188.comp.trim.for.paired	FD01874188.comp.trim.for.paired	Combined	Conventional base calls	Sanger / Illumina 1.9	3454029	0	0-242	51	55.6473	212.414	pass	pass	fail	pass	fail	fail	pass	fail	warn	warn	pass
FD01874188.comp.trim.rev.paired	FD01874188.comp.trim.rev.paired	Combined	Conventional base calls	Sanger / Illumina 1.9	3454029	0	0-242	51	57.1496	215.058	pass	pass	fail	pass	fail	fail	pass	fail	warn	pass	pass
FD01874193.comp.trim.for.paired	FD01874193.comp.trim.for.paired	Combined	Conventional base calls	Sanger / Illumina 1.9	3281556	0	0-242	50	53.1848	220.941	pass	pass	fail	pass	fail	fail	pass	fail	warn	warn	pass
[truncated: 29 more rows]

## Sheet: flexneri map QC
Sample	Original or resequenced	FastQC_mqc-generalstats-fastqc-percent_duplicates	FastQC_mqc-generalstats-fastqc-percent_gc	FastQC_mqc-generalstats-fastqc-avg_sequence_length	FastQC_mqc-generalstats-fastqc-percent_fails	FastQC_mqc-generalstats-fastqc-total_sequences	QualiMap_mqc-generalstats-qualimap-percentage_aligned	QualiMap_mqc-generalstats-qualimap-mapped_reads	QualiMap_mqc-generalstats-qualimap-total_reads	QualiMap_mqc-generalstats-qualimap-general_error_rate	QualiMap_mqc-generalstats-qualimap-avg_gc	QualiMap_mqc-generalstats-qualimap-median_insert_size	QualiMap_mqc-generalstats-qualimap-1_x_pc	QualiMap_mqc-generalstats-qualimap-5_x_pc	QualiMap_mqc-generalstats-qualimap-10_x_pc	QualiMap_mqc-generalstats-qualimap-30_x_pc	QualiMap_mqc-generalstats-qualimap-50_x_pc	QualiMap_mqc-generalstats-qualimap-median_coverage
[truncated: 468 more rows]

[truncated: 11 more sheets: sonnei map QC, flexneri quast, sonnei quast, Reference isolates, AMR genotyping results, AMR results, Local virulence database, Virulence genotyping results, SRL mapping S. flexneri, pINV mapping S. sonnei, reference virulence loci genome]
